# Supplementary material
Source: PubMed Central journal article supplement (PMC10074325)
Supplement: NIHMS1885972-supplement-1.pdf [file NIHMS1885972-supplement-1.pdf]

## **Document S1: Data S1 - Data S35**

Additional figures for “The EN-TE<sub>x</sub> resource of multi-tissue personal epigenomes & variant-impact models.”

## Table of contents

|                                                                                                                                                |    |
|------------------------------------------------------------------------------------------------------------------------------------------------|----|
| Data S1. Glossary                                                                                                                              | 4  |
| Data S2. Personal genome construction, related to Figure 1, Figure S1, and STAR Methods “Personal Genome” Section                              | 7  |
| Data S3. Personal Hi-C, related to STAR Methods “Data Stack” Section                                                                           | 10 |
| Data S4. Personal proteomics, related to STAR Methods “Data Stack” Section                                                                     | 13 |
| Data S5. Mapping to personal genomes, related to Figure S2 and STAR Methods “Reference Comparison” Section                                     | 17 |
| Data S6. Variation explained or similarity between experiments, related to Figure S2 and STAR Methods “Variation Analysis” Section             | 21 |
| Data S7. AlleleSeq2 and haplotype-specific signal tracks, related to STAR Methods “AS Calling” Section                                         | 24 |
| Data S8. AS SNVs, related to Figure S3 and STAR Methods “AS Calling” Section                                                                   | 26 |
| Data S9. Allele specific methylation, related to STAR Methods “AS Calling” Section                                                             | 28 |
| Data S10. Haplotype-specific Hi-C, related to STAR Methods “AS Calling” Section                                                                | 31 |
| Data S11. AS elements, related to Figure S3 and STAR Methods “AS Elements” Section                                                             | 33 |
| Data S12. Construction of a validation dataset from AS events in non-EN-TE <sub>x</sub> datasets, related to STAR Methods “AS Catalog” Section | 35 |
| Data S13. High-power AS calling, related to STAR Methods “AS Catalog” Section                                                                  | 37 |
| Data S14. Coordinated allele-specific activity on X Chromosome across assays, related to Figure 2 and STAR Methods “AS Examples” Section       | 42 |
| Data S15. Analysis of SVs, related to Figure 1 and STAR Methods “SVs” Section                                                                  | 45 |
| Data S16. Association between ASE events and indels or SVs, related to Figure 2 and STAR Methods “SVs” Section                                 | 48 |
| Data S17. Examples of SVs associated with changes in gene expression, related to Figure 2, Figure S4, and STAR Methods “SVs” Section           | 53 |
| Data S18. Potential perturbations of SVs to the chromatin states of neighboring regions, related to Figure 2 and STAR Methods “SVs” Section    | 57 |
| Data S19. cCRE decoration, related to Figure 3, Figure S5, and STAR Methods “Decoration Process” Section                                       | 59 |
| Data S20. Identifying repressed elements, related to Figure 3 and STAR Methods “Decoration Process” Section                                    | 62 |
| Data S21. cCRE enrichment with respect to A/B compartments “Decoration Process” Section                                                        | 63 |
| Data S22. Tissue specificity of AS events, related to Figure 3, Figure S5, and STAR Methods “Tissue Specificity” Section                       | 70 |

|                                                                                                                                                                                                                              |     |
|------------------------------------------------------------------------------------------------------------------------------------------------------------------------------------------------------------------------------|-----|
| Data S23. Conservation of cCREs, related to Figure 3 and STAR Methods “Tissue Specificity”<br>Section                                                                                                                        | 74  |
| Data S24. eQTLs in cCREs, related to Figure 4 and STAR Methods “Decoration Enrichments”<br>Section                                                                                                                           | 77  |
| Data S25. GWAS enrichment, related to Figure 4 and STAR Methods “Decoration<br>Enrichments” Section                                                                                                                          | 83  |
| Data S26. Compatibility between allelic events, related to Figure 4, Figure S5, and STAR<br>Methods “Compatibility” Section                                                                                                  | 86  |
| Data S27. Correlation between chromatin features and eQTL activity, related to Figure S6 and<br>STAR Methods “transferQTL Model” Section                                                                                     | 88  |
| Data S28. Building a predictive model that transfers eQTLs from a donor tissue to a target<br>tissue: features, performance, and validation, related to Figure 5, Figure S6, and STAR<br>Methods “transferQTL Model” Section | 94  |
| Data S29. Model interpretation and evaluating the impact of tissue specificity on predicted<br>eQTLs, related to Figure 5, Figure S6, and STAR Methods “transferQTL Model” Section                                           | 97  |
| Data S30. Motif analysis, related to Figure 6, Figure S7, and STAR Methods “Sensitive Motifs”<br>Section                                                                                                                     | 102 |
| Data S31. Predicting ASB from ASE, related to Figure 6, Figure S7, and STAR Methods “AS<br>Promoter” Section                                                                                                                 | 106 |
| Data S32. Deep-learning model predicting AS activity from nucleotide sequence, related to<br>Figure 7, Figure S7, and STAR Methods “Transformer Model” Section                                                               | 112 |
| Data S33. Visualization of EN-TE <sub>x</sub> data, related to STAR Methods “Portal” Section                                                                                                                                 | 116 |
| Data S34. Additional analyses with EN-TE <sub>x</sub> data but outside of the scope of this study                                                                                                                            | 119 |
| Data S35. Coverage of EN-TE <sub>x</sub> AS hetSNVs in GTE <sub>x</sub> -corresponding individual tissue, related<br>to STAR Methods “AS Calling” Section                                                                    | 120 |
| References                                                                                                                                                                                                                   | 121 |

|                                                                       |                                                                                                                                                                                                                                                                                                                                                                                                                                                                            |
|-----------------------------------------------------------------------|----------------------------------------------------------------------------------------------------------------------------------------------------------------------------------------------------------------------------------------------------------------------------------------------------------------------------------------------------------------------------------------------------------------------------------------------------------------------------|
| Assay for Transposase-Accessible Chromatin using sequencing, ATAC-seq | A method to determine genomic regions with open chromatin (i.e., sequences not wrapped in nucleosomes). The method uses transposase to insert tags into open chromatins, allowing these regions to be identified by DNA sequencing.                                                                                                                                                                                                                                        |
| Allele specific, AS                                                   | Most genomic regions, e.g., an open reading frame, exist on both sister chromosomes. In genetics, the two copies of the same genomic regions are called alleles of the genomic regions. The biological activity, such as gene expression and histone modification, from one allele can be much higher than that from the other allele. In such a case, the biological activity of the particular genomic region is allele specific, or imbalanced between the two alleles. |
| Allele-specific binding, ASB                                          | The histone modification level (quantified by the number of reads from ChIP-seq) of one allele is significantly higher than that of the other allele.                                                                                                                                                                                                                                                                                                                      |
| Allele-specific expression, ASE                                       | The expression level of a gene from one allele is significantly higher than that from the other allele.                                                                                                                                                                                                                                                                                                                                                                    |
| Candidate cis regulatory element, cCRE                                | Genomic region that potentially regulates the expression of nearby and/distal genes. Most of the sequences are non-coding sequences.                                                                                                                                                                                                                                                                                                                                       |
| Chromatin immunoprecipitation followed by sequencing, ChIP-seq        | A method to determine the DNA sequences bound by a given protein. Proteins, along with the DNA bound by the protein, are isolated through immunoprecipitation, and then the identity of the DNA is revealed by sequencing. Even proteins that carry post-translational modifications, e.g., acetylation, can be pulled down by special antibodies.                                                                                                                         |
| DNase-seq                                                             | Another method to determine open genomic regions. DNA that is not wrapped in nucleosomes is easily degraded by DNase, and generates less reads when sequenced.                                                                                                                                                                                                                                                                                                             |
| Quantitative trait locus, QTL                                         | The levels of a quantitative trait, e.g., the expression levels of a particular gene, of an individual often correlate with the specific alleles that the individual carries at particular loci. These loci are called QTLs. If the trait of interest is the expression level of a gene, the loci are called eQTLs.                                                                                                                                                        |
| Haplotype                                                             | All DNA sequences that are inherited from one parent.                                                                                                                                                                                                                                                                                                                                                                                                                      |
| Maternal/Paternal                                                     | Genetic materials inherited from the mother/father.                                                                                                                                                                                                                                                                                                                                                                                                                        |
| Phase                                                                 | When variants are identified from genomic sequencing results, it is possible to determine whether they come from the same sister chromosomes. Variants that come from a continuous block of the same chromosome are in the same phase.                                                                                                                                                                                                                                     |
| RNA sequencing, RNA-seq                                               | A method to determine the levels of RNA expressed. Total RNA (or a subset, e.g., mRNA) is isolated from samples, converted to cDNA, and sequenced. The last step determines the amount and sequence of each RNA, which allows the RNA to be mapped to specific loci (e.g., a gene) in the genome.                                                                                                                                                                          |
| Structural variant, SV                                                | Large ( $\geq 50$ bp) mutations, such as insertions, deletions, and inversions                                                                                                                                                                                                                                                                                                                                                                                             |
| Transposable element, TE                                              | DNA sequences that can relocate in the genome. The relocation can create structural variants at the original and the new locations of the TEs. TEs can be classified based on their sequences. Examples of TE families are SINE (short interspersed nuclear elements), LINE (long interspersed nuclear elements), and SVA (SINE-VNTR-Alus) retrotransposon.                                                                                                                |

### Data S1. Glossary

Terms and acronyms that are frequently used in the manuscript.



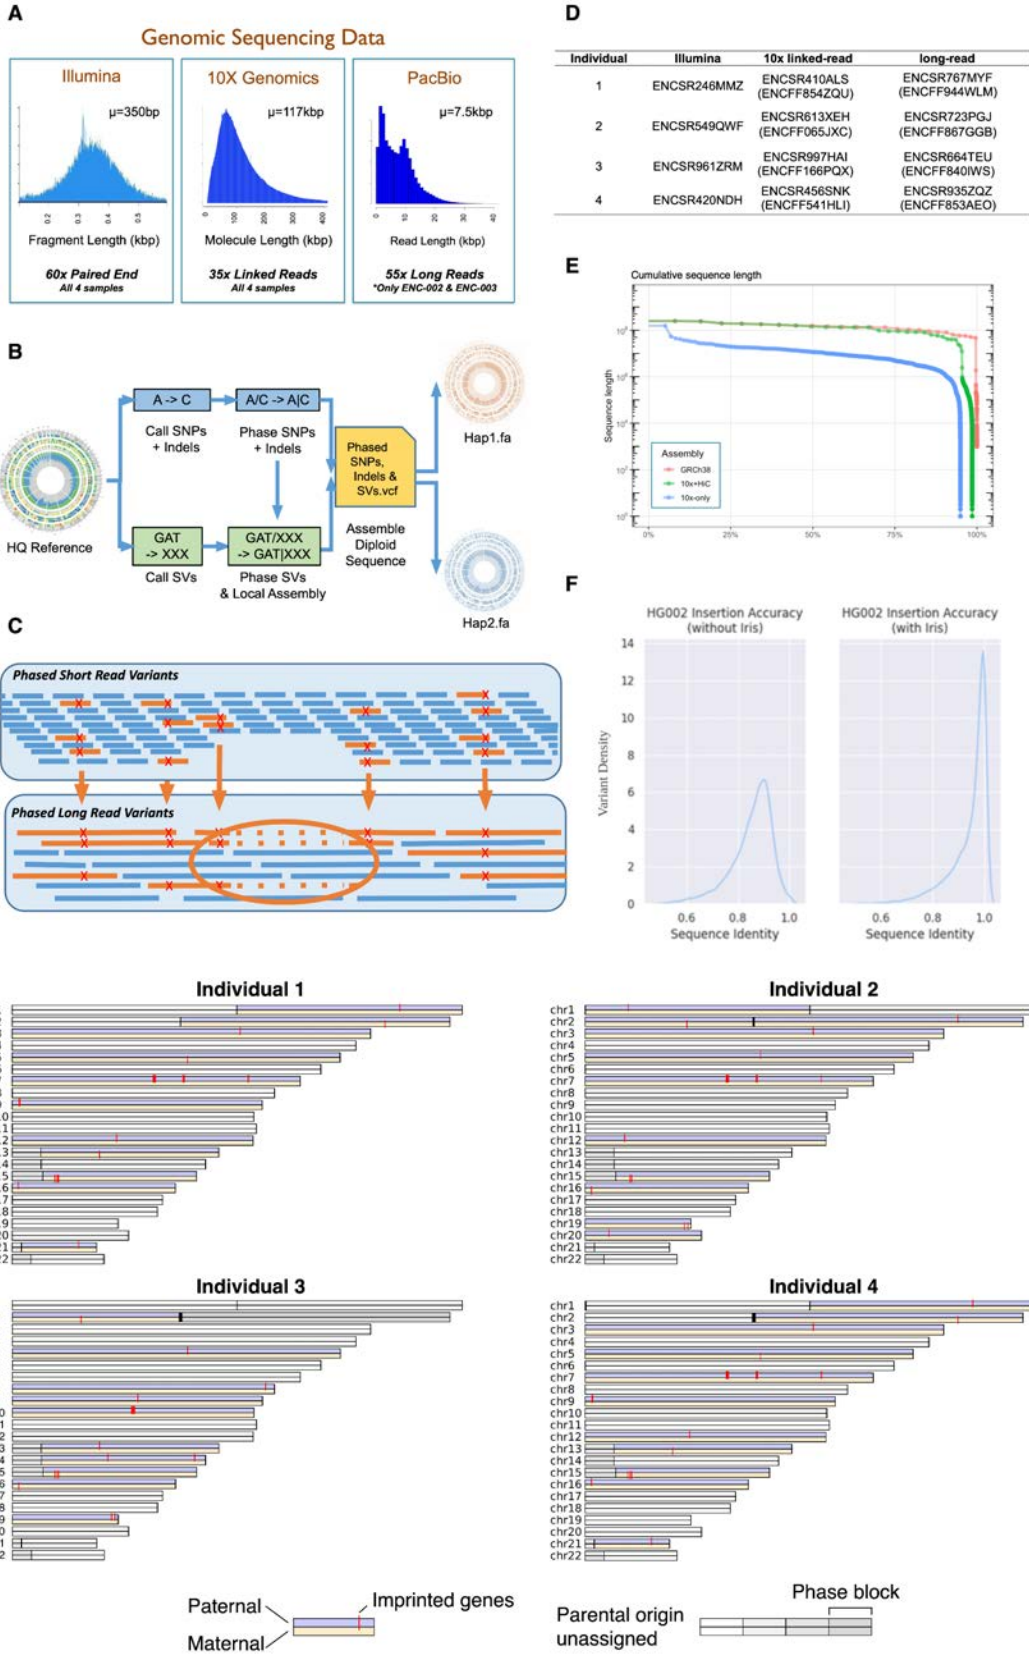

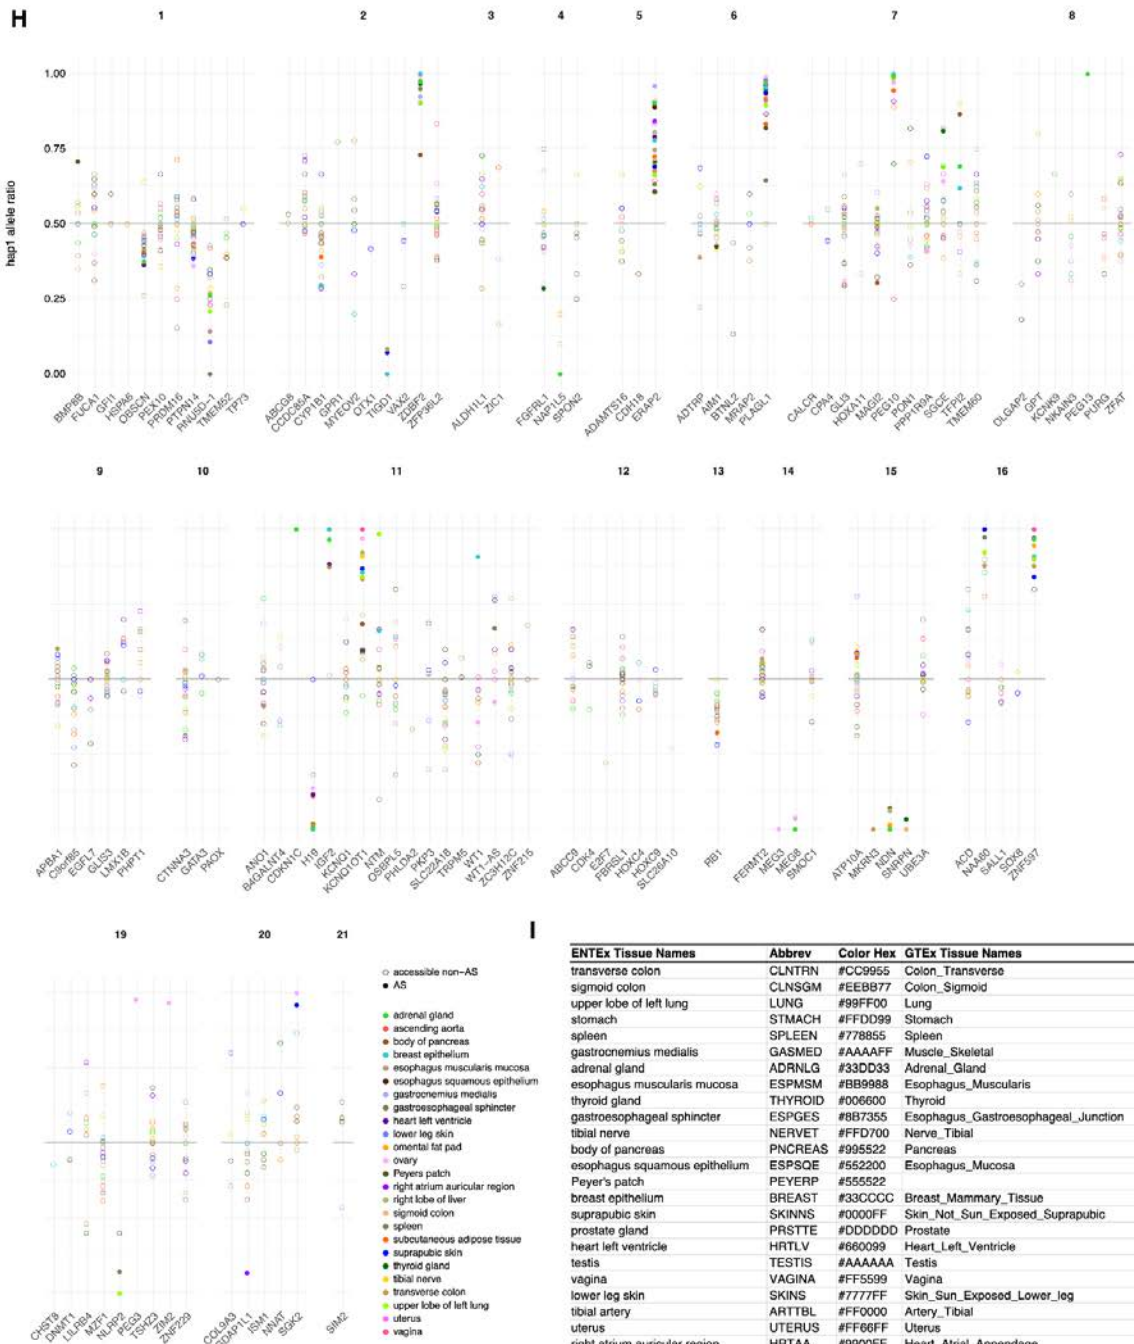

**I**

| ENTEx Tissue Names            | Abbrev  | Color Hex | GTEx Tissue Names                   |
|-------------------------------|---------|-----------|-------------------------------------|
| transverse colon              | CLNTRN  | #CC9955   | Colon_Transverse                    |
| sigmoid colon                 | CLNSGM  | #EEB977   | Colon_Sigmoid                       |
| upper lobe of left lung       | LUNG    | #99FF00   | Lung                                |
| stomach                       | STMACH  | #FFDD99   | Stomach                             |
| spleen                        | SPLEEN  | #778855   | Spleen                              |
| gastrocnemius medialis        | GASMED  | #AAAAFF   | Muscle_Skeletal                     |
| adrenal gland                 | ADRNLG  | #33DD33   | Adrenal_Gland                       |
| esophagus muscularis mucosa   | ESPMSC  | #BB9988   | Esophagus_Muscularis                |
| thyroid gland                 | THYROID | #006600   | Thyroid                             |
| gastroesophageal sphincter    | ESPGES  | #8B7355   | Esophagus_Gastroesophageal_Junction |
| tibial nerve                  | NERVE   | #FFD700   | Nerve_Tibial                        |
| body of pancreas              | PNCREAS | #995522   | Pancreas                            |
| esophagus squamous epithelium | ESPSQE  | #552200   | Esophagus_Mucosa                    |
| Peyer's patch                 | PEYERP  | #555522   |                                     |
| breast epithelium             | BREAST  | #33CCCC   | Breast_Mammary_Tissue               |
| suprapubic skin               | SKINNS  | #0000FF   | Skin_Not_Sun_Exposed_Suprapubic     |
| prostate gland                | PRSTTE  | #DDDDDD   | Prostate                            |
| heart left ventricle          | HRTLVL  | #660099   | Heart_Left_Ventricle                |
| testis                        | TESTIS  | #AAAAAA   | Testis                              |
| vagina                        | VAGINA  | #FF5599   | Vagina                              |
| lower leg skin                | SKINS   | #7777FF   | Skin_Sun_Exposed_Lower_leg          |
| tibial artery                 | ARTTBL  | #FF0000   | Artery_Tibial                       |
| uterus                        | UTERUS  | #FF66FF   | Uterus                              |
| right atrium auricular region | HRTAA   | #9900FF   | Heart_Atrial_Appendage              |
| ovary                         | OVARY   | #FFAFFF   | Ovary                               |
| omental fat pad               | ADPVSC  | #FFA000   | Adipose_Visceral_Omentum            |
| subcutaneous adipose tissue   | ADPSBQ  | #FF6600   | Adipose_Subcutaneous                |
| ascending aorta               | AORTASC | #FF5555   | Artery_Aorta                        |
| right lobe of liver           | LIVER   | #AAB866   | Liver                               |
| thoracic aorta                | AORTTHO | #FF5555   | Artery_Aorta                        |
| coronary artery               | ARTCRN  | #FFAA99   | Artery_Coronary                     |

## **Data S2. Personal genome construction, related to Figure 1, Figure S1, and STAR Methods “Personal Genome” Section**

**(A)** Summary of whole-genome sequencing (WGS). All four individuals were sequenced with regular Illumina short reads, 10x linked reads, and long-reads (PacBio and Oxford Nanopore). Figure shows the sequencing depth and read-length distribution under each platform.

**(B)** Overview of the CrossStitch workflow. SNPs and small indels are called and phased, while unphased SV calls are obtained independently. Then, the phase blocks from the small variants are used to assign haplotypes to heterozygous SVs, and the phased variants are used to construct a phased personal genome assembly based on a high-quality reference sequence.

**(C)** SV phasing with CrossStitch. Phased small variants are used to assign a haplotype to each long read, and SVs are phased by observing the haplotypes of the long reads, which indicate the presence of that variant. In this example, a deletion is phased when all three of the long reads, including that deletion, have small variants that are unique to the orange haplotype.

**(D)** Accession numbers of the WGS data. Accession numbers in parentheses are for VCF files. For individuals 2 and 3 the accession numbers for the personal genome assemblies are ENCFF032RPN and ENCFF836JIE respectively. For individuals 1 and 4 the accession numbers for the personal genome assemblies are ENCFF477YTR and ENCFF132WPC respectively (these correspond to the SVs in Fig. S1D). Earlier assemblies for individuals 1 and 4 were used for some of the analyses in this paper (accessions ENCFF498DUG and ENCFF578XWE). These earlier assemblies for individuals 1 and 4 do not include the long-read Oxford Nanopore sequencing.

**(E)** Phase block length. This figure shows the size of the phase blocks in individual 2 obtained with HapCUT2 when performing small variant phasing with 10x reads only, as well as with a combination of 10x and Hi-C reads. When both data types are used, the contiguity of the phase blocks obtained is very similar to that of GRCh38.

**(F)** Refining novel insertion sequences with Iris. Figure shows the sequence similarity of ONT calls to CCS calls in the Genome-in-a-Bottle sample HG002, used to benchmark the performance of Iris. The sequence similarity between two sequences S and T is calculated as  $\text{edit\_distance}(S, T) / [\max(\text{length}(S), \text{length}(T))]$ .

**(G)** Phase blocks of personal genomes with parental origins. The parental origin of each phase block was determined based on the consistency between the direction of AS gene expression and the direction of known imprinted genes.

**(H)** Consistency of AS expression (ASE) imbalance direction in known imprinted genes across tissue samples (individual 3). Figure shows the fraction of reads preferentially mapping to haplotype 1 (hap1) in known imprinted genes. For most genes, the direction of the significantly imbalanced genes (filled circles) is consistent across samples from different tissues.

**(I)** Information on EN-TE<sub>x</sub> tissues. Table shows the full name, abbreviation, and color code of the EN-TE<sub>x</sub> tissues, as well as their matching relationship with GTEx tissues. This tissue color scheme is used in panel (H), Figure 1, and other main or supplementary figures, unless otherwise noted.

**A**

**ENC-001**  
**G. Medialis**

**ENC-002**  
**G. Medialis**

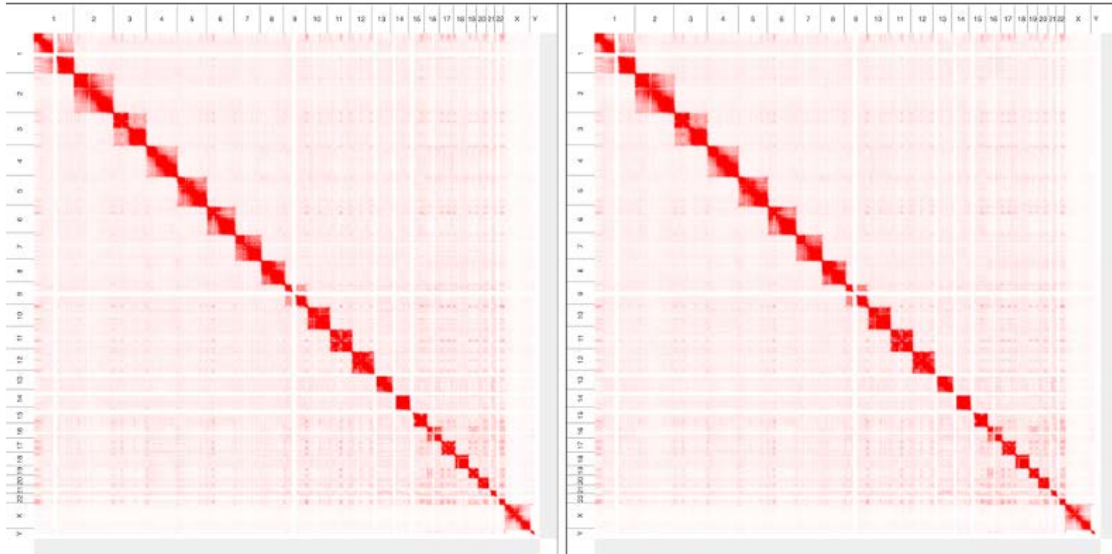

**B**

Number of paired reads (billions)

|                        | ENC-004 | ENC-003 | ENC-001 | ENC-002 |
|------------------------|---------|---------|---------|---------|
| Gastrocnemius medialis | 1.53    | 1.41    | 1.60    | 1.38    |
| Transverse colon       | 1.44    | 1.51    | 1.50    | 2.07    |

Number of contacts (billions)

|                        | ENC-004 | ENC-003 | ENC-001 | ENC-002 |
|------------------------|---------|---------|---------|---------|
| Gastrocnemius medialis | 0.964   | 0.997   | 1.02    | 0.992   |
| Transverse colon       | 1.06    | 1.10    | 1.08    | 0.958   |

C

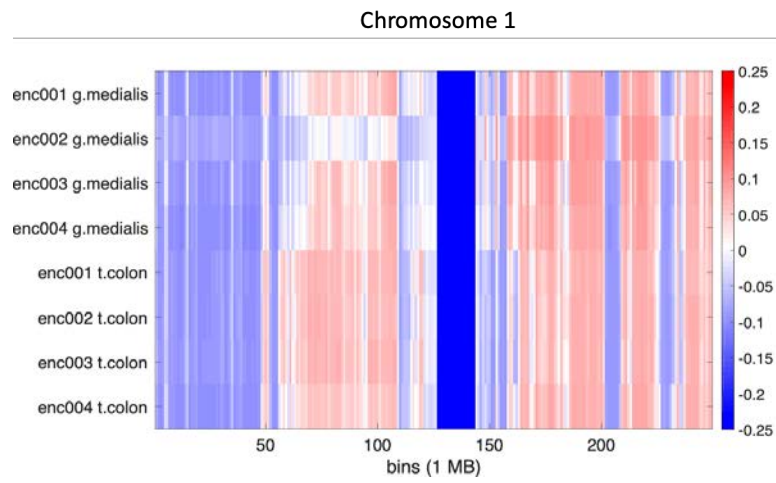

D

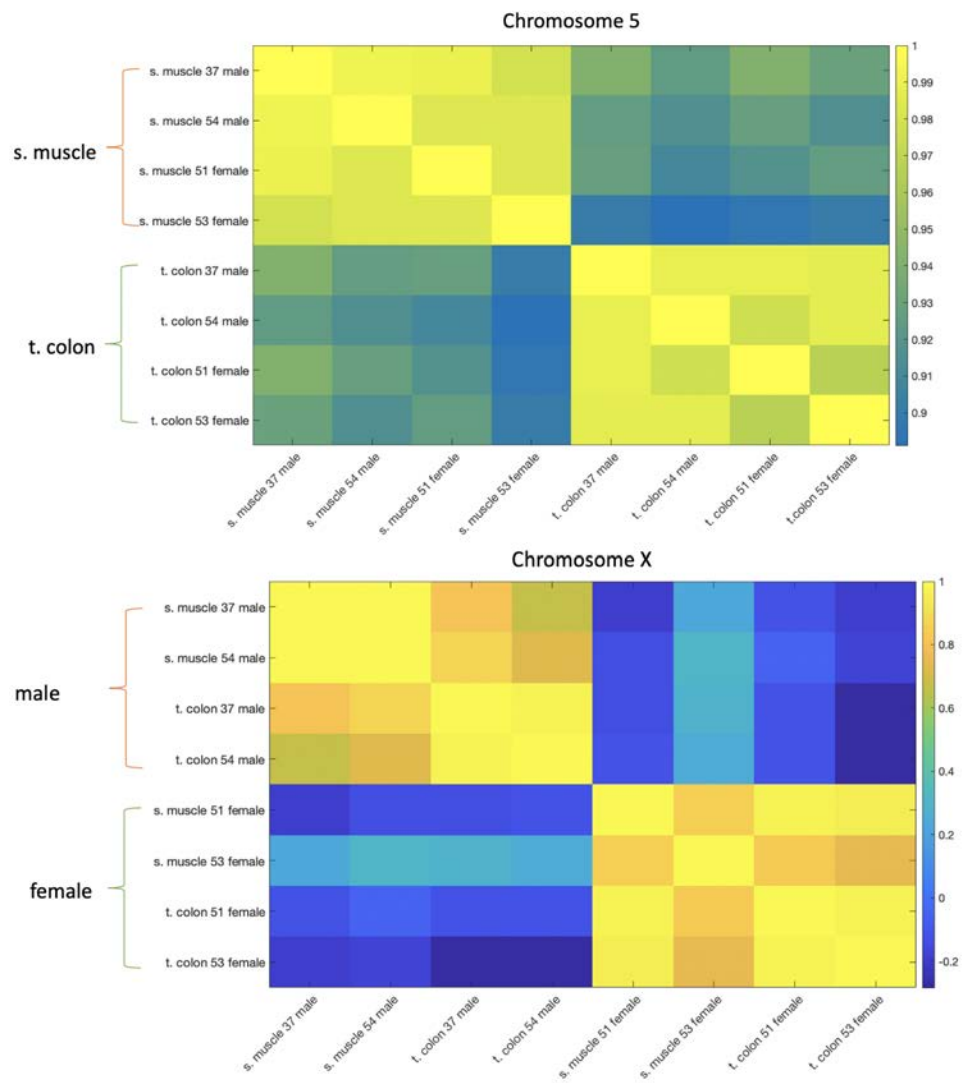



E

| Chrom | Total    | CLNTRN  |         |         |         | GASMED  |         |         |         |
|-------|----------|---------|---------|---------|---------|---------|---------|---------|---------|
|       |          | Indiv 1 | Indiv 2 | Indiv 3 | Indiv 4 | Indiv 1 | Indiv 2 | Indiv 3 | Indiv 4 |
| chr1  | 12397710 | 6788490 | 6857968 | 6640741 | 6263058 | 6128125 | 6218242 | 6188268 | 6282354 |
| chr10 | 3579150  | 2953439 | 2990590 | 2916989 | 2831756 | 2915114 | 2923222 | 2929788 | 2996873 |
| chr11 | 3649051  | 2869655 | 2948299 | 2816640 | 2778830 | 2860206 | 2887171 | 2860242 | 2961438 |
| chr12 | 3552445  | 2969628 | 3041869 | 2919601 | 2856463 | 2939877 | 2980095 | 2940746 | 3026456 |
| chr13 | 2616328  | 1704423 | 1724468 | 1682424 | 1668618 | 1628849 | 1620200 | 1607366 | 1674749 |
| chr14 | 2290870  | 1410898 | 1444375 | 1384357 | 1381694 | 1413111 | 1418356 | 1402899 | 1433712 |
| chr15 | 2079780  | 1119023 | 1143407 | 1119432 | 1094365 | 1107323 | 1136572 | 1128846 | 1138837 |
| chr16 | 1631721  | 945521  | 979481  | 945231  | 922589  | 908303  | 956847  | 932352  | 922697  |
| chr17 | 1386945  | 1028955 | 1055611 | 1029448 | 1009073 | 1014825 | 1056832 | 1042864 | 1050488 |
| chr18 | 1292028  | 1076987 | 1086267 | 1064598 | 1062482 | 1067970 | 1061511 | 1060048 | 1081935 |
| chr19 | 687378   | 560395  | 570534  | 560516  | 559704  | 564088  | 575239  | 571257  | 578818  |
| chr2  | 11729746 | 8394990 | 8525226 | 8309864 | 7938906 | 7840021 | 7789126 | 7833348 | 8259552 |
| chr20 | 830116   | 679685  | 692916  | 663099  | 670959  | 674590  | 680375  | 673769  | 691748  |
| chr21 | 436645   | 207828  | 213035  | 203748  | 205200  | 206996  | 207260  | 206634  | 212110  |
| chr22 | 516636   | 217507  | 220358  | 218031  | 217149  | 216516  | 220675  | 219461  | 220895  |
| chr3  | 7862595  | 6015900 | 6134904 | 5902231 | 5774444 | 5434165 | 5464917 | 5391741 | 5857473 |
| chr4  | 7237110  | 5562209 | 5681942 | 5600166 | 5271711 | 5254951 | 5245142 | 5313566 | 5522909 |
| chr5  | 6590265  | 5129851 | 5233827 | 5049672 | 4852197 | 4903566 | 4859322 | 4876589 | 5108741 |
| chr6  | 5836236  | 4649176 | 4768735 | 4545579 | 4416778 | 4436206 | 4469419 | 4422407 | 4647679 |
| chr7  | 5076891  | 3880470 | 3956534 | 3827833 | 3644663 | 3778164 | 3740318 | 3791757 | 3882221 |
| chr8  | 4212253  | 3506901 | 3567642 | 3465779 | 3373636 | 3384990 | 3372726 | 3383295 | 3507176 |
| chr9  | 3829528  | 1910384 | 1963561 | 1897205 | 1867856 | 1748547 | 1802543 | 1761180 | 1909601 |
| chrX  | 4868760  | 2923158 | 4102701 | 4010558 | 2739157 | 2745686 | 3901268 | 3961831 | 2903581 |
| chrY  | 654940   | 44238   | 224     | 319     | 42376   | 42181   | 636     | 338     | 43792   |

F

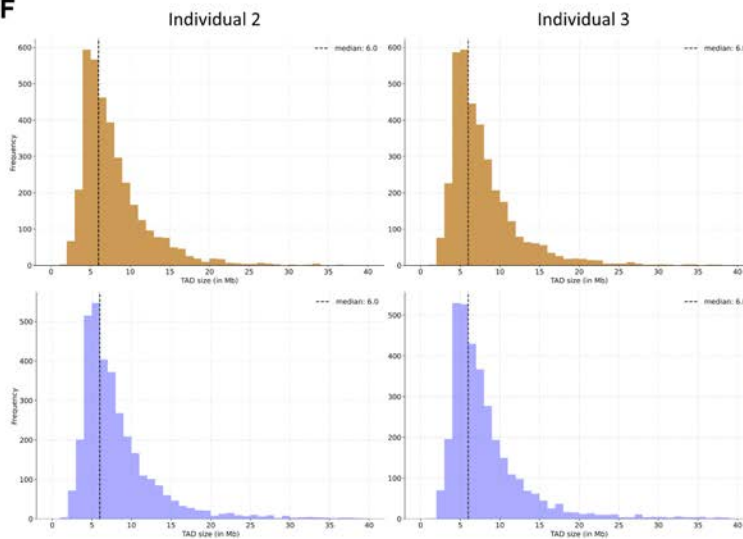

G

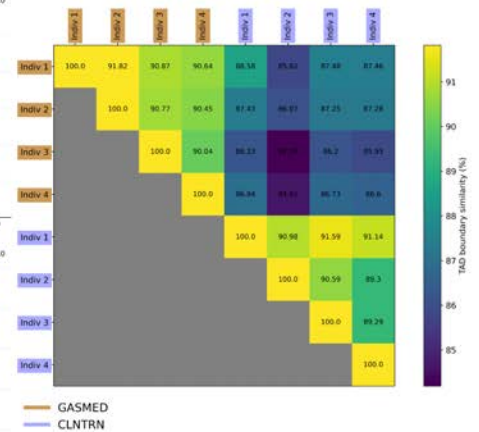

**Data S3. Personal Hi-C, related to STAR Methods “Data Stack” Section**

(A) Example of reference-aligned genome-wide Hi-C maps for the skeletal muscle tissue of two individuals.

(B) Number of paired reads and number of contacts from reference-aligned genome-wide Hi-C contact maps.

**(C)** A/B compartment annotation of four individuals and two tissues for chromosome 1. Red indicates that the 1 MB region is in the A compartment, whereas blue indicates that the region is in the B compartment. The dark blue band corresponds to the centromere.

**(D)** A/B compartments cluster based on tissue in autosomes or sex in chromosome X (chrX). In the figure, 37 male, 54 male, 51 female, and 53 female correspond to individuals 1, 2, 3, and 4, respectively.

**(E)** Summary of significant interactions determined by FitHiC2. The “Total” column presents the total number of intrachromosomal interactions for a given chromosome (e.g., chr1, chr2, ..., chrY).

**(F) - (G)** Comparison of TopDom TAD calls for EN-TE<sub>x</sub> individuals and available Hi-C tissues.

(F) TADs have a similar size distribution and median TAD size across individuals and tissues. The TAD size distribution of individuals 2 (left) and 3 (right) for available Hi-C tissue types gastrocnemius medialis (GASMED - top) and transverse colon (CLNTRN - bottom) are shown.

(G) Pair-wise comparison of TAD calls across all four individuals and available Hi-C tissue types. TAD calls were more similar (i.e., located at the same position along a chromosome) for the same tissues from different individuals than between different tissues.

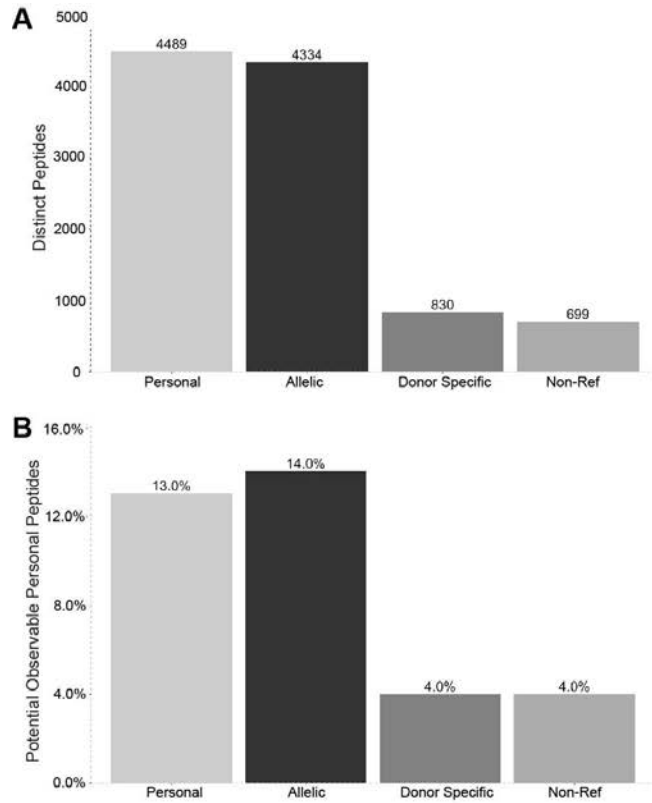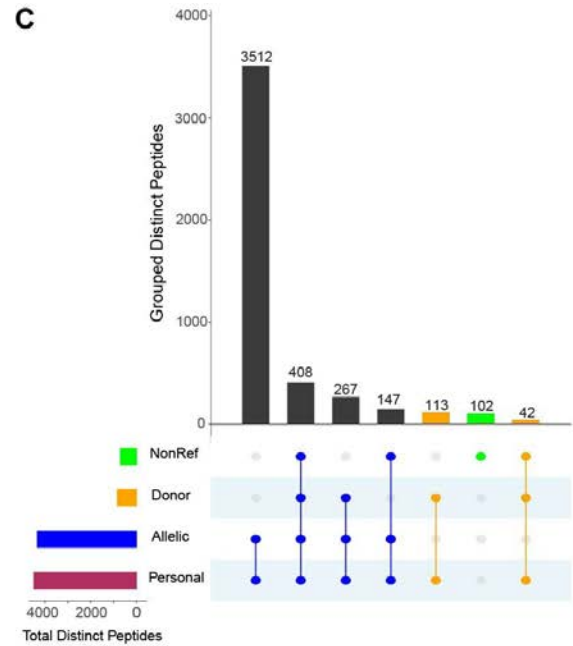

**D**

| Peptide                   | Type              | Gene      | Ensemble id     |
|---------------------------|-------------------|-----------|-----------------|
| VETAGSEPGDTEPJEJGGPGAPEQK | NewModel          | HYOU1     | ENSG00000149428 |
| RPESPGDAEAAAAAPGAPGGR     | NewModel          | SNX25     | ENSG00000109762 |
| SHMMDVQQGSTQDSAJK         | NewModel          | PDIA4     | ENSG00000155660 |
| SQGVQPJPSQGGK             | NewModel          | FAM120A   | ENSG00000048828 |
| ASAAEGVGEPGASAGR          | NewModel (nonATG) | WDR26     | ENSG00000162923 |
| HPKPEVJGSSADGAJJVSJDGJR   | AddedModel        | TNXB      | ENSG00000168477 |
| DSNQGJYJSPGVDJR           | AddedModel        | TNXB      | ENSG00000168477 |
| SSJDTGSSJSTDR             | AddedModel        | IQSEC1    | ENSG00000144711 |
| SGASGASAAPASAAAAJAPSATR   | REFerror          | CENPV     | ENSG00000166582 |
| QTFENQVNR                 | REFerror          | POLR2A    | ENSG00000181222 |
| GGGSCVJCCGDJEATAJGR       | REFerror          | ZNF598    | ENSG00000167962 |
| VJWJDEJQQA/DEANVDEDJR     | REFerror          | IQGAP2    | ENSG00000145703 |
| GPGGVWAAEAJSDAR           | Multiple-Variants | SAA1      | ENSG00000173432 |
| JPQEQQSQJPNPSEASTTFPESHJR | Multiple-Variants | IFI16     | ENSG00000163565 |
| GTJVTVSSASTK              | IG Allelism       |           |                 |
| VTVSSASTK                 | IG Allelism       |           |                 |
| GTTVTVSSASTK              | IG Allelism       |           |                 |
| VDEYJAWQHHTJR             | AltAssembly       | GSTT1     | ENSG00000277656 |
| GQHJSDAFAQVNPJK           | AltAssembly       | GSTT1     | ENSG00000277656 |
| VEAAVGEDJFQEAHEVJJK       | AltAssembly       | GSTT1     | ENSG00000277656 |
| AJEMENSQJCK               | Some Evidence     | HNRNPA0   | ENSG00000177733 |
| AEATESAMER                | Some Evidence     | HNRNPA2B1 | ENSG00000122566 |
| GAGSMATGJGEPVYGJSEDEGESR  | Weak Evidence     | NEDD4L    | ENSG00000049759 |
| GSSPEAGAAAMAESJJJR        | Weak Evidence     | NPLOC4    | ENSG00000182446 |
| AJPGSSMADQAPFDTDVNTJTR    | No Evidence       | FBP1      | ENSG00000165140 |
| DTEQTJYQER                | No Evidence       | LAMB2     | ENSG00000172037 |



#### **Data S4. Personal proteomics, related to STAR Methods “Data Stack” Section**

**(A)** Total number of significantly identified unambiguous personal peptides (filtered for 0.01 posterior error probability and unambiguous gene mapping). The personal category includes all types of personal peptides; allele-specific (“allelic”) peptides are those that are specific to only one allele in at least one individual, donor-specific peptides are those that are completely absent in at least one of the four donors, and non-reference (non-ref) peptides are those that do not match the reference genome. Due to the use of the tandem mass tag (TMT) method, there is a bias towards the most common peptide from among the four donors (usually the reference peptide), as TMT boosts the signal for common peptides.

**(B)** Coverage of all potentially observable personal peptides calculated by an *in silico* tryptic digest. Although *in silico* peptides are filtered for unambiguity and are limited to amino acid lengths of 6-60, there will be a vast number of unobservable peptides due to mass spectrometry (MS)-incompatible charge states and chemical properties.

**(C)** UpSet plot showing the overlap in distinct peptides identified in the MS experiments among the four personal peptide categories. The majority of the peptides are considered personal because they are either donor-specific, AS, or both. There are a small number of non-reference peptides that are neither AS nor donor-specific; these are variant peptides that are common across all donors and alleles.

**(D)** Novel peptides. These are novel non-variant peptides identified with very high confidence that do not match known protein annotations in the GENCODE reference at the time of the experiment. These peptides were manually curated by GENCODE and annotated in combination with orthogonal evidence. Column 1 is the sequence of each novel peptide. Column 2 is the type of annotational outcome: NewModel, a new protein was annotated in the GENCODE reference (nonATG means the new model did not have a canonical ATG TSS); AddedModel, an existing protein annotation was adjusted or the peptide provided additional support for an annotation change already in progress; REFerror, although peptides matched genuine unannotated proteins, an underlying error in the reference genome GRCh38 sequence assembly meant that they could not be added to the current GENCODE annotation; Multiple-Variants, the peptide could be potentially explained by complex variants; IG Allelism, peptides matched in highly variable genomic regions; AltAssembly, peptides matched alternative genome assemblies; Some Evidence, peptides had some orthogonal evidence but fell below the current criteria for annotation of the new protein model; Weak Evidence, very little orthogonal evidence to support change in annotation; No Evidence, no support for a change in annotation. The affected genes and their Ensembl IDs are listed in columns 3 and 4. Additional information, e.g., the number of spectral reads matching the peptide, are provided in ancillary files in the EN-TEX portal.

**A** Precision Mapping Table

|         | Unique to Reference | Unique to Haplotypes | Gain = ((Hap1 U Hap2)-Ref)/Ref |
|---------|---------------------|----------------------|--------------------------------|
| RNAseq  | 0.001               | 0.020                | 0.019                          |
| DNAseq  | 0.002               | 0.045                | 0.045                          |
| CHIPseq | 0.001               | 0.016                | 0.015                          |
| Hi-C    | 0.001               | 0.024                | 0.023                          |

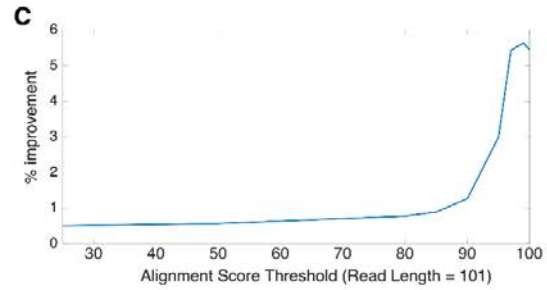

**B**

| <b>DNAseq</b>          | <b>ENC-001 37yo male</b> | <b>ENC-002 54 yo male</b> | <b>ENC-003 53 yo female</b> | <b>ENC-004 51 yo female</b> | <b>Average</b> |
|------------------------|--------------------------|---------------------------|-----------------------------|-----------------------------|----------------|
| Hap1&Hap2 (reads)      | 224,383,498              | 260,499,463               | 243,467,335                 | 266,766,596                 | 244,872,476    |
| Ref (reads)            | 214,959,471              | 249,767,410               | 233,252,112                 | 254,366,883                 | 234,192,822    |
| Ref only (%)           | 0.2                      | 0.2                       | 0.3                         | 0.2                         | 0.2            |
| Hap1&&Hap2↔Ref (reads) | 9,842,890                | 11,359,688                | 10,864,254                  | 12,883,160                  | 11,196,768     |
| Hap1&&Hap2↔Ref (%)     | 4.4                      | 4.4                       | 4.5                         | 4.8                         | 4.5            |
| Improvement            | 0.044                    | 0.043                     | 0.044                       | 0.049                       | 0.045          |
| <b>HIC</b>             | <b>ENC-001 37yo male</b> | <b>ENC-002 54 yo male</b> | <b>ENC-003 53 yo female</b> | <b>ENC-004 51 yo female</b> | <b>Average</b> |
| Hap1&Hap2(reads)       | 185,631,684              | 663,535,209               | 217,727,831                 | 181,462,412                 | 312,089,284    |
| Ref (reads)            | 181,352,202              | 649,127,067               | 212,497,875                 | 177,218,164                 | 305,048,827    |
| Ref only (%)           | 0.1                      | 0.2                       | 0.2                         | 0.1                         | 0.1            |
| Hap1&&Hap2↔Ref (reads) | 4,479,970                | 15,707,837                | 5,583,723                   | 4,436,038                   | 7,551,892      |
| Hap1&&Hap2↔Ref (%)     | 2.4                      | 2.4                       | 2.6                         | 2.4                         | 2.4            |
| Improvement            | 0.024                    | 0.022                     | 0.025                       | 0.024                       | 0.024          |
| <b>CHIPseq</b>         | <b>ENC-001 37yo male</b> | <b>ENC-002 54 yo male</b> | <b>ENC-003 53 yo female</b> | <b>ENC-004 51 yo female</b> | <b>Average</b> |
| Hap1&Hap2(reads)       | 16,523,306               | 30,068,339                | 12,834,649                  | 7,886,359                   | 16,828,163.250 |
| Ref (reads)            | 16,271,254               | 29,616,292                | 12,637,708                  | 7,770,250                   | 16,573,876     |
| Ref only (%)           | 0.1                      | 0.1                       | 0.1                         | 0.1                         | 0.1            |
| Hap1&&Hap2↔Ref (reads) | 267,944                  | 491,961                   | 212,830                     | 122,841                     | 273,894        |
| Hap1&&Hap2↔Ref (%)     | 1.6                      | 1.6                       | 1.7                         | 1.6                         | 1.6            |
| Improvement            | 0.015                    | 0.015                     | 0.016                       | 0.015                       | 0.015          |
| <b>RNAseq</b>          | <b>ENC-001 37yo male</b> | <b>ENC-002 54 yo male</b> | <b>ENC-003 53 yo female</b> | <b>ENC-004 51 yo female</b> | <b>Average</b> |
| Hap.1(reads)           | 14,512,594               | 38,983,875                | 39,631,595                  | 38,983,875                  | 33,027,984.750 |
| Hap.2(reads)           | 14,508,357               | 39,004,820                | 39,660,757                  | 39,004,820                  | 33,044,688.500 |
| Reference (reads)      | 14,252,554               | 38,639,784                | 39,294,659                  | 38,639,784                  | 32,706,695.250 |
| Ref (reads)            | 14,053                   | 40,126                    | 58,062                      | 40,126                      | 38,091.750     |
| Ref only(%)            | 0.1                      | 0.1                       | 0.1                         | 0.1                         | 0.1            |
| Hap1&&Hap2↔Ref (reads) | 383,723                  | 721,245                   | 724,982                     | 721,245                     | 637,798.750    |
| Hap1&&Hap2↔Ref (%)     | 2.6                      | 1.8                       | 1.8                         | 1.8                         | 2.0            |
| Improvement            | 0.025                    | 0.018                     | 0.017                       | 0.018                       | 0.019          |

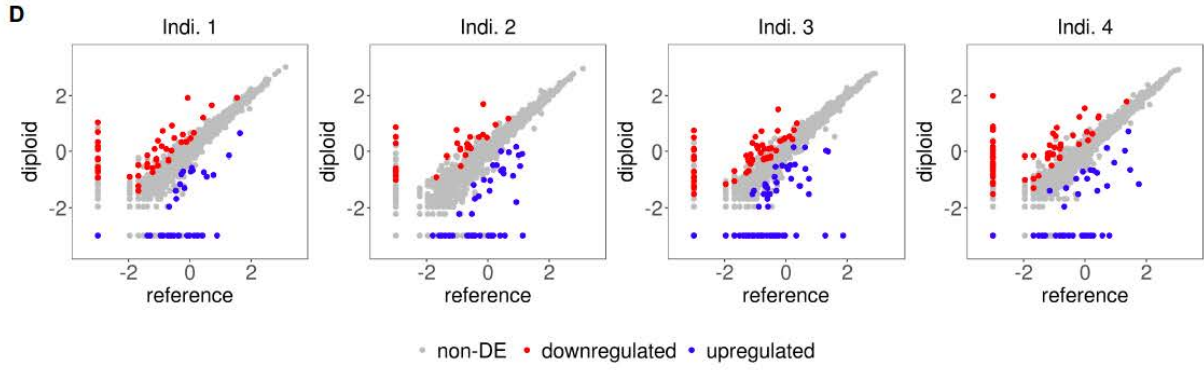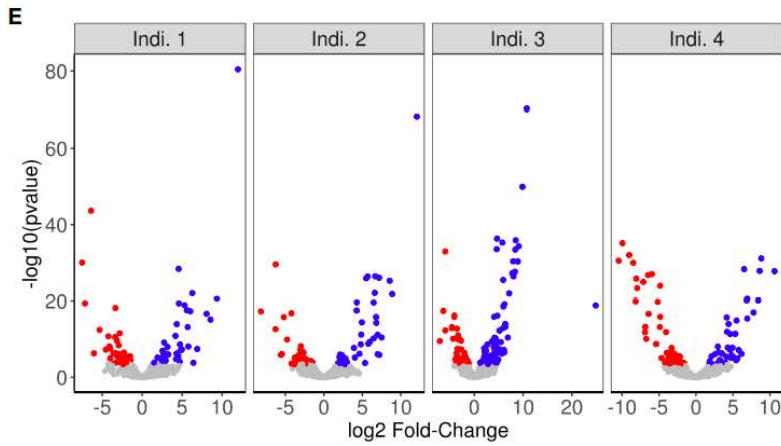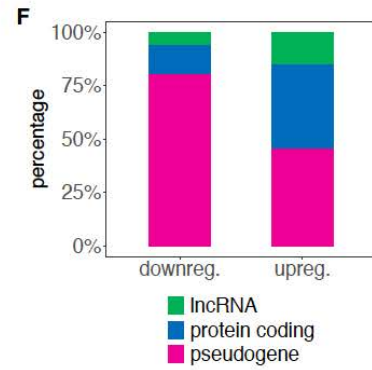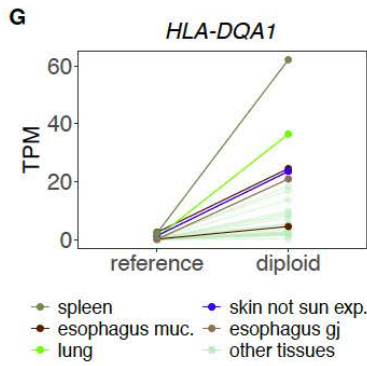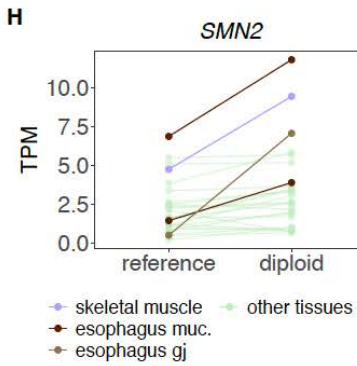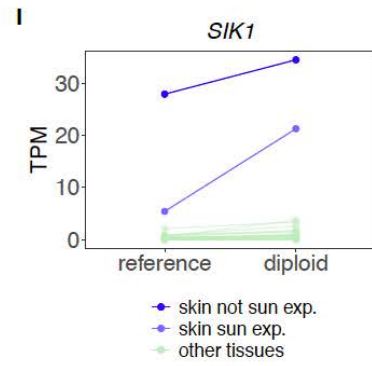

**J**

| Experiment                                | # Downregulated | # Upregulated |
|-------------------------------------------|-----------------|---------------|
| enc001-ENCSR276MMH-adrenal_gland          | 5               | 9             |
| enc001-ENCSR429EWK-thoracic.aorta         | 14              | 18            |
| enc001-ENCSR532LJV-thyroid_gland          | 20              | 12            |
| enc001-ENCSR853BNH-gastrocnemius_medialis | 15              | 16            |
| enc002-ENCSR023ZXN-thyroid_gland          | 26              | 27            |
| enc002-ENCSR94PZB-adrenal_gland           | 6               | 15            |
| enc003-ENCSR504QMK-ENCSR226KML-liver      | 14              | 21            |
| total                                     | 59 (25 new)     | 53 (18 new)   |

| Experiment                          | # Downregulated | # Upregulated |
|-------------------------------------|-----------------|---------------|
| ENCSR000AED/AEF/AEG/AEH/COQ-GM12878 | 43 (34 new)     | 46 (31 new)   |

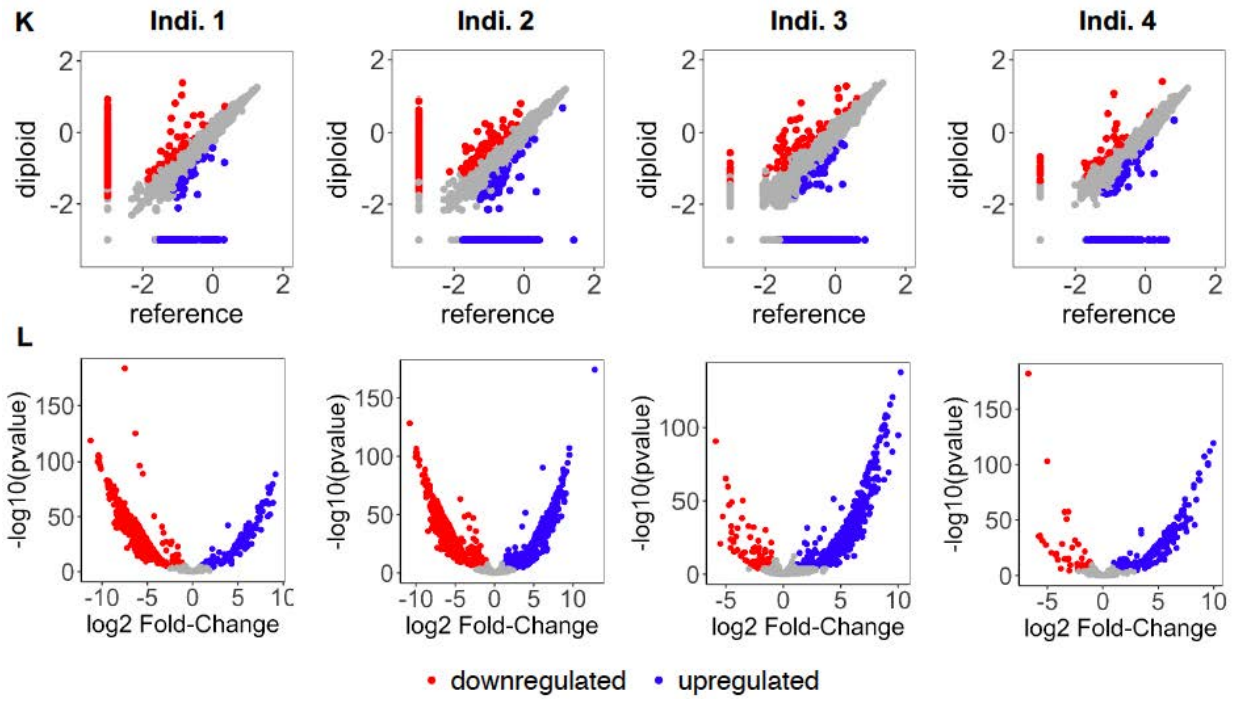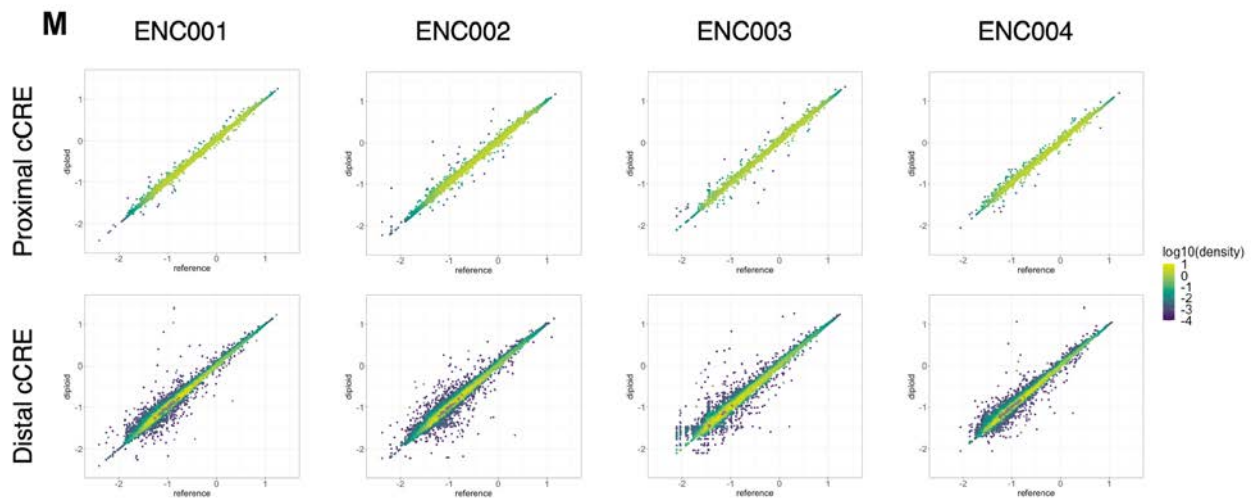

**N** Autochromosomes + Sex chromosomes

| cCRE enc001   | up_in_reference | up_in_diploid | total |
|---------------|-----------------|---------------|-------|
| proximal cCRE | 25              | 110           | 135   |
| distal cCRE   | 156             | 846           | 1002  |
| total         | 181             | 956           | 1137  |

  

| cCRE enc002   | up_in_reference | up_in_diploid | total |
|---------------|-----------------|---------------|-------|
| proximal cCRE | 68              | 116           | 184   |
| distal cCRE   | 470             | 878           | 1348  |
| total         | 538             | 994           | 1532  |

  

| cCRE enc003   | up_in_reference | up_in_diploid | total |
|---------------|-----------------|---------------|-------|
| proximal cCRE | 76              | 9             | 85    |
| distal cCRE   | 559             | 90            | 649   |
| total         | 635             | 99            | 734   |

  

| cCRE enc004   | up_in_reference | up_in_diploid | total |
|---------------|-----------------|---------------|-------|
| proximal cCRE | 37              | 3             | 40    |
| distal cCRE   | 219             | 59            | 278   |
| total         | 256             | 62            | 318   |

Autochromosomes

| cCRE enc001   | up_in_reference | up_in_diploid | total |
|---------------|-----------------|---------------|-------|
| proximal cCRE | 25              | 3             | 28    |
| distal cCRE   | 156             | 66            | 222   |
| total         | 181             | 69            | 250   |

  

| cCRE enc002   | up_in_reference | up_in_diploid | total |
|---------------|-----------------|---------------|-------|
| proximal cCRE | 68              | 10            | 78    |
| distal cCRE   | 468             | 106           | 574   |
| total         | 536             | 116           | 652   |

  

| cCRE enc003   | up_in_reference | up_in_diploid | total |
|---------------|-----------------|---------------|-------|
| proximal cCRE | 68              | 9             | 77    |
| distal cCRE   | 543             | 89            | 632   |
| total         | 611             | 98            | 709   |

  

| cCRE enc004   | up_in_reference | up_in_diploid | total |
|---------------|-----------------|---------------|-------|
| proximal cCRE | 37              | 3             | 78    |
| distal cCRE   | 216             | 56            | 574   |
| total         | 536             | 116           | 312   |

**Data S5. Mapping to personal genomes, related to Figure S2 and STAR Methods “Reference Comparison” Section**

(A) Summary of percentages with precision mapping.

(B) Using DNA from transverse colon tissues, we constructed both haplotype sequences for each individual. Here, we show the summary statistics when comparing the mapping efficiency across different assays (DNA-seq, Hi-C, ChIP-seq, and RNA-seq) between mapping to haplotypes and to the reference genome for each individual. For the mapping of raw reads, stringent filtering criteria were applied (2 mismatches,  $Q_m = 255$  and  $Q > 30$ ). Improvement was calculated as  $((\text{Haplotype1} \cup \text{Haplotype 2}) - \text{Reference}) / \text{Reference}$ .

(C) Change in improvement as a function of alignment score threshold for Hi-C data. More stringent criteria yield greater improvement. However, in the alignment score thresholds that are commonly used in pipelines (e.g., 80-100 for a 101 bp read length), we observed improvements from 1.5% to 4%.

(D) Scatterplots reporting gene expression quantifications obtained after mapping to the reference genome (x-axis) and the diploid genomes (y-axis) for each of the four individuals. Expression values are reported as  $\log_{10}(\text{TPM} + 0.001)$  and correspond to the median value across tissues. Genes that are significantly differentially expressed between mapping to reference and personal genomes are color-coded (DESeq2, adjusted p-value Benjamini-Hochberg  $< 0.1$  and  $|\log_2 \text{FC}| > 1$ ; see STAR Methods “Reference Comparison” Section). Downregulated genes (red) are more expressed when mapped to the personal genome; upregulated genes (blue) are more expressed when mapped to the reference genome. Genes that are not differentially expressed are shown in gray.

(E) Volcano plots reporting, for every gene, the  $\log_2(\text{fold-change})$  and the  $-\log_{10}(\text{p-value})$  obtained from the DGE analysis with DESeq2 in each of the four individuals. The same color schema as in (D) is applied.

(F) Barplot showing the gene type for the union of downregulated ( $n = 100$ ) and upregulated ( $n = 112$ ) genes across the four individuals.



**(G) - (I)** Examples of downregulated genes (gene expression levels correspond to individual 3). *HLA-DQA1* belongs to the HLA class II alpha-chain paralogues. *SMN2* belongs to the SMN complex and plays a role in pre-mRNA splicing. This gene is part of an inverted duplication on chromosome 5q13, a region prone to rearrangements and deletions. Mutations in this gene have been associated with spinal muscular atrophy <sup>1,2</sup>. *SIK1* encodes a member of the salt-inducible kinase family, which has been associated with pigment gene expression <sup>3</sup>. Mutations in this gene have been associated with neurodevelopmental impairments <sup>4,5</sup>.

**(J)** Upper panel: numbers of downregulated and upregulated genes identified by DESeq2 DGE analysis in each experiment with two available replicates. ENCODE experiment identifiers are reported in the first column. Lower panel: numbers of downregulated and upregulated genes identified by DESeq2 DGE analysis in the GM12878 cell line. This analysis employed ten replicates (five polyA+ RNA-seq experiments with two biological replicates each). The ENCODE experiment identifiers are: ENCSR000AED, ENCSR000AEF, ENCSR000AEG, ENCSR000AEH, and ENCSR000COQ.

**(K)** Differential cCRE activity. Scatterplots report H3K27ac activity obtained after mapping to the reference genome (x-axis) and the diploid genomes (y-axis) for each of the four individuals. The H3K27ac signals of the cCREs are log-transformed and correspond to the median value across tissues. cCREs that are significantly differentially marked between mapping to the reference and personal genomes are color-coded (DESeq2, adjusted p-value Benjamini–Hochberg < 0.1 and  $|\log_2 \text{FC}| > 1$ ; see STAR Methods “Reference Comparison” Section). Downregulated cCREs (red) are more marked when mapped to the personal genome; upregulated cCREs (blue) are more marked when mapped to the reference genome. cCREs that are not differentially marked are shown in gray.

**(L)** Volcano plots reporting, for every cCRE, the  $\log_2(\text{fold-change})$  and the  $-\log_{10}(\text{p-value})$  obtained from the DESeq2 analysis in each of the four individuals. The same color schema as in (K) is applied.

**(M)** Scatterplots reporting quantifications of proximal and distal cCRE H3K27ac activity obtained after mapping to the reference genome (x-axis) and the diploid genomes (y-axis) for each of the four individuals. H3K27ac activity values are log-transformed and correspond to the median value across tissues. The density of cCREs in each scatterplot is color-coded. Note that distal cCREs appear to be more differentially marked between the reference and personal genomes, compared to proximal cCREs.

**(N)** The left and right panels show the numbers of differentially marked cCREs (total, proximal, and distal) located on all chromosomes and only auto-chromosomes, respectively.

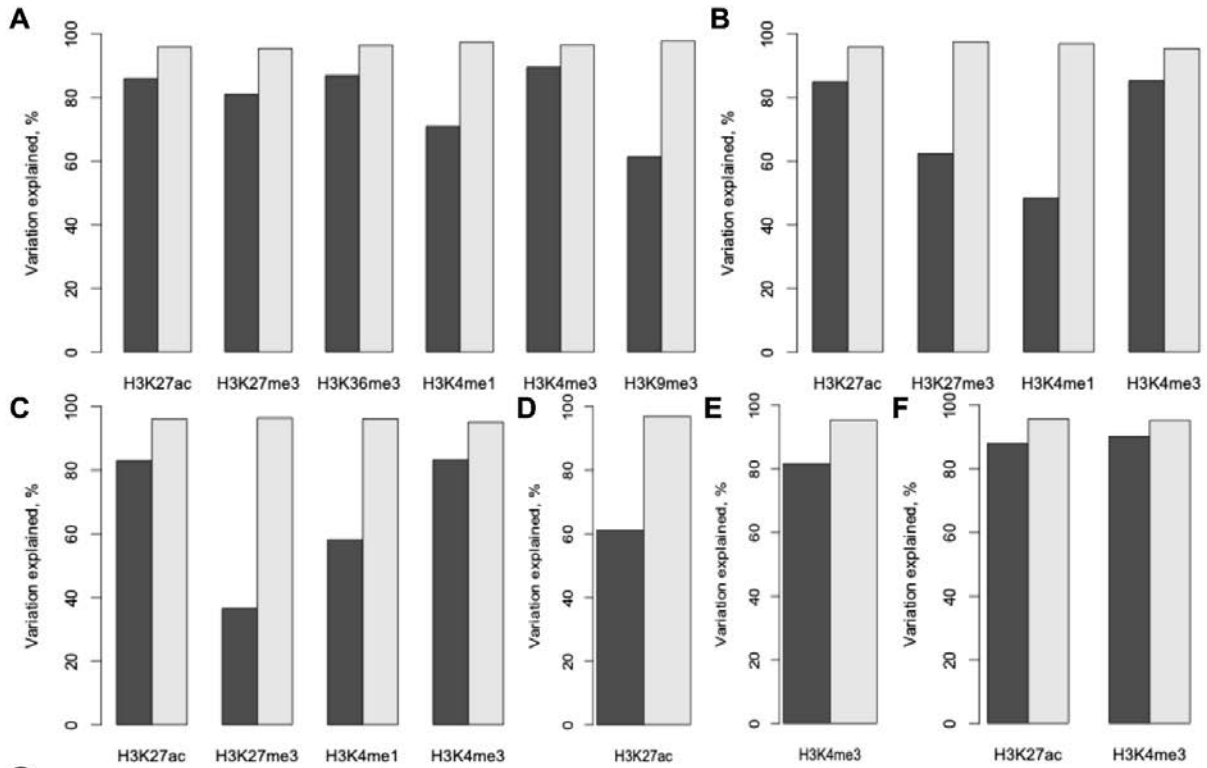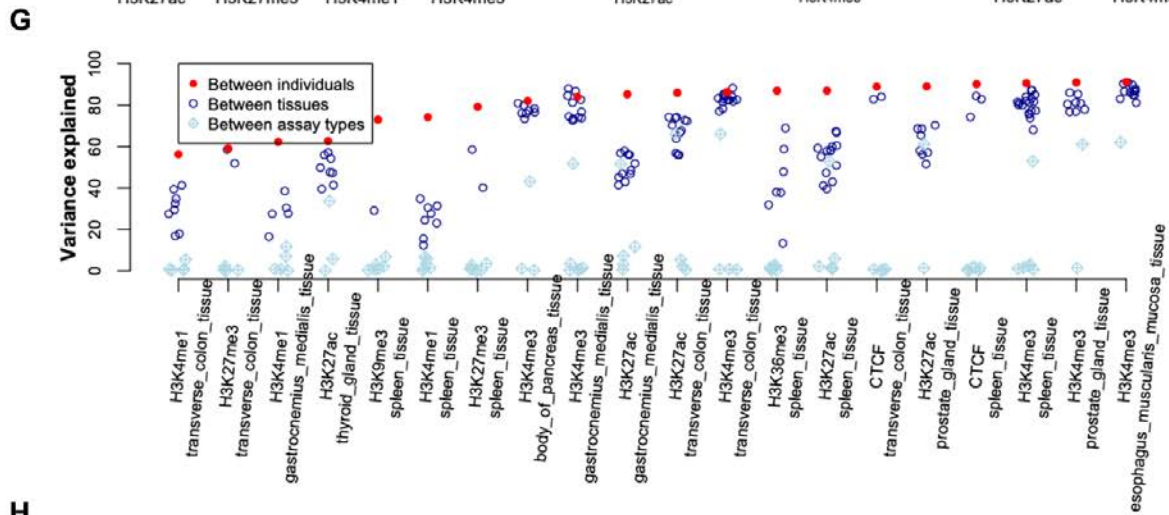

**H**

| Similarity of functional genomic activities of cCREs                     |                                                          |                                                             |                                                                          |                                                                     |
|--------------------------------------------------------------------------|----------------------------------------------------------|-------------------------------------------------------------|--------------------------------------------------------------------------|---------------------------------------------------------------------|
| % of variation explained                                                 | H3K27ac:<br>adrenal_gland_tissue:<br>male_adult_54_years | H3K27ac:<br>body_of_pancreas_tissue:<br>male_adult_37_years | H3K27ac:<br>esophagus_muscularis_mucosa_tissue:<br>female_adult_51_years | H3K27ac:<br>gastrocnemius_medialis_tissue:<br>female_adult_53_years |
| H3K27ac:<br>adrenal_gland_tissue:<br>male_adult_54_years                 | 95.63                                                    | 64.05                                                       | 64.17                                                                    | 52.16                                                               |
| H3K27ac:<br>body_of_pancreas_tissue:<br>male_adult_37_years              | 64.05                                                    | 95.1                                                        | 56.51                                                                    | 44.09                                                               |
| H3K27ac:<br>esophagus_muscularis_mucosa_tissue:<br>female_adult_51_years | 64.17                                                    | 56.51                                                       | 95.35                                                                    | 56.47                                                               |

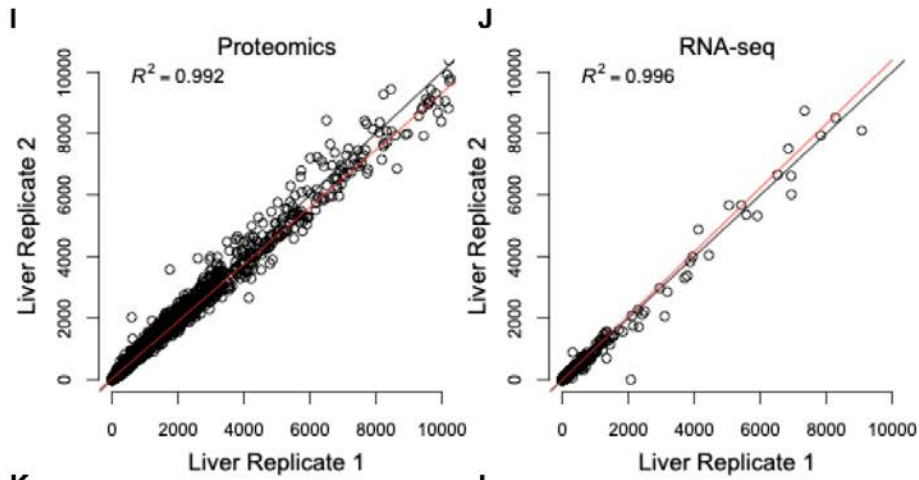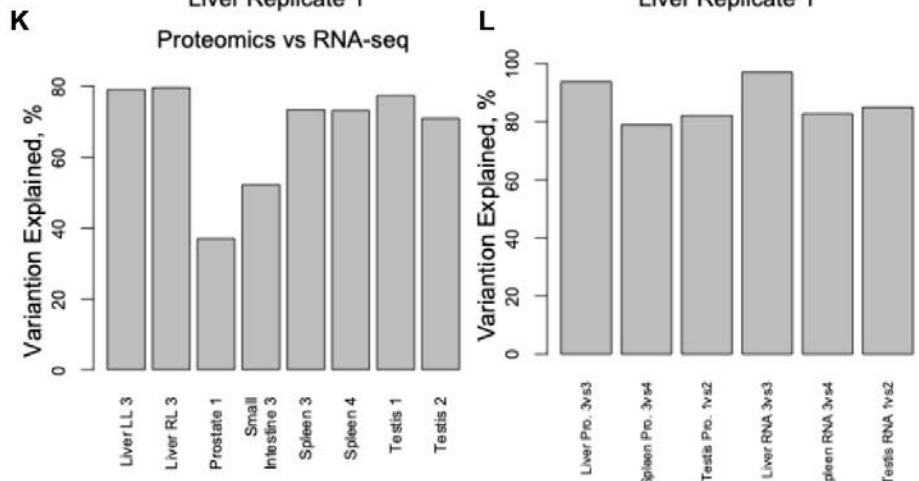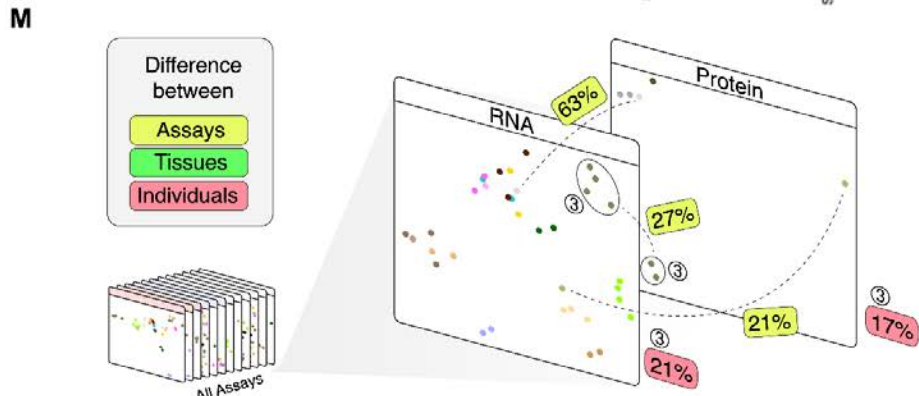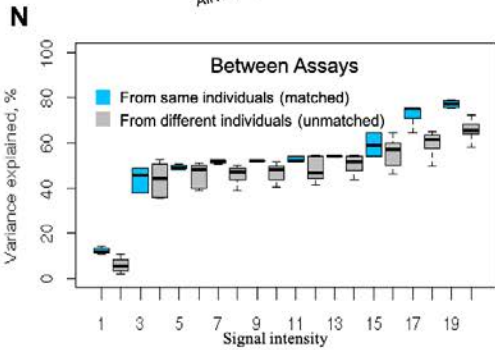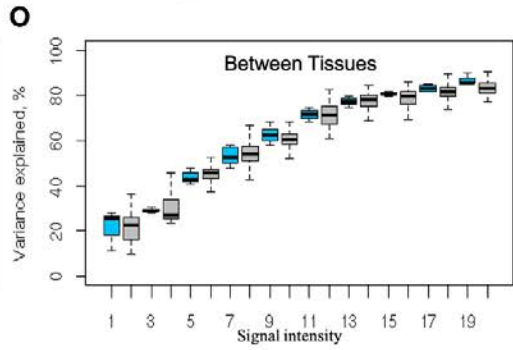



## **Data S6. Variation explained or similarity between experiments, related to Figure S2 and STAR Methods “Variation Analysis” Section**

**(A) - (F)** Variation explained between two experiments corrected by replicates. To calculate the variation explained between experiments (e.g., the two H3K27ac ChIP-seq experiments of the spleens from two individuals), for each experiment we identified the cCREs that drive high variation explained (> 95%) in the replicates of the experiment. The intersecting set of cCREs from the two experiments was used to calculate the variation explained between the two experiments (black bars; e.g., 87% for the two H3K27ac experiments). The average variation explained between the replicates from the two experiments is indicated by the white bars (e.g., 96% for H3K27ac). The results in spleen, transverse colon, gastrocnemius medialis, thyroid gland, pancreas, and prostate gland are shown in (A) - (F).

**(G)** Similarity between the signals of two functional genomic experiments. For each cCRE, the signal of a functional genomic experiment was measured by the average fold-change over control across the cCRE region. For two experiments, linear regression was used for the cCREs with low technical noise between replicates. The variance of one experiment explained by the other is used to indicate the similarity between the experiments across the cCREs.

**(H)** The similarity between all possible pairs of experiments.

**(I) - (L)** Comparison between RNA-seq and proteomics data. **(I)** The normalized protein abundances are highly consistent between replicates. **(J)** This consistency is also observed for the normalized RNA abundances. **(K)** The variation explained between the normalized protein abundances and the normalized RNA abundances varies across tissues, suggesting that for some tissues, protein abundances and RNA abundances have low consistency. LL indicates the left lobe of the liver, and RL indicates the right lobe. The numbers in the labels indicate the donors. **(L)** The variation explained between donors for protein abundances and RNA abundances, which was higher than those in (K). The normalized proteomics and RNA-seq data matrix used for panels (K) and (L) is available in the ancillary files.

**(M)** Consistently analyzing functional genomic data across individuals, tissues, and assays. Similar to Figure S2C, we used JIVE to project the RNA-seq and proteomics data to a 2D space and compare the variation of the data. For example, the difference of RNA-seq data in spleen between different individuals is 21%.

**(N) - (O)** Comparing the explained variances calculated using matched and unmatched data.

**(N)** The explained variance is calculated between two types of histone modifications (between assays) using matched data (blue), i.e., the two assays are generated from the same tissue of an individual, or unmatched data (gray), i.e., the two assays are generated from the same tissues of different individuals. **(O)** The explained variance is calculated between the same histone modifications generated from two different tissues (between tissues). The tissues that are from the same individuals are referred to as matched.

A

## Pipeline overview

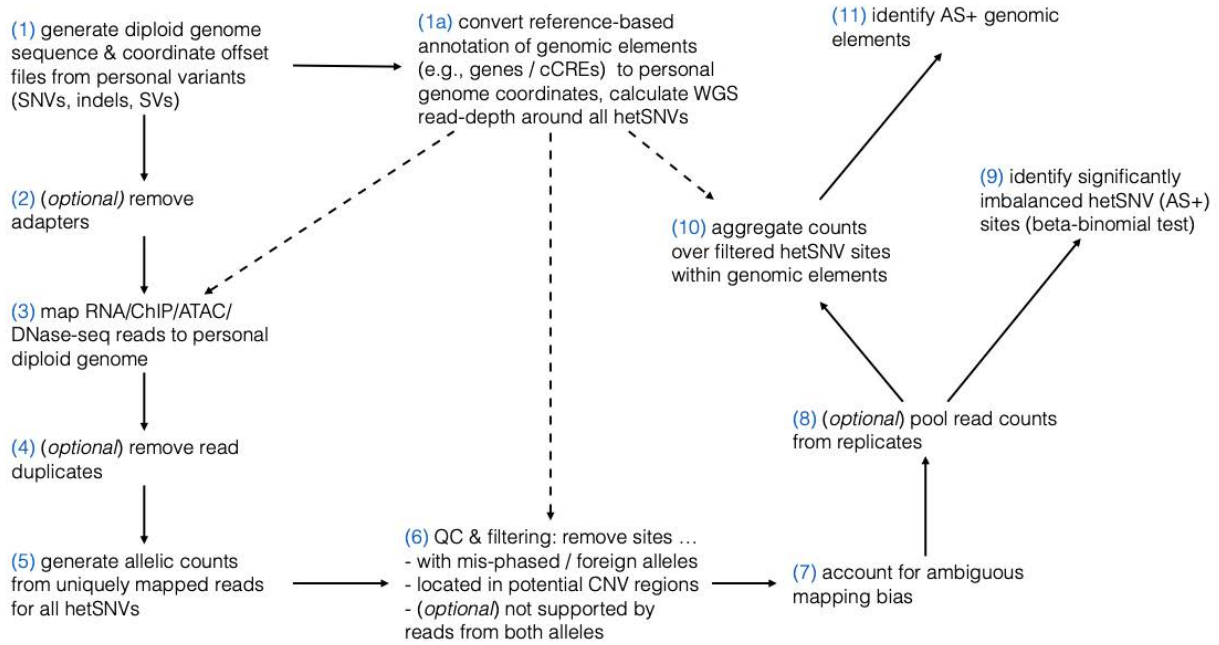

## Mapping (3)

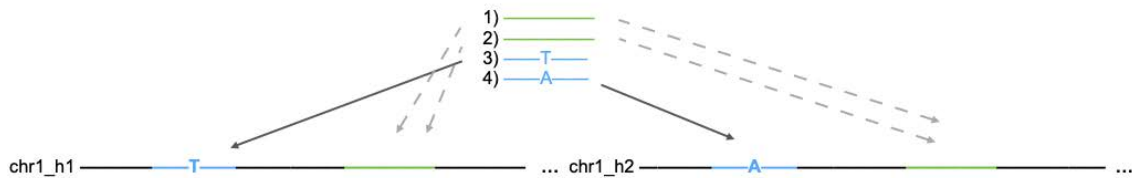

## Ambiguous mapping bias: multi-mapping reads (7)

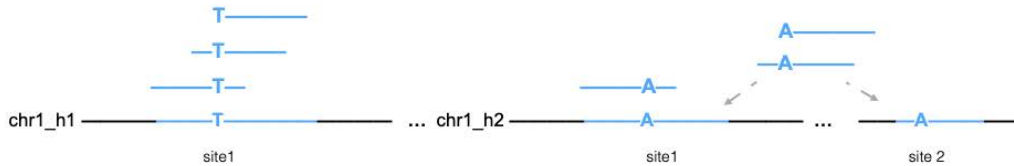

**B**

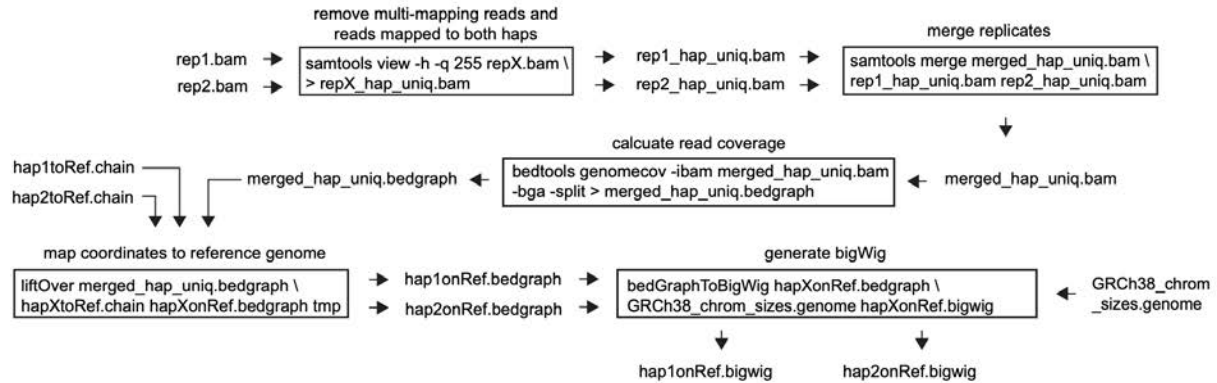

**C**

|                                    |                                                                                                                                                                                                                                                                                                                                                                                                                                                                                                                                                                                                                                                                                      |
|------------------------------------|--------------------------------------------------------------------------------------------------------------------------------------------------------------------------------------------------------------------------------------------------------------------------------------------------------------------------------------------------------------------------------------------------------------------------------------------------------------------------------------------------------------------------------------------------------------------------------------------------------------------------------------------------------------------------------------|
| Fig. S4A                           | RNA: <a href="#">ENCF660SLV</a> , <a href="#">ENCF751QEC</a><br>CTCF: <a href="#">ENCF296YDQ</a> , <a href="#">ENCF255INZ</a><br>H3K27ac: <a href="#">ENCF184LPK</a> , <a href="#">ENCF789APL</a> , <a href="#">ENCF707VEV</a> , <a href="#">ENCF298AKE</a>                                                                                                                                                                                                                                                                                                                                                                                                                          |
| Fig. 2A<br>Data S14H               | ind3 RNA: <a href="#">ENCF281PBY</a> , <a href="#">ENCF760KXM</a><br>ind3 H3K27ac: <a href="#">ENCF699EFW</a> , <a href="#">ENCF075RQB</a><br>ind3 H3K27me3: <a href="#">ENCF888EIC</a> , <a href="#">ENCF595OTK</a> , <a href="#">ENCF011LXD</a> , <a href="#">ENCF626DTV</a><br>ind4 RNA: <a href="#">ENCF711JSM</a> , <a href="#">ENCF355UJC</a> , <a href="#">ENCF415QZI</a> , <a href="#">ENCF912BRJ</a><br>ind4 H3K27ac: <a href="#">ENCF089KJG</a> , <a href="#">ENCF908MFI</a> , <a href="#">ENCF912LCB</a> , <a href="#">ENCF431PJB</a><br>ind4 H3K27me3: <a href="#">ENCF417VAA</a> , <a href="#">ENCF876PUF</a> , <a href="#">ENCF992SRG</a> , <a href="#">ENCF463QBH</a> |
| Fig. 2D<br>Data S17C               | RNA: <a href="#">ENCF719MSG</a> , <a href="#">ENCF120MML</a> , <a href="#">ENCF337ZBN</a> , <a href="#">ENCF481IQE</a><br>H3K27ac: <a href="#">ENCF339ODV</a> , <a href="#">ENCF870TZH</a><br>TF binding clusters: UCSC <a href="#">encRegTfbsClustered</a>                                                                                                                                                                                                                                                                                                                                                                                                                          |
| Fig. 2E<br>Data S17G               | RNA: <a href="#">ENCF038JEE</a> , <a href="#">ENCF897TAN</a><br>H3K27ac: <a href="#">ENCF143SOY</a> , <a href="#">ENCF244ISL</a> , <a href="#">ENCF804MSF</a> , <a href="#">ENCF976BRQ</a><br>TF binding clusters: UCSC <a href="#">encRegTfbsClustered</a>                                                                                                                                                                                                                                                                                                                                                                                                                          |
| Fig. S4C<br>Data S17E              | ind3 RNA: <a href="#">ENCF534JLO</a><br>ind3 H3K27ac: <a href="#">ENCF066DSD</a><br>ind3 CTCF: <a href="#">ENCF417IMY</a><br>ind2 RNA: <a href="#">ENCF232DNA</a><br>ind2 H3K27ac: <a href="#">ENCF439NXI</a><br>ind2 CTCF: <a href="#">ENCF178GEC</a><br>TF binding clusters: UCSC <a href="#">encRegTfbsClustered</a>                                                                                                                                                                                                                                                                                                                                                              |
| Fig. S4B<br>Data S17K<br>Data S17L | ind3 RNA: <a href="#">ENCF216VOH</a><br>ind3 H3K9me3: <a href="#">ENCF423DVX</a><br>ind3 long-read RNA: <a href="#">ENCF185VYD</a><br>ind2 RNA: <a href="#">ENCF187KAR</a><br>ind2 H3K27ac: <a href="#">ENCF095CZX</a><br>ind2 long-read RNA: <a href="#">ENCF912HPY</a>                                                                                                                                                                                                                                                                                                                                                                                                             |
| Data S17A                          | RNA: <a href="#">ENCF326CGI</a> , <a href="#">ENCF663VCC</a><br>H3K27ac: <a href="#">ENCF935UTO</a> , <a href="#">ENCF653PKW</a> , <a href="#">ENCF235IVE</a> , <a href="#">ENCF226YFN</a><br>ATAC: <a href="#">ENCF591BAY</a> , <a href="#">ENCF332SCG</a><br>CTCF: <a href="#">ENCF800GHL</a> , <a href="#">ENCF100YUK</a> , <a href="#">ENCF861WPS</a> , <a href="#">ENCF056JNV</a> , <a href="#">ENCF608GCT</a> , <a href="#">ENCF682AOT</a><br>TF binding clusters: UCSC <a href="#">encRegTfbsClustered</a>                                                                                                                                                                    |
| Data S17H                          | RNA: <a href="#">ENCF122HNW</a> , <a href="#">ENCF069KBE</a> , <a href="#">ENCF483NBR</a> , <a href="#">ENCF226NNE</a><br>H3K27ac: <a href="#">ENCF459LBY</a> , <a href="#">ENCF949SUD</a> , <a href="#">ENCF481TGO</a> , <a href="#">ENCF359AHW</a> , <a href="#">ENCF252NKY</a> , <a href="#">ENCF920PYS</a> , <a href="#">ENCF384MQH</a> , <a href="#">ENCF270YMP</a> , <a href="#">ENCF605JUU</a> , <a href="#">ENCF264CZV</a> , <a href="#">ENCF867PQG</a> , <a href="#">ENCF003LQT</a> , <a href="#">ENCF219DYV</a> , <a href="#">ENCF113KFQ</a><br>TF binding clusters: UCSC <a href="#">encRegTfbsClustered</a>                                                              |
| Data S17I                          | RNA: <a href="#">ENCF411WXY</a> , <a href="#">ENCF543BVT</a> , <a href="#">ENCF072VKD</a> , <a href="#">ENCF484BLA</a> , <a href="#">ENCF086TFZ</a> , <a href="#">ENCF351OAS</a><br>H3K27ac: <a href="#">ENCF214DHU</a> , <a href="#">ENCF209OKJ</a> , <a href="#">ENCF330KKH</a> , <a href="#">ENCF343NQH</a> , <a href="#">ENCF706KXN</a> , <a href="#">ENCF349JBL</a> , <a href="#">ENCF945XBP</a> , <a href="#">ENCF382QHO</a> , <a href="#">ENCF922CDY</a> , <a href="#">ENCF778KZF</a> , <a href="#">ENCF040XEO</a> , <a href="#">ENCF173QJF</a> , <a href="#">ENCF033YTT</a> , <a href="#">ENCF088QFN</a>                                                                     |
| Data S17J                          | ind1 RNA: <a href="#">ENCF751LMQ</a> , <a href="#">ENCF188LMP</a> , <a href="#">ENCF151GUG</a> , <a href="#">ENCF628TMU</a><br>ind1 H3K27ac: <a href="#">ENCF259FFL</a> , <a href="#">ENCF570KZO</a> , <a href="#">ENCF176GZS</a><br>ind4 RNA: <a href="#">ENCF711JSM</a> , <a href="#">ENCF355UJC</a> , <a href="#">ENCF415QZI</a> , <a href="#">ENCF912BRJ</a><br>ind4 H3K27ac: <a href="#">ENCF930NCY</a> , <a href="#">ENCF089KJG</a> , <a href="#">ENCF908MFI</a> , <a href="#">ENCF912LCB</a> , <a href="#">ENCF431PJB</a>                                                                                                                                                     |
| Data S17M                          | ind1 RNA: <a href="#">ENCF150OQH</a> , <a href="#">ENCF460GHU</a> , <a href="#">ENCF661PVB</a> , <a href="#">ENCF152GUK</a><br>ind2 RNA: <a href="#">ENCF900BSQ</a> , <a href="#">ENCF184XUR</a><br>ind3 RNA: <a href="#">ENCF667RSP</a> , <a href="#">ENCF891NXQ</a>                                                                                                                                                                                                                                                                                                                                                                                                                |
| Data S17N                          | ind1 RNA: <a href="#">ENCF060XKP</a><br>ind1 H3K27ac: <a href="#">ENCF665GNN</a><br>ind2 RNA: <a href="#">ENCF251QRT</a><br>ind2 H3K27ac: <a href="#">ENCF439ASM</a>                                                                                                                                                                                                                                                                                                                                                                                                                                                                                                                 |

## **Data S7. AlleleSeq2 and haplotype-specific signal tracks, related to STAR Methods “AS Calling” Section**

**(A)** Workflow of the AlleleSeq2 pipeline. We used genomic variants to construct the sequence and coordinates for each haplotype, and then mapped functional genomics assay reads to each haplotype by using the phased hetSNVs in a read (middle panel). This approach generated BAM files that contain both reads that are mapped uniquely to a region in a haplotype and reads that are mapped to multiple regions (within a haplotype or between two haplotypes, bottom panel). Since it is not possible to unambiguously identify the origin of the reads that multi-map within the haplotypes, we made the conservative assumption that all of these reads originate from the heterozygous locus and, unless the direction of the bias changed towards the opposite allele, we adjusted the allele counts including the multi-mapping reads. We pooled all of the reads for assays with replicates. We identified hetSNVs with allelic imbalance by performing a beta-binomial test on the allelic reads. To determine whether a genomic region has an allelic imbalance in RNA-seq, ChIP-seq, or ATAC-seq, we summed the AS reads from all hetSNVs within the region and performed a beta-binomial test.

**(B)** Workflow for generating haplotype-specific signal tracks. Each box is a command to process files. The input BAM files are generated by step (3) in panel (A), containing reads that are uniquely mapped to each haplotype and reads with ambiguous mapping. The first box removes the reads with ambiguous mapping. In this example, the assay has two replicates; therefore, we merge the two BAM files of unique reads (box 2). If an assay has no replicates, then we skip the “merge replicates” step. The read coverage of each chromosome in each haplotype is then calculated and stored in bedGraph files (box 3). Note that the coordinates of a given genomic region are in the personal genome; therefore, the two haplotypes can give different coordinates even for the same gene. To compare the same region between the two haplotypes, we convert the coordinates in each haplotype from the personal genome to the reference genome (box 4). We also convert the read coverage from bedGraph to bigWig, which can be plotted in the IGV Genome Viewer (box 5). A script that generates the haplotype-specific read coverage from BAM files is provided at <https://github.com/gersteinlab/AlleleSeq2>. An example of the intermediate files (except for the BAM files) in generating haplotype-specific signal tracks is available on the EN-TEEx portal.

**(C)** Data used to generate signal tracks. Data in blue are given as the accession numbers in the ENCODE portal. TF binding clusters are available via the UCSC Table Browser.

A

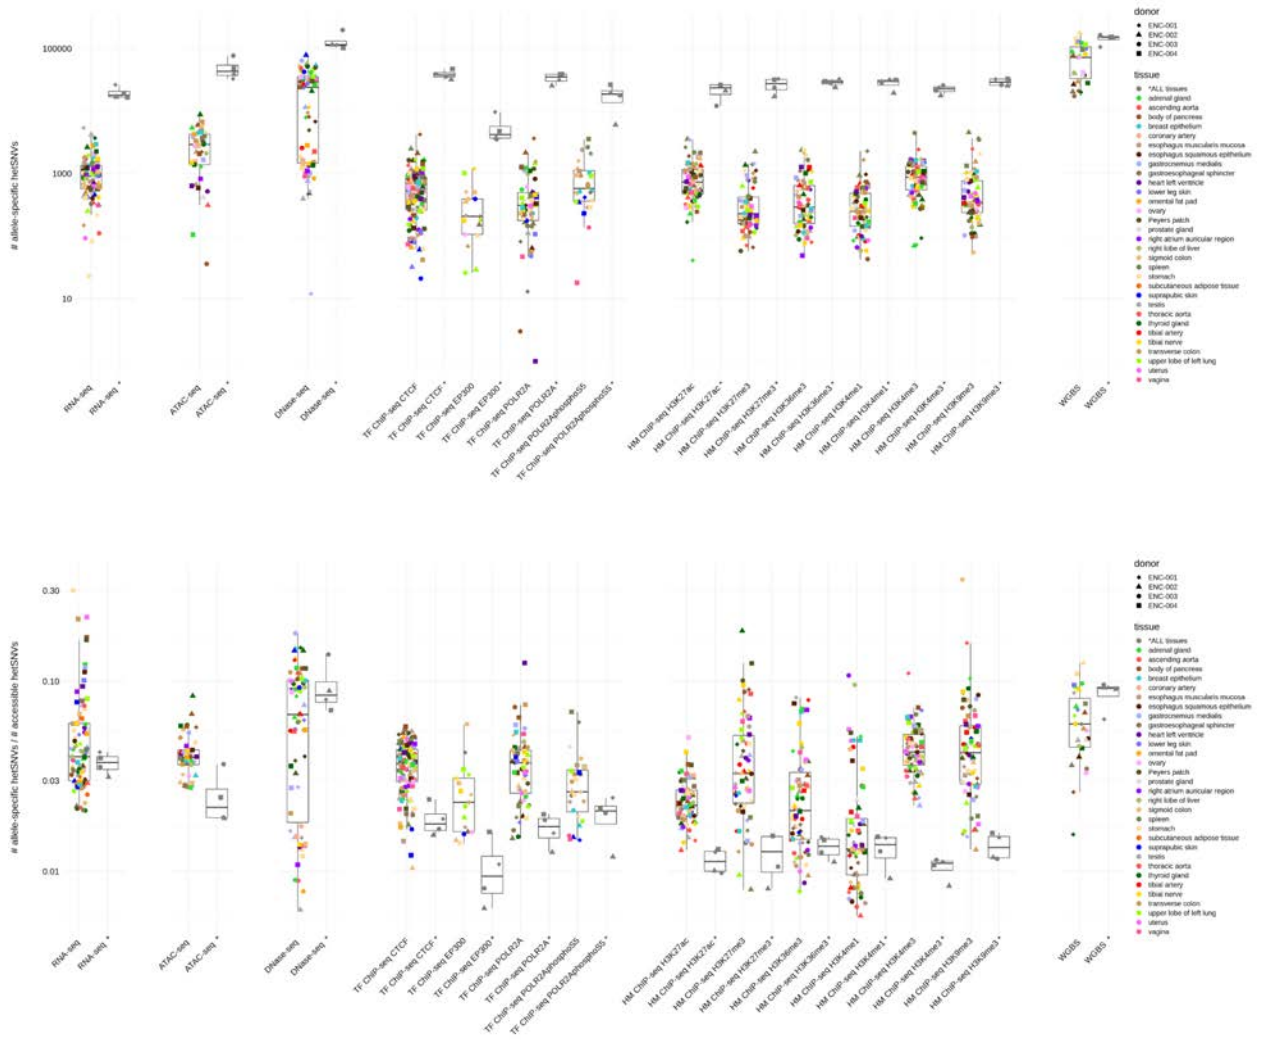

**B**

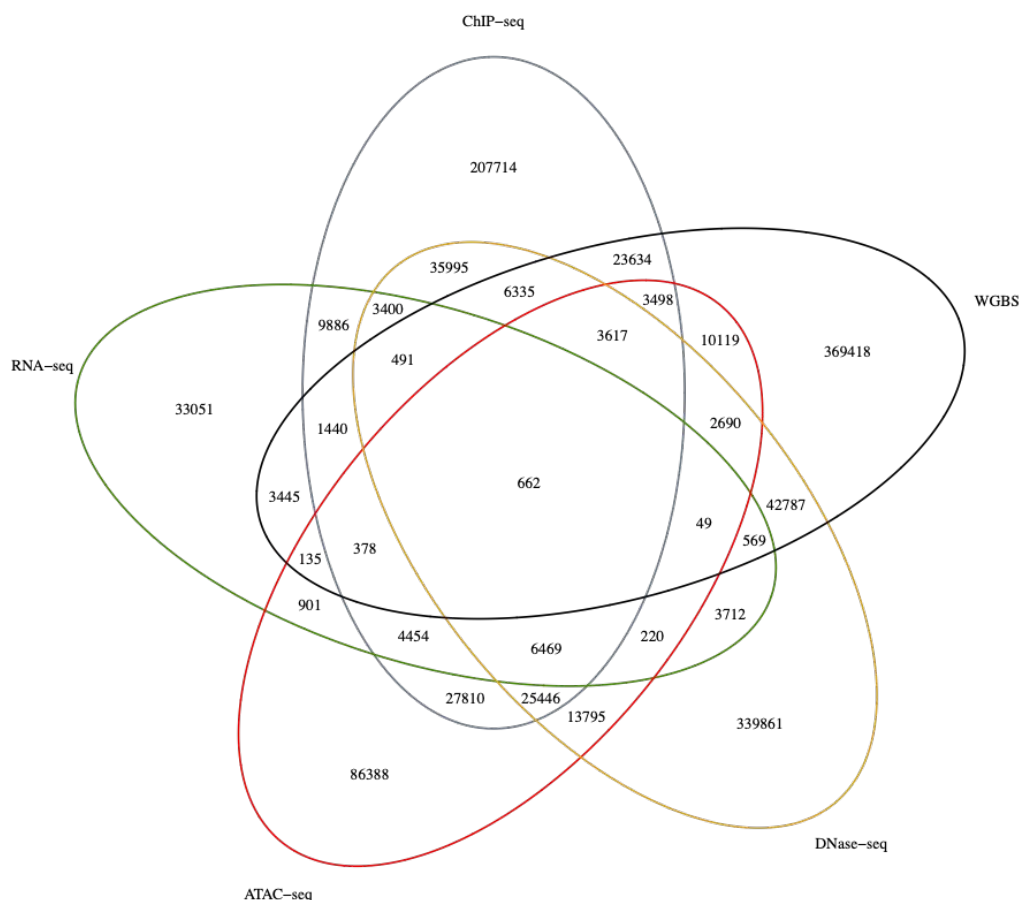

**C**

|                       | all (avg.) variants in 4 individuals | unique variants in 4 individuals | unique/all  |
|-----------------------|--------------------------------------|----------------------------------|-------------|
| hetSNVs               | 9483K (2371K)                        | 6023K                            | 0.64        |
| AS SNVs               | 1459K (365K)                         | 1268K                            | 0.87 (0.93) |
| ASM SNVs              | 516K (129K)                          | 469K                             | 0.91 (0.97) |
| ASE SNVs              | 79K (19.8K)                          | 69K                              | 0.87 (1.0)  |
| ASB SNVs              | 412K (103)                           | 361K                             | 0.88 (0.98) |
| AS accessibility SNVs | 682K (170.5K)                        | 620K                             | 0.91 (0.97) |

**Data S8. AS SNVs, related to Figure S3 and STAR Methods “AS Calling” Section**

(A) Distribution (top) and fraction (bottom) of the number of hetSNVs associated with AS behavior across different EN-TEx donors, tissues, and assays. The fraction is the number of hetSNVs associated with AS behavior relative to the number of accessible hetSNVs. Call sets based on pooled reads from all tissues for each donor and assay are shown in gray. An average of 820 AS events were detected in the RNA/ChIP/ATAC-seq samples (median 517, IQR 251-1,030; ~3.8% of the total number of accessible sites).

**(B)** Venn diagram of hetSNVs showing AS activity in different assays. The numbers are pooled from all four individuals. Heterozygous SNVs that appear in multiple individuals but have the same coordinates are collapsed into one unique heterozygous SNV.

**(C)** The total numbers of AS hetSNVs (i.e., no collapsing; numbers in parentheses are averages for an individual), the numbers of unique AS hetSNVs, and the unique-to-all ratios. For a comparison with the unique-to-all ratio of the AS SNVs, we randomly sampled the same number of heterozygous SNVs from the four individuals and calculated the unique-to-all ratio (numbers in parentheses). The smaller unique-to-all ratios of the AS SNVs suggest that these SNVs tend to be more common than random heterozygous SNVs. AS SNVs are those that show AS activity in any of the assays in (B). AS methylation (ASM) SNVs show AS activity in WGBS data, ASE SNVs in RNA-seq data, AS binding (ASB) SNVs in ChIP-seq data, and AS accessibility SNVs in ATAC-seq or DNase-seq data.



A

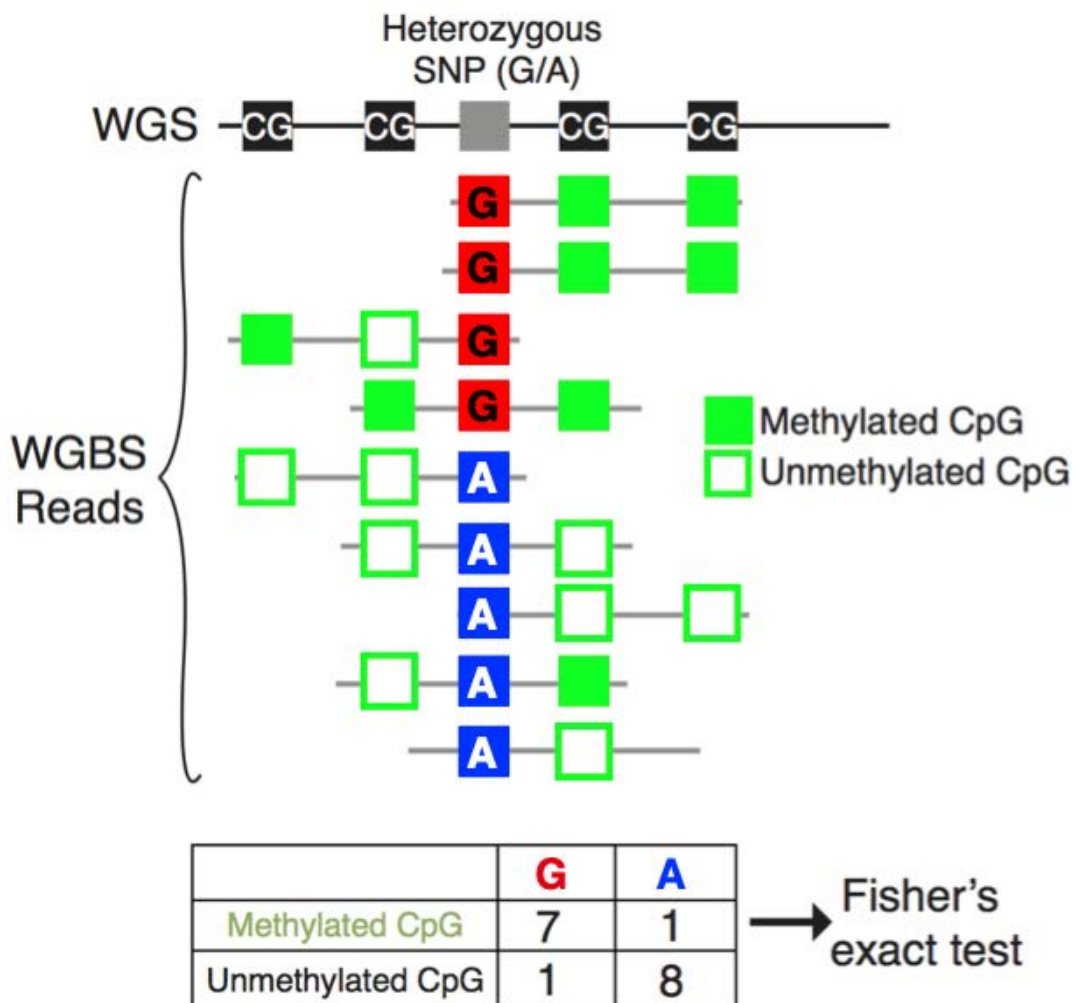

B

| Methylation                                                                     | PRDM13/DM11 | MECP2/DM17 | LMBL1/10 | DNAX1 | BCC-GDB18 | SGCF/PC19 | NESTIN/NEST | ENH17/SAH48 | SNP73/SNIP7 | NAP118 | INSIG2/IR11 | RUNXDT1 | RUNX1 | DRAS1 | ZNF21 | ZNF21/PC10 | ELK1/MSI1 | BB1 | FAM50B | PLAGL1/RYR1A1 | TGCR2 | RPPH1 |
|---------------------------------------------------------------------------------|-------------|------------|----------|-------|-----------|-----------|-------------|-------------|-------------|--------|-------------|---------|-------|-------|-------|------------|-----------|-----|--------|---------------|-------|-------|
| AS Methylation                                                                  | 1/1         | 0/1        | 0/1      | 0/1   | 0/1       | 0/1       | 0/1         | 0/1         | 0/1         | 0/1    | 0/1         | 0/1     | 0/1   | 0/1   | 0/1   | 0/1        | 0/1       | 0/1 | 0/1    | 0/1           | 0/1   | 0/1   |
| AS Unmethylated                                                                 | 1/1         | 0/1        | 0/1      | 0/1   | 0/1       | 0/1       | 0/1         | 0/1         | 0/1         | 0/1    | 0/1         | 0/1     | 0/1   | 0/1   | 0/1   | 0/1        | 0/1       | 0/1 | 0/1    | 0/1           | 0/1   | 0/1   |
| AS Methylated                                                                   | 1/1         | 0/1        | 0/1      | 0/1   | 0/1       | 0/1       | 0/1         | 0/1         | 0/1         | 0/1    | 0/1         | 0/1     | 0/1   | 0/1   | 0/1   | 0/1        | 0/1       | 0/1 | 0/1    | 0/1           | 0/1   | 0/1   |
| AS Heterozygous                                                                 | 1/1         | 0/1        | 0/1      | 0/1   | 0/1       | 0/1       | 0/1         | 0/1         | 0/1         | 0/1    | 0/1         | 0/1     | 0/1   | 0/1   | 0/1   | 0/1        | 0/1       | 0/1 | 0/1    | 0/1           | 0/1   | 0/1   |
| AS Heterozygous/AS Methylated                                                   | 1/1         | 0/1        | 0/1      | 0/1   | 0/1       | 0/1       | 0/1         | 0/1         | 0/1         | 0/1    | 0/1         | 0/1     | 0/1   | 0/1   | 0/1   | 0/1        | 0/1       | 0/1 | 0/1    | 0/1           | 0/1   | 0/1   |
| AS Heterozygous/AS Unmethylated                                                 | 1/1         | 0/1        | 0/1      | 0/1   | 0/1       | 0/1       | 0/1         | 0/1         | 0/1         | 0/1    | 0/1         | 0/1     | 0/1   | 0/1   | 0/1   | 0/1        | 0/1       | 0/1 | 0/1    | 0/1           | 0/1   | 0/1   |
| AS Heterozygous/AS Heterozygous                                                 | 1/1         | 0/1        | 0/1      | 0/1   | 0/1       | 0/1       | 0/1         | 0/1         | 0/1         | 0/1    | 0/1         | 0/1     | 0/1   | 0/1   | 0/1   | 0/1        | 0/1       | 0/1 | 0/1    | 0/1           | 0/1   | 0/1   |
| AS Heterozygous/AS Heterozygous/AS Methylated                                   | 1/1         | 0/1        | 0/1      | 0/1   | 0/1       | 0/1       | 0/1         | 0/1         | 0/1         | 0/1    | 0/1         | 0/1     | 0/1   | 0/1   | 0/1   | 0/1        | 0/1       | 0/1 | 0/1    | 0/1           | 0/1   | 0/1   |
| AS Heterozygous/AS Heterozygous/AS Unmethylated                                 | 1/1         | 0/1        | 0/1      | 0/1   | 0/1       | 0/1       | 0/1         | 0/1         | 0/1         | 0/1    | 0/1         | 0/1     | 0/1   | 0/1   | 0/1   | 0/1        | 0/1       | 0/1 | 0/1    | 0/1           | 0/1   | 0/1   |
| AS Heterozygous/AS Heterozygous/AS Heterozygous                                 | 1/1         | 0/1        | 0/1      | 0/1   | 0/1       | 0/1       | 0/1         | 0/1         | 0/1         | 0/1    | 0/1         | 0/1     | 0/1   | 0/1   | 0/1   | 0/1        | 0/1       | 0/1 | 0/1    | 0/1           | 0/1   | 0/1   |
| AS Heterozygous/AS Heterozygous/AS Heterozygous/AS Methylated                   | 1/1         | 0/1        | 0/1      | 0/1   | 0/1       | 0/1       | 0/1         | 0/1         | 0/1         | 0/1    | 0/1         | 0/1     | 0/1   | 0/1   | 0/1   | 0/1        | 0/1       | 0/1 | 0/1    | 0/1           | 0/1   | 0/1   |
| AS Heterozygous/AS Heterozygous/AS Heterozygous/AS Unmethylated                 | 1/1         | 0/1        | 0/1      | 0/1   | 0/1       | 0/1       | 0/1         | 0/1         | 0/1         | 0/1    | 0/1         | 0/1     | 0/1   | 0/1   | 0/1   | 0/1        | 0/1       | 0/1 | 0/1    | 0/1           | 0/1   | 0/1   |
| AS Heterozygous/AS Heterozygous/AS Heterozygous/AS Heterozygous                 | 1/1         | 0/1        | 0/1      | 0/1   | 0/1       | 0/1       | 0/1         | 0/1         | 0/1         | 0/1    | 0/1         | 0/1     | 0/1   | 0/1   | 0/1   | 0/1        | 0/1       | 0/1 | 0/1    | 0/1           | 0/1   | 0/1   |
| AS Heterozygous/AS Heterozygous/AS Heterozygous/AS Heterozygous/AS Methylated   | 1/1         | 0/1        | 0/1      | 0/1   | 0/1       | 0/1       | 0/1         | 0/1         | 0/1         | 0/1    | 0/1         | 0/1     | 0/1   | 0/1   | 0/1   | 0/1        | 0/1       | 0/1 | 0/1    | 0/1           | 0/1   | 0/1   |
| AS Heterozygous/AS Heterozygous/AS Heterozygous/AS Heterozygous/AS Unmethylated | 1/1         | 0/1        | 0/1      | 0/1   | 0/1       | 0/1       | 0/1         | 0/1         | 0/1         | 0/1    | 0/1         | 0/1     | 0/1   | 0/1   | 0/1   | 0/1        | 0/1       | 0/1 | 0/1    | 0/1           | 0/1   | 0/1   |
| AS Heterozygous/AS Heterozygous/AS Heterozygous/AS Heterozygous/AS Heterozygous | 1/1         | 0/1        | 0/1      | 0/1   | 0/1       | 0/1       | 0/1         | 0/1         | 0/1         | 0/1    | 0/1         | 0/1     | 0/1   | 0/1   | 0/1   | 0/1        | 0/1       | 0/1 | 0/1    | 0/1           | 0/1   | 0/1   |

Region not covered  
  ASM in region  
  No ASM in region

**Data S9. Allele specific methylation, related to STAR Methods "AS Calling" Section**  
 (A) Schematic showing how AS methylation is calculated. We can determine ASM by identifying AS methylated CpG sites near tag hetSNVs using the statistical test above. Since methylated cytosines are sequenced differently from unmethylated cytosines, we use a two-by-two



contingency test (Fisher's exact test) in order to identify AS methylated CpGs in the vicinity of a tag hetSNV <sup>6</sup>.

**(B)** ASM calls in known imprinting control regions. Number of ASM calls made out of the total number of accessible hetSNVs that overlap with an imprinting control region (ICR) <sup>7</sup> for each sample. Green cells represent ICRs that overlap with at least one ASM call in that sample. Red cells represent ICRs that overlap with at least one accessible hetSNV. No hetSNVs with a significant imbalance were observed. Yellow cells represent ICRs that did not overlap with any accessible hetSNVs in the sample.

**A**

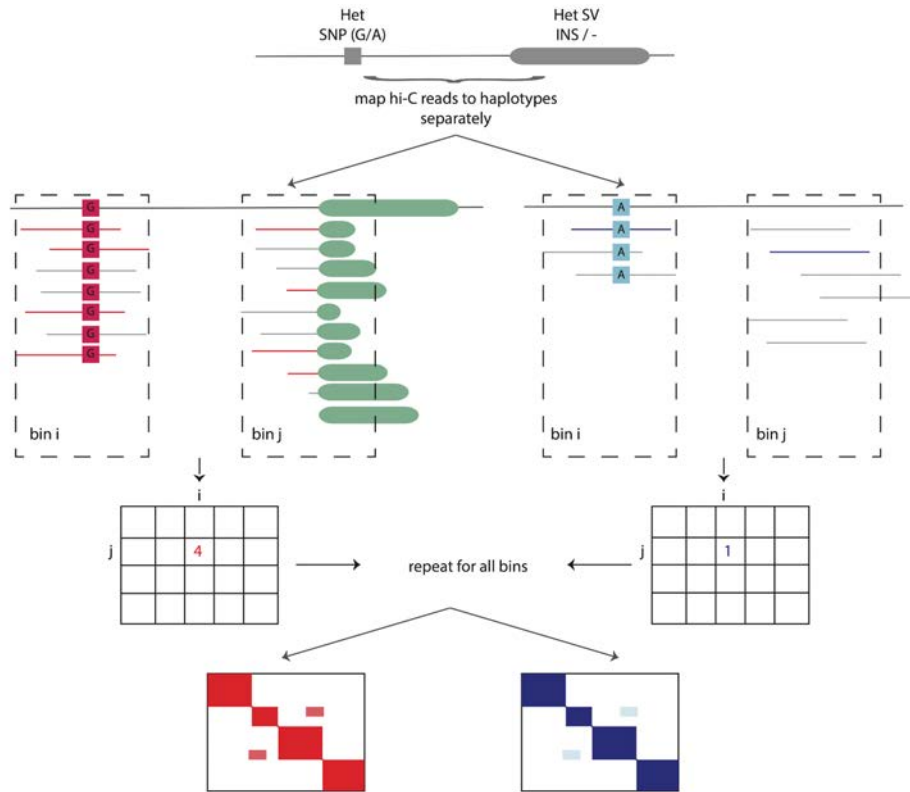

**B**

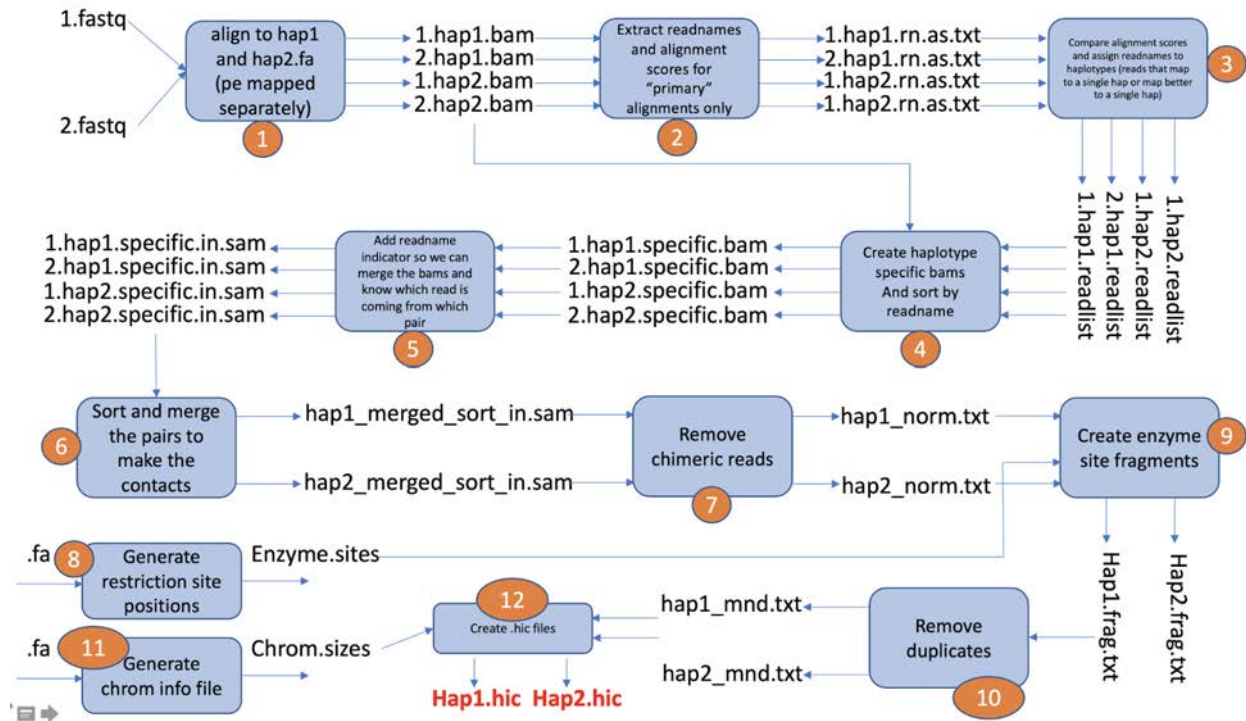

**C**

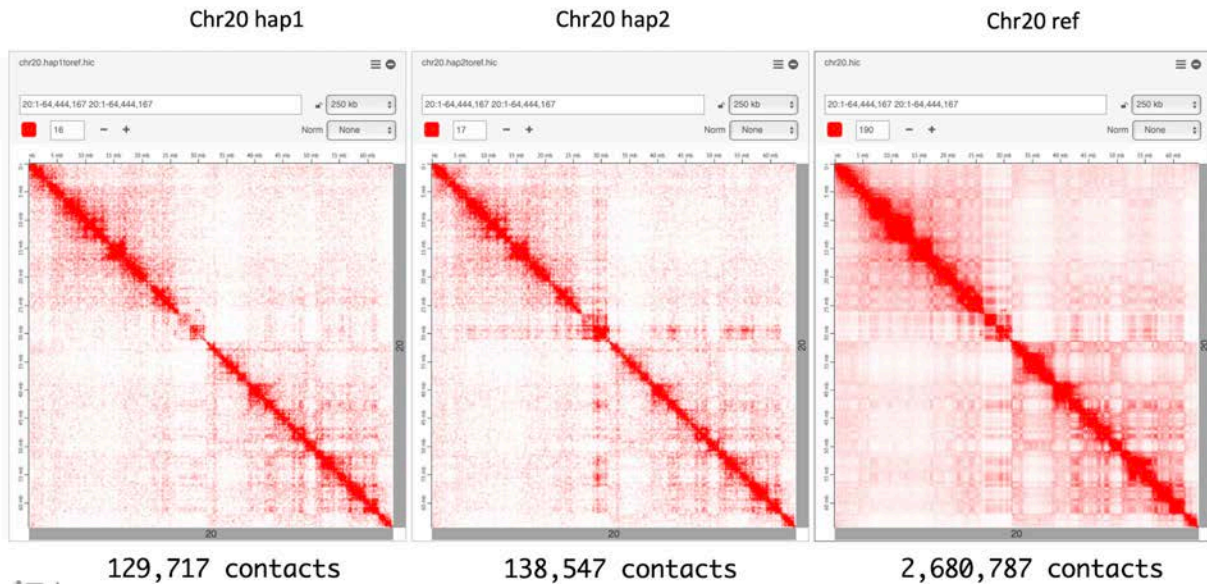

**D**

| Individual/Tissue     | Intra-chromosomal Interactions | Hap1      | Hap2      | Hap1 or Hap2 | Significantly Imbalanced |
|-----------------------|--------------------------------|-----------|-----------|--------------|--------------------------|
| ind1 skeletal muscle  | 39,013,901                     | 4,049,203 | 4,034,602 | 7,041,417    | 577,728                  |
| ind2 skeletal muscle  | 4,405,480                      | 1,117,328 | 1,146,381 | 2,072,227    | 140,317                  |
| ind3 skeletal muscle  | 40,412,585                     | 4,345,533 | 4,359,297 | 7,493,069    | 574,836                  |
| ind4 skeletal muscle  | 41,569,344                     | 4,028,293 | 4,021,800 | 6,983,660    | 523,931                  |
| ind1 transverse colon | 45,534,793                     | 4,942,660 | 4,924,000 | 8,574,917    | 702,953                  |
| ind2 transverse colon | 25,548,308                     | 2,148,267 | 2,151,803 | 3,842,621    | 261,752                  |
| ind3 transverse colon | 43,917,995                     | 4,716,549 | 4,722,227 | 8,118,858    | 609,973                  |
| ind4 transverse colon | 43,406,680                     | 4,343,051 | 4,334,617 | 7,506,125    | 583,468                  |

**Data S10. Haplotype-specific Hi-C, related to STAR Methods “AS Calling” Section**

**(A)** Schematic showing the overall methodology for determining haplotype-specific 3D contact interactions using Hi-C paired-end reads.

**(B)** Workflow for the generation of haplotype-specific Hi-C contact maps.

**(C)** Haplotype-specific contact maps for Chr20 generated using the personal genome coordinates. The third map is the bulk Hi-C contact map of Chr20 generated using the reference genome.

**(D)** Number of Hi-C contacts obtained from haplotype-specific Hi-C contact maps  
Of the average 6,454,111 interactions per sample, 496,859 showed significant AS behavior.

A

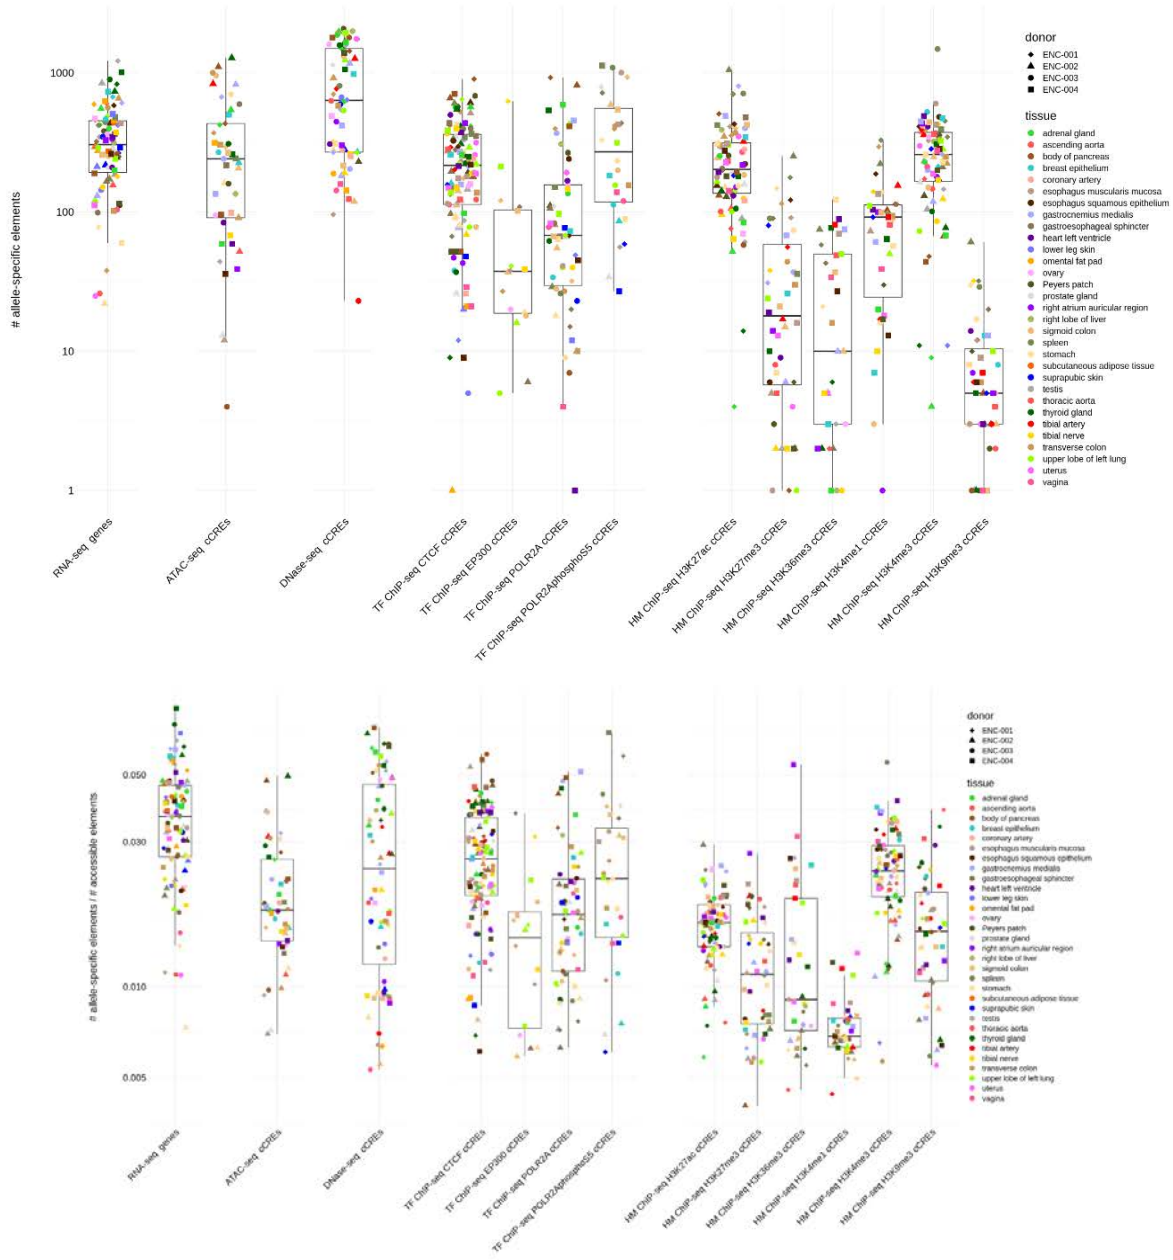

**B**

| Type             | Assay               | Category         | Term                                | Total AS+protein-coding genes           | Category gene count | Percentage (%) | P-Value | FDR     |         |
|------------------|---------------------|------------------|-------------------------------------|-----------------------------------------|---------------------|----------------|---------|---------|---------|
| ASB+             | H3K27ac             | UP_KEYWORDS      | <b>Phosphoprotein</b>               | 2,115                                   | <b>1,011</b>        | <b>47.8</b>    | 7.0E-07 | 3.9E-04 |         |
|                  |                     | UP_KEYWORDS      | Acetylation                         |                                         | 433                 | 20.5           | 1.9E-04 | 5.3E-02 |         |
|                  | H3K4me3             | UP_KEYWORDS      | <b>Phosphoprotein</b>               | 2,312                                   | <b>1,080</b>        | <b>46.7</b>    | 1.0E-06 | 5.5E-04 |         |
|                  |                     | GOTERM_CC_DIRECT | Golgi membrane                      |                                         | 106                 | 4.6            | 4.5E-05 | 3.7E-02 |         |
|                  | H3K27me3            | INTERPRO         | Immunoglobulin-like fold            | 335                                     | 33                  | 9.9            | 2.3E-05 | 1.5E-02 |         |
|                  |                     | UP_KEYWORDS      | Developmental protein               |                                         | 38                  | 11.3           | 7.7E-05 | 2.4E-02 |         |
|                  |                     | KEGG_PATHWAY     | Systemic lupus erythematosus        |                                         | 10                  | 3              | 3.2E-04 | 4.7E-02 |         |
|                  |                     | KEGG_PATHWAY     | Alcoholism                          |                                         | 11                  | 3.3            | 5.2E-04 | 4.7E-02 |         |
|                  | CTCF                | UP_KEYWORDS      | Ubl conjugation                     | 1,227                                   | 144                 | 11.7           | 1.5E-05 | 7.4E-03 |         |
|                  |                     | UP_KEYWORDS      | Isopeptide bond                     |                                         | 97                  | 7.9            | 1.3E-04 | 3.1E-02 |         |
|                  |                     | UP_KEYWORDS      | <b>Phosphoprotein</b>               |                                         | <b>574</b>          | <b>46.8</b>    | 1.9E-04 | 3.1E-02 |         |
|                  |                     | UP_KEYWORDS      | Acetylation                         |                                         | 253                 | 20.6           | 4.2E-04 | 5.1E-02 |         |
|                  | H3K36me3            |                  |                                     | No                                      |                     |                |         |         |         |
|                  | H3K9me3             |                  |                                     |                                         |                     |                |         |         |         |
|                  | H3K4me1             |                  |                                     |                                         |                     |                |         |         |         |
|                  | ATAC                |                  |                                     |                                         |                     |                |         |         |         |
|                  | DNase               |                  |                                     |                                         |                     |                |         |         |         |
|                  | ASE+<br>(top 3,000) | RNA-seq          | UP_KEYWORDS                         | Glycoprotein                            | 2,966               | 902            | 30.4    | 3.8E-35 | 2.0E-32 |
|                  |                     |                  | UP_SEQ_FEATURE                      | glycosylation site:N-linked (GlcNAc...) |                     | 835            | 28.2    | 6.0E-31 | 4.2E-27 |
|                  |                     |                  | UP_SEQ_FEATURE                      | signal peptide                          |                     | 699            | 23.6    | 1.9E-29 | 6.6E-26 |
| UP_KEYWORDS      |                     |                  | Disulfide bond                      | 638                                     |                     | 21.5           | 2.7E-26 | 7.2E-24 |         |
| UP_KEYWORDS      |                     |                  | Signal                              | 782                                     |                     | 26.4           | 5.7E-26 | 1.0E-23 |         |
| UP_KEYWORDS      |                     |                  | Secreted                            | 405                                     |                     | 13.7           | 6.1E-22 | 8.2E-20 |         |
| GOTERM_CC_DIRECT |                     |                  | extracellular exosome               | 629                                     |                     | 21.2           | 1.1E-22 | 9.0E-20 |         |
| UP_KEYWORDS      |                     |                  | <b>Polymorphism</b>                 | <b>2,071</b>                            |                     | <b>69.8</b>    | 2.3E-21 | 2.5E-19 |         |
| UP_SEQ_FEATURE   |                     |                  | disulfide bond                      | 533                                     |                     | 18.0           | 6.9E-21 | 1.6E-17 |         |
| UP_SEQ_FEATURE   |                     |                  | <b>sequence variant</b>             | <b>2,089</b>                            |                     | <b>70.4</b>    | 3.6E-20 | 6.1E-17 |         |
| GOTERM_CC_DIRECT |                     |                  | plasma membrane                     | 760                                     |                     | 25.6           | 1.0E-17 | 4.3E-15 |         |
| UP_KEYWORDS      |                     |                  | Membrane                            | 1,289                                   |                     | 43.5           | 3.3E-16 | 3.0E-14 |         |
| INTERPRO         |                     |                  | Epidermal growth factor-like domain | 94                                      |                     | 3.2            | 1.3E-17 | 4.1E-14 |         |
| GOTERM_CC_DIRECT |                     |                  | extracellular region                | 321                                     |                     | 10.8           | 2.2E-16 | 6.0E-14 |         |
| SMART            |                     |                  | EGF                                 | 82                                      |                     | 2.8            | 8.5E-16 | 4.5E-13 |         |
| UP_KEYWORDS      |                     |                  | EGF-like domain                     | 89                                      |                     | 3.0            | 1.0E-14 | 7.6E-13 |         |
| GOTERM_CC_DIRECT |                     |                  | extracellular matrix                | 103                                     |                     | 3.5            | 4.0E-15 | 8.3E-13 |         |
| UP_KEYWORDS      |                     |                  | Cell membrane                       | 566                                     |                     | 19.1           | 1.7E-14 | 1.1E-12 |         |
| UP_KEYWORDS      |                     |                  | Extracellular matrix                | 87                                      |                     | 2.9            | 6.0E-13 | 3.6E-11 |         |
| UP_KEYWORDS      |                     |                  | Calcium                             | 222                                     |                     | 7.5            | 8.7E-13 | 4.6E-11 |         |

**Data S11. AS elements, related to Figure S3 and STAR Methods “AS Elements” Section**

**(A)** Distribution (top) and fractions (bottom) of the number of genomic elements (genes and cCREs) associated with AS behavior across different EN-TEx donors, tissues, and assays. On average, for each individual and tissue in the RNA/ChIP/ATAC-seq samples, 193 cCREs (median 123, IQR 32-284) and 351 genes (median 205, IQR 193-452) showed a significant AS imbalance per assay.

**(B)** Gene ontology enrichment analysis of AS genes. Functional annotation of EN-TEx AS protein-coding genes detected from different assays. Analysis was performed using DAVID Bioinformatics Resources 6.8. For each assay, the background list includes all protein-coding genes with accessible promoters for ASB or with accessible expressions for ASE. For ASE analysis, since DAVID has a 3,000 gene limit, the top 3,000 mostly ASE protein-coding genes were selected for the enrichment analysis, and the top 20 enriched terms are shown in the table. Terms with the largest number of genes are highlighted in bold.

A

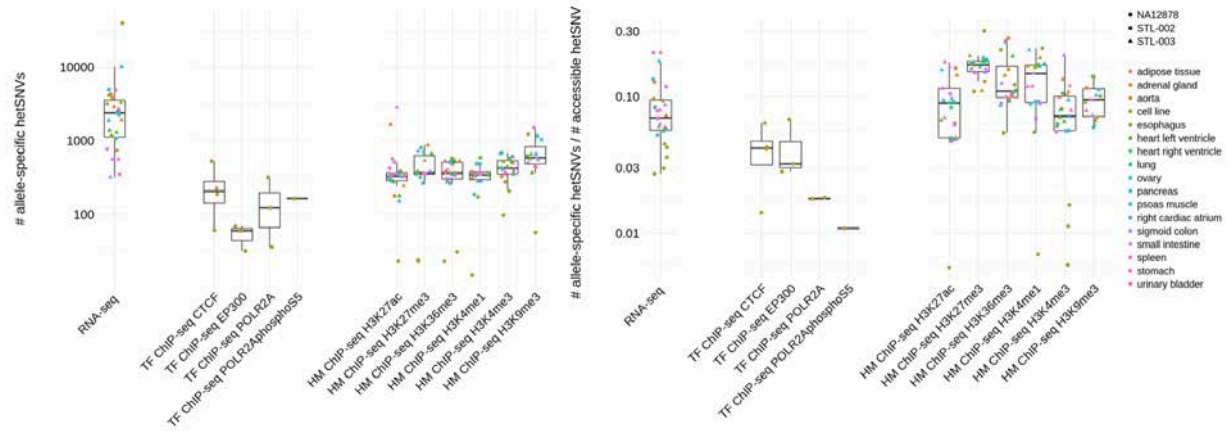



## B

| Donor   | Tissue          | Assay                | Experiment ID | # AS hetSNVs | Donor   | Tissue                | Assay                | Experiment ID | # AS hetSNVs |
|---------|-----------------|----------------------|---------------|--------------|---------|-----------------------|----------------------|---------------|--------------|
| STL-002 | adrenal gland   | HM-ChIP-seq H3K27ac  | ENCSR642HHF   | 178          | STL-003 | adipose tissue        | HM-ChIP-seq H3K27ac  | ENCSR0825HT   | 340          |
| STL-002 | aorta           | HM-ChIP-seq H3K27ac  | ENCSR322TJD   | 350          | STL-003 | adrenal gland         | HM-ChIP-seq H3K27ac  | ENCSR405ESP   | 1681         |
| STL-002 | esophagus       | HM-ChIP-seq H3K27ac  | ENCSR6455YH   | 386          | STL-003 | aorta                 | HM-ChIP-seq H3K27ac  | ENCSR191CFV   | 243          |
| STL-002 | lung            | HM-ChIP-seq H3K27ac  | ENCSR540ADS   | 312          | STL-003 | esophagus             | HM-ChIP-seq H3K27ac  | ENCSR6790VD   | 297          |
| STL-002 | ovary           | HM-ChIP-seq H3K27ac  | ENCSR268JQE   | 286          | STL-003 | heart left ventricle  | HM-ChIP-seq H3K27ac  | ENCSR150QXE   | 179          |
| STL-002 | pancreas        | HM-ChIP-seq H3K27ac  | ENCSR402HFW   | 329          | STL-003 | heart right ventricle | HM-ChIP-seq H3K27ac  | ENCSR928HSI   | 276          |
| STL-002 | psaos muscle    | HM-ChIP-seq H3K27ac  | ENCSR250NHD   | 365          | STL-003 | pancreas              | HM-ChIP-seq H3K27ac  | ENCSR612BWE   | 312          |
| STL-002 | small intestine | HM-ChIP-seq H3K27ac  | ENCSR655XLM   | 512          | STL-003 | psaos muscle          | HM-ChIP-seq H3K27ac  | ENCSR7915SI   | 152          |
| STL-002 | spleen          | HM-ChIP-seq H3K27ac  | ENCSR086XCT   | 353          | STL-003 | right cardiac atrium  | HM-ChIP-seq H3K27ac  | ENCSR074ECR   | 333          |
| STL-002 | stomach         | HM-ChIP-seq H3K27ac  | ENCSR582UTE   | 419          | STL-003 | sigmoid colon         | HM-ChIP-seq H3K27ac  | ENCSR561YSH   | 324          |
| STL-002 | aorta           | HM-ChIP-seq H3K27me3 | ENCSR128VHV   | 373          | STL-003 | small intestine       | HM-ChIP-seq H3K27ac  | ENCSR543CPW   | 2849         |
| STL-002 | esophagus       | HM-ChIP-seq H3K27me3 | ENCSR641RQV   | 353          | STL-003 | spleen                | HM-ChIP-seq H3K27ac  | ENCSR235ZBF   | 324          |
| STL-002 | lung            | HM-ChIP-seq H3K27me3 | ENCSR204NFO   | 803          | STL-003 | stomach               | HM-ChIP-seq H3K27ac  | ENCSR0015HB   | 338          |
| STL-002 | ovary           | HM-ChIP-seq H3K27me3 | ENCSR037SNV   | 701          | STL-003 | urinary bladder       | HM-ChIP-seq H3K27ac  | ENCSR504BKO   | 568          |
| STL-002 | small intestine | HM-ChIP-seq H3K27me3 | ENCSR877PAS   | 357          | STL-003 | adrenal gland         | HM-ChIP-seq H3K27me3 | ENCSR181JFC   | 876          |
| STL-002 | adrenal gland   | HM-ChIP-seq H3K36me3 | ENCSR899MFS   | 478          | STL-003 | aorta                 | HM-ChIP-seq H3K27me3 | ENCSR196PGM   | 537          |
| STL-002 | aorta           | HM-ChIP-seq H3K36me3 | ENCSR989AMI   | 363          | STL-003 | esophagus             | HM-ChIP-seq H3K27me3 | ENCSR088GX8   | 382          |
| STL-002 | esophagus       | HM-ChIP-seq H3K36me3 | ENCSR279MGN   | 580          | STL-003 | heart left ventricle  | HM-ChIP-seq H3K27me3 | ENCSR503QYF   | 664          |
| STL-002 | lung            | HM-ChIP-seq H3K36me3 | ENCSR671NXL   | 264          | STL-003 | heart right ventricle | HM-ChIP-seq H3K27me3 | ENCSR068CQX   | 317          |
| STL-002 | ovary           | HM-ChIP-seq H3K36me3 | ENCSR659MY5   | 518          | STL-003 | pancreas              | HM-ChIP-seq H3K27me3 | ENCSR186QKH   | 352          |
| STL-002 | pancreas        | HM-ChIP-seq H3K36me3 | ENCSR393HBQ   | 507          | STL-003 | psaos muscle          | HM-ChIP-seq H3K27me3 | ENCSR2720SA   | 263          |
| STL-002 | small intestine | HM-ChIP-seq H3K36me3 | ENCSR073YZL   | 304          | STL-003 | right cardiac atrium  | HM-ChIP-seq H3K27me3 | ENCSR972RXX   | 715          |
| STL-002 | spleen          | HM-ChIP-seq H3K36me3 | ENCSR078BHK   | 300          | STL-003 | sigmoid colon         | HM-ChIP-seq H3K27me3 | ENCSR042RIW   | 383          |
| STL-002 | aorta           | HM-ChIP-seq H3K4me1  | ENCSR848TLB   | 376          | STL-003 | spleen                | HM-ChIP-seq H3K27me3 | ENCSR408ONP   | 356          |
| STL-002 | esophagus       | HM-ChIP-seq H3K4me1  | ENCSR4788KA   | 589          | STL-003 | stomach               | HM-ChIP-seq H3K27me3 | ENCSR527BFF   | 352          |
| STL-002 | lung            | HM-ChIP-seq H3K4me1  | ENCSR356ANC   | 187          | STL-003 | adrenal gland         | HM-ChIP-seq H3K36me3 | ENCSR942XCE   | 359          |
| STL-002 | ovary           | HM-ChIP-seq H3K4me1  | ENCSR113AFY   | 488          | STL-003 | aorta                 | HM-ChIP-seq H3K36me3 | ENCSR673JYF   | 530          |
| STL-002 | pancreas        | HM-ChIP-seq H3K4me1  | ENCSR984UHU   | 488          | STL-003 | esophagus             | HM-ChIP-seq H3K36me3 | ENCSR034ZHF   | 363          |
| STL-002 | small intestine | HM-ChIP-seq H3K4me1  | ENCSR538JMW   | 355          | STL-003 | heart left ventricle  | HM-ChIP-seq H3K36me3 | ENCSR434MDA   | 541          |
| STL-002 | spleen          | HM-ChIP-seq H3K4me1  | ENCSR115TSA   | 332          | STL-003 | heart right ventricle | HM-ChIP-seq H3K36me3 | ENCSR1420BQ   | 277          |
| STL-002 | adrenal gland   | HM-ChIP-seq H3K4me3  | ENCSR425NQT   | 571          | STL-003 | pancreas              | HM-ChIP-seq H3K36me3 | ENCSR943JOF   | 345          |
| STL-002 | aorta           | HM-ChIP-seq H3K4me3  | ENCSR960EVO   | 327          | STL-003 | sigmoid colon         | HM-ChIP-seq H3K36me3 | ENCSR445RFF   | 339          |
| STL-002 | esophagus       | HM-ChIP-seq H3K4me3  | ENCSR697GPO   | 443          | STL-003 | spleen                | HM-ChIP-seq H3K36me3 | ENCSR466DU8   | 401          |
| STL-002 | lung            | HM-ChIP-seq H3K4me3  | ENCSR466DZW   | 683          | STL-003 | stomach               | HM-ChIP-seq H3K36me3 | ENCSR552MZH   | 386          |
| STL-002 | ovary           | HM-ChIP-seq H3K4me3  | ENCSR139TLA   | 510          | STL-003 | urinary bladder       | HM-ChIP-seq H3K36me3 | ENCSR449TNC   | 531          |
| STL-002 | pancreas        | HM-ChIP-seq H3K4me3  | ENCSR315LPR   | 423          | STL-003 | adrenal gland         | HM-ChIP-seq H3K4me1  | ENCSR511GOF   | 344          |
| STL-002 | small intestine | HM-ChIP-seq H3K4me3  | ENCSR944QSH   | 397          | STL-003 | aorta                 | HM-ChIP-seq H3K4me1  | ENCSR325VOA   | 309          |
| STL-002 | esophagus       | HM-ChIP-seq H3K9me3  | ENCSR200WOD   | 1225         | STL-003 | esophagus             | HM-ChIP-seq H3K4me1  | ENCSR306ZBD   | 358          |
| STL-002 | lung            | HM-ChIP-seq H3K9me3  | ENCSR728FLA   | 625          | STL-003 | heart left ventricle  | HM-ChIP-seq H3K4me1  | ENCSR111WVGZ  | 173          |
| STL-002 | ovary           | HM-ChIP-seq H3K9me3  | ENCSR956UFV   | 1157         | STL-003 | heart right ventricle | HM-ChIP-seq H3K4me1  | ENCSR076CZA   | 342          |
| STL-002 | pancreas        | HM-ChIP-seq H3K9me3  | ENCSR533HDU   | 1044         | STL-003 | pancreas              | HM-ChIP-seq H3K4me1  | ENCSR449PYI   | 342          |
| STL-002 | small intestine | HM-ChIP-seq H3K9me3  | ENCSR270VNK   | 1506         | STL-003 | psaos muscle          | HM-ChIP-seq H3K4me1  | ENCSR410UJH   | 279          |
| STL-002 | adipose tissue  | RNA-seq              | ENCSR686JJB   | 2440         | STL-003 | right cardiac atrium  | HM-ChIP-seq H3K4me1  | ENCSR671BOA   | 283          |
| STL-002 | adrenal gland   | RNA-seq              | ENCSR146ZKR   | 3838         | STL-003 | sigmoid colon         | HM-ChIP-seq H3K4me1  | ENCSR782OZZ   | 362          |
| STL-002 | esophagus       | RNA-seq              | ENCSR993YQGR  | 3179         | STL-003 | spleen                | HM-ChIP-seq H3K4me1  | ENCSR490YCL   | 374          |
| STL-002 | lung            | RNA-seq              | ENCSR917HC    | 2278         | STL-003 | stomach               | HM-ChIP-seq H3K4me1  | ENCSR257BCD   | 376          |
| STL-002 | ovary           | RNA-seq              | ENCSR725TPW   | 2373         | STL-003 | adrenal gland         | HM-ChIP-seq H3K4me3  | ENCSR234YUJ   | 501          |
| STL-002 | pancreas        | RNA-seq              | ENCSR571BML   | 4929         | STL-003 | aorta                 | HM-ChIP-seq H3K4me3  | ENCSR9578PJ   | 520          |
| STL-002 | psaos muscle    | RNA-seq              | ENCSR502OTI   | 1079         | STL-003 | esophagus             | HM-ChIP-seq H3K4me3  | ENCSR577ILY   | 353          |
| STL-002 | small intestine | RNA-seq              | ENCSR039ICU   | 767          | STL-003 | heart left ventricle  | HM-ChIP-seq H3K4me3  | ENCSR48787B   | 422          |
| STL-002 | spleen          | RNA-seq              | ENCSR510PSL   | 4863         | STL-003 | heart right ventricle | HM-ChIP-seq H3K4me3  | ENCSR791GCO   | 556          |
| STL-002 | stomach         | RNA-seq              | ENCSR980UEY   | 351          | STL-003 | pancreas              | HM-ChIP-seq H3K4me3  | ENCSR747VED   | 354          |
| NA12878 | cell line       | ATAC-seq             | ENCSR095QNB   | 3789         | STL-003 | psaos muscle          | HM-ChIP-seq H3K4me3  | ENCSR949OYZ   | 668          |
| NA12878 | cell line       | ATAC-seq             | ENCSR637XSC   | 19793        | STL-003 | right cardiac atrium  | HM-ChIP-seq H3K4me3  | ENCSR548LZS   | 605          |
| NA12878 | cell line       | HM-ChIP-seq H3K27ac  | ENCSR000AKC   | 23           | STL-003 | sigmoid colon         | HM-ChIP-seq H3K4me3  | ENCSR421HUB   | 398          |
| NA12878 | cell line       | HM-ChIP-seq H3K27me3 | ENCSR000DRX   | 23           | STL-003 | small intestine       | HM-ChIP-seq H3K4me3  | ENCSR792UA    | 401          |
| NA12878 | cell line       | HM-ChIP-seq H3K27me3 | ENCSR000AKD   | 24           | STL-003 | spleen                | HM-ChIP-seq H3K4me3  | ENCSR432KIH   | 371          |
| NA12878 | cell line       | HM-ChIP-seq H3K36me3 | ENCSR000AKE   | 23           | STL-003 | stomach               | HM-ChIP-seq H3K4me3  | ENCSR129NCV   | 351          |
| NA12878 | cell line       | HM-ChIP-seq H3K36me3 | ENCSR000DRW   | 31           | STL-003 | urinary bladder       | HM-ChIP-seq H3K4me3  | ENCSR6320WD   | 607          |
| NA12878 | cell line       | HM-ChIP-seq H3K4me1  | ENCSR000AKF   | 15           | STL-003 | adrenal gland         | HM-ChIP-seq H3K9me3  | ENCSR992VZG   | 459          |
| NA12878 | cell line       | HM-ChIP-seq H3K4me3  | ENCSR057BWO   | 98           | STL-003 | aorta                 | HM-ChIP-seq H3K9me3  | ENCSR065ZNA   | 564          |
| NA12878 | cell line       | HM-ChIP-seq H3K4me3  | ENCSR000AKA   | 207          | STL-003 | esophagus             | HM-ChIP-seq H3K9me3  | ENCSR1510GLE  | 654          |
| NA12878 | cell line       | HM-ChIP-seq H3K4me3  | ENCSR000DXY   | 277          | STL-003 | heart left ventricle  | HM-ChIP-seq H3K9me3  | ENCSR176KNR   | 366          |
| NA12878 | cell line       | HM-ChIP-seq H3K9me3  | ENCSR000AOT   | 57           | STL-003 | pancreas              | HM-ChIP-seq H3K9me3  | ENCSR035QNZ   | 549          |
| NA12878 | cell line       | RNA-seq              | ENCSR000AEC   | 4267         | STL-003 | right cardiac atrium  | HM-ChIP-seq H3K9me3  | ENCSR596BHN   | 661          |
| NA12878 | cell line       | RNA-seq              | ENCSR151NGC   | 734          | STL-003 | sigmoid colon         | HM-ChIP-seq H3K9me3  | ENCSR737NLI   | 507          |
| NA12878 | cell line       | RNA-seq              | ENCSR20PHH    | 1166         | STL-003 | spleen                | HM-ChIP-seq H3K9me3  | ENCSR421FPV   | 587          |
| NA12878 | cell line       | RNA-seq              | ENCSR000AEE   | 4122         | STL-003 | stomach               | HM-ChIP-seq H3K9me3  | ENCSR639RKC   | 438          |
| NA12878 | cell line       | TF-ChIP-seq CTCF     | ENCSR000DRZ   | 188          | STL-003 | adipose tissue        | RNA-seq              | ENCSR741QEH   | 2894         |
| NA12878 | cell line       | TF-ChIP-seq CTCF     | ENCSR000DZN   | 528          | STL-003 | adrenal gland         | RNA-seq              | ENCSR598KJX   | 1918         |
| NA12878 | cell line       | TF-ChIP-seq CTCF     | ENCSR000AKB   | 61           | STL-003 | esophagus             | RNA-seq              | ENCSR102TJN   | 3320         |
| NA12878 | cell line       | TF-ChIP-seq CTCF     | ENCSR000DKV   | 226          | STL-003 | heart left ventricle  | RNA-seq              | ENCSR769LNJ   | 1285         |
| NA12878 | cell line       | TF-ChIP-seq EP300    | ENCSR000BHB   | 32           | STL-003 | heart right ventricle | RNA-seq              | ENCSR433XCV   | 1375         |
| NA12878 | cell line       | TF-ChIP-seq EP300    | ENCSR000DZG   | 69           | STL-003 | pancreas              | RNA-seq              | ENCSR629VMZ   | 1893         |
| NA12878 | cell line       | TF-ChIP-seq EP300    | ENCSR000DZD   | 60           | STL-003 | psaos muscle          | RNA-seq              | ENCSR843HXR   | 10137        |
| NA12878 | cell line       | TF-ChIP-seq POLR2A   | ENCSR000DKT   | 36           | STL-003 | right cardiac atrium  | RNA-seq              | ENCSR675YAS   | 2560         |
| NA12878 | cell line       | TF-ChIP-seq POLR2A   | ENCSR000EAD   | 122          | STL-003 | sigmoid colon         | RNA-seq              | ENCSR999ZCI   | 321          |
| NA12878 | cell line       | TF-ChIP-seq POLR2A   | ENCSR000BGD   | 318          | STL-003 | small intestine       | RNA-seq              | ENCSR719HRO   | 557          |
| NA12878 | cell line       | TF-ChIP-seq POLR2A   | ENCSR000BIF   | 164          | STL-003 | spleen                | RNA-seq              | ENCSR910GOX   | 2674         |
| NA12878 | cell line       | TF-ChIP-seq POLR2A   | ENCSR000BIF   | 164          | STL-003 | stomach               | RNA-seq              | ENCSR721HDG   | 556          |

### Data S12. Construction of a validation dataset from AS events in non-EN-TEX datasets, related to STAR Methods “AS Catalog” Section

(A) Distribution and fraction of the number of hetSNVs associated with AS behavior detected in NA12878 and Roadmap individuals STL002 and STL003.

(B) Datasets used for calling AS events in the Roadmap individuals.

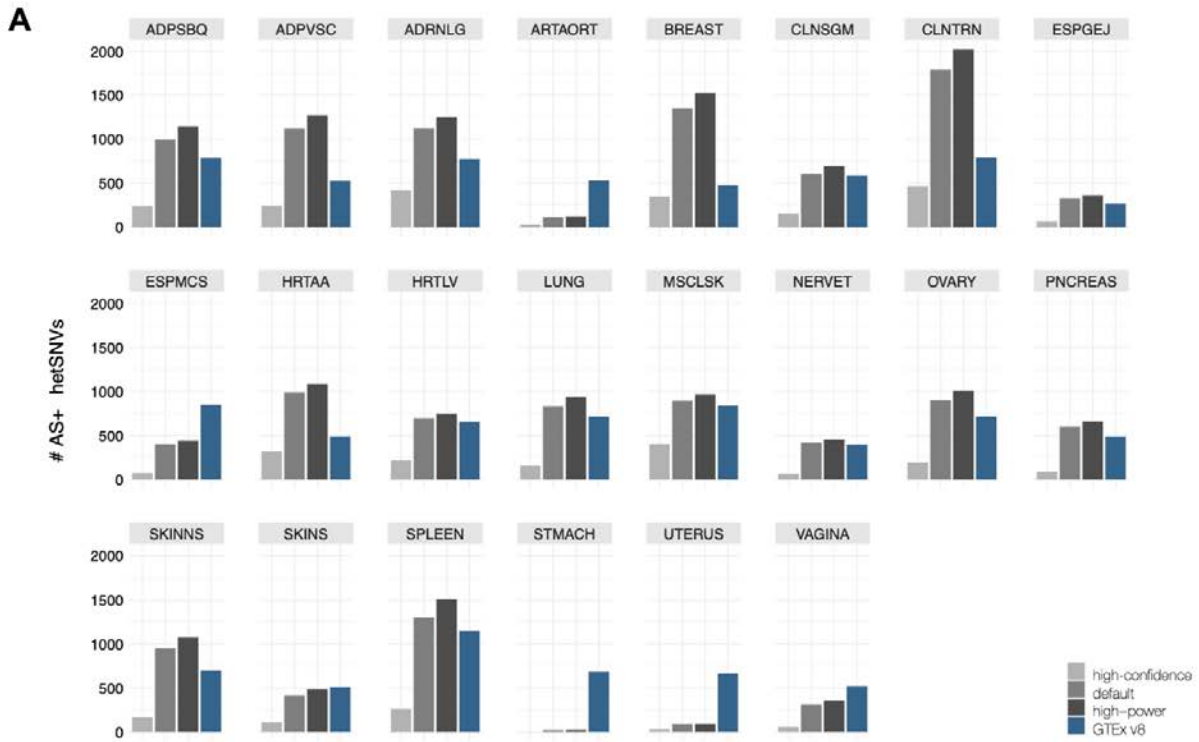

**B** Comparison of high-power ASE calling methods

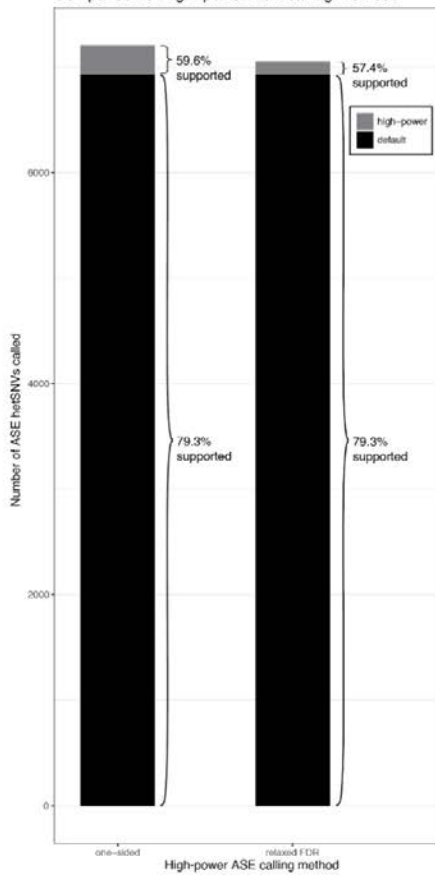

**C** ASE hetSNVs in NA12878 with one-sided calling

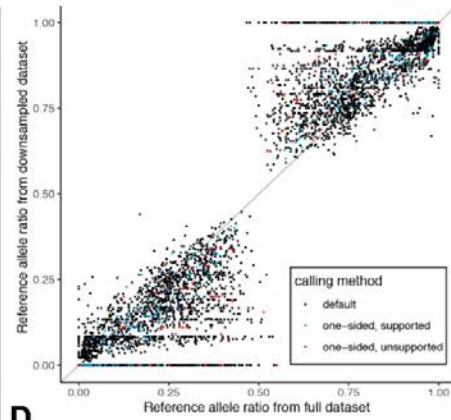

**D** ASE hetSNVs in NA12878 with relaxed FDR calling

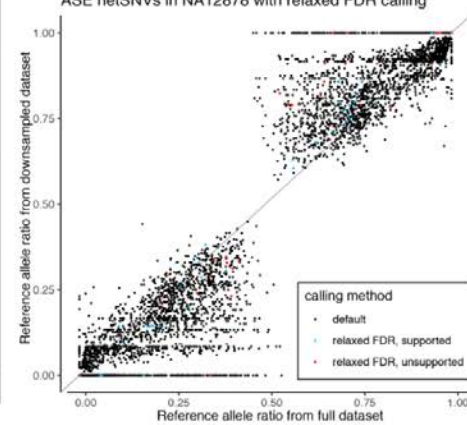

**E** Comparison of calling methods

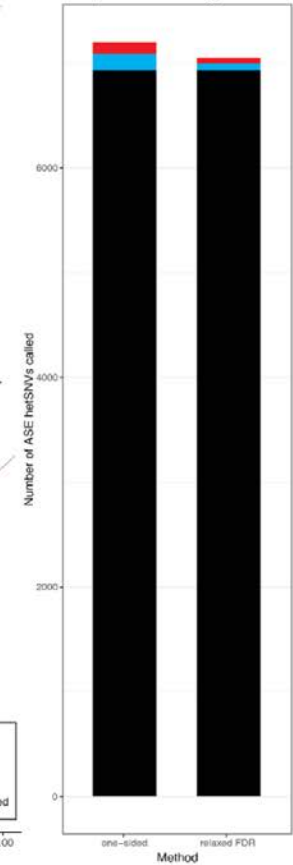



### **Data S13. High-power AS calling, related to STAR Methods “AS Catalog” Section**

**(A)** Numbers of AS hetSNVs detected from RNA-seq in different tissues from individual 3. To produce high-power tissue-specific call sets, we called ASE and ASB sites for each tissue at a relaxed FDR threshold if the hetSNV was called AS in the pooled call set; otherwise, the sites were called at the usual 10% FDR. The “relaxed” FDR varied somewhat from tissue to tissue due to granularities in calculation but did not exceed 20%. Typically, high-power call sets produce 10%–20% more AS hetSNVs than typical call sets.

**(B) - (E)** Validation of high-power AS calling methods. To increase the detection power of ASE hetSNVs in datasets with fewer reads, we tested two high-power calling methods that selectively impose less-stringent tests on hetSNVs, which have been shown to have AS behavior in other experiments. The first method uses a one-sided beta-binomial test as its less-stringent test, while the second uses a two-sided beta-binomial test with a relaxed FDR of 20%. All hetSNVs that do not have prior evidence of being AS are evaluated with the standard two-sided beta-binomial test with an FDR of 10%. We validated both methods by testing on a deeply sequenced RNA-seq dataset from the GM12878 cell line and simulating a shallower experiment by downsampling this dataset by a factor of 4. **(B)** and **(E)** Using the default ASE calling method, 6,927 ASE hetSNVs were identified in the downsampled dataset. Of these, 79.3% were supported by the full RNA-seq dataset – that is, they were also called ASE in the full dataset. One-sided testing identified 275 additional ASE hetSNVs, and relaxed FDR testing identified 122 additional ASE hetSNVs. Both methods are enriched for supported hetSNVs as compared to the full pool of hetSNVs (59.6% and 57.4%, respectively), though they have a higher error rate than the default ASE calling method in this respect. **(C)** - **(D)** We also show a comparison of reference allele ratios of ASE hetSNVs under different calling methods. Overall, the ASE hetSNVs added by both one-sided and relaxed FDR calling display similar reference allele ratios to ASE hetSNVs identified by default calling.

**A**

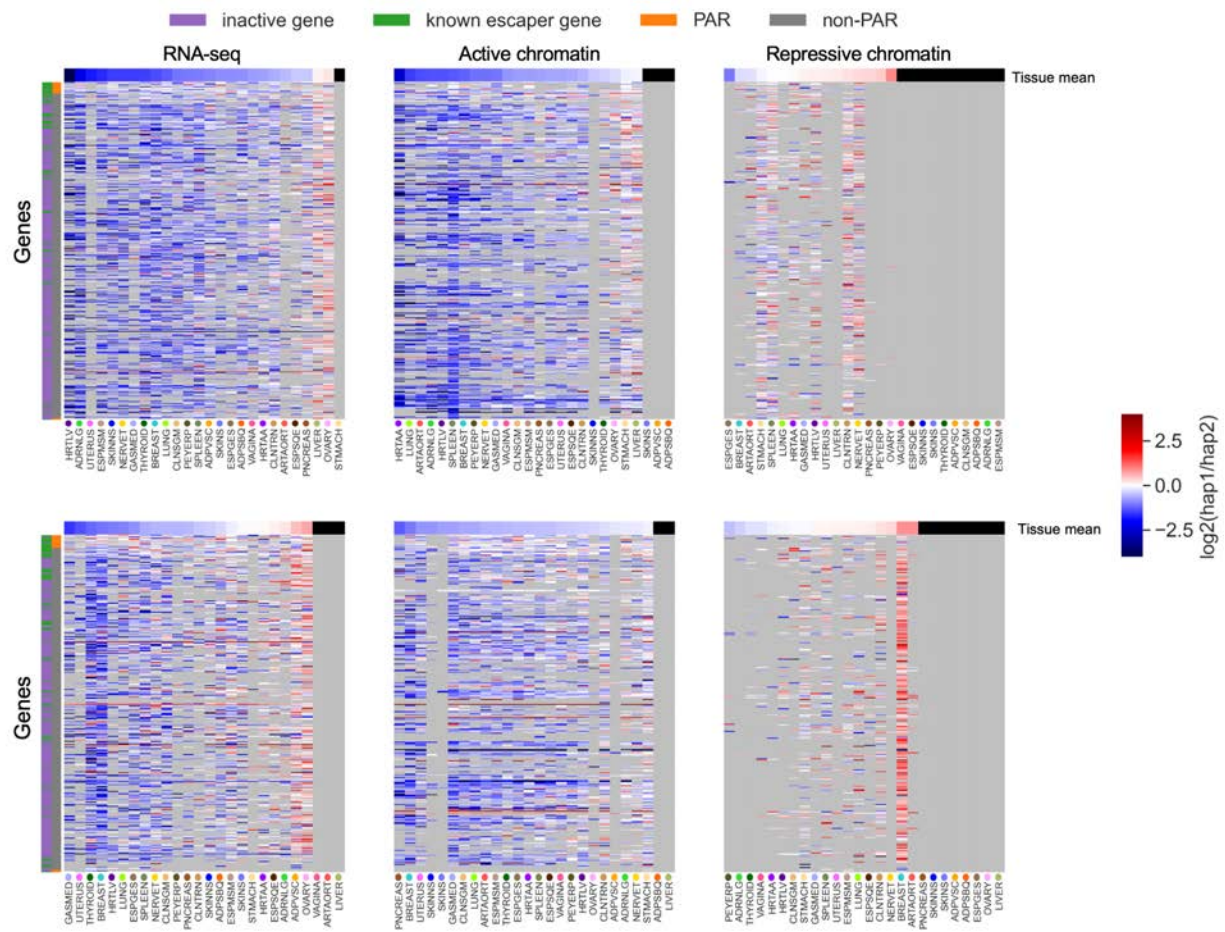

**B**

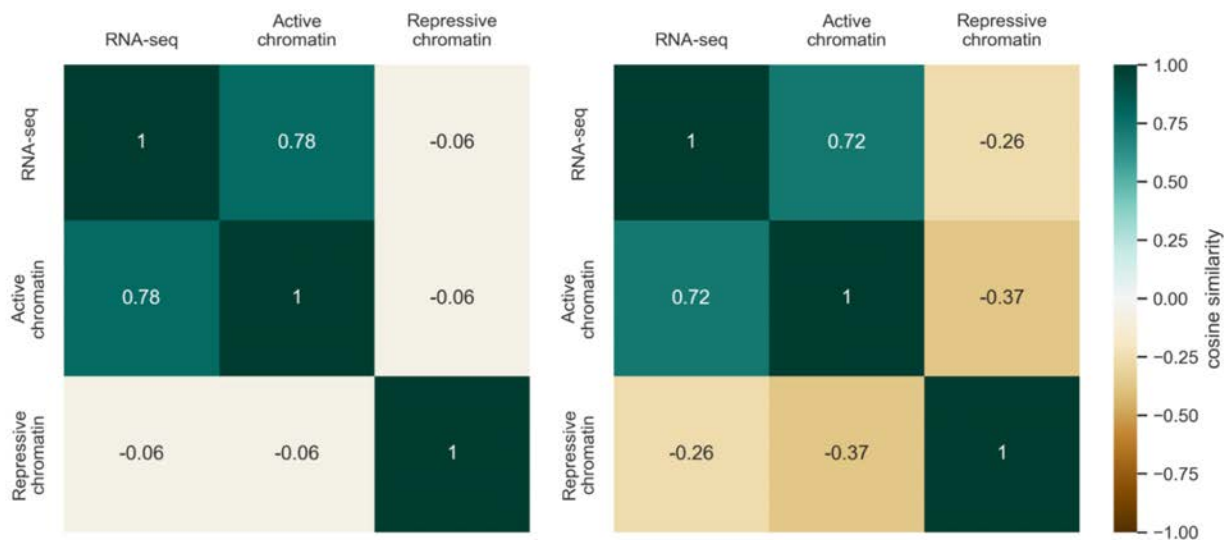

C

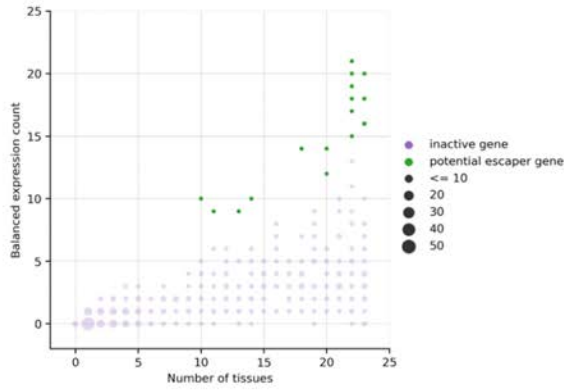

| Gene          | PAR 1 | PAR 2 | Ref  |
|---------------|-------|-------|------|
| AKAP17A       | yes   | no    | 2    |
| ARSD          | no    | no    | 2, 6 |
| ASMTL         | yes   | no    | 2    |
| CA5BP1        | no    | no    | 2    |
| DHR SX        | yes   | no    | 2    |
| DIAPH2-AS1    | no    | no    | 5    |
| EIF1AX        | no    | no    | 2, 6 |
| GTPBP6        | yes   | no    | 2    |
| IL3RA         | yes   | no    | 2    |
| KDM6A         | no    | no    | 2, 6 |
| PUDP          | no    | no    | 3    |
| RP11-706O15.1 | no    | no    | 2, 6 |
| WASH6P        | no    | yes   | 4    |
| ZFX           | no    | no    | 2, 6 |

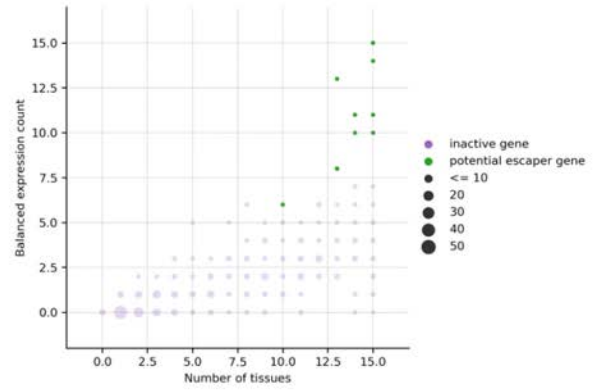

| Gene          | PAR 1 | PAR 2 | Ref     |
|---------------|-------|-------|---------|
| AKAP17A       | yes   | no    | 2       |
| DHR SX        | yes   | no    | 2       |
| GTPBP6        | yes   | no    | 2       |
| KDM5C         | no    | no    | 1, 2, 6 |
| KDM6A         | no    | no    | 2, 6    |
| MXRA5         | no    | no    | 2, 6    |
| RP11-706O15.1 | no    | no    | 2, 6    |
| SLC25A6       | yes   | no    | 2       |
| TRAPPC2       | no    | no    | 2, 6    |
| WASH6P        | no    | yes   | 4       |

escaper genes found in both ENC-003 and ENC-004

D

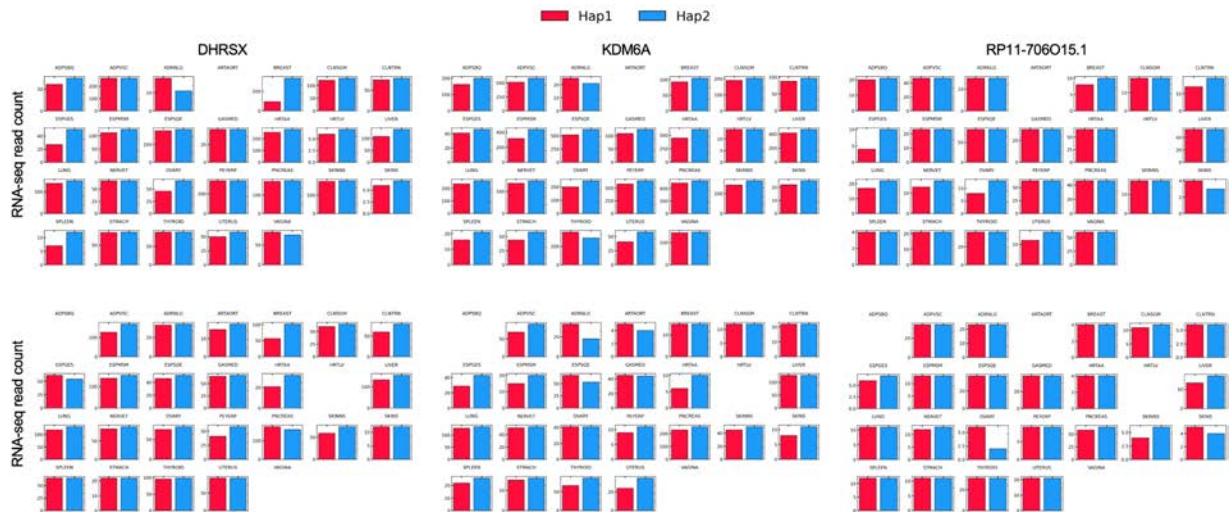

**E**

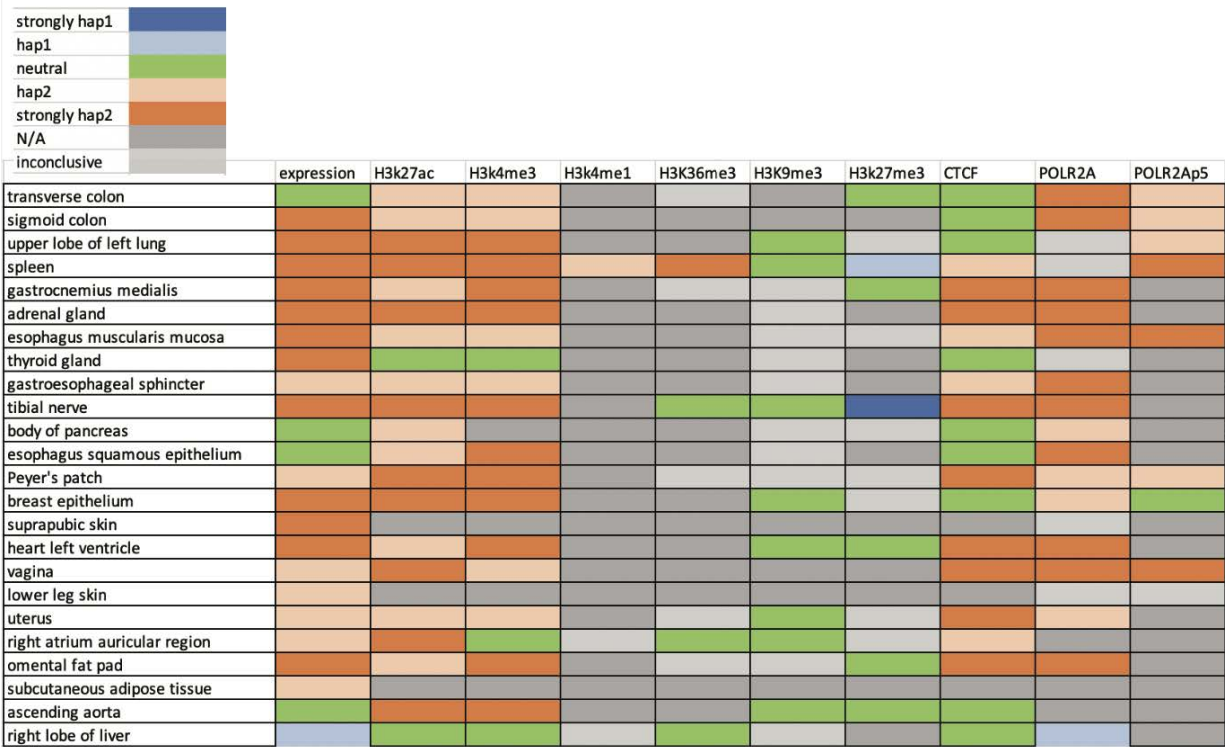

**F**

Chromosome X: RNA-seq (red), H3K27ac (blue), and H3K9me3 (orange) Distributions in Tibial Nerve

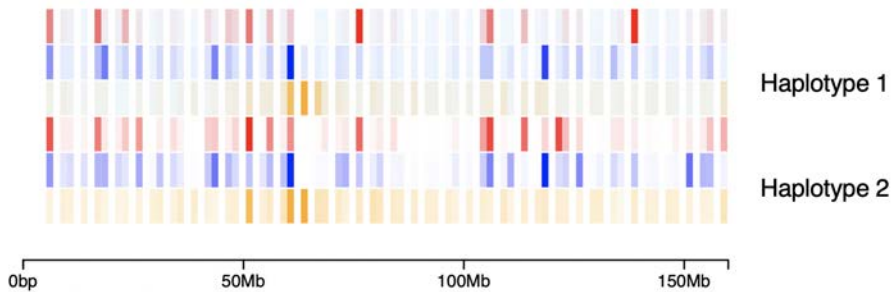

Chromosome X: RNA-seq (red) and H3K27ac (blue) Distributions in Adrenal Gland

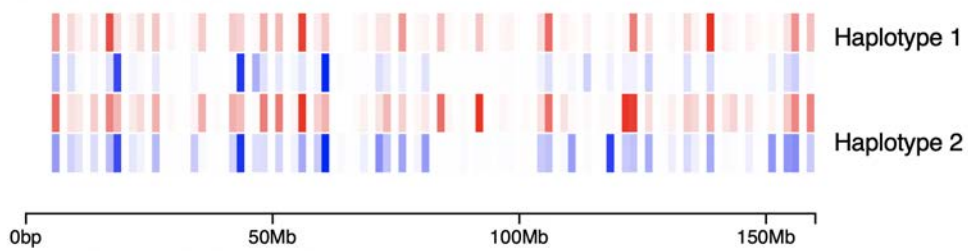

G

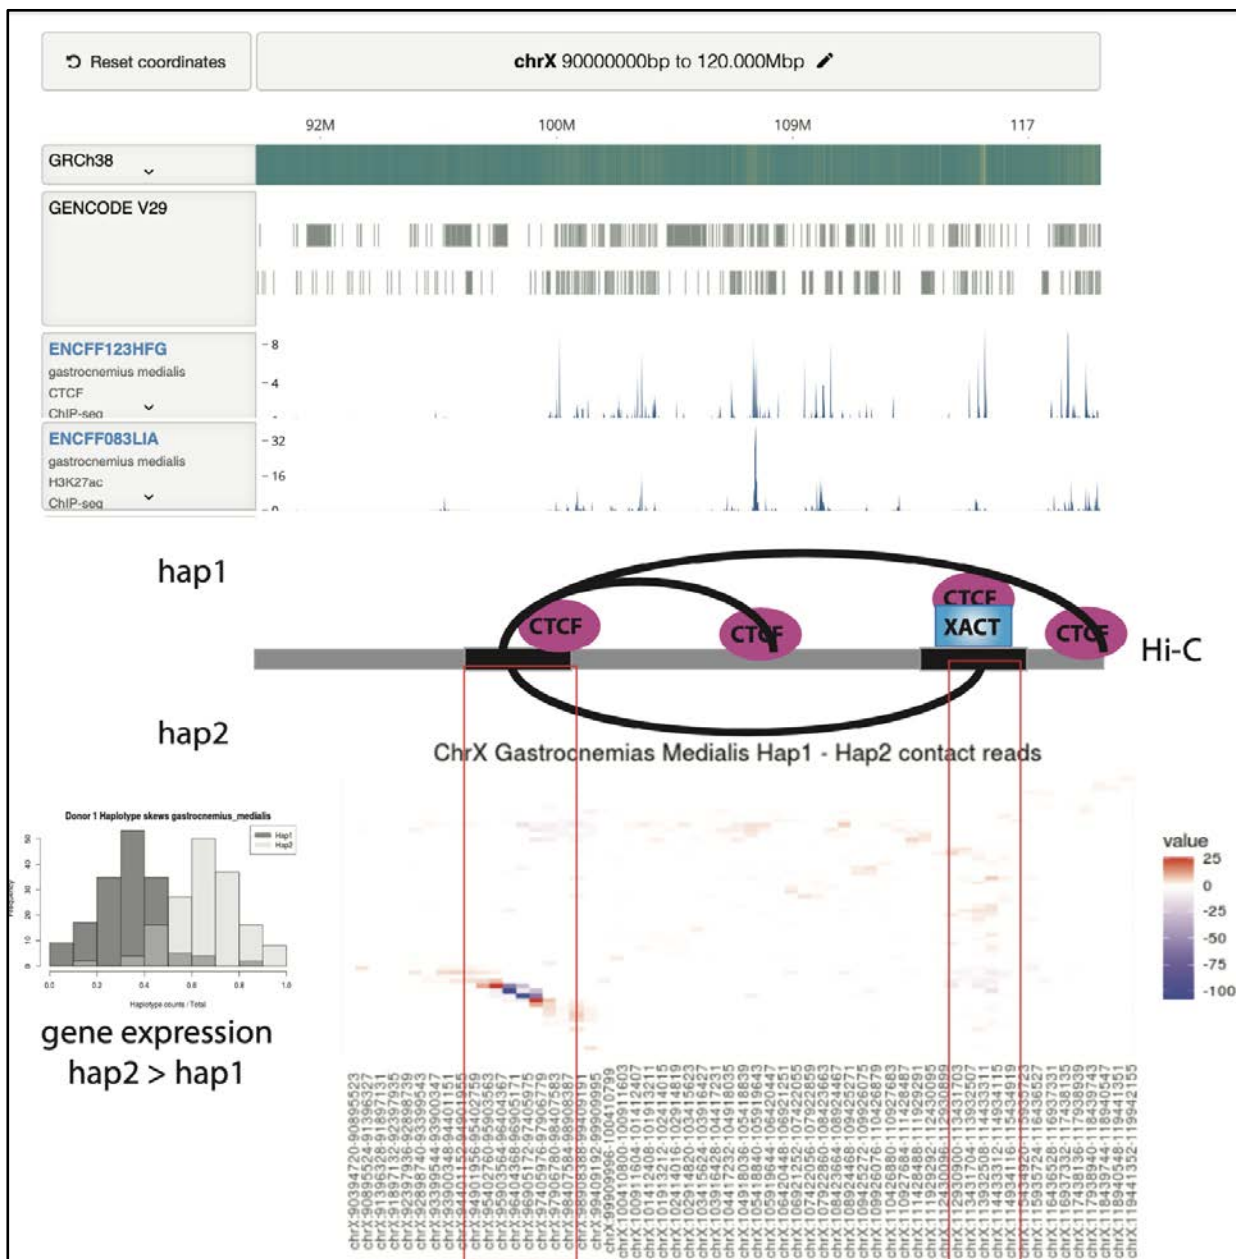



**H**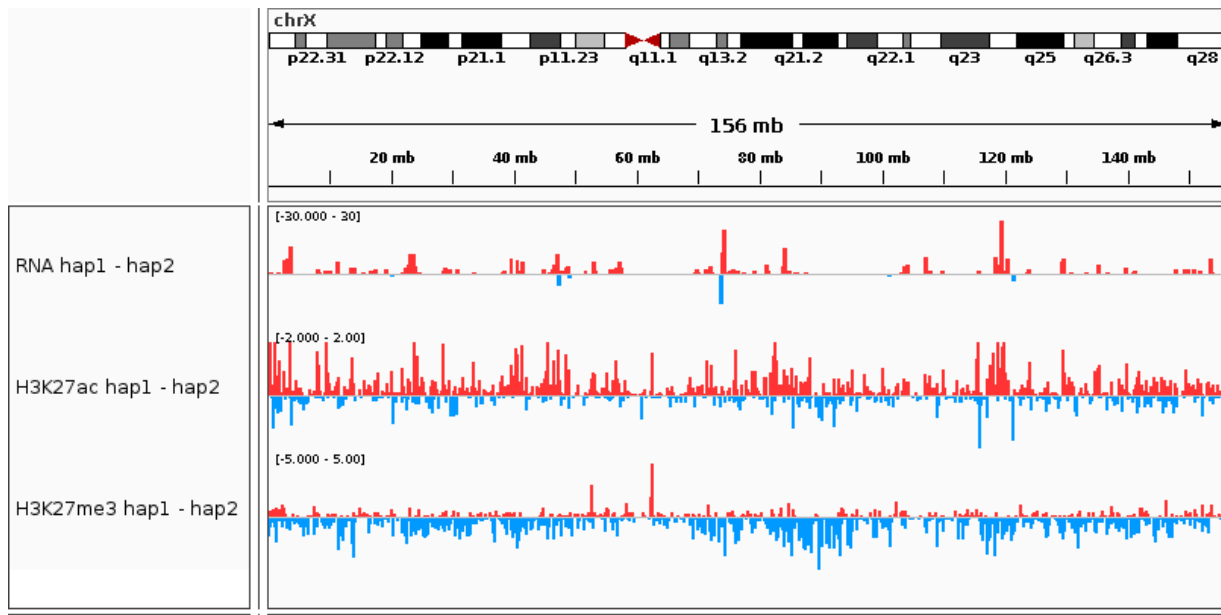

**Data S14. Coordinated allele-specific activity on X Chromosome across assays, related to Figure 2 and STAR Methods “AS Examples” Section**

**(A)** Haplotype-specific gene expression and chromatin assays on chrX. Fold-change values ( $\log_2[\text{haplotype1}/\text{haplotype2}]$ ) for phased RNA-seq read counts (left column), active chromatin marks (middle), and repressive chromatin marks (right) are shown above for EN-TEX individuals ENC-003 (top row) and ENC-004 (bottom row). Heatmap columns are the observed EN-TEX tissues and rows are the GENCODE v24 genes. Chromatin marks are the mean signal from a  $\pm 10$  Kb region flanking genes. Active and repressive marks are pools of active (CTCF, EP300, H3K27ac, H3K4me3, H3K36me3, H3K4me1, POLR2A) and repressive (H3K27me3, H3K9me3) chromatin assays, respectively. Light gray cells of a heatmap represent missing or no signal for the given data type. Far left bars represent the inactive genes (purple), known escaper genes (green), pseudoautosomal regions (PAR [orange]), and non-PAR (dark gray). Top bars are the mean tissue (i.e., column) value for each data type’s fold-change values (black is missing/no data). Heatmap columns are sorted by tissue means. Overall, phased RNA-seq read counts and active chromatin marks show a higher signal on the same allele. It is unclear whether repressive chromatin marks are more pervasive on the opposite allele due to the sparsity of the data (see data matrix in Figure S1A).

**(B)** Similarity of haplotype-specific gene expression and chromatin assays on chrX. Cosine similarity between the mean tissue values in Data S14A for individuals ENC-003 (*left*) and ENC-004 (*right*). Phased RNA-seq read counts are shown to be more similar to active chromatin marks than repressive chromatin marks for both individuals.

**(C)** Identifying potential X-chromosome inactivation (XCI) escaper genes. GENCODE v24 genes on chrX were classified as either inactive (purple) or potential escaper (green) genes based on the RNA-seq fold-change values shown in Data S14A for individuals ENC-003 (left column) and ENC-004 (right column). Escaper genes were identified as genes showing balanced expression (haplotype ratio within 30%) in a majority of their expressed tissues. To support pan-tissue chromatin analysis and avoid spurious observations from lowly expression

genes, the analysis was limited to genes expressed in eight or more tissues. Identified individual-specific, potential escaper genes are listed below each scatterplot. All potential escaper genes have previously been found to escape XCI per the provided references: 1. Mugford et al., 2014<sup>8</sup>; 2. Tukiainen et al., 2017<sup>9</sup>; 3. Garieri et al., 2018<sup>10</sup>; 4. Zhang et al., 2020<sup>11</sup>; 5. Zito et al., 2021<sup>12</sup>; and 6. Werner et al., 2022<sup>13</sup>.

**(D)** Example potential X-chromosome inactivation escaper genes. Three previously known escaper genes (DHRSX, KDM6A, and RP11-706O15.1 - left, middle, and right columns) identified from EN-TE<sub>x</sub> phased RNA-seq data analysis for both individuals ENC-003 (top row) and ENC-004 (bottom row). Barplots represent the (im)balanced expression of a gene using hap1 (red) and hap2 (blue) RNA-seq read counts for each individual in a given tissue. Undrawn bar plots represent missing/no data for that individual and tissue combination. Shown escaper genes demonstrate balanced expression across tissues for each individual.

**(E)** Heatmap to show haplotype specificity of chrX for all assays and tissues from individual 3. We detected that ~21% of the accessible chrX genes have significantly imbalanced expression levels between the two haplotypes. Orange squares indicate more expression and binding peaks in hap2, whereas blue squares indicate more expression and binding peaks in hap1. Green squares indicate that the expression and binding are balanced between the two haplotypes. Light gray squares indicate that the number of data points is small and, consequently, we cannot conclude which haplotype has more expression and binding. Dark gray squares indicate that data are not available for a given assay and tissue. Our findings (Panel A-E) are consistent with a recent study<sup>13</sup> that demonstrated X-inactivation is shared across many tissues using GTEx and EN-TE<sub>x</sub> data. This study suggested that X-inactivation is completed before the germ-layer specification. Therefore, any skew in selecting which X-chromosome is activated propagates to the ectoderm, endoderm, and mesoderm, resulting in observations of the same skew across many tissues. The way in which cells activate which X chromosome is a random process that follows a probabilistic distribution before the specification of the germ layer. Developed tissues are much more likely to have cells with the same activated X-chromosome<sup>13</sup>. Our findings here are also consistent with this study regarding which tissues show bias towards which haplotype. For example, Werner et al.<sup>13</sup> show that the liver and ovary are ranked 46th and 42nd (out of 46 GTEx tissues) in terms of their skew being the same direction as other tissues.

**(F)** Chromosome painting of chrX using RNA-seq and ChIP-seq in both haplotypes of individual 3 in two tissues. This plot shows that the active haplotype is hap2 in chrX of individual 3, as there is more activity in hap2.

**(G)** XACT locus on chrX is shown to have haplotype-specific chromatin interactions with an upstream region. In the signal tracks, both XACT and the upstream loci are shown to have CTCF bound, which is also associated with the H3K27ac signal. The heatmap shows differential chromatin interactions from haplotype-resolved Hi-C. The AS Hi-C interaction with the XACT locus and an upstream element occurs on the active haplotype, which was characterized by the difference in AS gene expression values (histogram).

**(H)** Coordinated AS activity in chrX. Similar to Figure 2A, we show the differences in the levels of gene expression, H3K27ac, and H3K27me3 between the two X chromosomes in the thyroid gland of individual 4. The high RNA expression levels from hap1 indicates that this chrX is

active. Note the higher H3K27ac levels and lower H3K27me3 levels in this chrX. Note, only individual 3 was shown in Figure 2A.



**A**

| Individual | SNVs      | indels  | SVs    |
|------------|-----------|---------|--------|
| 1          | 3,900,246 | 536,621 | 18,460 |
| 2          | 3,878,924 | 545,419 | 17,649 |
| 3          | 4,023,587 | 577,594 | 18,542 |
| 4          | 3,952,264 | 556,055 | 19,183 |

**B**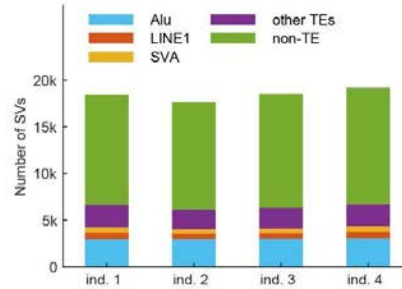**C**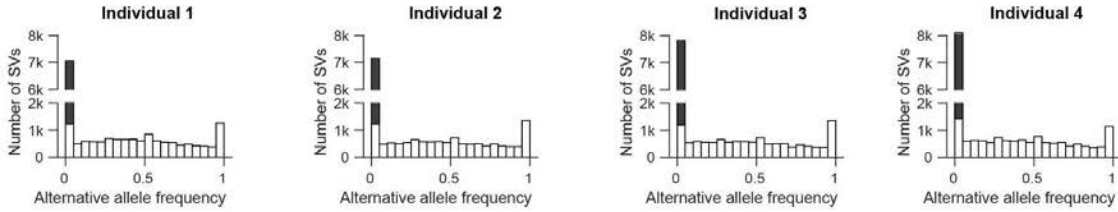**D**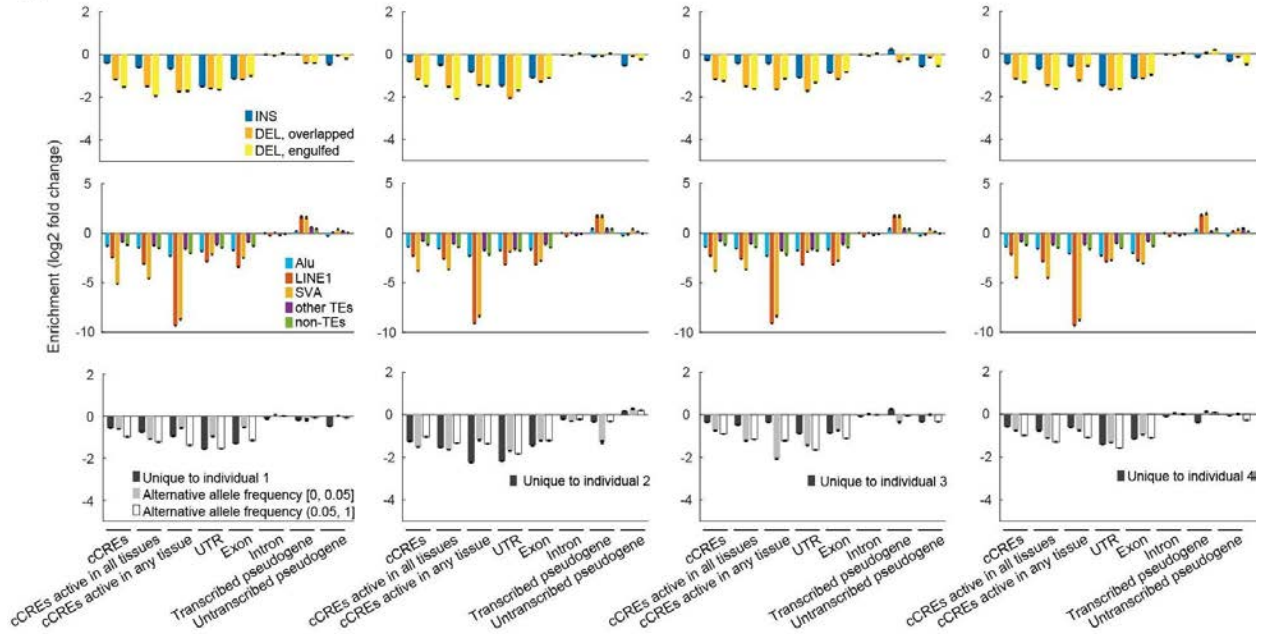**E**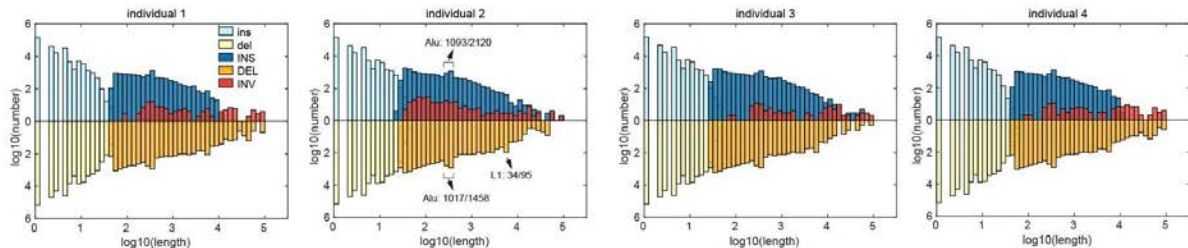

### Data S15. Analysis of SVs, related to Figure 1 and STAR Methods “SVs” Section

(A) Number of genomic variants in the four individuals.

(B) Number of SVs associated with transposable elements.

(C) Allele frequencies of SVs in the European population calculated by overlapping with the results from Audano et al.<sup>14</sup>. SVs that have no overlap with the results from Audano et al. are shaded in the first bin.

**(D)** Overlaps between SVs and functional genomic regions. We shuffled the locations of the SVs (see STAR Methods “SVs” Section) to determine whether SVs are enriched or depleted in a given type of genomic region. For DELs, we consider cases in which a DEL partially overlaps with a given genomic region (DEL, partial) and cases in which a DEL is engulfed by a given genomic region (DEL, engulfed).

**(E)** Lengths of indels and SVs in the four individuals. The peaks around  $10^{2.5}$  bp and  $10^{3.7}$  bp are due to Alu and LINE1. In individual 2, we show the fractions of SVs associated with Alu and LINE1 in the corresponding bins. Note that these fractions are much higher than those in (B).

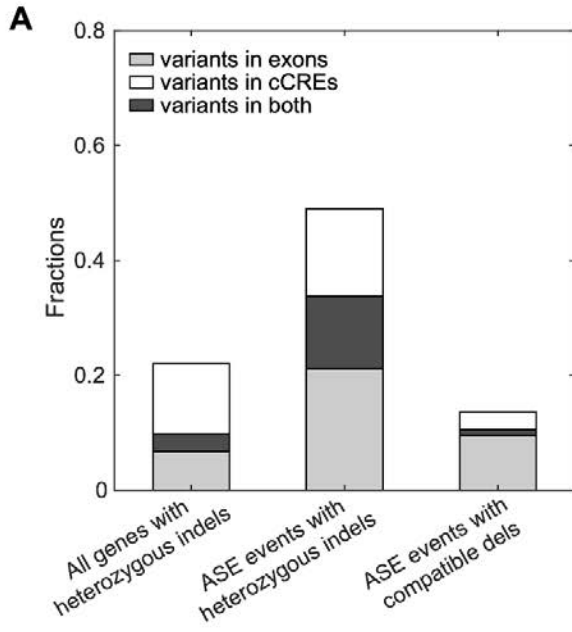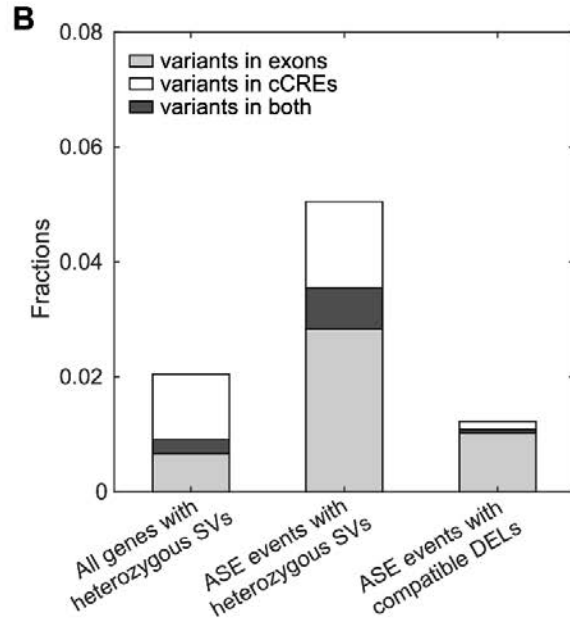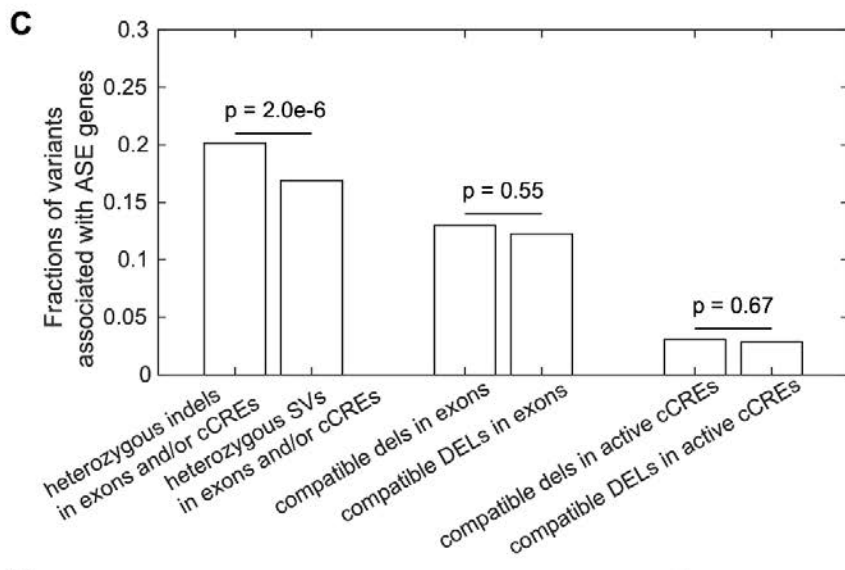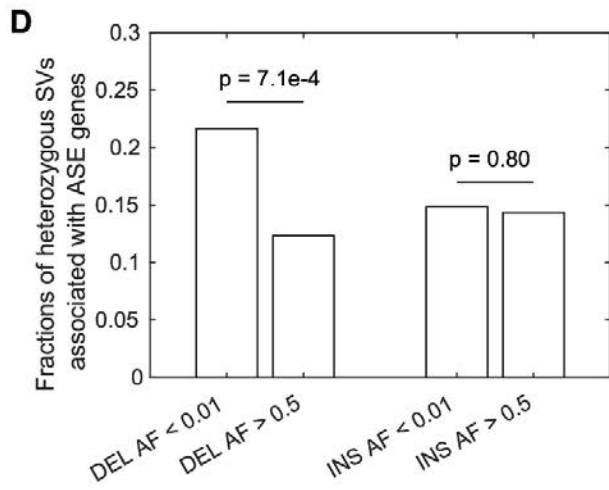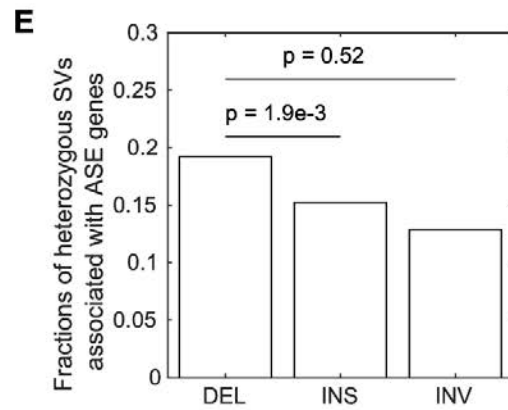

**Data S16. Association between ASE events and indels or SVs, related to Figure 2 and STAR Methods “SVs” Section**

**(A) - (B)** ASE events associated with indels and SVs. For an ASE event in a given tissue of a given individual, we looked for heterozygous indels and SVs that intersect with the exons of the ASE gene and/or with cCREs within +/- 10 Kb of the gene's TSS. For comparison, we also show the fractions of genes (ASE or not) whose exons and/or nearby cCREs intersect with a heterozygous indel and SV. If the heterozygous small deletion and DEL had clear genotypes, we further evaluated whether they are compatible with the ASE event, i.e., the presence of the variants in exons and/or the tissue-specific active cCREs (STAR Methods “SVs” Section) should reduce gene expression. Since the exact breakpoints of SVs are often uncertain and SVs may disrupt nearby regions, we expanded the location of each SV by 100 bp upstream and 100 bp downstream when intersecting it with exons and cCREs. (A) The fractions of ASE events associated with indels and compatible deletions. (B) The fractions of ASE events associated with SVs and compatible DELs. In both panels, we pooled the ASE events and ASE events with associated variants from all tissues of all four individuals before calculating the fractions. Specifically in (B), we found 42 ASE events that are associated with compatible DELs in the tissue-specific active cCREs, 323 associated with compatible DELs in exons, and 22 associated with compatible DELs in both.

**(C) - (E)** Indels and SVs associated with ASE. Similar to (A) and (B), we looked for heterozygous indels and SVs that intersect with at least one of two genomic regions: an exon, and cCREs that are within +/- 10 Kb of a TSS. Among these variants, we calculated the fractions of those where the associated gene shows ASE in at least one tissue of the individual who carries the variants. We expanded the location of the SV by 100 bp upstream and 100 bp downstream before intersecting with exons and cCREs. (C) The fractions of indels and SVs associated with ASE. For heterozygous deletions and DELs that have clear genotypes, we further evaluated whether they are compatible with the associated ASE (panels A and B). The fractions of compatible variants among those that intersect with an exon or any tissue-specific active cCREs are shown in separate groups. (D) The fractions of rare (allele frequency (AF) < 0.01) and common (AF > 0.05) SVs that are associated with ASE among those that intersect with an exon and/or cCREs. Because the AF of INVs is below 0.01 in each of the four individuals, we could not compare rare vs. common INVs. (E) The fractions of DELs, INs, and INVs that are associated with ASE among each type of SV that intersect with an exon and/or cCREs. In all panels, we pooled variants of interest from all tissues of all four individuals before calculating the fractions. Differences between fractions were tested via the  $\chi^2$  test.

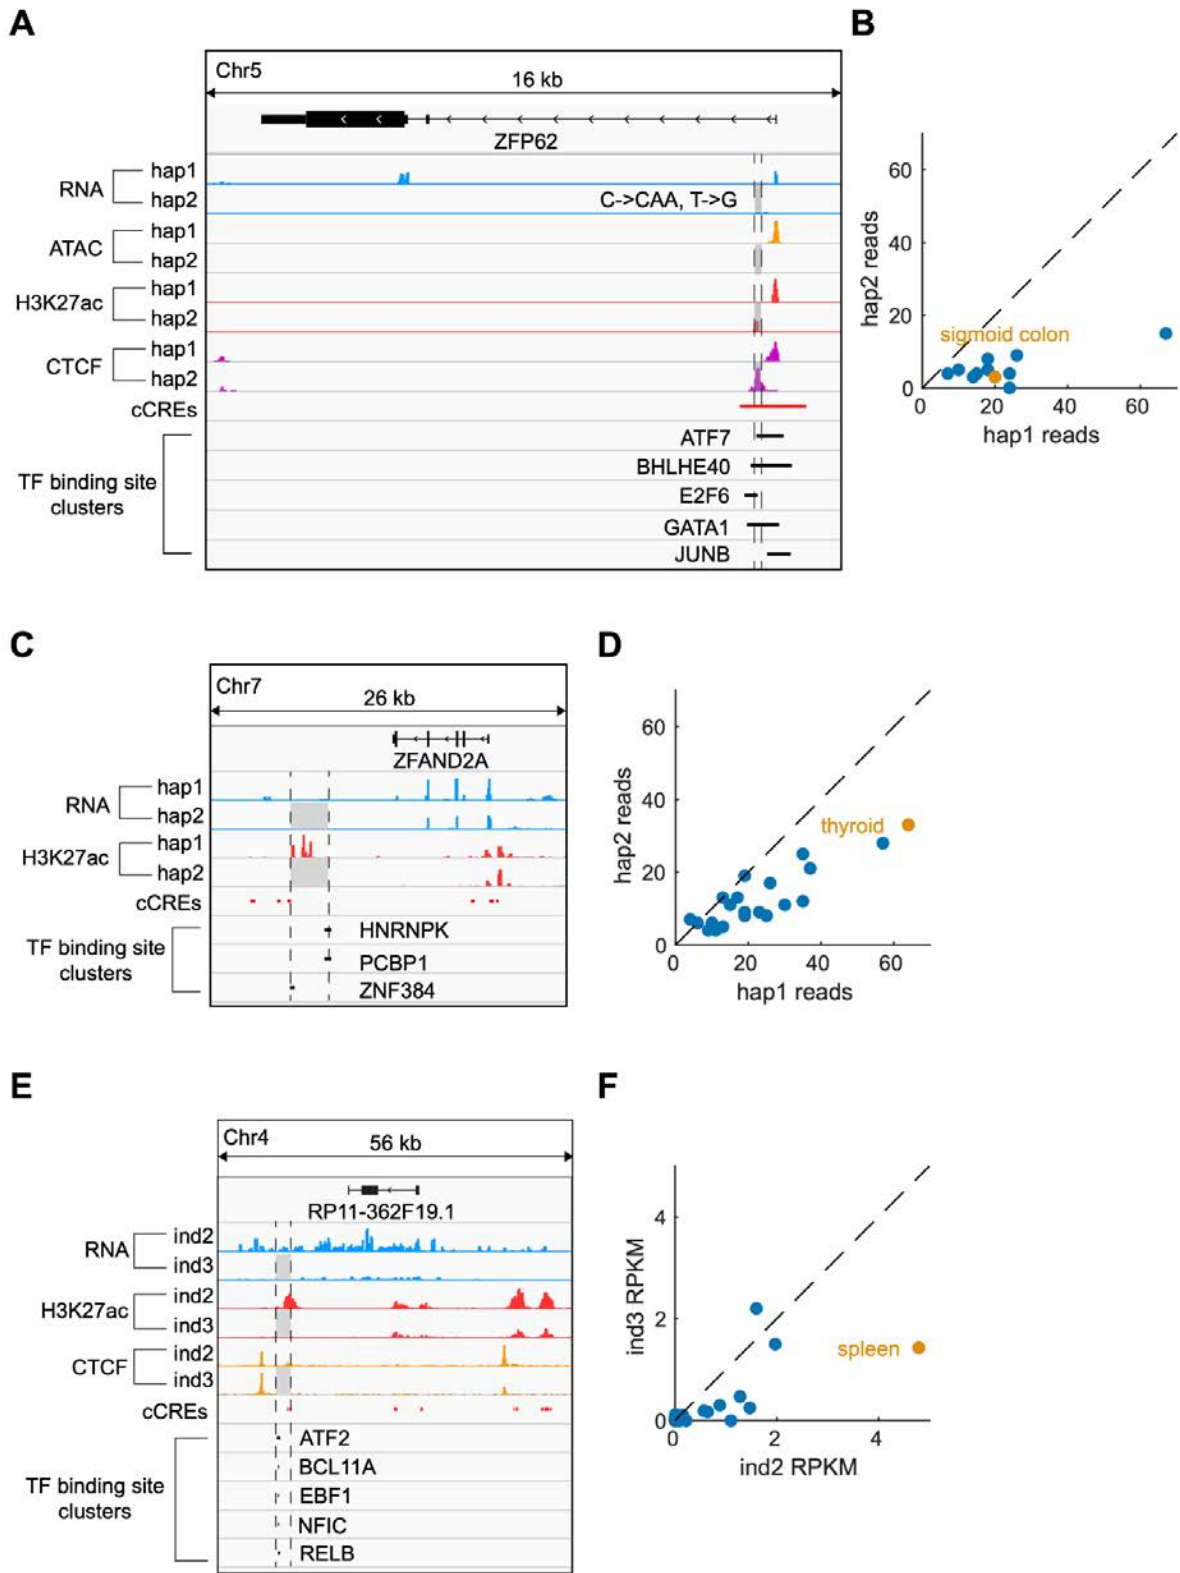

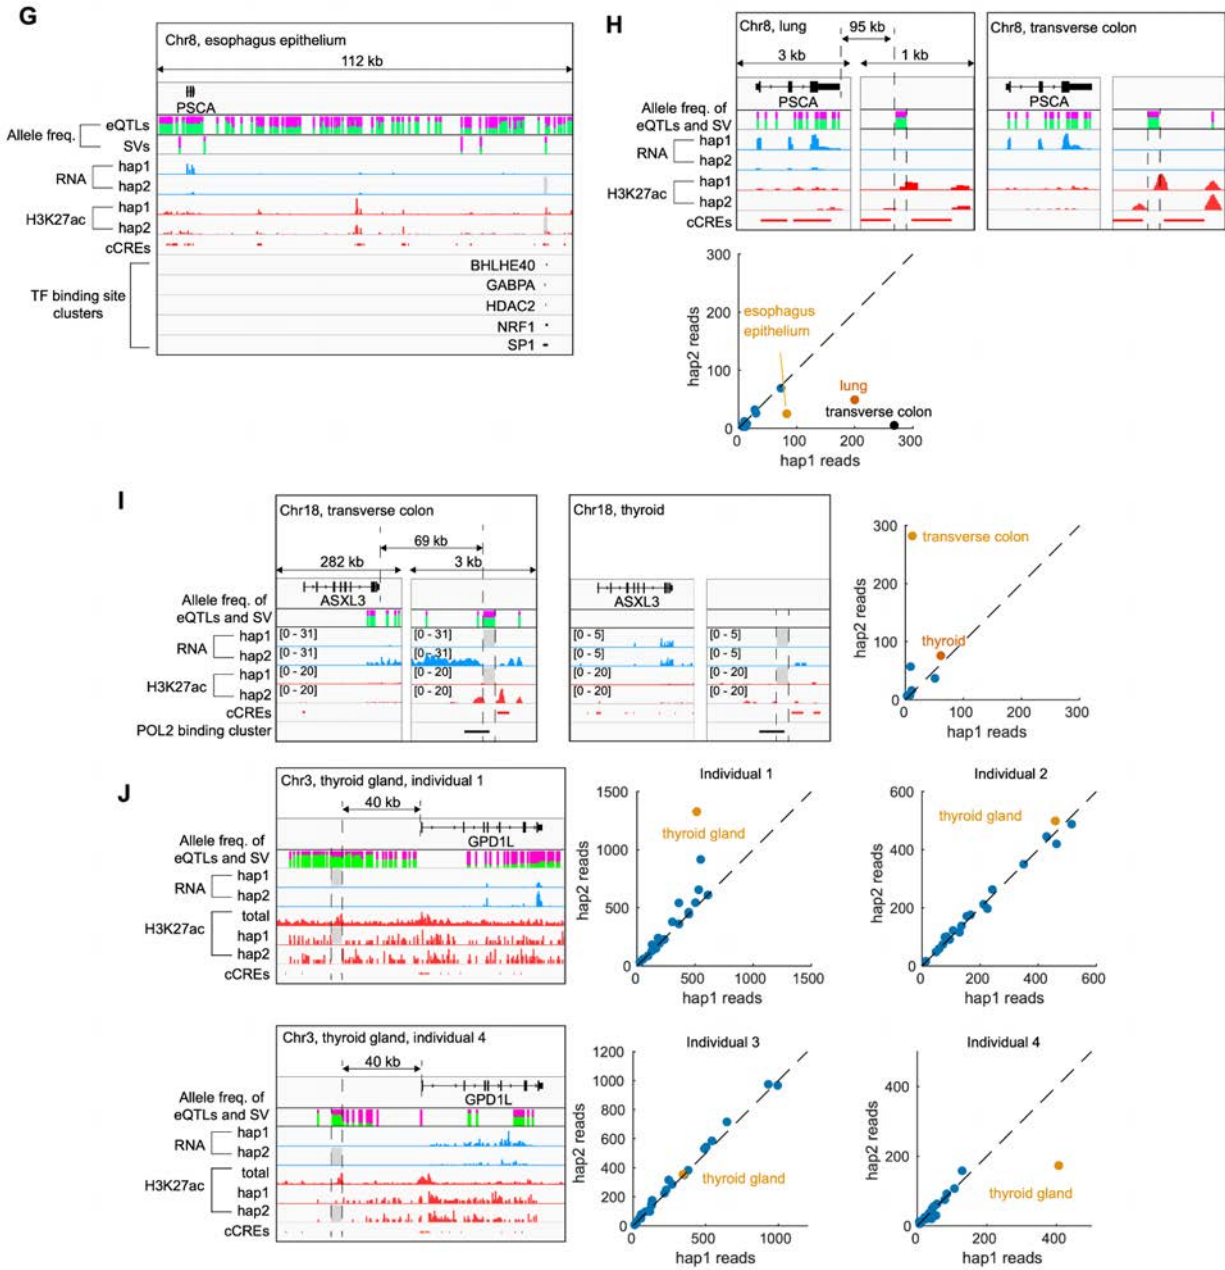



**K**

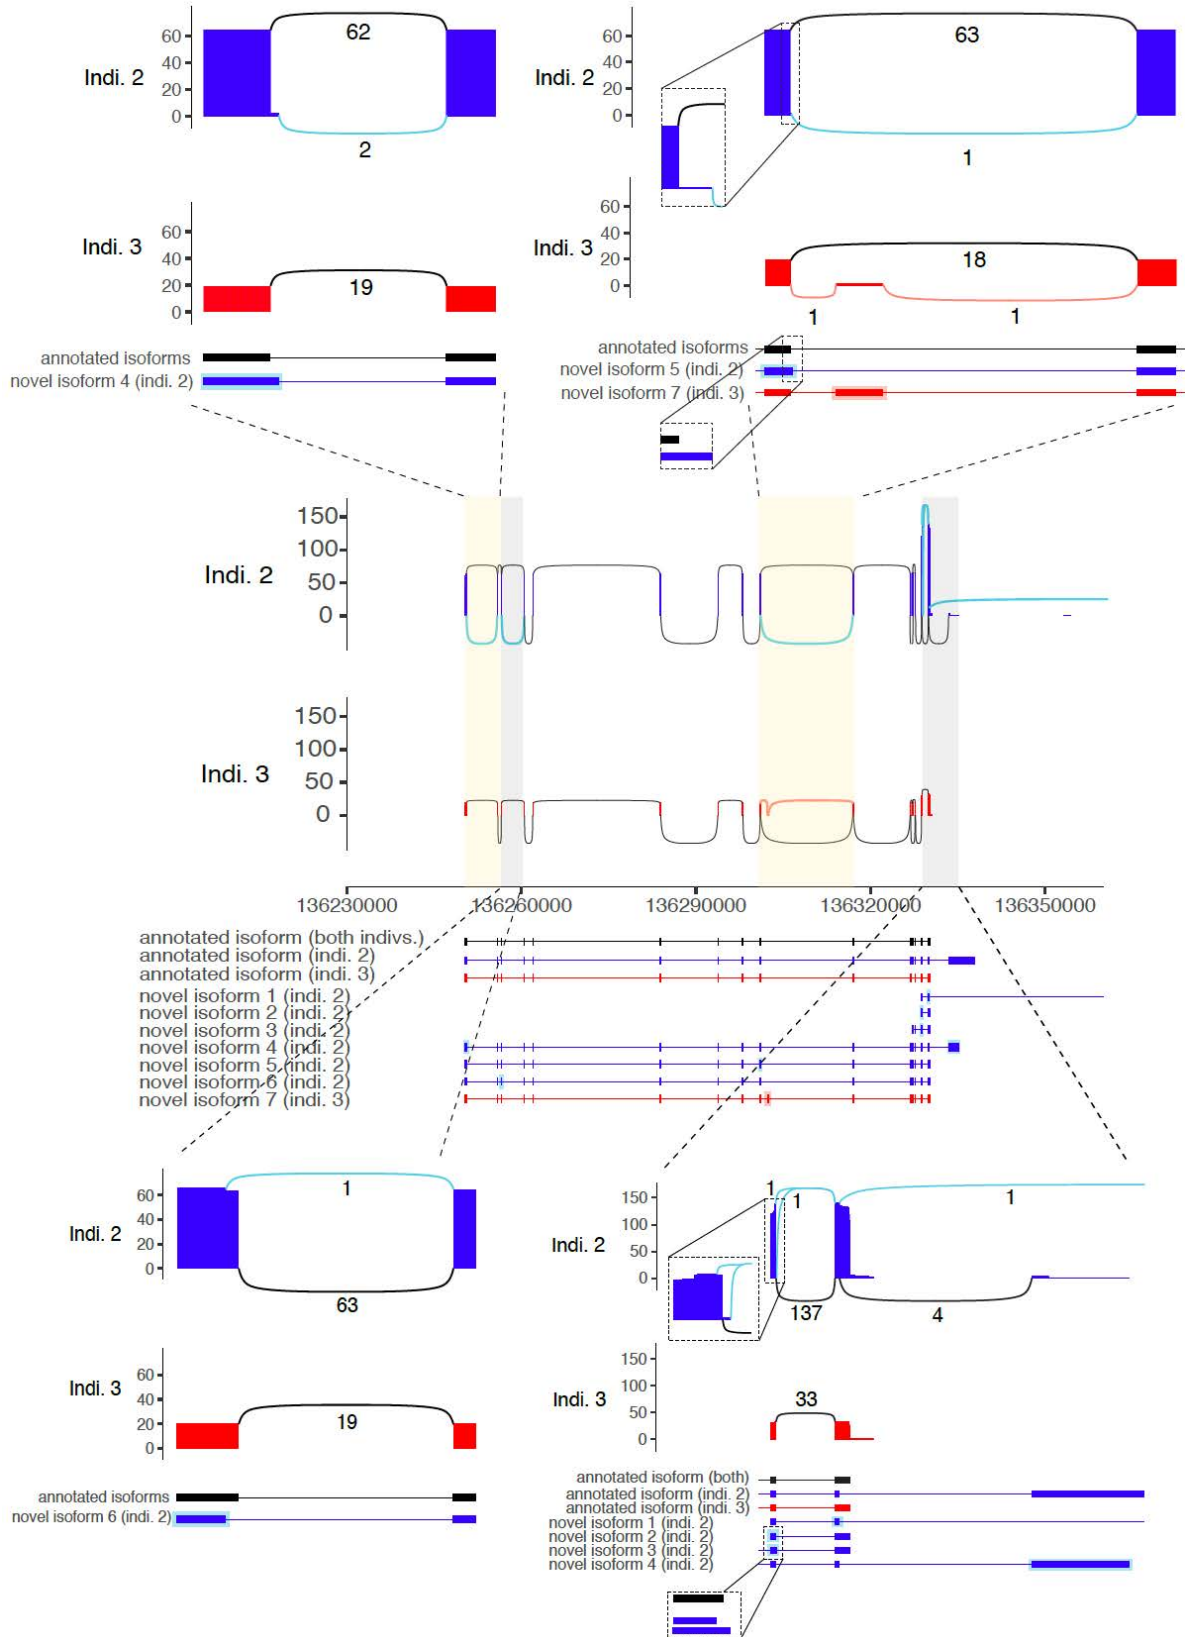

L

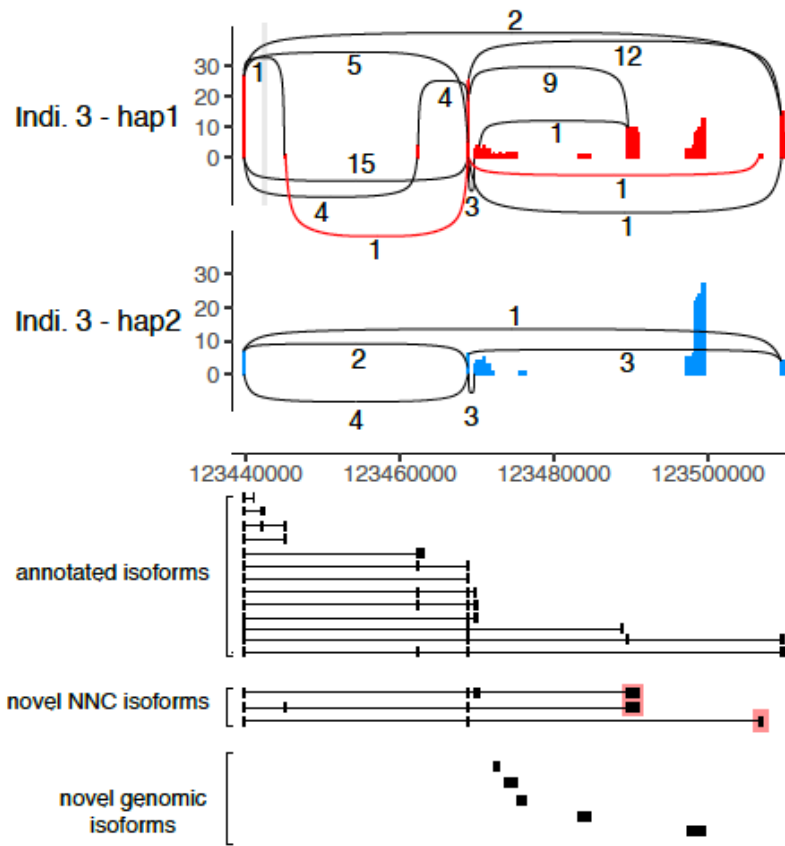

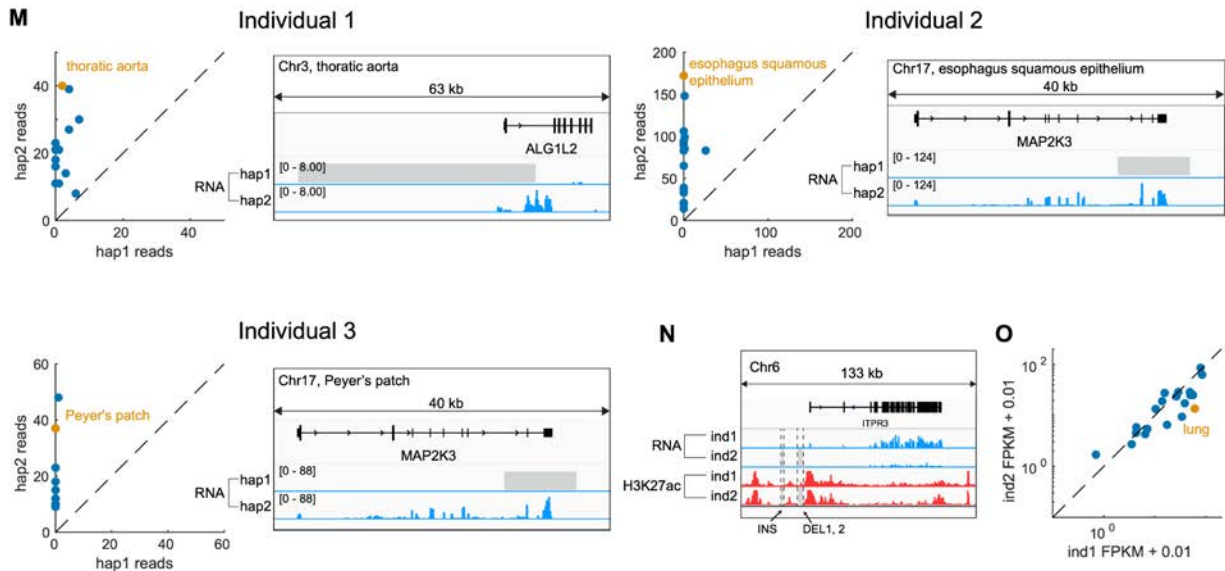

**Data S17. Examples of SVs associated with changes in gene expression, related to Figure 2, Figure S4, and STAR Methods “SVs” Section**

**(A) - (B)** An indel that potentially changes gene expression. (A) In the sigmoid colon of individual 2, the gene *ZFP62* has lower expression in hap2. The TSS region of *ZFP62* in hap2 shows lower chromatin accessibility and changes in the positions of H3K27ac and CTCF binding peaks, compared with the same region in hap1. In hap2, a 2 bp insertion and an SNV were found in a cCRE near the TSS of the gene (the two variants are very close and are shown together by a single gray box). These variants and nearby variants that cannot be phased (not shown) might affect the function of the cCRE. (B) The gene has lower hap2 expression in multiple tissues, suggesting a universal factor changing the expression between haplotypes.

**(C) - (D)** Shadow figure associated with Figure 2D. (C) Similar to Figure 2D, the deletion in hap2 can disrupt cCREs identified in the thyroid and the binding of several TFs. (D) *ZFAND2A* has lower hap2 expression among multiple tissues, suggesting that the deletion may have a global effect on the expression of this gene. Note that this is consistent with the results in Chiang et al.<sup>15</sup>. Note that the p-value of the AS expression in Figure 2D was based on beta-binomial distribution.

**(E) - (F)** Shadow figure associated with Figure S4C. (E) Similar to Figure S4C, the deletion in hap2 can disrupt spleen-specific cCREs and the binding of several TFs. (F) In multiple tissues, *RP11-362F19.1* has lower expression in individual 3 than in individual 2, suggesting that the deletion may have a global effect on the expression of this gene.

**(G) - (J)** SVs potentially linked to eQTLs. Panels (G) and (H) are shadow figures of Figure 2E. (G) This panel is the same as Figure 2E, but shows a panoramic view near the gene *PSCA*, including additional eQTLs that are compatible with the ASE of *PSCA*. The allele frequencies of the hap2 alleles at these eQTL sites are shown as the heights of the green bars. Note, the height of a green bar plus its corresponding magenta bar sum to 1. Similar results were observed in two other tissues from individual 3. SVs near *PSCA* and their allele frequencies are also shown. The left four SVs are deletions in hap1, and the rightmost SV is the hap2 deletion shown in Figure 4E. cCREs and TF binding sites that can potentially be disrupted by the deletion of interest are

shown. (H) *PSCA* also has a lower expression of hap2 in the lung and transverse colon of individual 3. In both tissues, the deletion has an allele frequency similar to that of some of the tissue-specific eQTLs compatible with the ASE of *PSCA*; moreover, this deletion appears to remove an H3K27ac peak in hap2, potentially causing the reduced expression of *PSCA*. Imbalance in the ASE of *PSCA* appears to be restricted to three tissues shown in (G) and (H). (I) Another example of a deletion that may be linked with compatible eQTLs of *ASXL3*. In the transverse colon of individual 2, *ASXL3* has lower expression in hap1. The relevant deletion occurs in hap1 and appears to disrupt H3K27ac and cCREs near the gene. Note that the H3K27ac levels at this cCRE and the expression levels of *PSCA* are both lower in the thyroid than in transverse colon, suggesting an association between the activity of this cCRE with *PSCA* expression. Imbalance in the ASE of *ASXL3* appears to be tissue specific. (J) A known SV-eQTL of *GPD1L*<sup>15</sup> in the thyroid gland. Individuals 1 and 4 are heterozygous for this deletion, but the former has it on hap1 and the latter has it on hap2. As shown in the signal tracks, hap1 of individual 1 and hap2 of individual 2 show lower *GPD1L* expression than the other haplotype in the respective individual. There appears to be an active enhancer 40 kb upstream of *GPD1L*, as indicated by the total H3K27ac ChIP-seq signal (fold-change of the total reads from both haplotypes over the control) and by the locations of the active cCREs in the thyroid gland. This enhancer is removed by the deletion, potentially reducing the expression levels of *GPD1L* in the corresponding haplotype. The effect of the deletion is not obvious from the haplotype-specific H3K27ac ChIP-seq reads. This is likely because the region does not have enough SNVs, which are required to map ChIP-seq reads to both haplotypes. We note that individuals 2 and 3 are homozygous for this deletion, potentially explaining the lack of ASE of *GPD1L* in these two individuals. Note that the p-value of the AS expression in Figure 2E was based on beta-binomial distribution.

**(K)** Novel splicing variants of *PCCB*. Shadow figure for Figure S4B. Sashimi plot and exonic structure representation of the *PCCB* isoforms expressed in individuals 2 (blue) and 3 (red) in adrenal gland and heart left ventricle tissues, respectively. The central panel provides a representation of the whole gene. In the sashimi plot, exons are represented by vertical lines either in blue (Ind. 2) or red (Ind. 3). Splicing connections of annotated isoforms are represented by black arcs, while novel connections observed in a specific individual are color-coded (magnifications of specific regions are provided, as well as the number of reads supporting each connection). The exonic structures of annotated and novel isoforms are reported at the bottom. The black isoform is expressed in both individuals, while those expressed in only one individual are color-coded. Annotated and novel isoforms were retrieved, for each individual, using Swan<sup>16</sup>. Specifically, a Swan gene report was generated for each individual by inputting transcriptome annotation and quantification files available, from long-read RNA-seq experiments, in the ENCODE portal (<https://www.encodeproject.org/>). These plots were obtained using ggashimi<sup>17</sup>.

**(L)** Novel splicing variants of *TRDN-AS1*. Sashimi plot and exonic structure representation of the lncRNA *TRDN-AS1* isoforms in individual 3 in heart left ventricle. This gene carries a heterozygous deletion on hap1 (highlighted in gray) and shows ASE in the right atrium auricular region (with hap1 being more highly expressed than hap2). For the sashimi representation, reads available from long-read RNA-seq experiments (see the ENCODE portal) were phased to the two haplotypes using heterozygous SNVs that overlap with the gene's exons. Read phasing was performed with ASCII Genome (<https://github.com/dariober/ASCIIGenome/>)<sup>18</sup>. Long-read

RNA-seq reads show consistently higher expression of hap1 compared with hap2. Moreover, reads mapping to hap1 give rise to two novel splicing junctions (represented by red arcs) and two novel exons (highlighted in red in the exonic structure representation at the bottom). Annotated and novel isoforms were retrieved for each individual using Swan<sup>16</sup>. A Swan gene report was generated for individual 3 by inputting transcriptome annotation and quantification files available from long-read RNA-seq experiments in the ENCODE portal. Only novel “not in catalog” (NNC) and genomic isoforms are shown. These plots were obtained using ggashimi<sup>17</sup>.

**(M)** Null alleles potentially caused by deletion of entire exons. These examples show genes whose expression comes almost exclusively from hap2 in multiple tissues of a given individual. Further analysis revealed that each example contains a deletion in hap1 that removes multiple exons of the given gene in the given individual. We did not find null alleles associated with SV deletions in individual 4.

**(N) - (O)** Deletions in individual 2 but not individual 1. **(N)** One homozygous deletion and one heterozygous deletion upstream of *ITPR3* were found in individual 2 (the two variants are very close and are shown together by a single gray box), but are missing in individual 1. The deletions knock out part of the H3K27ac peak near the TSS of *ITPR3*, potentially reducing the gene’s expression in the lung of individual 2 compared with individual 1. **(O)** Across multiple tissues, the expression levels of *ITPR3* appear to be lower in individual 2 than individual 1.

**A**

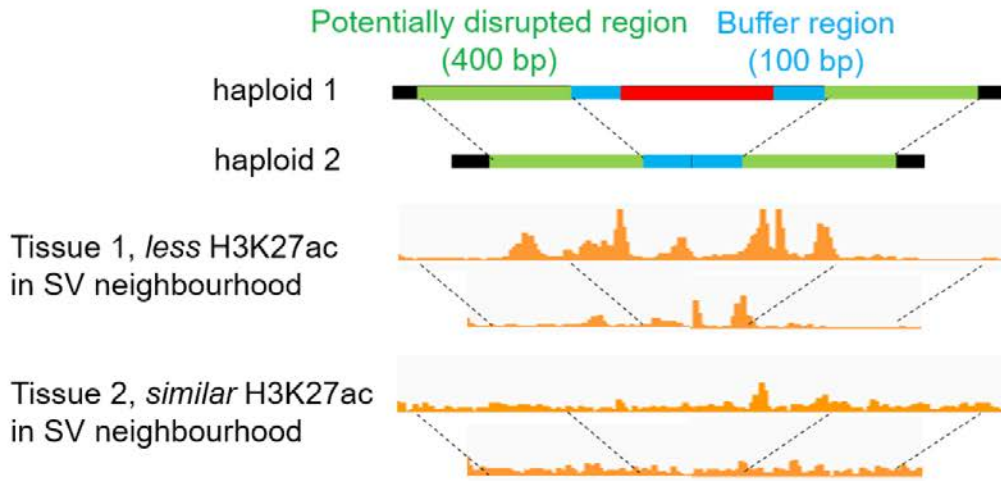

Fraction of neighbourhoods with less H3K27ac = 0.5

**B**

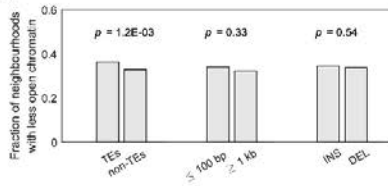

**C**

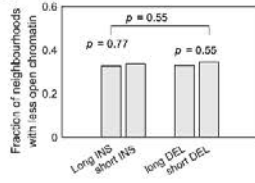

**D**

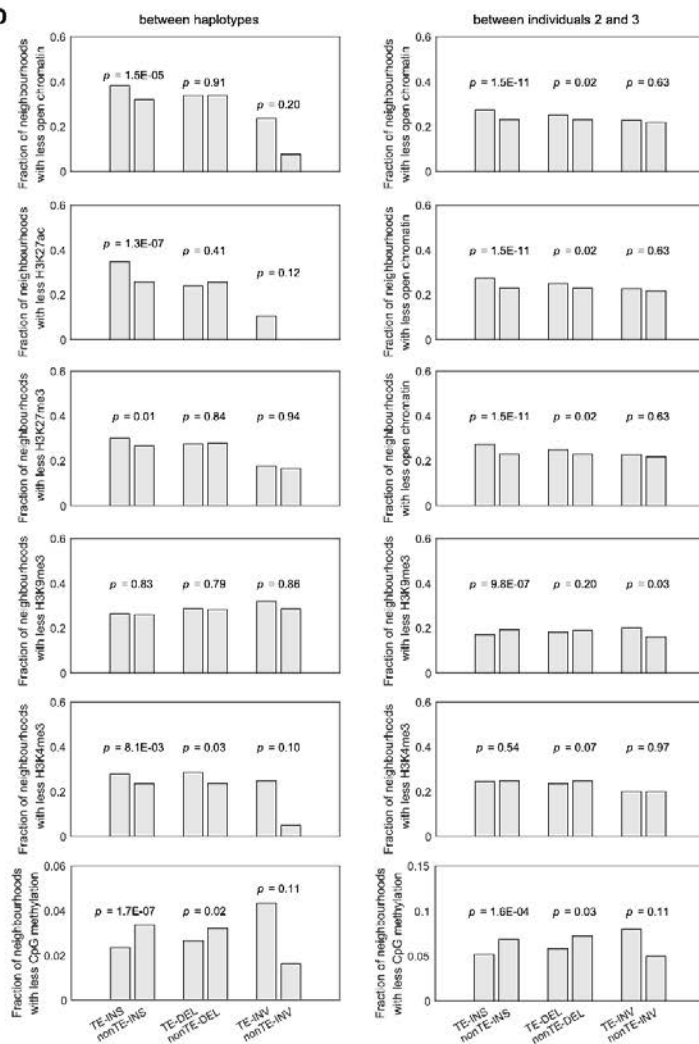



**Data S18. Potential perturbations of SVs to the chromatin states of neighboring regions, related to Figure 2 and STAR Methods “SVs” Section**

**(A)** Calculating changes in the chromatin state in the SV neighborhood. Using H3K27ac levels as an example, haploid 1 of individual 1 carries a deletion (red bar) while haploid 2 is wild type at the same locus; therefore, we compared the chromatin states in the two green regions between the two haploids. In tissue 1, the H3K27ac levels in the green region are lower in haploid 1, whereas the H3K27ac levels in tissue 2 are similar in both haploids. Therefore, only half of the neighborhoods of this deletion show a reduction in H3K27ac levels. Similar analyses can be performed between two individuals by substituting the two haploids with two individuals.

**(B) - (D)** Changes in the chromatin state of SV neighborhoods. Similar to Figure 2F, we investigated whether the presence of an SV changes the chromatin state of nearby regions and whether these changes are associated with different characteristics of the SVs. The genomic regions neighboring the TE insertions show reduced chromatin accessibility more often than those of the non-TE insertions. This difference is not observed between TE deletions and non-TE deletions. The change in accessibility is determined by comparing the accessibility (from ATAC-seq) between the two haplotypes of each individual, taking the comparison of the haplotype without the SV as a reference (panel A and STAR Methods “SVs”). P-values are based on the Chi-squared test. **(B)** The reduction in the chromatin openness near SVs does not differ by SV length or SV type, **(C)** nor does it differ between long (> 1 Kb) and short (< 100 bp) SV insertions. **(D)** Changes in other chromatin states near SVs. Left panels: changes in the chromatin states near heterozygous SVs in all four individuals. The changes were calculated by comparing the chromatin states between two haploids of the same individual. Right panels: changes in the chromatin states near SVs that are only present in either individual 2 or 3 (but not both). The changes were calculated by comparing the chromatin states between two individuals. p-values of the difference in fractions were calculated by the  $\chi^2$  test.

**A**

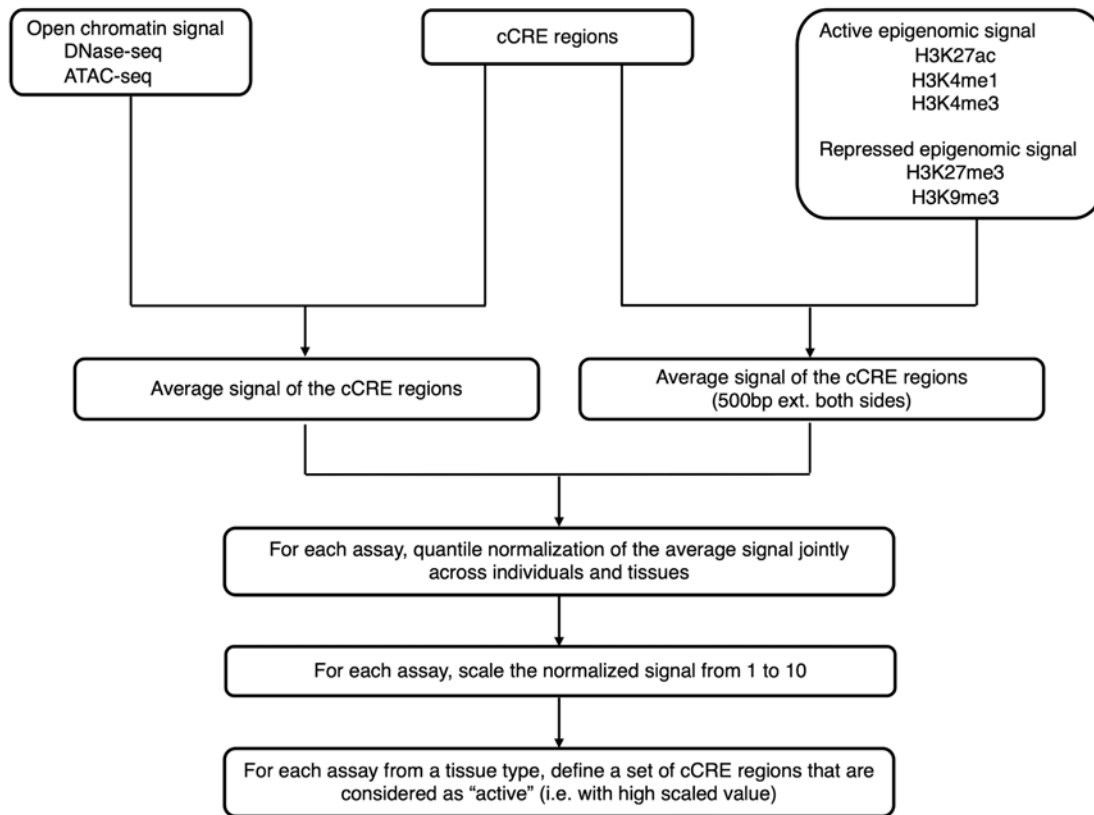

**B**

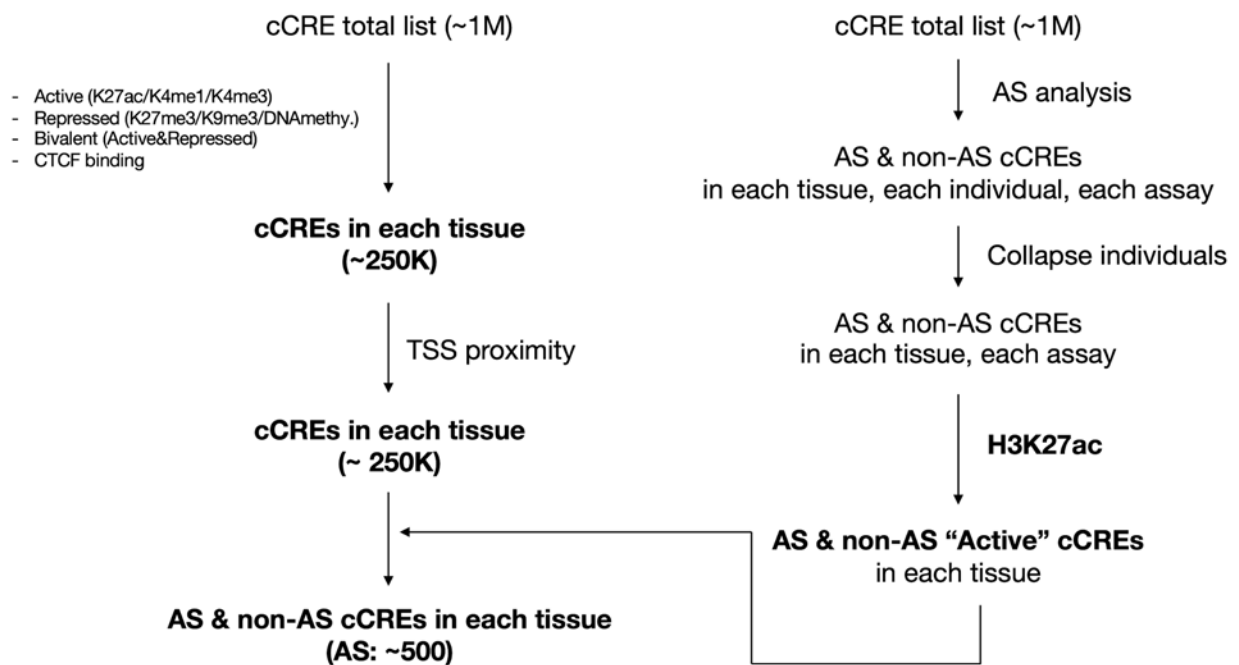

C

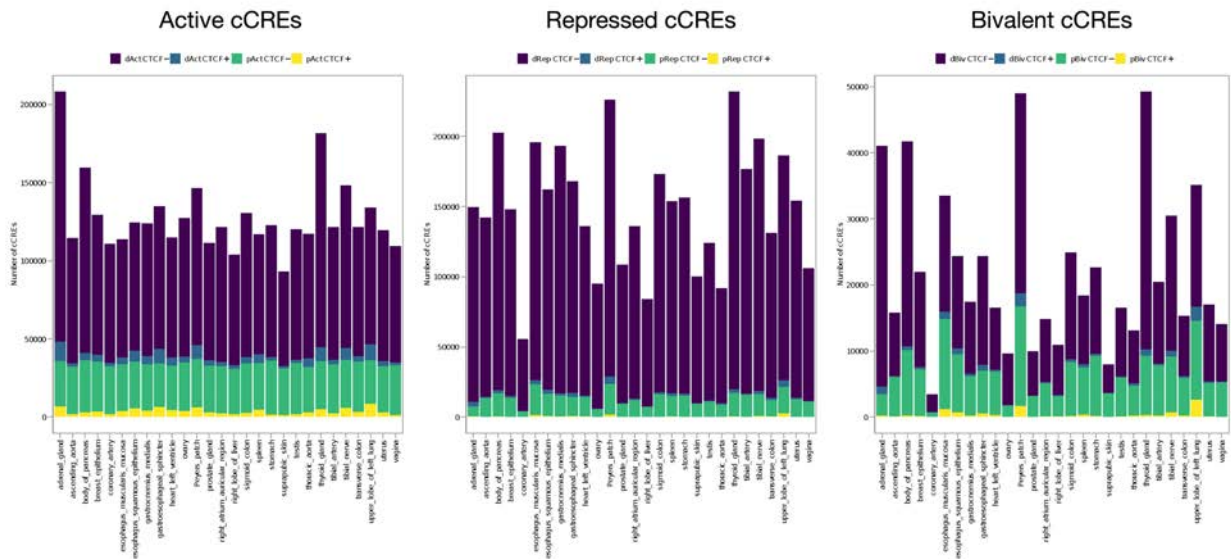

D

**Decoration of total cCREs**  
[active/bivalent/repressed],[distal/proximal].[CTCF/nonCTCF]-[TissueType]

**Decoration of cCREs with allelic signature**  
[active/repressed],[distal/proximal],[CTCF/nonCTCF].[AS/nonAS]-[TissueType]

| cCRE_id      | active.distal.CTCF |     |     | repressed_proximal.nonCTCF-vagina | active.distal.CTCF.AS-adrenal_gland |     |     | repressed_proximal.nonCTCF.nonAS-vagina |
|--------------|--------------------|-----|-----|-----------------------------------|-------------------------------------|-----|-----|-----------------------------------------|
|              | -adrenal_gland     | ... | ... |                                   | ...                                 | ... | ... |                                         |
| EH38E0001876 | 0                  | ... | ... | 0                                 | 0                                   | ... | ... | 0                                       |
| EH38E0004911 | 0                  | ... | ... | 0                                 | 0                                   | ... | ... | 0                                       |
| EH38E0005334 | 1                  | ... | ... | 0                                 | 0                                   | ... | ... | 0                                       |
| EH38E0006178 | 0                  | ... | ... | 1                                 | 0                                   | ... | ... | 1                                       |
| EH38E0006270 | 0                  | ... | ... | 1                                 | 0                                   | ... | ... | 1                                       |
| ...          | ...                | ... | ... | ...                               | ...                                 | ... | ... | ...                                     |
| ...          | ...                | ... | ... | ...                               | ...                                 | ... | ... | ...                                     |
| ...          | ...                | ... | ... | ...                               | ...                                 | ... | ... | ...                                     |
| ...          | ...                | ... | ... | ...                               | ...                                 | ... | ... | ...                                     |
| EH38E2776491 | 0                  | ... | ... | 0                                 | 0                                   | ... | ... | 0                                       |
| EH38E2776496 | 0                  | ... | ... | 0                                 | 0                                   | ... | ... | 0                                       |
| EH38E2776512 | 1                  | ... | ... | 0                                 | 0                                   | ... | ... | 0                                       |
| EH38E2776513 | 0                  | ... | ... | 0                                 | 0                                   | ... | ... | 0                                       |
| EH38E2776514 | 0                  | ... | ... | 0                                 | 0                                   | ... | ... | 0                                       |

890,906 cCREs

**Data S19. cCRE decoration, related to Figure 3, Figure S5, and STAR Methods “Decoration Process” Section**

(A) Data preprocessing. We computed the average signal for each cCRE region using the datasets from DNase-seq, ATAC-seq, and five histone modifications (H3K27ac, H3K4me1, H3K4me3, H3K27me3, and H3K9me3). For DNase-seq and ATAC-seq, the signals were

averaged across the genomic positions of the cCRE regions. The signals of histone modifications were averaged across the genomic positions of the cCRE regions with a 500 bp extended region on each side. For each assay, we performed quantile normalization on the average signal from the cCRE regions jointly across all of the biosamples. Then, we scaled the normalized signal from 1 to 10, and defined a set of “active” cCREs for each assay from each tissue type.

**(B)** Framework of cCRE decoration. We decorated the cCREs from the encyclopedia using the active and repressed histone modification signals and CTCF binding sites from tissues. The decorated cCREs were then separated into proximal and distal groups based on their proximity to the annotated TSSs. At another layer, these cCRE subgroups were further annotated as AS and non-AS based on their allelic signature.

**(C)** Number of cCREs in various tissues. This figure shows the number of different subgroups of decorated cCREs in each tissue type. In each panel, the colors indicate the TSS proximity (proximal vs. distal) and CTCF binding state (CTCF+ vs. CTCF-). Note that the decoration terms are defined in Figure S5A.

**(D)** cCRE decoration results matrix. We generated an annotation matrix for all the decorated cCREs from each tissue type.

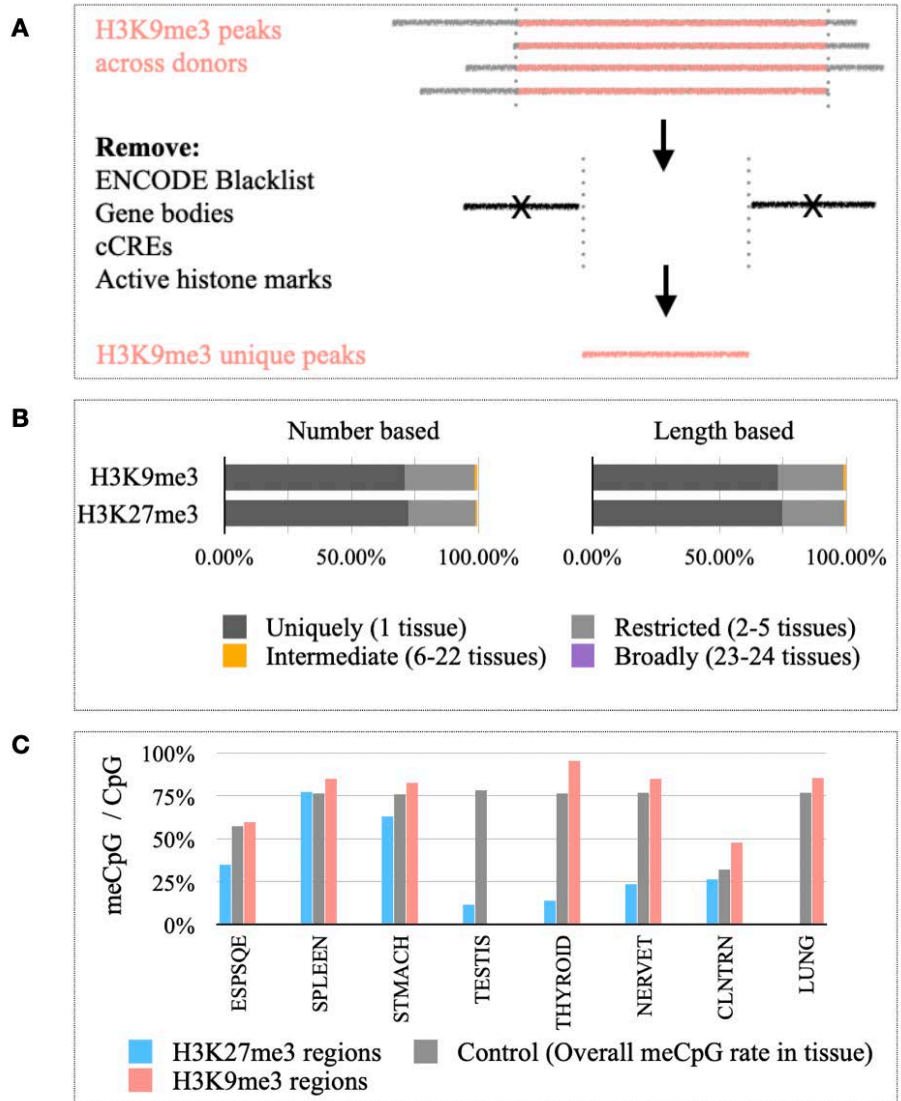

D

| Tissue                        | #TotalRepressive | #DNAm(=0) | #DNAm(=0.5) | #H3K27me3 | #H3K9me3 | #DNAm&H3K27me3 | #DNAm&H3K9me3 | %DNAm(=0) | %DNAm(=0.5) | %H3K27me3 | %H3K9me3 | %DNAm(=0.5)&H3K27me3 | %DNAm(=0.5)&H3K9me3 |
|-------------------------------|------------------|-----------|-------------|-----------|----------|----------------|---------------|-----------|-------------|-----------|----------|----------------------|---------------------|
| adrenal_gland                 | 156,348          | 84,627    | 61,180      | NA        | 964      | NA             | 71            | 41.30%    | 38.10%      | NA        | 0.60%    | NA                   | 0.00%               |
| ascending_aorta               | 156,274          | 78,021    | 60,960      | 20,818    | 5,603    | 2,088          | 650           | 50.20%    | 38.90%      | 13.20%    | 3.60%    | 1.30%                | 0.40%               |
| body_of_pancreas              | 220,484          | 91,768    | 71,892      | 14,241    | 3,124    | 1,187          | 388           | 41.60%    | 32.50%      | 6.50%     | 1.40%    | 0.50%                | 0.30%               |
| breast_epithelium             | 163,911          | 80,816    | 75,825      | 30,388    | 10,129   | 5,297          | 1,471         | 55.40%    | 46.30%      | 18.50%    | 6.20%    | 3.20%                | 0.80%               |
| coronary_artery               | 58,788           | 56,788    | 56,778      | NA        | NA       | NA             | NA            | 100.00%   | 100.00%     | NA        | NA       | NA                   | NA                  |
| esophagus_muscularis_mucosa   | 221,989          | 104,029   | 72,680      | 47,838    | 9,567    | 8,065          | 1,200         | 46.90%    | 32.70%      | 21.50%    | 4.20%    | 3.60%                | 0.50%               |
| esophagus_squamous_epithelium | 181,841          | 80,483    | 38,011      | 44,982    | 8,826    | 8,283          | 1,312         | 44.30%    | 32.50%      | 24.60%    | 4.80%    | 4.60%                | 0.70%               |
| gastrocnemius_medialis        | 215,558          | 88,415    | 67,912      | 45,425    | 3,804    | 6,796          | 451           | 41.10%    | 31.40%      | 21.10%    | 1.60%    | 3.20%                | 0.20%               |
| gastroesophageal_sphincter    | 184,805          | 88,583    | 70,794      | 38,429    | 11,576   | 7,130          | 1,535         | 47.90%    | 38.30%      | 19.70%    | 6.30%    | 3.90%                | 0.80%               |
| heart_left_ventricle          | 152,576          | 83,059    | 64,017      | 28,953    | 7,958    | 2,728          | 985           | 54.40%    | 42.00%      | 19.00%    | 5.20%    | 1.80%                | 0.60%               |
| lower_leg_skin                | 51,003           | 51,003    | 50,999      | NA        | NA       | NA             | NA            | 100.00%   | 100.00%     | NA        | NA       | NA                   | NA                  |
| ovary                         | 98,107           | 64,563    | 62,598      | NA        | 173      | NA             | 28            | 65.80%    | 63.80%      | NA        | 0.20%    | NA                   | 0.00%               |
| Peyers_patch                  | 251,668          | 101,002   | 72,016      | 16,847    | 5,284    | 1,241          | 856           | 40.10%    | 28.60%      | 6.70%     | 2.10%    | 0.50%                | 0.30%               |
| prostate_gland                | 117,491          | 70,663    | 59,865      | 11,231    | 54       | 1,051          | 4             | 60.10%    | 51.00%      | 0.60%     | 0.00%    | 0.90%                | 0.00%               |
| right_atrium_auricular_region | 150,042          | 70,187    | 53,980      | 15,127    | 7,826    | 891            | 877           | 46.80%    | 36.00%      | 10.10%    | 5.10%    | 0.60%                | 0.80%               |
| right_lobe_of_liver           | 66,640           | 55,308    | 50,919      | NA        | 270      | NA             | 37            | 83.80%    | 58.80%      | NA        | 0.30%    | NA                   | 0.00%               |
| sigmoid_colon                 | 192,491          | 91,807    | 70,228      | 37,689    | 3,450    | 5,871          | 433           | 47.80%    | 38.70%      | 18.80%    | 1.80%    | 2.80%                | 0.20%               |
| spleen                        | 176,796          | 93,783    | 73,775      | 45,782    | 28,548   | 10,451         | 3,843         | 53.10%    | 41.70%      | 25.90%    | 16.00%   | 5.90%                | 2.10%               |
| stomach                       | 177,408          | 82,446    | 58,741      | 44,645    | 19,028   | 6,912          | 2,387         | 46.50%    | 33.70%      | 25.20%    | 3.90%    | 1.30%                | 0.60%               |
| suprapubic_skin               | 112,564          | 66,842    | 53,222      | 28,703    | 3,400    | 4,196          | 421           | 59.40%    | 47.30%      | 25.50%    | 3.00%    | 3.70%                | 0.40%               |
| testis                        | 134,229          | 72,952    | 58,924      | 3,470     | 24       | 83             | 2             | 54.30%    | 43.90%      | 2.60%     | 0.10%    | 0.00%                | 0.00%               |
| thoracic_aorta                | 98,590           | NA        | NA          | 5,585     | 3,218    | NA             | NA            | NA        | NA          | 5.70%     | 3.20%    | NA                   | NA                  |
| thyroid_gland                 | 252,668          | 99,281    | 82,411      | 13,820    | 411      | 908            | 38            | 39.40%    | 32.70%      | 3.90%     | 0.20%    | 0.40%                | 0.00%               |
| tibial_artery                 | 196,188          | 94,030    | 73,777      | 41,688    | 8,098    | 7,791          | 1,082         | 47.90%    | 37.60%      | 21.20%    | 4.10%    | 4.00%                | 0.60%               |
| tibial_nerve                  | 221,297          | 85,268    | 62,117      | 41,283    | 16,389   | 5,877          | 2,284         | 38.50%    | 28.10%      | 18.70%    | 7.40%    | 2.70%                | 1.00%               |
| transverse_colon              | 149,756          | 76,276    | 56,579      | 35,375    | 2,902    | 4,490          | 387           | 50.90%    | 30.10%      | 23.60%    | 1.90%    | 3.00%                | 0.30%               |
| upper_lobe_of_left_lung       | 212,200          | 95,194    | 85,880      | 29,742    | 8,045    | 2,308          | 1,122         | 44.90%    | 30.90%      | 14.60%    | 3.80%    | 1.10%                | 0.80%               |
| uterus                        | 187,081          | 78,725    | 63,062      | 14,554    | 1,881    | 1,189          | 202           | 47.10%    | 38.10%      | 8.70%     | 1.10%    | 0.70%                | 0.30%               |
| vagina                        | 116,582          | 70,527    | 57,893      | 5,202     | 1,351    | 238            | 177           | 61.00%    | 49.90%      | 4.50%     | 1.20%    | 0.20%                | 0.30%               |

E

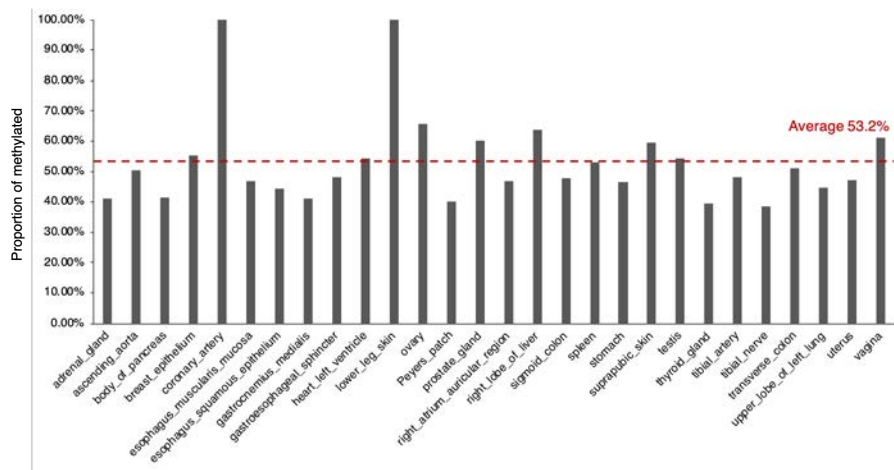

**Data S20. Identifying repressed elements, related to Figure 3 and STAR Methods “Decoration Process” Section**

(A) For genomic regions outside of cCREs and annotated genes, elements longer than 200 bp that are uniquely marked by either H3K9me3 or H3K27me3 were defined as fully repressed. A total of 45,207 (covering 12,655,795 bp) and 24,006 (covering 7,474,178 bp) non-overlapping elements were identified based on H3K9me3 and H3K27me3, respectively.

(B) The majority of these elements were repressed in a tissue-specific manner.

(C) For tissues with available datasets, DNA methylation within these elements was evaluated, and H3K9me3-marked elements showed a significantly (t-test, p-value < 0.05) higher CpG methylation (meCpG) rate than elements marked uniquely by H3K27me3.

(D) Number and proportion of repressed cCREs that overlap with the repressive histone marks and/or DNA methylation in each tissue type.

(E) The proportion of repressed cCREs that overlap with DNA methylation in each tissue type.



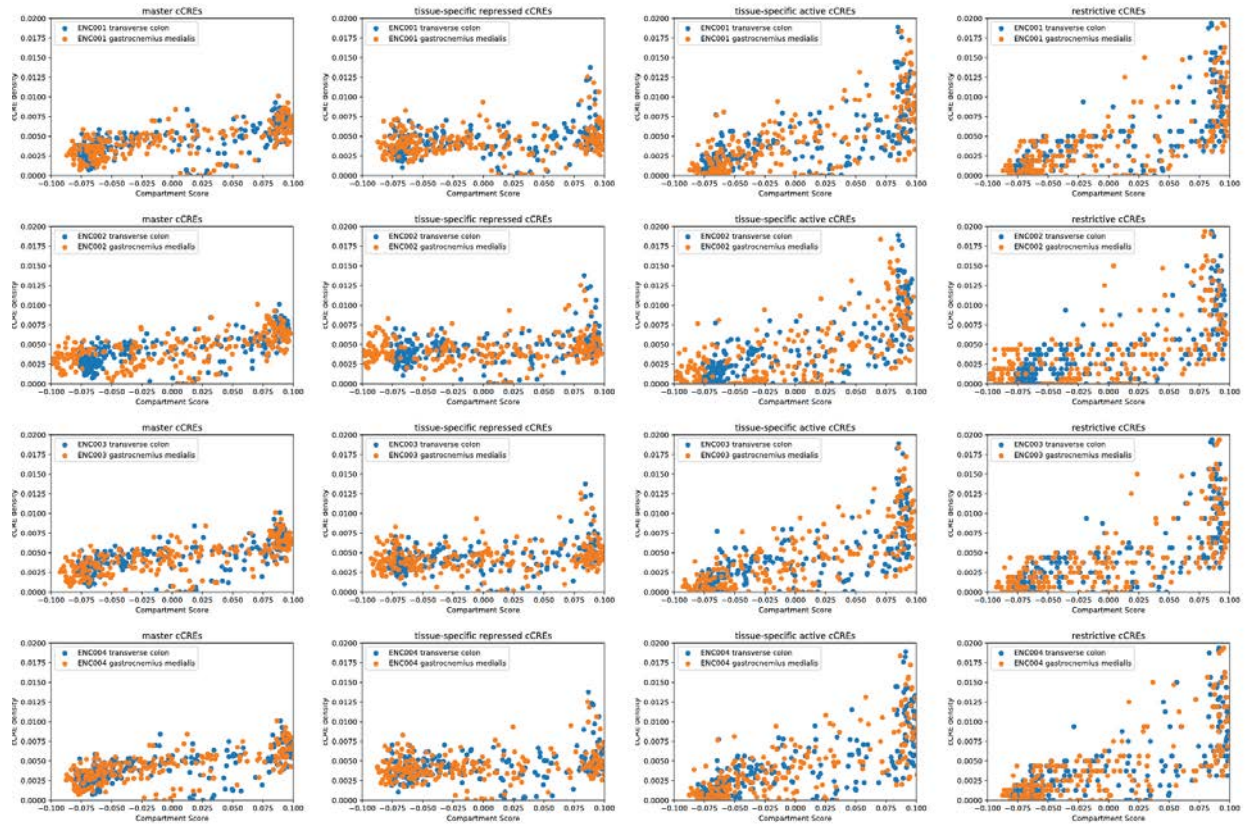

**Data S21. cCRE enrichment with respect to A/B compartments “Decoration Process” Section**

These plots show the cCRE enrichment in the A vs. B compartment of two different tissues. We show this for the master cCRE list from ENCODE, including both tissue-specific active and repressed cCREs. As the tissue specificity increases, the cCRE enrichment in the active A compartment increases compared with the inactive B compartment.

**A**

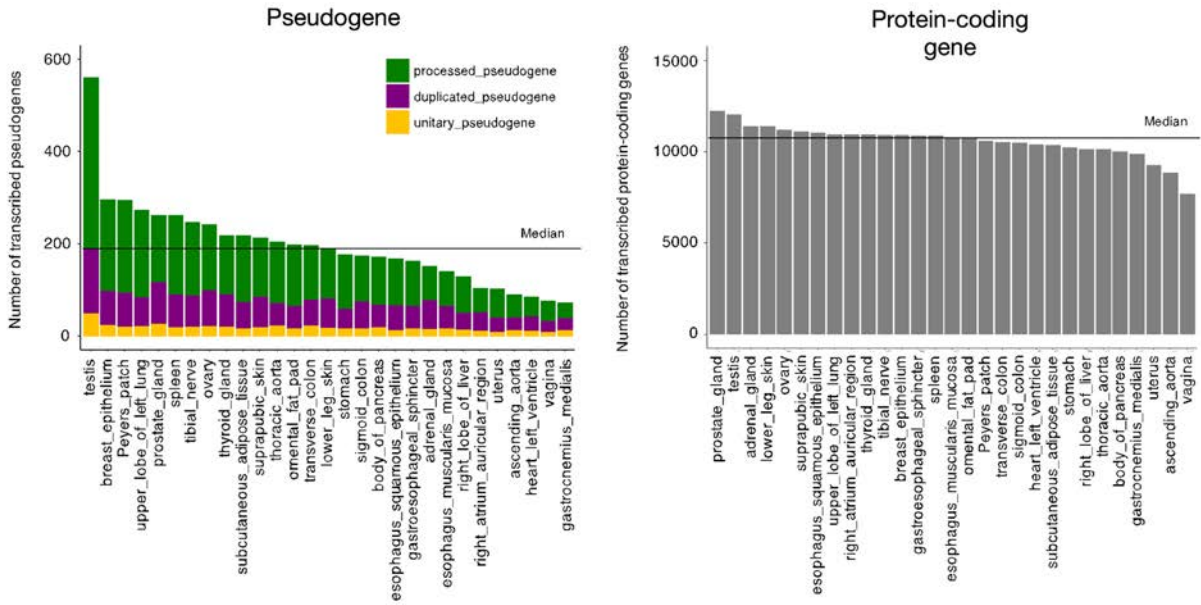

**B**

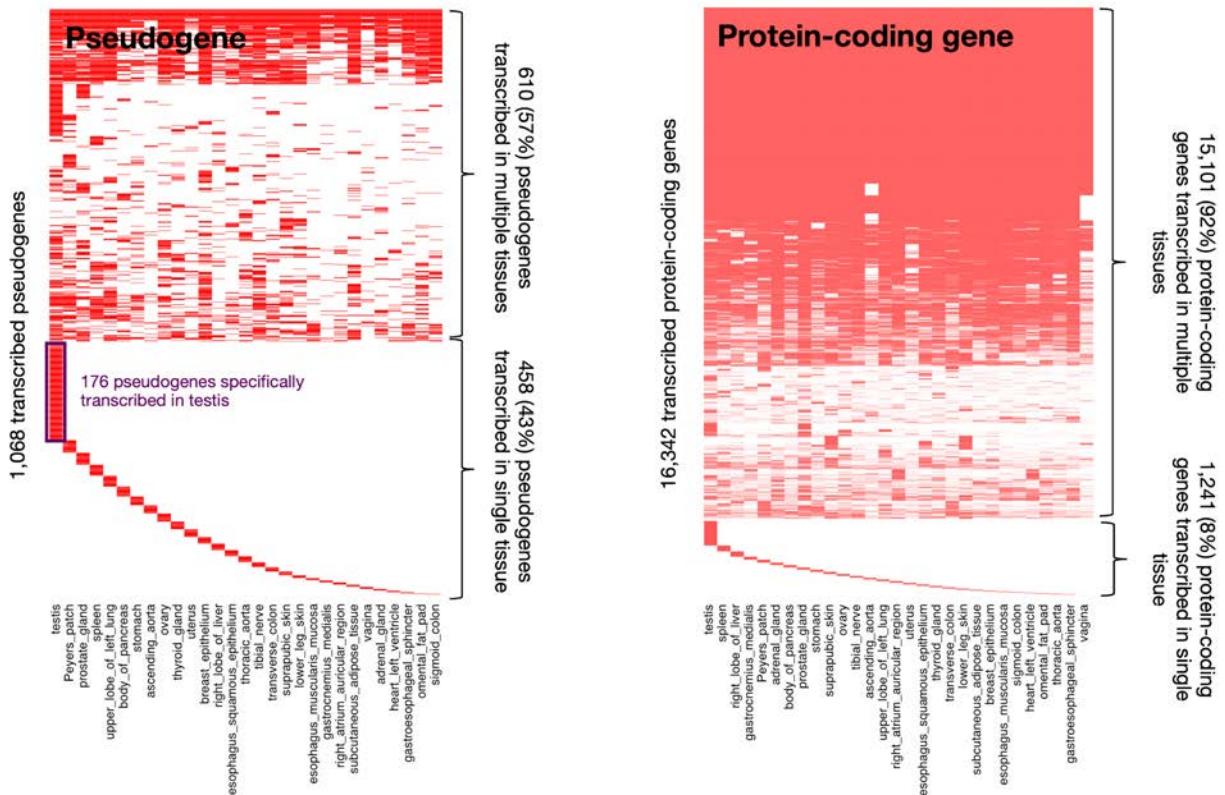

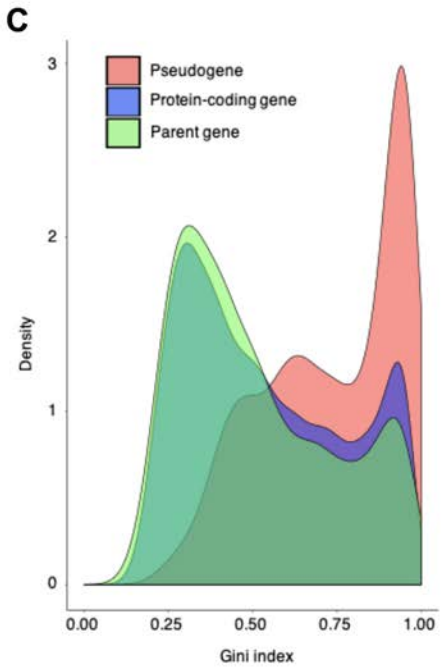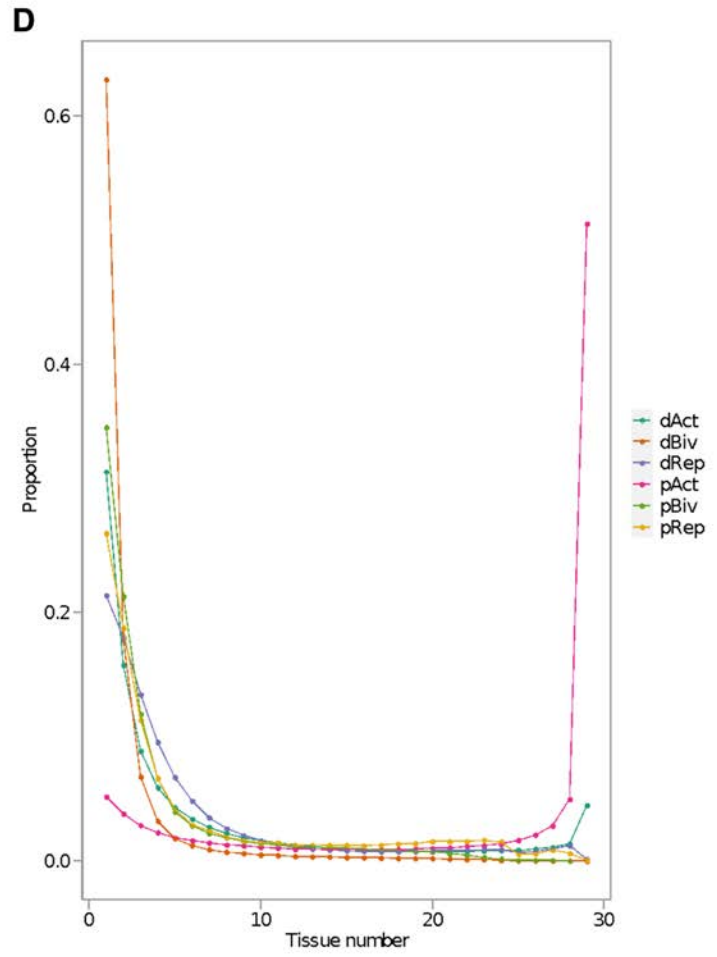

E

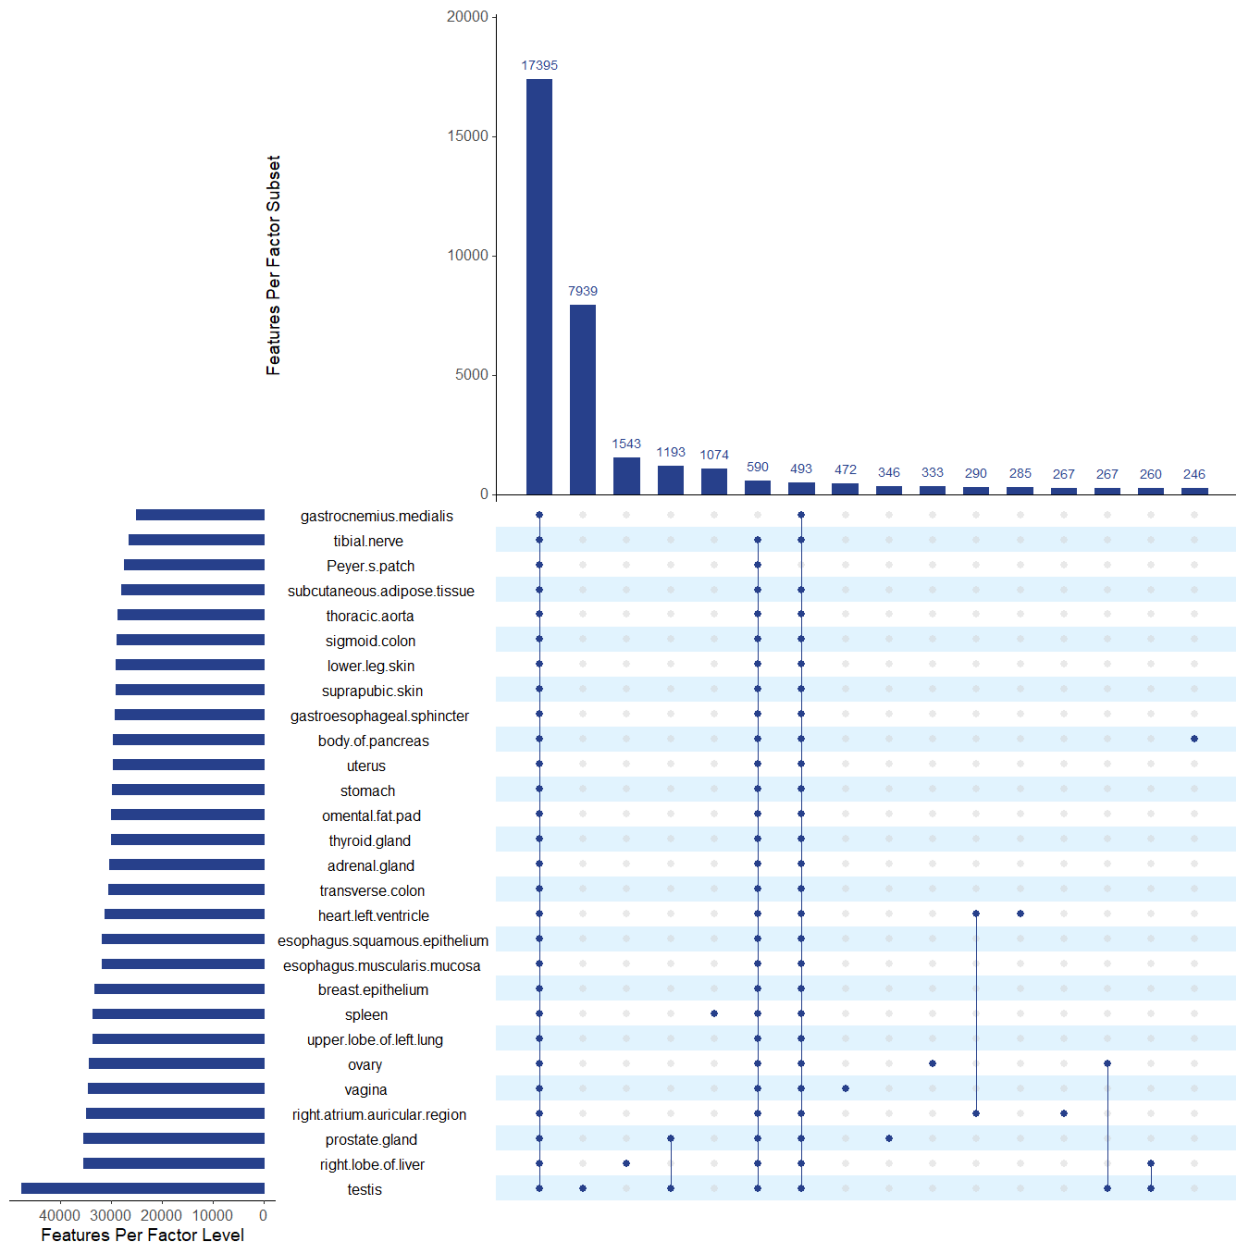

F

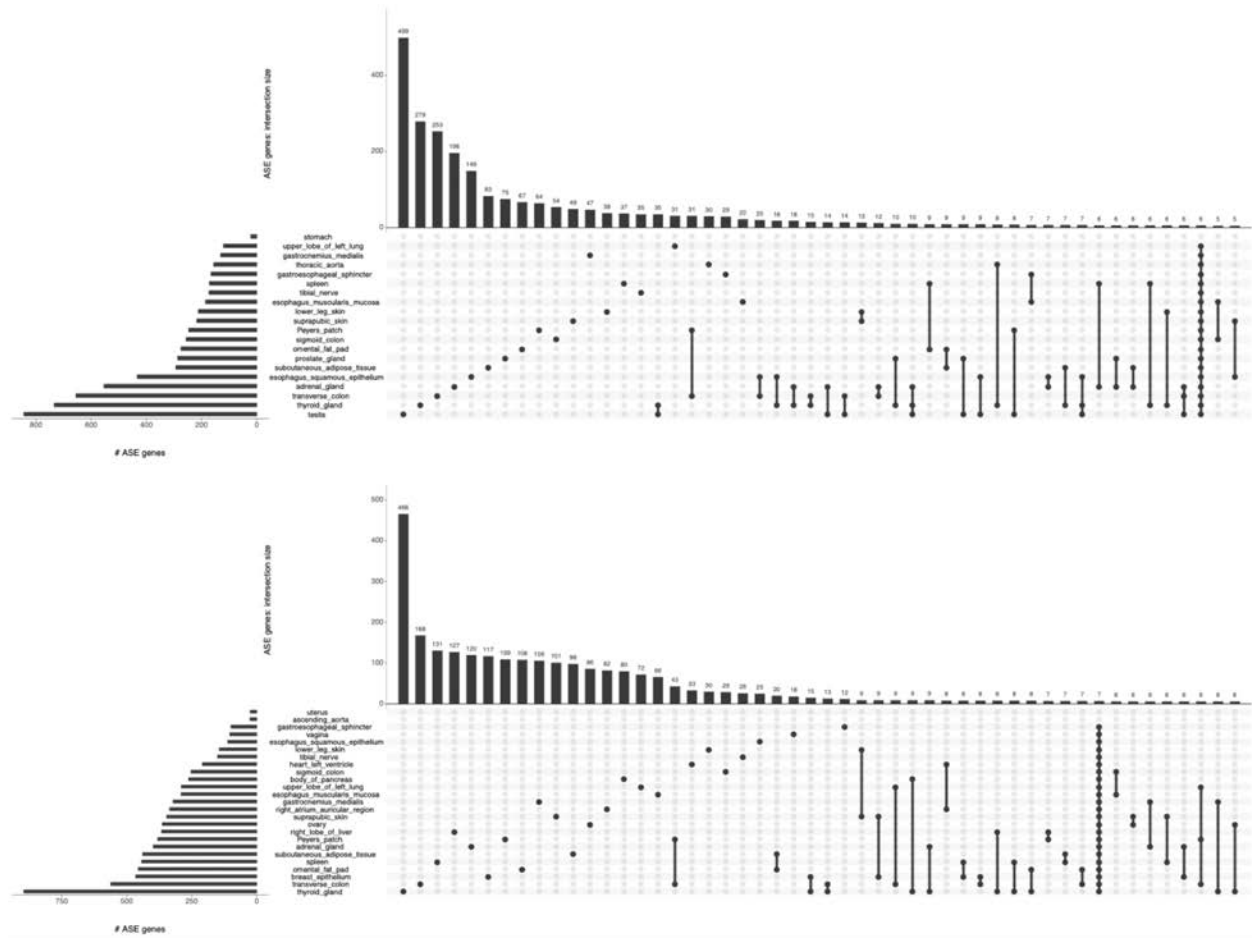

G

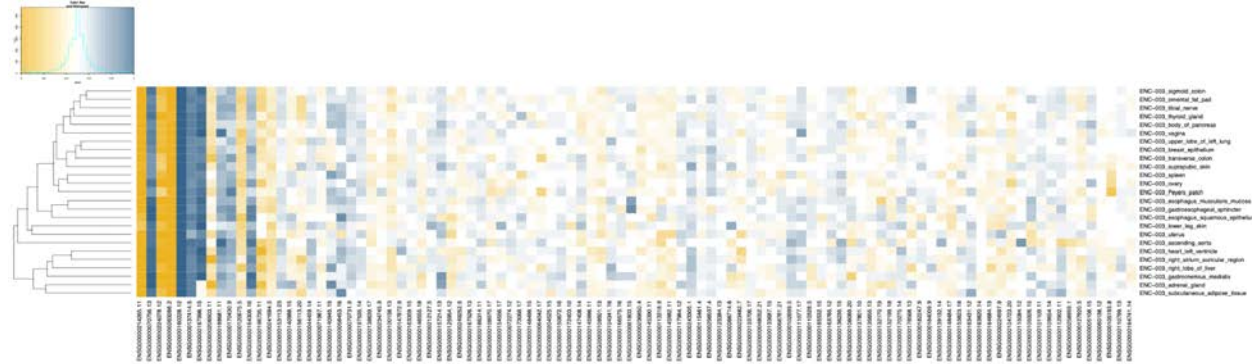



# H

| cCRE ID      | cCRE Type       | cCRE Coordinate          | Regulatory Build | Associated Gene Name | Gene Type      | Housekeeping Gene |
|--------------|-----------------|--------------------------|------------------|----------------------|----------------|-------------------|
| EH38D2450505 | pELS_CTCF_bound | chr11_47642297_47642476  | Promoter         | MTCH2                | Protein coding | Yes               |
| EH38D2768300 | pELS_CTCF_bound | chr15_24956163_24956513  | Promoter         | SNRPN                | Protein coding | /                 |
| EH38D2900035 | PLS_CTCF_bound  | chr17_1455938_1456100    | Promoter         | CRK                  | Protein coding | Yes               |
| EH38D2901207 | pELS_CTCF_bound | chr17_2401937_2402232    | Promoter         | MNT                  | Protein coding | /                 |
| EH38D2916215 | dELS_CTCF_bound | chr17_19507807_19508157  | /                | /                    | /              | /                 |
| EH38D2933500 | pELS_CTCF_bound | chr17_43360380_43360725  | Promoter         | LINC00910            | LncRNA         | /                 |
| EH38D3043965 | pELS_CTCF_bound | chr19_14005711_14006060  | Promoter         | RFX1                 | Protein coding | /                 |
| EH38D3061913 | pELS_CTCF_bound | chr19_40425366_40425529  | Promoter         | SERTAD1              | Protein coding | /                 |
| EH38D3112234 | pELS_CTCF_bound | chr2_39436701_39437019   | Promoter         | MAP4K3               | Protein coding | /                 |
| EH38D3214874 | PLS_CTCF_bound  | chr2_178451090_178451434 | Promoter         | PRKRA                | Protein coding | Yes               |
| EH38D3218481 | PLS_CTCF_bound  | chr2_183038344_183038694 | Promoter         | NCKAP1               | Protein coding | /                 |
| EH38D3320686 | pELS_CTCF_bound | chr20_62652500_62652832  | Promoter         | SLCO4A1              | Protein coding | /                 |
| EH38D3374502 | dELS_CTCF_bound | chr22_41414017_41414333  | /                | /                    | /              | /                 |
| EH38D3375755 | pELS_CTCF_bound | chr22_42614566_42614721  | Promoter         | POLDIP3              | Protein coding | /                 |
| EH38D3448294 | PLS_CTCF_bound  | chr3_75785373_75785718   | Promoter         | ZNF717               | Protein coding | /                 |
| EH38D3802403 | pELS_CTCF_bound | chr6_291711_292043       | Promoter         | DUSP22               | Protein coding | Yes               |
| EH38D3802406 | pELS_CTCF_bound | chr6_292649_292999       | Promoter         | DUSP22               | Protein coding | Yes               |
| EH38D3819578 | pELS_CTCF_bound | chr6_17600685_17600980   | Promoter         | FAM8A1               | Protein coding | Yes               |
| EH38D3829720 | PLS_CTCF_bound  | chr6_29888019_29888233   | Promoter         | HLA-H                | Pseudo         | /                 |
| EH38D3829827 | pELS_CTCF_bound | chr6_29976507_29976854   | Promoter         | HCG9                 | LncRNA         | /                 |
| EH38D3829829 | dELS_CTCF_bound | chr6_29977252_29977415   | Promoter         | HCG9                 | LncRNA         | /                 |
| EH38D4038383 | pELS_CTCF_bound | chr7_139341640_139341807 | Promoter         | FMC1-LUC7L2          | Protein coding | /                 |
| EH38D4168415 | pELS_CTCF_bound | chr9_6007913_6008223     | Promoter         | KIAA2026             | Protein coding | /                 |

I

| GENCODE ID         | Gene Name     | Gene Type      | Housekeeping Gene |
|--------------------|---------------|----------------|-------------------|
| ENSG00000070756.13 | PABPC1        | Protein coding | Yes               |
| ENSG00000084623.11 | EIF3I         | Protein coding | Yes               |
| ENSG00000090372.14 | STRN4         | Protein coding | Yes               |
| ENSG00000109919.9  | MTCH2         | Protein coding | Yes               |
| ENSG00000119669.4  | IRF2BPL       | Protein coding | Yes               |
| ENSG00000122026.10 | RPL21         | Protein coding | Yes               |
| ENSG00000122884.12 | P4HA1         | Protein coding | /                 |
| ENSG00000130844.16 | ZNF331        | Protein coding | /                 |
| ENSG00000137414.5  | FAM8A1        | Protein coding | Yes               |
| ENSG00000151233.10 | GXYLT1        | Protein coding | /                 |
| ENSG00000167996.15 | FTH1          | Protein coding | /                 |
| ENSG00000180228.12 | PRKRA         | Protein coding | Yes               |
| ENSG00000187840.4  | EIF4EBP1      | Protein coding | /                 |
| ENSG00000204186.7  | ZDBF2         | Protein coding | /                 |
| ENSG00000214265.11 | RP11-701H24.9 | Protein coding | /                 |
| ENSG00000224078.12 | SNHG14        | ncRNA          | /                 |
| ENSG00000227124.8  | ZNF717        | Protein coding | /                 |
| ENSG00000232653.8  | GOLGA8N       | Protein coding | /                 |
| ENSG00000258186.2  | SLC7A5P2      | Pseudo         | /                 |
| ENSG00000263266.2  | RPS7P1        | Pseudo         | /                 |



J

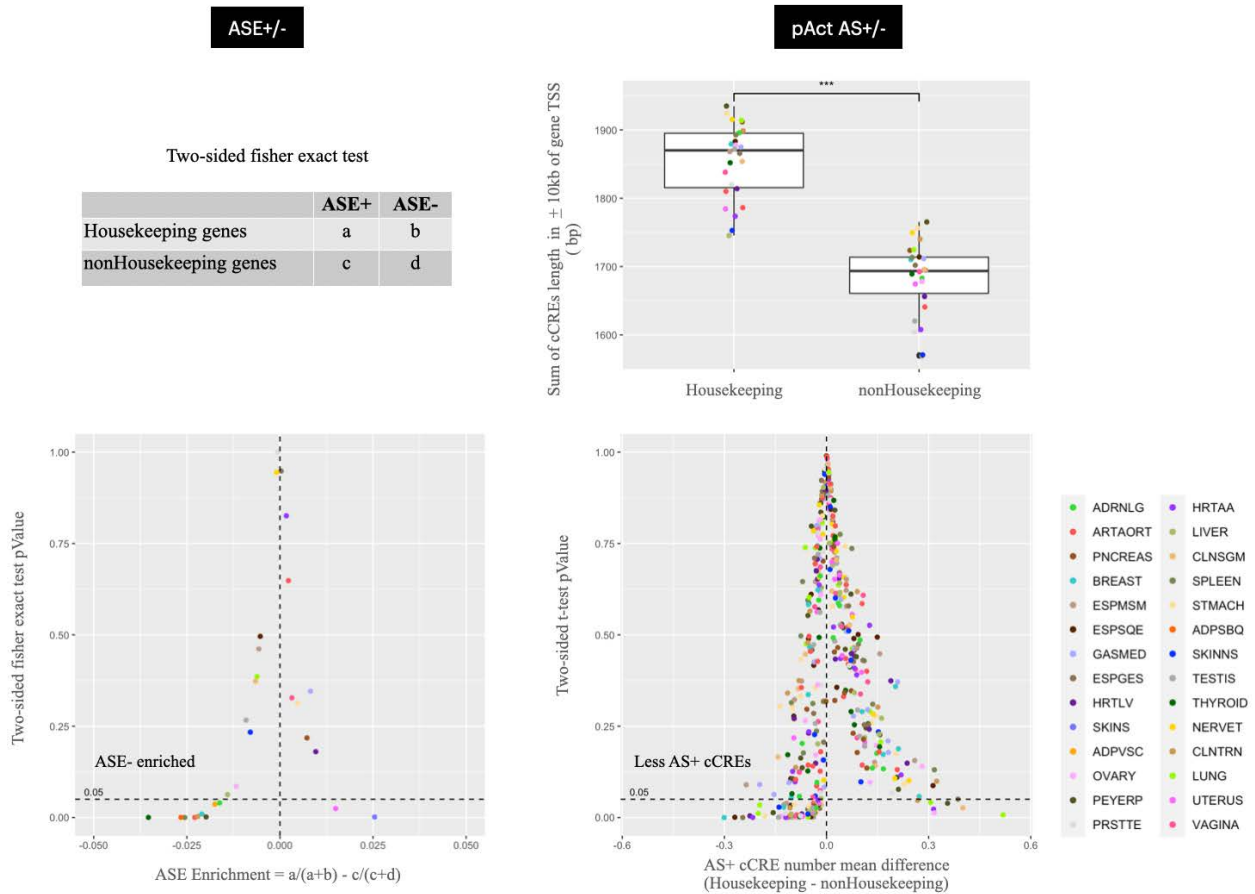

**Data S22. Tissue specificity of AS events, related to Figure 3, Figure S5, and STAR Methods “Tissue Specificity” Section**

**(A)** The number of transcribed genes in tissues. This figure shows the number of transcribed pseudogenes (left) and protein-coding genes (right) across all tissue types. The median of the transcribed pseudogenes and protein-coding genes across the tissues is 200 and ~11K, respectively.

**(B)** Tissue specificity of transcribed genes. The heatmaps show the activity of pseudogenes (left) and protein-coding genes (right) across tissue types. In each tissue, the pseudogenes/protein-coding genes are classified as actively transcribed (shown in red) or not based on their expression level.

**(C)** Gini index of gene expression level across tissues. We applied the Gini index to quantify the tissue specificity of protein-coding genes, pseudogenes, and parent genes based on their expression level. The pseudogenes show higher Gini indexes than the protein-coding genes, suggesting stronger tissue specificity of pseudogenes. The Gini index distribution of the pseudogenes is quite different from that of the parent genes, confirming that the multi-mapping bias from quantification of the pseudogene expression level has been minimized.

**(D)** Tissue specificity of different subgroups of cCREs. For each cCRE subgroup, we show the proportion of the cCREs that are defined as “active” across the different numbers of tissue types ranging from one (i.e., high tissue specificity) to all tissue types (i.e., low tissue specificity). Note that the decoration terms are defined in Figure S5A.

**(E)** Tissue specificity of RAMPAGE data at TSSs of protein-coding genes. This figure shows an UpSet plot of counts of GENCODE TSSs of genes (vertical bars), measured using RAMPAGE data in combinations of tissues (sets of dots), sorted by the number of TSSs. Bars on the left correspond to the number of TSSs in each tissue. Ubiquitously expressed TSSs using RAMPAGE are the most abundant.

**(F)** ASE genes across different tissues of individual 2 (top) and 3 (bottom). Counts of genes (bars) with detected ASE in the combinations of tissues (sets of dots) with the largest number of common AS genes. Bars on the left correspond to the number of AS genes in each tissue.

**(G)** Hap1 allele ratios (number of hap1 reads over the total number of reads) for expression of genes that are accessible across all tissues and AS in at least one tissue of individual 3. This figure parallels the allelic ratios for H3K27ac in Figure 3F and shows the same trend for expression as for histone modification. Note in Figure 3F, we did not find any significant bias in GO enrichment or in the chromosomal distribution of genes targeted by cCREs that flip imbalance direction across tissues. The allelic imbalance is measured by the fraction of unique reads mapped to each haplotype.

**(H)** Annotation of pan-tissue H3K27ac AS cCREs of individual 3. Among the 23 H3K27ac AS cCREs that were detected across all available tissues of individual 3, 21 cCREs are within promoter regions of known genes, including six promoters of housekeeping genes. Promoters and associated genes are based on Ensembl, and housekeeping genes are based on the HRT Atlas <sup>19</sup>.

**(I)** Annotation of pan-tissue ASE genes of individual 3. Among the 20 ASE genes that were detected across at least 90% of available tissues of individual 3, eight genes are annotated as housekeeping genes in the HRT Atlas.

**(J)** Allelic specificity of housekeeping genes. Left: for each tissue, expressed protein-coding genes were split into housekeeping genes and non-housekeeping genes. Based on the two-sided Fisher's exact test, housekeeping genes are generally expressed in less of an AS fashion than non-housekeeping genes. Right: for each tissue, we examined the allele specificity of pAct cCREs flanking the TSS (defined by the gene starting site) of housekeeping genes. To eliminate the bias caused by significantly different cCRE lengths flanking the genes, we split genes into 20 bins based on the total length of the flanking cCREs. Within each bin, the number of pAct AS cCREs was compared between the housekeeping and non-housekeeping genes. pAct cCREs flanking the housekeeping genes display relatively less allele specificity than the ones flanking non-housekeeping genes.

A

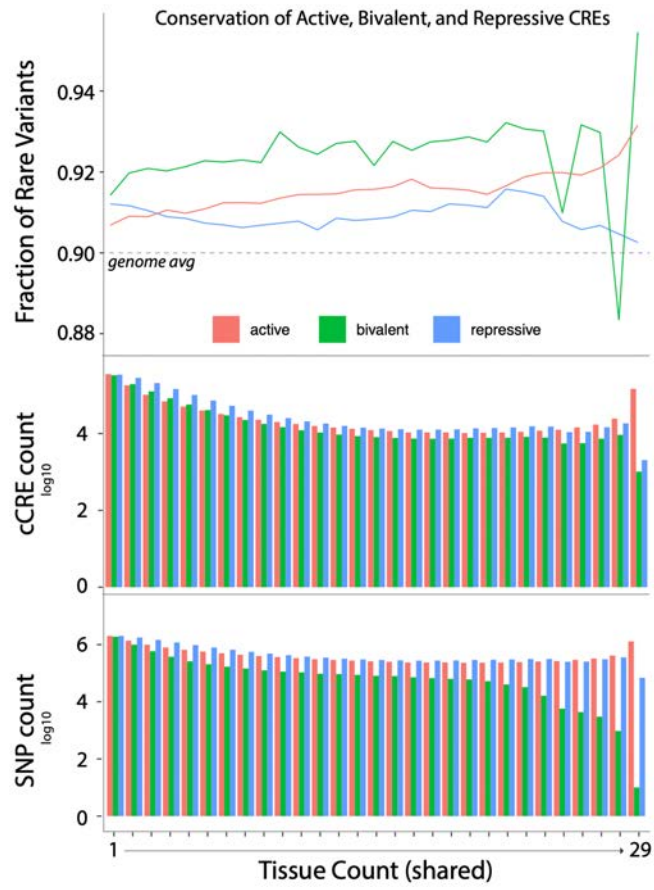

**B**

**Conservation Analysis of Enhancer Decorations**

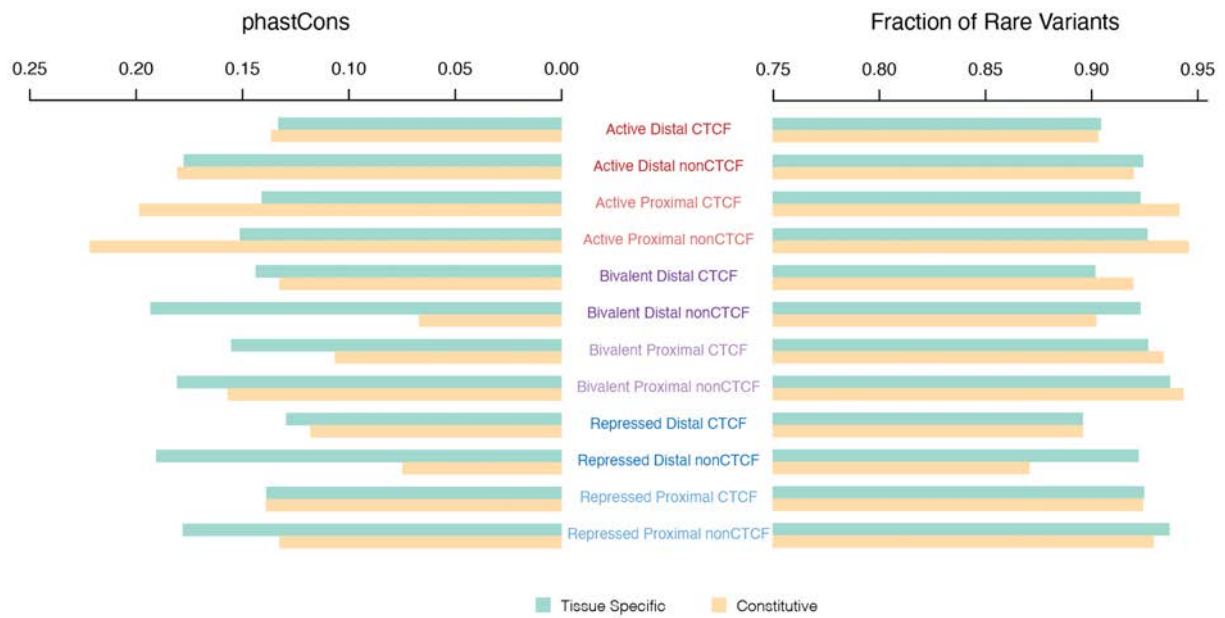

**C**

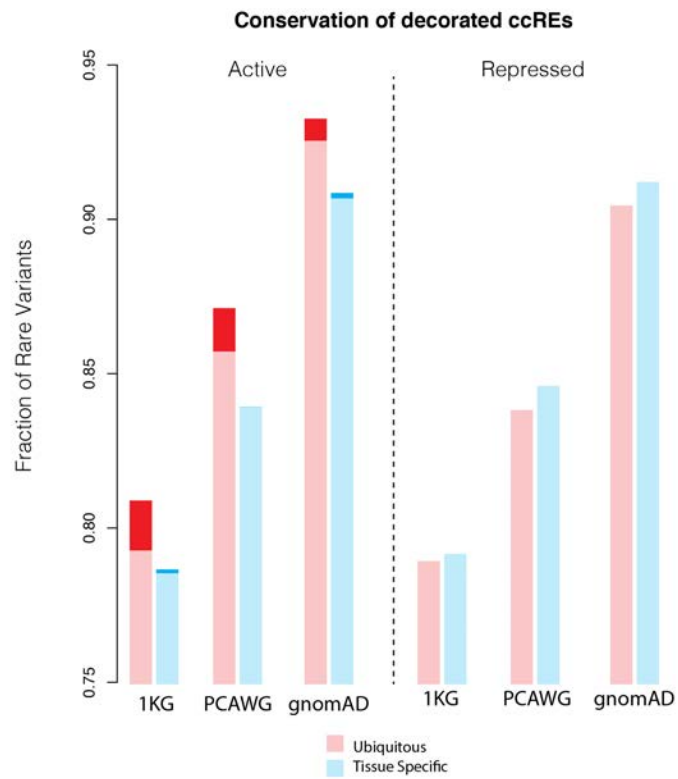

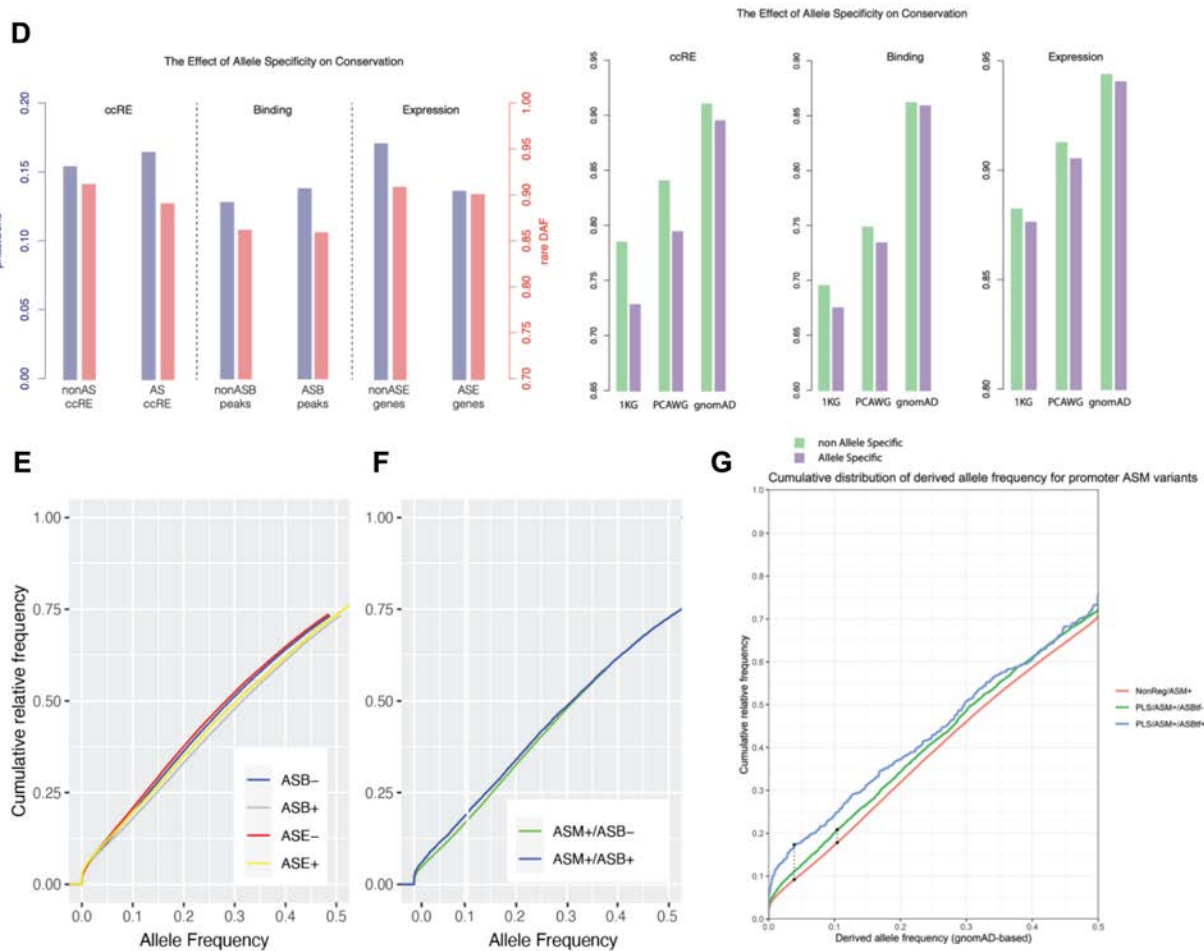

**Data S23. Conservation of cCREs, related to Figure 3 and STAR Methods “Tissue Specificity” Section**

**(A)** Rare derived allele frequency (DAF) for active, bivalent, and repressed cCREs in increasing tissue count. Fraction of rare variants was calculated as # rare variants / (# rare variants + # common variants). Total cCRE and SNP (taking into account all SNPs, common and rare) counts are shown for tissue count as well. We additionally performed a more in-depth analysis on the correlation as shown in Figure 3. We show the correlation for tissue specificity and conservation for active, bivalent, and repressed methylation groups of cCREs. The correlations are -0.90, 0.05, and 0.84 and the p-values are 1.9e-11, 0.60, and 9.76e-9, respectively.

**(B)** Conservation of enhancer decorations. The conservation was calculated in terms of the phastCons score and fraction of rare variants, based on the DAF in the gnomAD database. The annotations are from Figure S5A.

**(C)** Conservation of active and repressed cCREs for tissue-specific and ubiquitous categories. Dark red shows an increase in conservation for more stringently defined cCREs (selected via the top 1% of Matched Filter signals; see STAR Methods “Tissue Specificity” Section). The databases for this calculation include 1,000 Genomes (1KG), the Pan-Cancer Analysis of Whole Genomes (PCAWG), and gnomAD.

**(D) - (G)** Conservation of regions exhibiting AS activity. (A) The conservation of various AS annotations was calculated using phastCons and the fraction of rare variants based on different

population variants. Specifically, we considered AS/non-AS cCREs, ASB/non-ASB peaks from H3K27ac, and AS/non-AS genes. An alternate way to observe the same phenomenon is to determine the cumulative relative frequency of variants, shown in (B). Here, we see that non-AS events demonstrate stronger purifying selection than AS events, shown by the higher cumulative frequency curve. However, ASM/ASB variants demonstrate more consistency and higher purifying selection as compared to ASM/non-ASB events, shown in (C). Finally, in (D) we show that the effect in (C) is amplified when exclusively considering promoter regions.

A

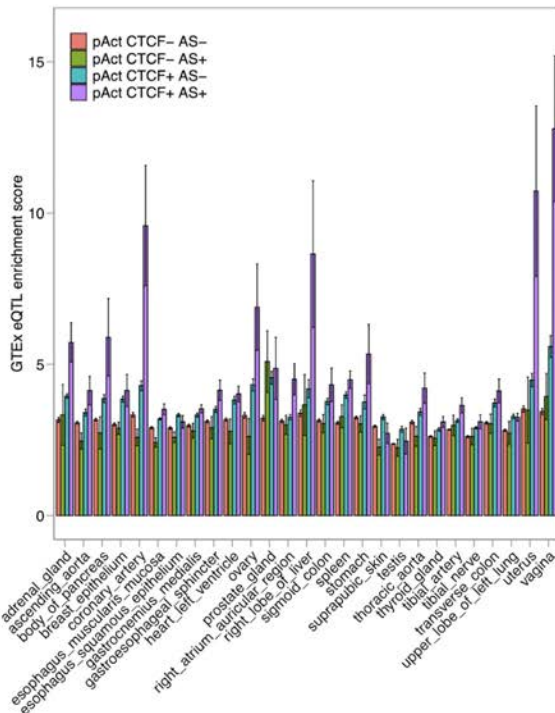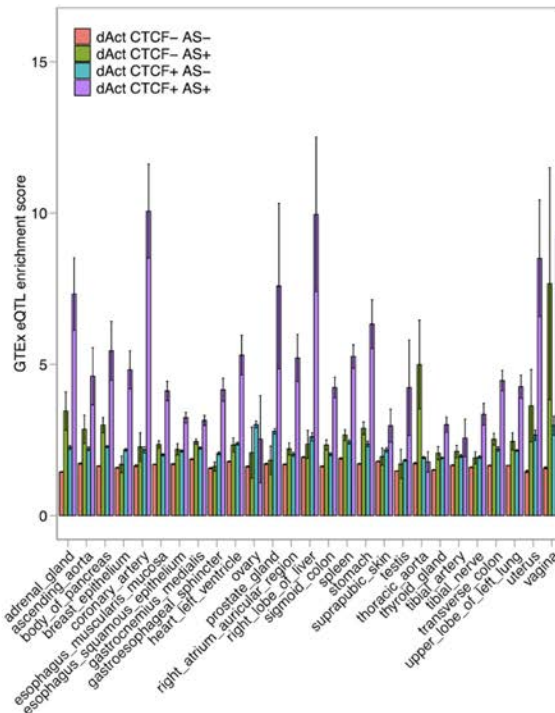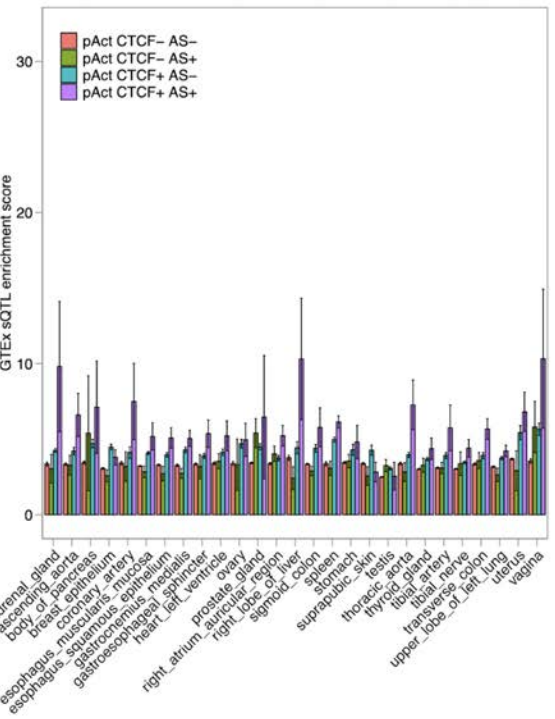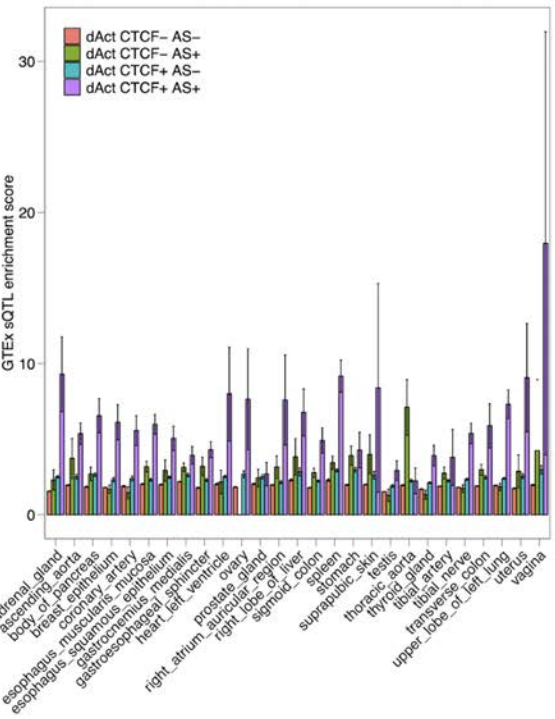



**B**

| Roadmap_ID | Roadmap_name                      | EN-Tex_name                   | GTex_name                      |
|------------|-----------------------------------|-------------------------------|--------------------------------|
| E065       | Aorta                             | ascending_aorta               | Artery_Aorta                   |
| E098       | Pancreas                          | body_of_pancreas              | Pancreas                       |
| E119       | HMEC Mammary Epithelial Primary C | breast_epithelium             | Breast_Mammary_Tissue          |
| E079       | Esophagus                         | esophagus_muscularis_muco     | Esophagus_Muscularis           |
| E107       | Skeletal Muscle Male              | gastrocnemius_medialis        | Muscle_Skeletal                |
| E095       | Left Ventricle                    | heart_left_ventricle          | Heart_Left_Ventricle           |
| E097       | Ovary                             | ovary                         | Ovary                          |
| E109       | Small Intestine                   | Peyers_patch                  | Small_Intestine_Terminal_Ileum |
| E104       | Right Atrium                      | right_atrium_auricular_region | Heart_Atrial_Appendage         |
| E066       | Liver                             | right_lobe_of_liver           | Liver                          |
| E106       | Sigmoid Colon                     | sigmoid_colon                 | Colon_Sigmoid                  |
| E113       | Spleen                            | spleen                        | Spleen                         |
| E094       | Gastric                           | stomach                       | Stomach                        |
| E096       | Lung                              | upper_lobe_of_lung            | Lung                           |

**C**

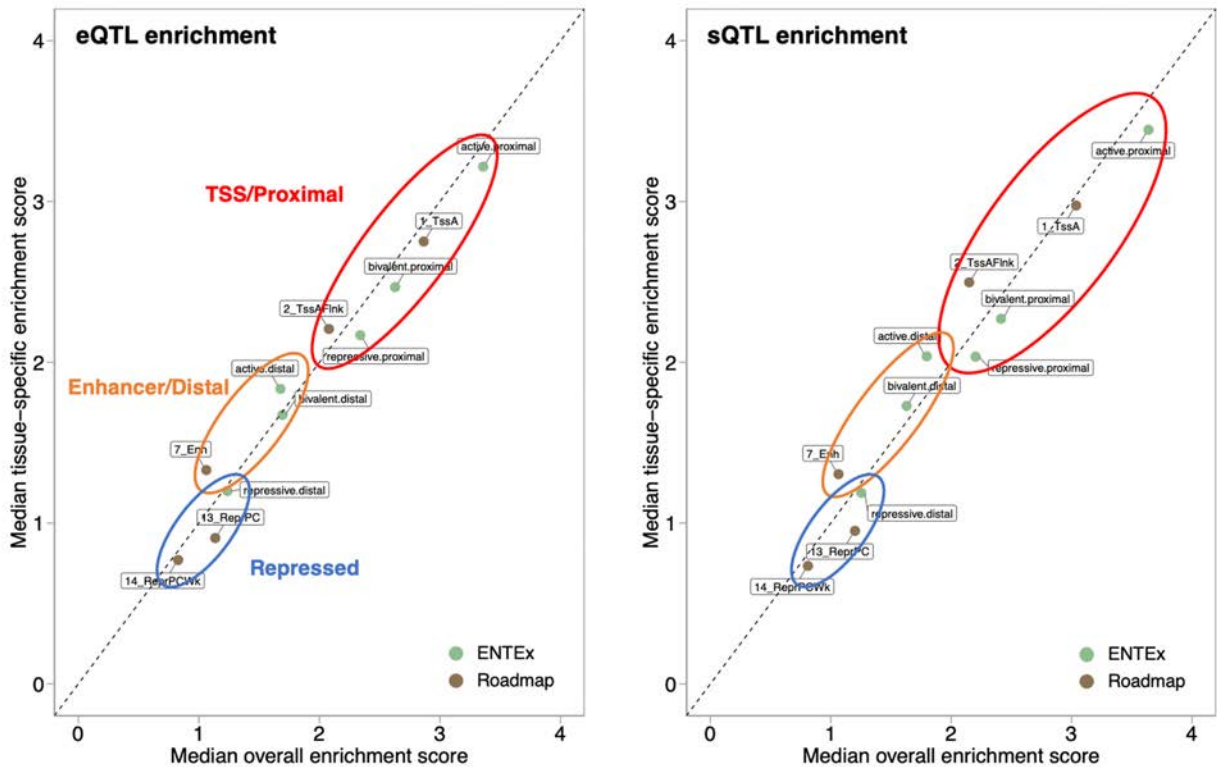

**Data S24. eQTLs in cCREs, related to Figure 4 and STAR Methods “Decoration Enrichments” Section**

(A) eQTL and sQTL enrichment in cCREs. We computed odd ratios (ORs) to estimate the enrichment of the eQTL (upper panel) and sQTL (lower panel) SNPs identified from GTEx tissues in the cCREs from EN-TEEx tissues. The ORs were calculated using the numbers of real QTL SNPs and the control SNPs located in the cCREs compared to those in the baseline regions. This procedure was repeated 30 times to calculate the standard deviation, and the values are indicated by the whiskers. In each panel, we show the QTL enrichment in the

proximal active (left in each panel) and distal active (right in each panel) cCREs from each tissue type. In each figure, the cCREs are further separated into subgroups based on their CTCF binding and AS patterns. Note that the decoration terms are defined in Figure 5A.

**(B)** Roadmap annotations. We selected 14 tissue types that are matched across the EN-TE<sub>x</sub>, GTEx, and Roadmap projects to compare the QTL enrichment in the EN-TE<sub>x</sub> cCREs and Roadmap regulatory annotations. We used the 15-state Roadmap annotations in the analysis.

**(C)** QTL enrichment in cCREs: EN-TE<sub>x</sub> vs. Roadmap. We compared the enrichment of eQTL (left) and sQTL (right) SNPs in the TSS/proximal regions, enhancer/distal regions, and repressed regions. For this calculation, we matched the annotations between EN-TE<sub>x</sub> and Roadmap as shown in panel B.

**A****GWAS Catalog (v1.0.2, hg38)**

197,709 GWAS SNP-PMID entries

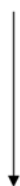

- Retain GWAS SNPs with p-value <math>5 \times 10^{-8}</math>
- Remove non-biallelic SNPs
- Remove GWAS from non-European populations
- Remove SNPs in the HLA locus (chr6:29,723,339-33,087,199 for hg38)

104,802 GWAS SNP-PMID entries

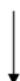

- Incorporate SNPs in tight LD ( $r^2 > 0.6$ ) with the GWAS tag SNPs

160,746 GWAS SNP-PMID entries

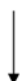

- Remove GWAS with few LD-extend SNPs

**149,747 GWAS SNP-PMID entries**  
(998 GWAS)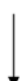**Hypergeometric test**

GWAS enrichment (FDR &lt;math&gt;&lt; 0.001&lt;/math&gt;)

**B**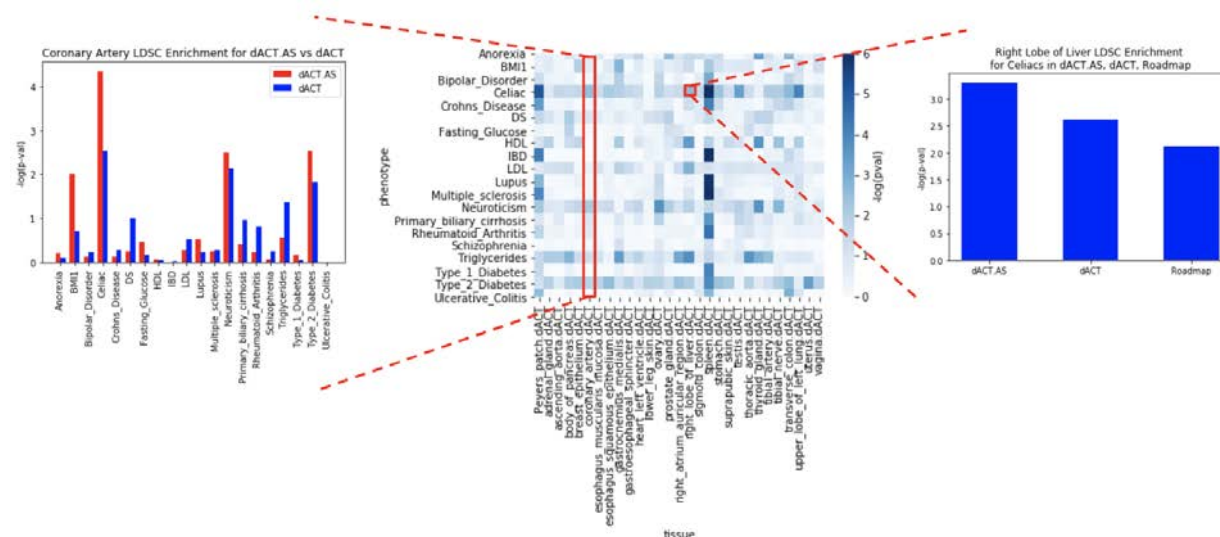

C

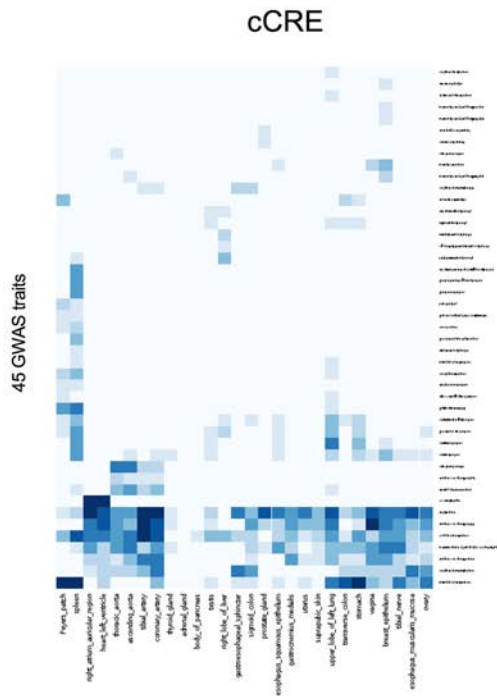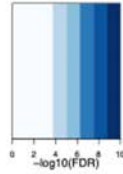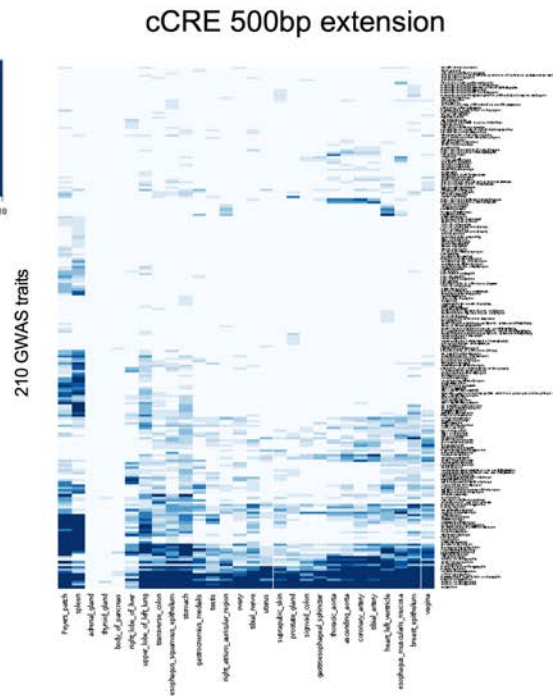

D

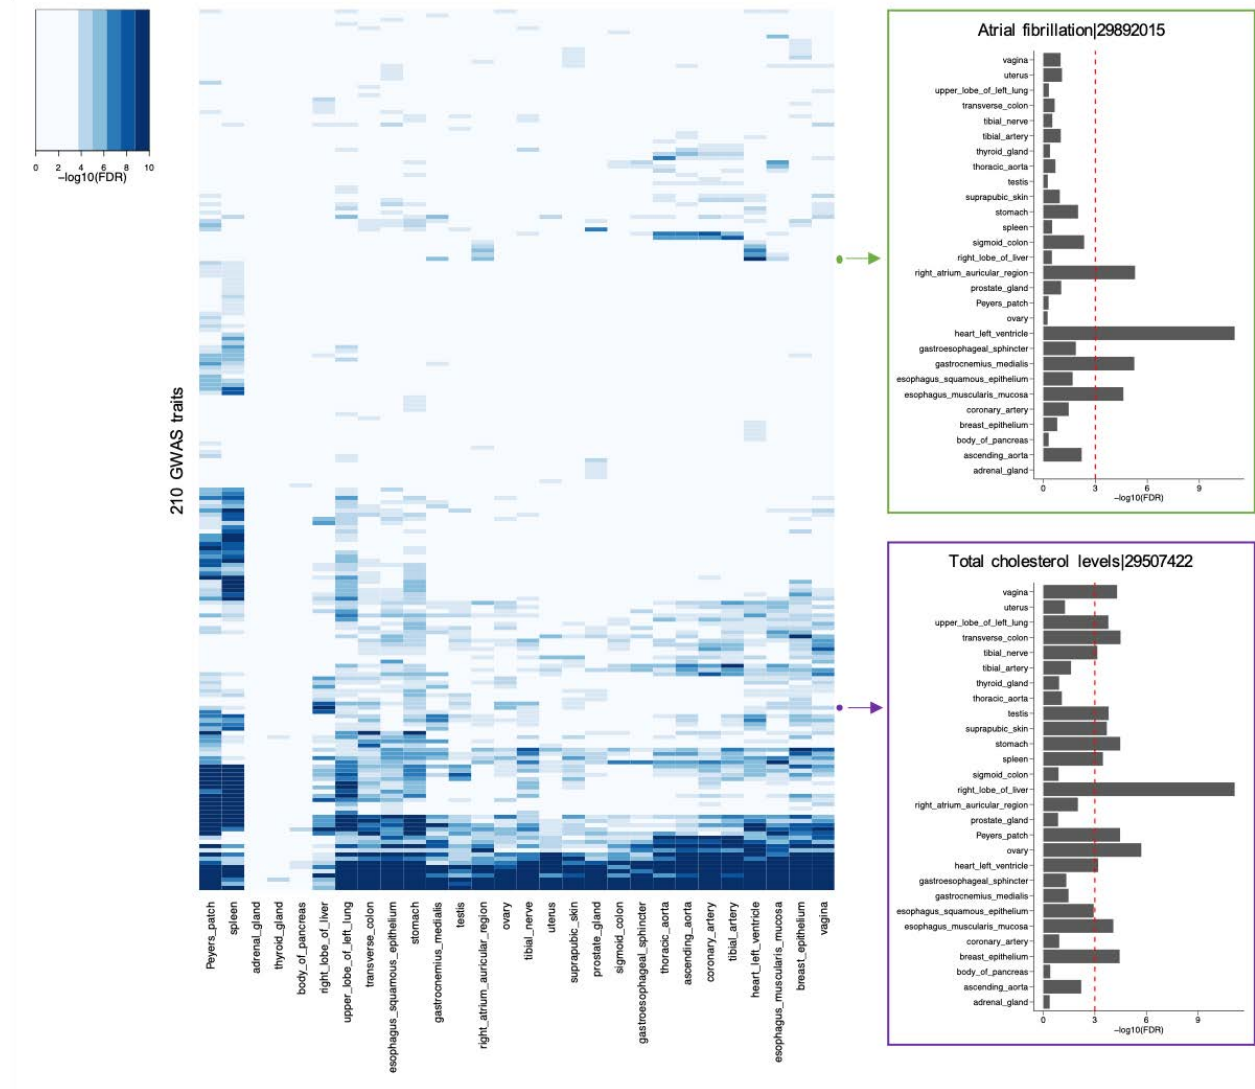

E

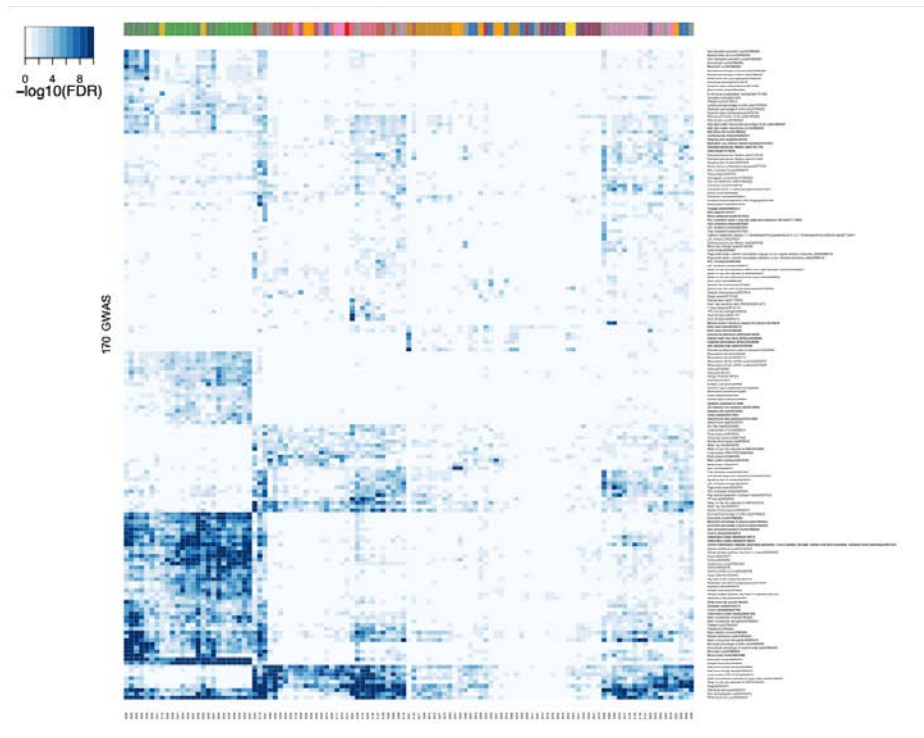

| Cell type/ tissue group | EID epigenome name                         |
|-------------------------|--------------------------------------------|
| iMRO                    | Primary myeloid dendritic cell line        |
|                         | Primary myeloid dendritic cell line        |
|                         | Primary myeloid dendritic cell line        |
|                         | Primary myeloid dendritic cell line        |
| ESC                     | Primary embryonic stem cell line           |
|                         | Primary embryonic stem cell line           |
|                         | Primary embryonic stem cell line           |
|                         | Primary embryonic stem cell line           |
| iPSC                    | Primary induced pluripotent stem cell line |
|                         | Primary induced pluripotent stem cell line |
|                         | Primary induced pluripotent stem cell line |
|                         | Primary induced pluripotent stem cell line |
| ESC-deriv.              | Primary embryonic stem cell derivative     |
|                         | Primary embryonic stem cell derivative     |
|                         | Primary embryonic stem cell derivative     |
|                         | Primary embryonic stem cell derivative     |
| Blood & T cell          | Primary T cell                             |
|                         | Primary T cell                             |
|                         | Primary T cell                             |
|                         | Primary T cell                             |
| HSC & B cell            | Primary hematopoietic stem cell            |
|                         | Primary hematopoietic stem cell            |
|                         | Primary hematopoietic stem cell            |
|                         | Primary hematopoietic stem cell            |
| Mesench.                | Primary mesenchymal stem cell              |
|                         | Primary mesenchymal stem cell              |
|                         | Primary mesenchymal stem cell              |
|                         | Primary mesenchymal stem cell              |
| Myocyt.                 | Primary myocyte                            |
|                         | Primary myocyte                            |
|                         | Primary myocyte                            |
|                         | Primary myocyte                            |
| Epithelial              | Primary epithelial cell                    |
|                         | Primary epithelial cell                    |
|                         | Primary epithelial cell                    |
|                         | Primary epithelial cell                    |
| Neurosp.                | Primary neurospore                         |
|                         | Primary neurospore                         |
|                         | Primary neurospore                         |
|                         | Primary neurospore                         |
| Thymus                  | Primary thymus                             |
|                         | Primary thymus                             |
|                         | Primary thymus                             |
|                         | Primary thymus                             |
| Brain                   | Primary brain cell                         |
|                         | Primary brain cell                         |
|                         | Primary brain cell                         |
|                         | Primary brain cell                         |
| Adipose                 | Primary adipose cell                       |
|                         | Primary adipose cell                       |
|                         | Primary adipose cell                       |
|                         | Primary adipose cell                       |
| Muscle                  | Primary muscle cell                        |
|                         | Primary muscle cell                        |
|                         | Primary muscle cell                        |
|                         | Primary muscle cell                        |
| Heart                   | Primary heart cell                         |
|                         | Primary heart cell                         |
|                         | Primary heart cell                         |
|                         | Primary heart cell                         |
| Smooth muscle           | Primary smooth muscle cell                 |
|                         | Primary smooth muscle cell                 |
|                         | Primary smooth muscle cell                 |
|                         | Primary smooth muscle cell                 |
| Digestive               | Primary digestive cell                     |
|                         | Primary digestive cell                     |
|                         | Primary digestive cell                     |
|                         | Primary digestive cell                     |
| Other                   | Primary other cell                         |
|                         | Primary other cell                         |
|                         | Primary other cell                         |
|                         | Primary other cell                         |

F

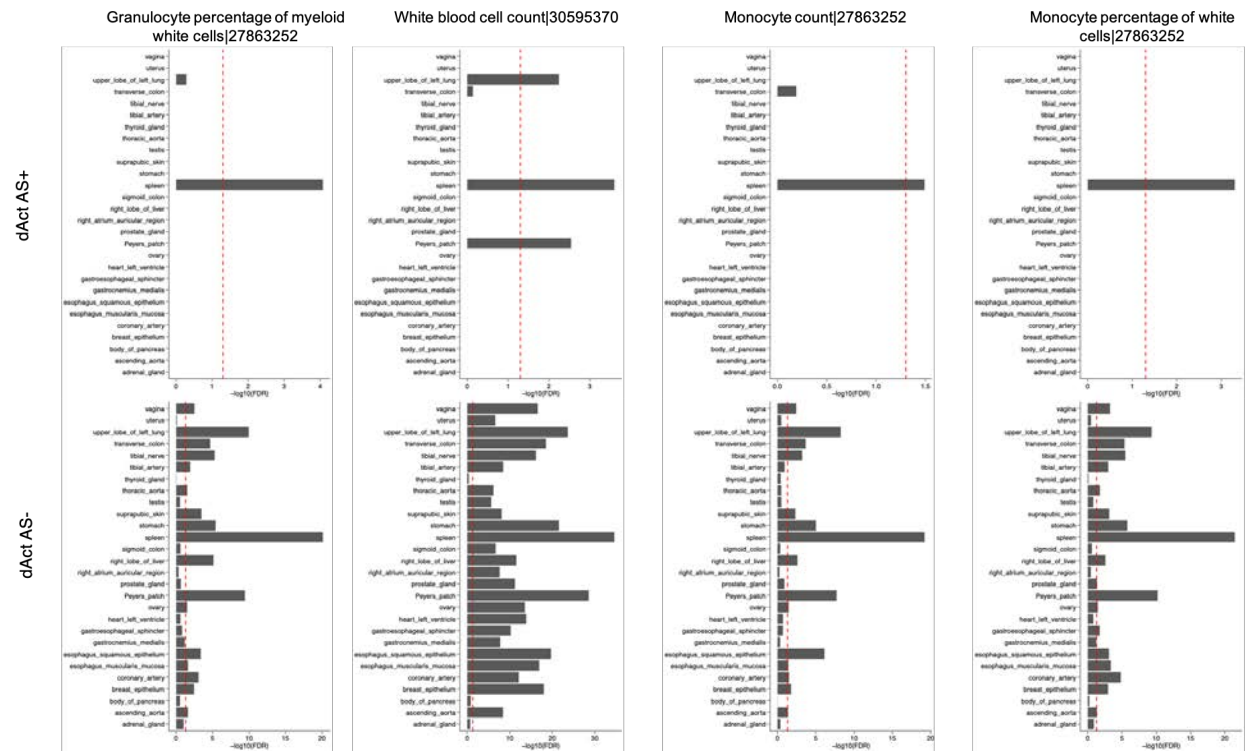



## **Data S25. GWAS enrichment, related to Figure 4 and STAR Methods “Decoration Enrichments” Section**

**(A)** Framework of GWAS enrichment analysis.

**(B)** Stratified linkage disequilibrium score regression (LDSC) enrichment: Comparing EN-TEX AS, non-AS, and Roadmap annotations. This is a shadow figure for Figure 10B in the main text. The central heatmap is the stratified LDSC enrichment of various GWAS traits over distal active elements of all EN-TEX tissues. In the left panel, we compare LDSC enrichment of distal active AS and non-AS over all traits for the coronary artery. In the right panel, we compare LDSC enrichment of distal active AS, non-AS, and Roadmap annotations in the right lobe of liver.

**(C)** GWAS enrichment: cCREs vs. cCREs with 500 bp extensions. We performed GWAS enrichment analysis on the original cCRE regions and the cCRE regions with a 500 bp extension on both sides. More significantly enriched GWAS traits can be identified on the cCRE regions with extensions, suggesting that it is necessary to include the flanking regions in the GWAS enrichment analysis.

**(D)** GWAS enrichment across tissues. We selected two GWAS traits, atrial fibrillation and total cholesterol levels, to show their enrichment scores across all the tissue types.

**(E)** GWAS enrichment for Roadmap annotations. We performed GWAS enrichment analysis on the enhancer annotations from the 127 cell and tissue types from the Roadmap Epigenomics Project. Tissue names are on the horizontal axis and traits are on the vertical axis. Simple clustering of this matrix reveals a blocky structure with sets of traits associated with groups of tissues.

**(F)** GWAS enrichment for AS vs. non-AS cCREs. We compared the GWAS enrichment scores on the distal active cCREs with (upper) and without (lower) AS signatures using the GWAS tag SNPs from blood-associated traits. Note that the decoration terms are defined in Figure S5A.



**A**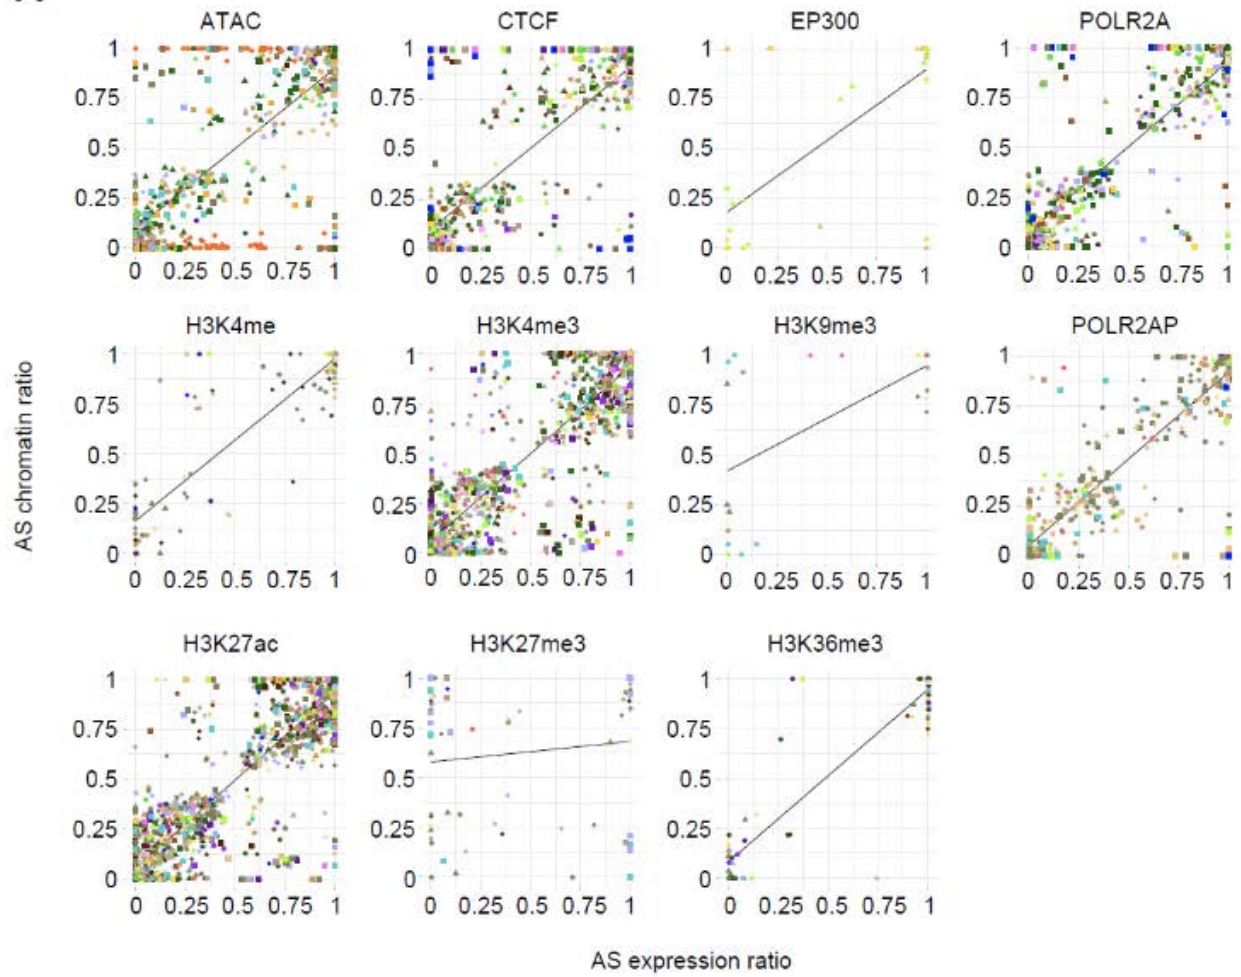**B**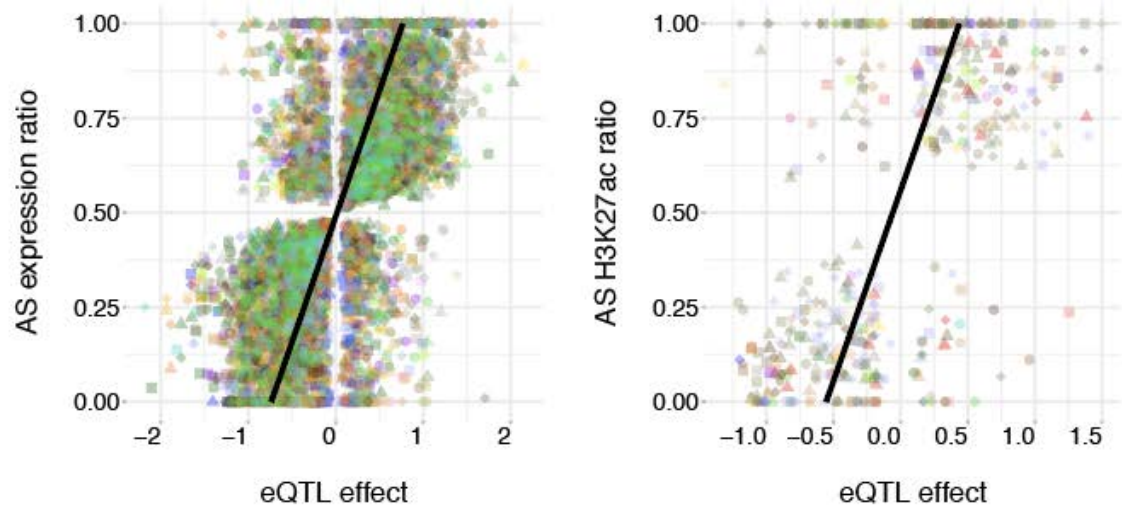

**C**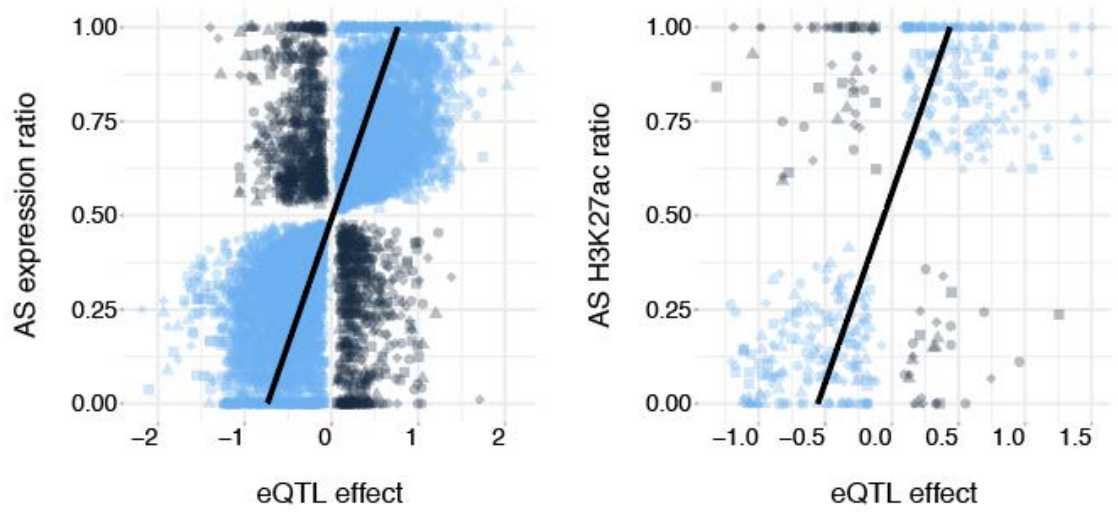**D**

9242 Genes with MS Peptides

*Minimum 3 peptides, scaled expression > 0.2 in tissue, and ASP ratio >25% imbalance*

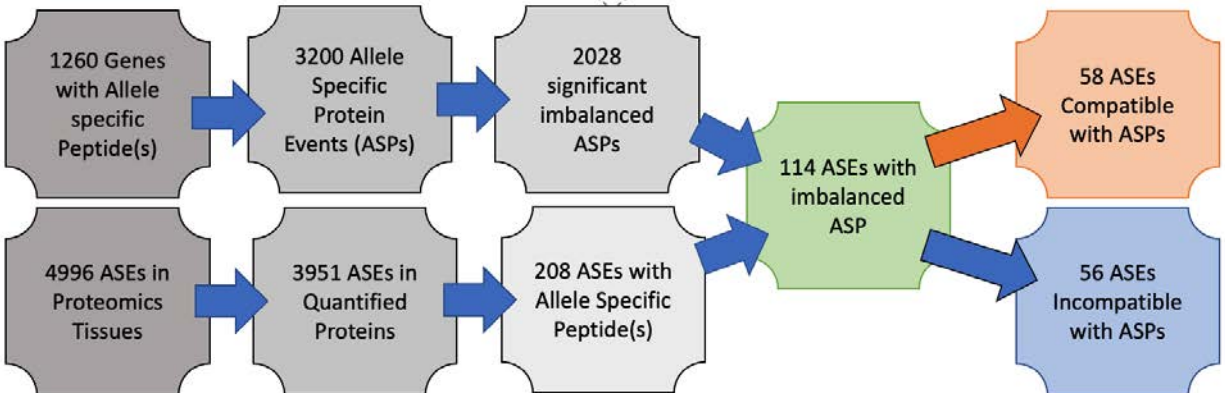

E

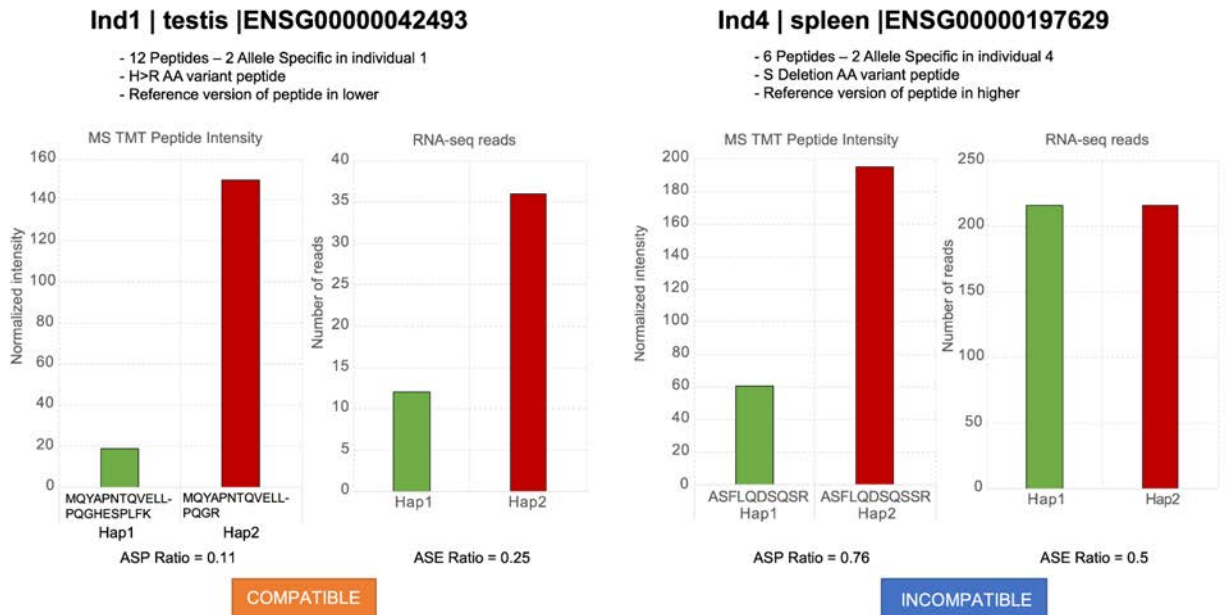

F

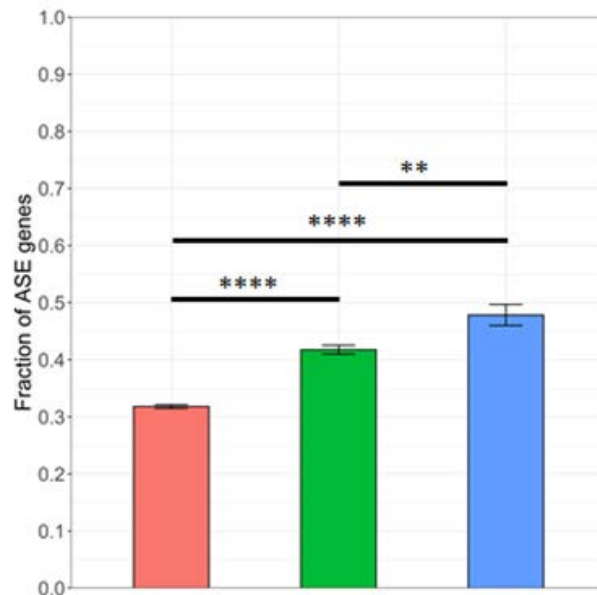

**Data S26. Compatibility between allelic events, related to Figure 4, Figure S5, and STAR Methods “Compatibility” Section**

(A) Compatibility between AS chromatin state of the promoters (+/- 2 kb from the TSS) and the ASE of the corresponding genes. The AS chromatin ratio is the fraction of hap1 ChIP-seq reads among the total number of reads. The ASE ratio is the fraction of hap1 RNA-seq reads among the total number of reads. Each dot is a gene-promoter pair in a given tissue (marked by colors) and individual (marked by shape). See Figure 1A for details regarding the colors and shapes.

**(B)** (Left) ASE ratio of known GTEx eGenes<sup>20</sup> that are AS in the EN-TEEx individuals (fraction of reads of the haplotype with the alternative allele) and eQTL effect size. (Right) AS H3K27ac at hetSNVs that are known GTEx eQTLs. The y-axis shows the fraction of H3K27ac ChIP-seq reads mapped to the alternative allele among the total reads mapped to either allele of an eQTL.

**(C)** Same plots as Figure 4D (left) and Data S26B (right) but re-colored to show whether or not the eQTL effect (beta coefficient) and the ASE (left)/ASB (right) are compatible.

**(D)** Flow chart of filtering and ASE/AS proteomics comparison. Proteomics data were mapped at the gene level and filtered for proteins containing allele-specific peptides (ASPs). ASPs were calculated for each tissue in which allelic peptides were quantified. The ASP ratio was calculated as the summed peptide intensity of the first allele divided by the total specific to either allele. ASPs were filtered by the number of peptides, expression level, and ASP ratio. The p-value was calculated as 0.7 using z-scores.

**(E)** Compatibility between AS mRNA and ASP calculations. (Left) Example of a compatible ASP and ASE ratio. Both the proteomics and transcriptomics results indicate that the second allele is expressed at a higher level. (Right) Example of an incompatible ASP/ASE pairing. The transcriptomics result does not show any bias in the gene expression; however, the second allele is more highly expressed at the protein level.

**(F)** Enrichment of ASE genes near ASM promoters. Enrichment of ASE genes near ASM promoters with (blue) ( $\chi^2$ -test, OR = 1.96) or without (green) ( $\chi^2$ -test, OR = 1.54) AS TF binding, relative to genes near ASM non-cCREs (red). \*\* p < 0.01, \*\*\*\* p < 0.0001.

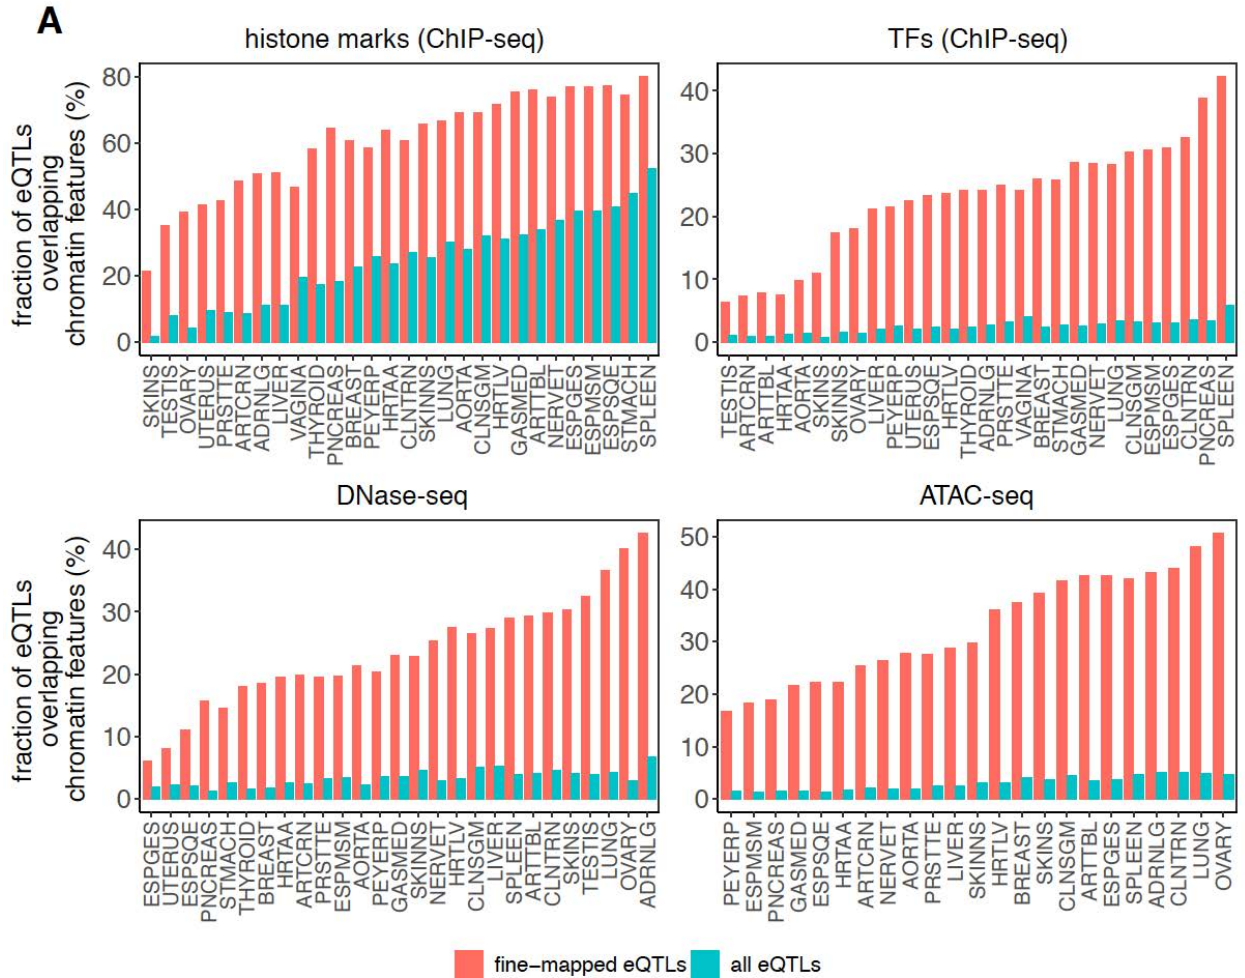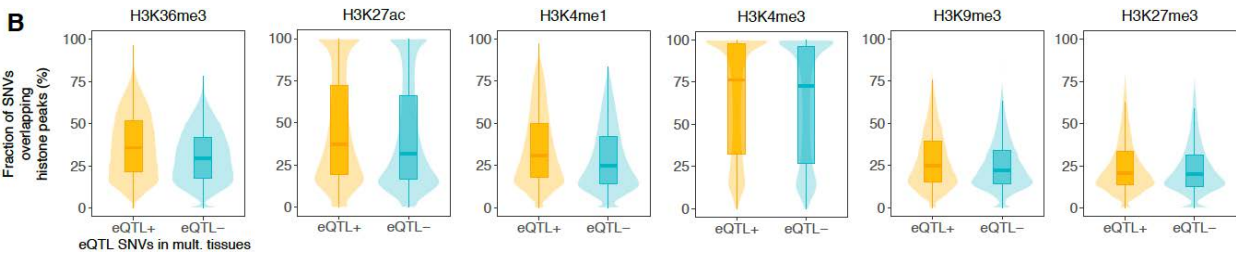

**Data S27. Correlation between chromatin features and eQTL activity, related to Figure S6 and STAR Methods “transferQTL Model” Section**

(A) Chromatin features can help prioritize causal eQTLs. Barplots showing the percentage of eQTLs overlapping a given feature. The fraction of fine-mapped (causal) eQTLs overlapping chromatin features is higher compared with the total set of GTEx eQTLs reported in a given tissue. In the case of histone marks and TFs, we report the proportion of eQTLs/fine-mapped eQTLs overlapping any of the six histone marks (H3K27ac, H3K4me1, H3K4me3, H3K27me3, H3K9me3, H3K36me3) and any of the four TFs (CTCF, EP300, POLR2A, POLR2APhosphoS5) assayed by the EN-TEx project, respectively.

**(B)** Chromatin-marked loci associated with eQTL activity. We identified 1,353,101 SNVs that show tissue-specific eQTL activity. These SNVs are GTEx eQTLs in  $\geq 5$  EN-TE<sub>x</sub> tissues and are not GTEx eQTLs in  $\geq 5$  other EN-TE<sub>x</sub> tissues. Thus, for every SNV we defined two groups of tissues: (1) tissues in which the SNV is an eQTL (eQTL+, orange) and (2) tissues in which the SNV is not an eQTL (eQTL-, cyan). Next, for each histone mark we only considered SNVs that overlap with chromatin peaks in  $\geq 10\%$  of all EN-TE<sub>x</sub> CHIP-seq samples for that particular histone mark. We observed that SNVs are more likely to be marked by a given histone modification in the tissues in which they are eQTLs, compared with the tissues in which they are not eQTLs ( $p$ -value  $< 2.2e-16$  for all histone marks, Wilcoxon paired test). We indicate  $n$  as the number of SNVs in the violin plots of each histone mark (H3K36me<sub>3</sub>:  $n = 232,610$ ; H3K27ac:  $n = 176,260$ ; H3K4me<sub>1</sub>:  $n = 191,689$ ; H3K4me<sub>3</sub>:  $n = 64,650$ ; H3K9me<sub>3</sub>:  $n = 50,236$ ; H3K27me<sub>3</sub>:  $n = 50,973$ ). All box plots depict the first and third quartiles as the lower and upper bounds of the box, with a band inside the box showing the median value and whiskers representing 1.5x the interquartile range.



# A

| Feature # | Feature             | Description                                                                                        | Feature type | Related to    | Additional Info                                                      |
|-----------|---------------------|----------------------------------------------------------------------------------------------------|--------------|---------------|----------------------------------------------------------------------|
| 1         | tissue _specificity | coefficient of variation of eGene's expression profile across EN-TEs samples (indivs. and tissues) | continuous   | donor tissue  | ratio between standard deviation and mean of gene expression profile |
| 2         | slope               | GTEx v8 eQTL-eGene regression slope                                                                | continuous   | donor tissue  | -                                                                    |
| 3         | tss_distance        | GTEx v8 distance from eGene's TSS                                                                  | continuous   | donor tissue  | -                                                                    |
| 4         | ATAC                | presence/absence of ATAC peak overlapping the SNV                                                  | binary       | target tissue | set to 1 if peak present in $\geq 1$ indiv.                          |
| 5         | CTCF                | presence/absence of CTCF peak overlapping the SNV                                                  | binary       | target tissue | set to 1 if peak present in $\geq 1$ indiv.                          |
| 6         | DNase               | presence/absence of DNase peak overlapping the SNV                                                 | binary       | target tissue | set to 1 if peak present in $\geq 1$ indiv.                          |
| 7         | H3K27ac             | presence/absence of H3K27ac peak overlapping the SNV                                               | binary       | target tissue | set to 1 if peak present in $\geq 1$ indiv.                          |
| 8         | H3K27me3            | presence/absence of H3K27me3 peak overlapping the SNV                                              | binary       | target tissue | set to 1 if peak present in $\geq 1$ indiv.                          |
| 9         | H3K36me3            | presence/absence of H3K36me3 peak overlapping the SNV                                              | binary       | target tissue | set to 1 if peak present in $\geq 1$ indiv.                          |
| 10        | H3K4me1             | presence/absence of H3K4me1 peak overlapping the SNV                                               | binary       | target tissue | set to 1 if peak present in $\geq 1$ indiv.                          |
| 11        | H3K4me3             | presence/absence of H3K4me3 peak overlapping the SNV                                               | binary       | target tissue | set to 1 if peak present in $\geq 1$ indiv.                          |
| 12        | H3K9me3             | presence/absence of H3K9me3 peak overlapping the SNV                                               | binary       | target tissue | set to 1 if peak present in $\geq 1$ indiv.                          |
| 13        | POLR2A              | presence/absence of POLR2A peak overlapping the SNV                                                | binary       | target tissue | set to 1 if peak present in $\geq 1$ indiv.                          |
| 14        | POLR2A phospho5     | presence/absence of POLR2Aphospho5 peak overlapping the SNV                                        | binary       | target tissue | set to 1 if peak present in $\geq 1$ indiv.                          |
| 15        | EP300               | presence/absence of EP300 peak overlapping the SNV                                                 | binary       | target tissue | set to 1 if peak present in $\geq 1$ indiv.                          |
| 16        | sum                 | sum off eatures 4-15                                                                               | discrete     | target tissue | -                                                                    |
| 17        | ATAC _k             | fold-change ATAC signal ( $\pm 5$ bp window around the SNV)                                        | continuous   | target tissue | mean value across indivs.                                            |
| 18        | CTCF _k             | fold-change CTCF signal ( $\pm 5$ bp window around the SNV)                                        | continuous   | target tissue | mean value across indivs.                                            |
| 19        | DNase _k            | fold-change DNase signal ( $\pm 5$ bp window around the SNV)                                       | continuous   | target tissue | mean value across indivs.                                            |
| 20        | H3K27ac _k          | fold-change H3K27ac signal ( $\pm 5$ bp window around the SNV)                                     | continuous   | target tissue | mean value across indivs.                                            |
| 21        | H3K27me3 _k         | fold-change H3K27me3 signal ( $\pm 5$ bp window around the SNV)                                    | continuous   | target tissue | mean value across indivs.                                            |
| 22        | H3K4me1 _k          | fold-change H3K4me1 signal ( $\pm 5$ bp window around the SNV)                                     | continuous   | target tissue | mean value across indivs.                                            |



| Feature # | Feature             | Description                                                    | Feature type | Related to        | Additional Info                                  |
|-----------|---------------------|----------------------------------------------------------------|--------------|-------------------|--------------------------------------------------|
| 23        | H3K9me3 _k          | fold-change H3K9me3 signal ( $\pm$ 5 bp window around the SNV) | continuous   | target tissue     | mean value across indivs.                        |
| 24        | POLR2A _k           | fold-change POLR2A signal ( $\pm$ 5 bp window around the SNV)  | continuous   | target tissue     | mean value across indivs.                        |
| 25        | ATAC _p             | fraction of tissues with ATAC peak over SNV                    | continuous   | 28 EN-TEx tissues | -                                                |
| 26        | CTCF _p             | fraction of tissues with CTCF peak over SNV                    | continuous   | 28 EN-TEx tissues | -                                                |
| 27        | DNase _p            | fraction of tissues with DNase peak over SNV                   | continuous   | 28 EN-TEx tissues | -                                                |
| 28        | H3K27ac _p          | fraction of tissues with H3K27ac peak over SNV                 | continuous   | 28 EN-TEx tissues | -                                                |
| 29        | H3K27me3 _p         | fraction of tissues with H3K27me3 peak over SNV                | continuous   | 28 EN-TEx tissues | -                                                |
| 30        | H3K36me3 _p         | fraction of tissues with H3K36me3 peak over SNV                | continuous   | 28 EN-TEx tissues | -                                                |
| 31        | H3K4me1 _p          | fraction of tissues with H3K4me1 peak over SNV                 | continuous   | 28 EN-TEx tissues | -                                                |
| 32        | H3K4me3 _p          | fraction of tissues with H3K4me3 peak over SNV                 | continuous   | 28 EN-TEx tissues | -                                                |
| 33        | H3K9me3 _p          | fraction of tissues with H3K9me3 peak over SNV                 | continuous   | 28 EN-TEx tissues | -                                                |
| 34        | POLR2A _p           | fraction of tissues with POLR2A peak over SNV                  | continuous   | 28 EN-TEx tissues | -                                                |
| 35        | POLR2A phosphoS5 _p | fraction of tissues with POLR2AphosphoS5 peak over SNV         | continuous   | 28 EN-TEx tissues | -                                                |
| 36        | EP300 _p            | fraction of tissues with EP300 peak over SNV                   | continuous   | 28 EN-TEx tissues | -                                                |
| 37        | is_proximal         | whether the SNV overlaps any annotated TSS ( $\pm$ 2 kb)       | binary       | -                 | set to 1 if SNV overlaps TSS wrt gencode v 24    |
| 38        | is_cCRE             | whether the SNV overlaps any cCRE                              | binary       | -                 | set to 1 if SNV overlaps cCRE wrt ENCODE3        |
| 39        | is_out_repeat       | whether the SNV overlaps any repeated region                   | binary       | -                 | set to 1 if SNV does not overlap repeated region |

**B**

| Metric              | Description                                                                       |
|---------------------|-----------------------------------------------------------------------------------|
| Sensitivity         | $\frac{TP}{TP + FN}$                                                              |
| Specificity         | $\frac{TN}{FP + TN}$                                                              |
| Precision           | $\frac{TP}{TP + FP}$                                                              |
| Balanced Accuracy   | $\frac{\text{sensitivity} + \text{specificity}}{2}$                               |
| MCC                 | $\frac{TP \times TN - FP \times FN}{\sqrt{(TP + FP)(TP + FN)(TN + FP)(TN + FN)}}$ |
| Accuracy            | $\frac{TP + TN}{TP + TN + FP + FN}$                                               |
| No-information Rate | the largest proportion of the observed classes                                    |
| Accuracy Ratio      | $\frac{\text{Accuracy}}{\text{No-information Rate}}$                              |
| Prevalence          | $\frac{TP + FN}{TP + TN + FP + FN}$                                               |

**C**

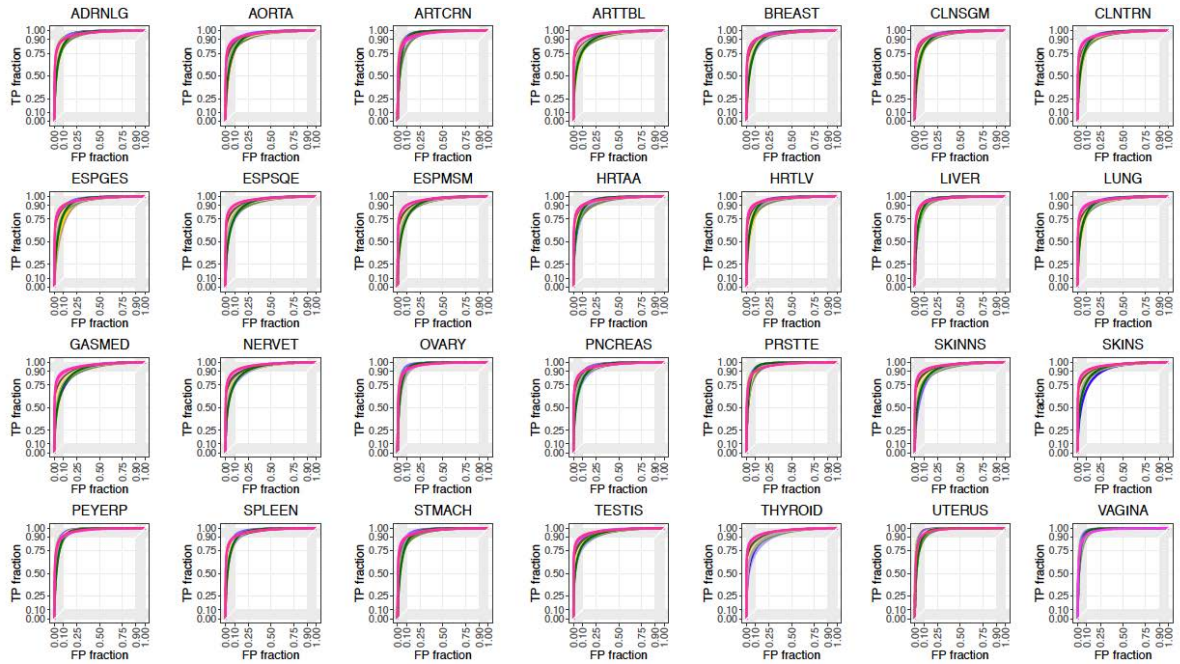

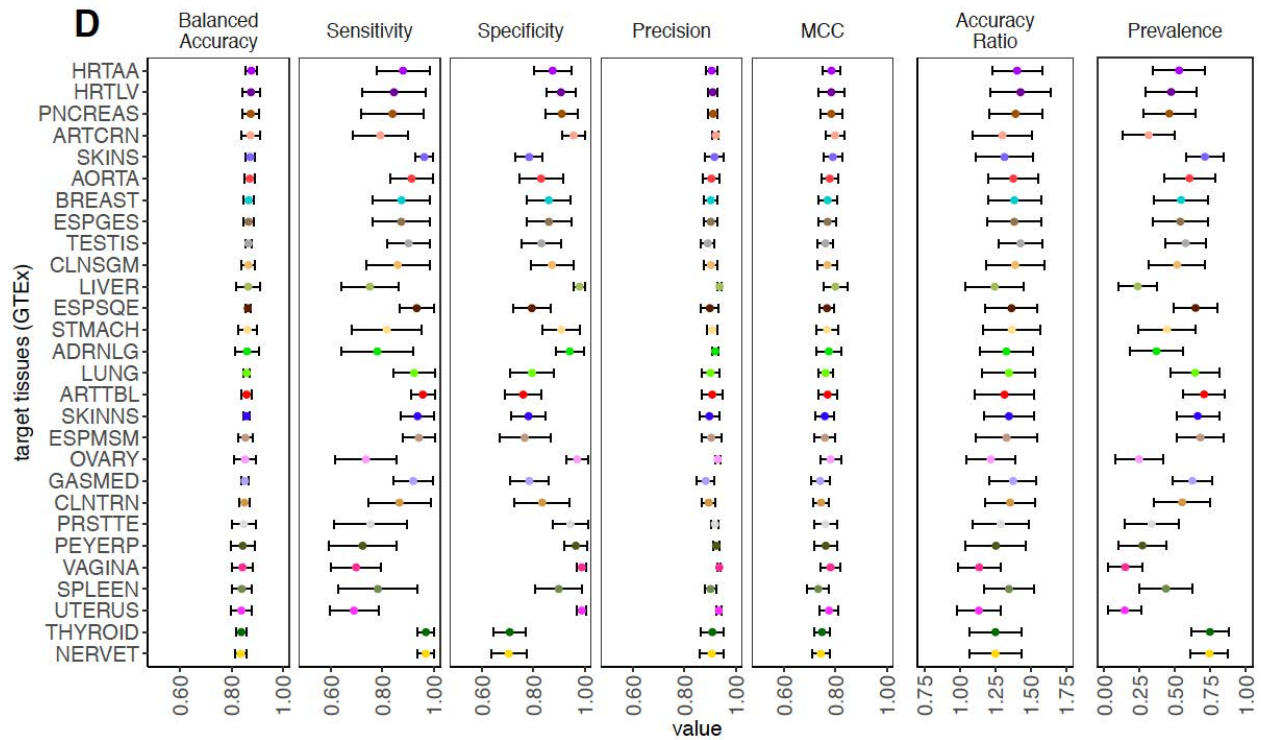

**E**

|    | Donor Tissue                          | Label   | N. of samples | N. of GTEx eQTLs | N. of likely eQTLs |
|----|---------------------------------------|---------|---------------|------------------|--------------------|
| 1  | Adrenal Gland                         | ADRNLG  | 233           | 422,213          | 81,933             |
| 2  | Artery Aorta                          | AORTA   | 387           | 724,353          | 202,090            |
| 3  | Artery Coronary                       | ARTCRN  | 213           | 336,341          | 65,570             |
| 4  | Artery Tibial                         | ARTTBL  | 584           | 911,849          | 261,926            |
| 5  | Breast - Mammary Tissue               | BREAST  | 396           | 586,535          | 174,403            |
| 6  | Colon - Sigmoid                       | CLNSGM  | 318           | 573,063          | 160,106            |
| 7  | Colon - Transverse                    | CLNTRN  | 368           | 607,436          | 190,233            |
| 8  | Esophagus - Gastroesophageal Junction | ESPGES  | 330           | 579,297          | 173,447            |
| 9  | Esophagus - Mucosa                    | ESPSQE  | 497           | 843,932          | 239,419            |
| 10 | Esophagus - Muscularis                | ESPMSM  | 465           | 829,886          | 252,055            |
| 11 | Heart - Atrial Appendage              | HRTAA   | 372           | 641,282          | 162,689            |
| 12 | Heart - Left Ventricle                | HRTLTV  | 386           | 577,859          | 131,671            |
| 13 | Liver                                 | LIVER   | 208           | 293,783          | 37,803             |
| 14 | Lung                                  | LUNG    | 515           | 776,962          | 231,600            |
| 15 | Muscle - Skeletal                     | GASMED  | 706           | 869,283          | 259,837            |
| 16 | Nerve - Tibial                        | NERVET  | 532           | 1,007,246        | 296,071            |
| 17 | Ovary                                 | OVARY   | 167           | 272,146          | 43,010             |
| 18 | Pancreas                              | PNCREAS | 305           | 552,290          | 122,906            |
| 19 | Prostate                              | PRSTTE  | 221           | 361,651          | 73,230             |
| 20 | Skin - Not Sun Exposed (Suprapubic)   | SKINNS  | 517           | 861,598          | 259,642            |
| 21 | Skin - Sun Exposed (Lower leg)        | SKINS   | 605           | 967,288          | 239,637            |
| 22 | Small Intestine - Terminal Ileum      | PEYERP  | 174           | 290,755          | 51,824             |
| 23 | Spleen                                | SPLEEN  | 227           | 520,408          | 122,690            |
| 24 | Stomach                               | STMACH  | 324           | 483,265          | 121,167            |
| 25 | Testis                                | TESTIS  | 322           | 932,078          | 208,046            |
| 26 | Thyroid                               | THYROID | 574           | 998,513          | 287,261            |
| 27 | Uterus                                | UTERUS  | 129           | 163,537          | 21,789             |
| 28 | Vagina                                | VAGINA  | 141           | 171,342          | 21,898             |



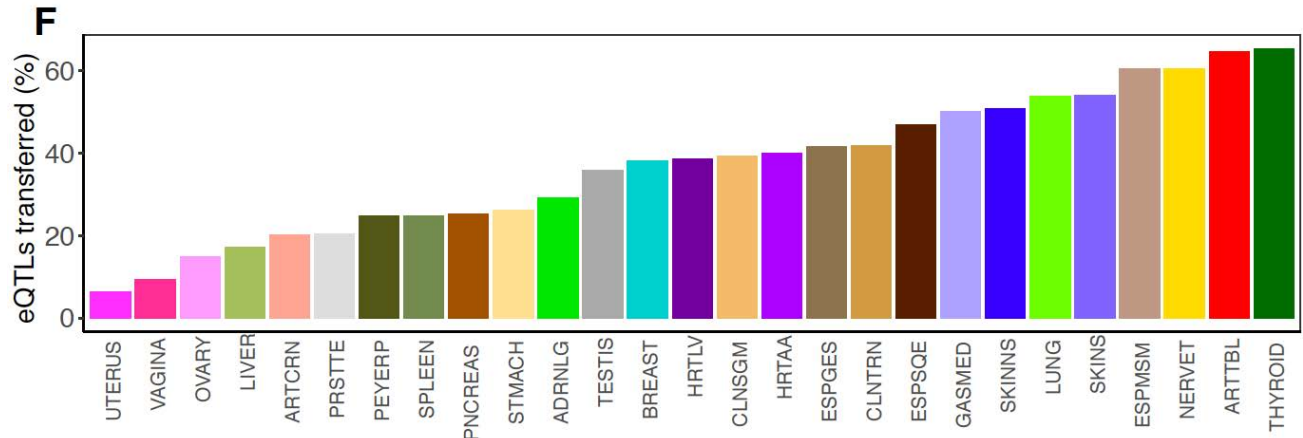

**G**

| Target Tissue | Total                 | Predicted         | Novel             |
|---------------|-----------------------|-------------------|-------------------|
| THYROID       | 1,467,572 (1,290,756) | 958,740 (841,058) | 816,420 (698,738) |
| ARTTBL        | 1,467,916 (1,286,326) | 947,245 (828,900) | 837,659 (719,314) |
| NERVET        | 1,467,940 (1,289,188) | 887,180 (777,348) | 758,986 (649,154) |
| ESPMMSM       | 1,468,001 (1,289,266) | 886,159 (776,500) | 799,913 (690,254) |
| SKINS         | 1,468,004 (1,288,495) | 793,089 (695,178) | 683,870 (585,959) |
| LUNG          | 1,467,841 (1,289,600) | 789,415 (692,658) | 720,074 (623,317) |
| SKINNS        | 1,467,830 (1,288,516) | 744,235 (652,032) | 656,856 (564,653) |
| GASMED        | 1,467,849 (1,284,844) | 734,548 (641,891) | 646,988 (554,331) |
| ESPSQE        | 1,467,929 (1,285,876) | 688,868 (603,916) | 615,039 (530,087) |
| CLNTRN        | 1,467,703 (1,288,973) | 612,148 (536,318) | 575,364 (499,534) |
| ESPGES        | 1,467,849 (1,289,115) | 609,024 (534,229) | 575,021 (500,226) |
| HRTAA         | 1,467,844 (1,287,852) | 586,424 (515,551) | 549,573 (478,700) |
| CLNSGM        | 1,467,970 (1,289,237) | 574,549 (504,154) | 544,411 (474,016) |
| HRTLTV        | 1,467,925 (1,286,240) | 565,778 (496,803) | 533,022 (464,047) |
| BREAST        | 1,467,981 (1,288,553) | 560,010 (490,672) | 526,559 (457,221) |
| TESTIS        | 1,467,715 (1,293,072) | 526,338 (461,012) | 460,638 (395,312) |
| ADRNLG        | 1,467,819 (1,289,468) | 427,103 (377,276) | 413,087 (363,260) |
| STMACH        | 1,467,763 (1,289,089) | 382,833 (335,265) | 366,193 (318,625) |
| PNCREAS       | 1,467,795 (1,287,656) | 369,129 (323,967) | 349,283 (304,121) |
| PEYERP        | 1,467,623 (1,290,110) | 364,123 (322,879) | 357,375 (316,131) |
| SPLEEN        | 1,467,822 (1,290,788) | 364,926 (319,817) | 347,251 (302,142) |
| PRSTTE        | 1,467,921 (1,289,186) | 299,553 (263,773) | 290,817 (255,037) |
| ARTCRN        | 1,467,752 (1,287,251) | 297,262 (260,061) | 291,965 (254,764) |
| LIVER         | 1,467,913 (1,285,031) | 251,342 (220,727) | 245,376 (214,761) |
| OVARY         | 1,467,879 (1,289,709) | 219,686 (193,123) | 215,232 (188,669) |
| VAGINA        | 1,467,893 (1,290,434) | 136,579 (117,983) | 134,710 (116,114) |
| UTERUS        | 1,467,947 (1,288,382) | 94,299 (83,539)   | 93,199 (82,439)   |

**Data S28. Building a predictive model that transfers eQTLs from a donor tissue to a target tissue: features, performance, and validation, related to Figure 5, Figure S6, and STAR Methods “transferQTL Model” Section**

**(A)** List of predictive features employed by the random forest model to predict eQTL activity in a target tissue. Features employed to predict which donor-tissue eQTLs can be transferred to a target tissue. For features 25-36, the fraction is computed over those of the 28 tissues with available data for the relevant experiment (e.g., if no ATAC-seq experiments were performed for lung tissue, then lung is not included in the calculation of ATAC<sub>p</sub>).

**(B)** Description of the metrics used to evaluate the random forest model. These metrics have been used in the submodel evaluations shown in Figure 5B and Data S28D.

**(C)** Performance of the random forest submodels by donor tissue. Each plot shows receiver operating characteristic (ROC) curves from multiple target-tissue submodels obtained using the

same donor tissue. For instance, the first plot shows ROC curves obtained from all submodels using adrenal gland (ADRNLG) as the donor tissue. ROC curves for each target tissue were computed on a five-fold cross-validation schema and are color-coded in the figure (see Data S28E for a correspondence between tissues and colors).

**(D)** Performance of the random forest submodels by target tissue. Dotplot reporting, for each target tissue (y-axis), performance metrics (x-axis) of the models obtained by using different donor tissues. For a particular target tissue, we report mean and standard deviation of the metric computed using different donor tissues. See Data S28B for a detailed description of each performance metric.

**(E)** Number of eQTLs per donor tissue. For each of the 28 deeply sampled EN-TE<sub>x</sub> tissues, we list (1) the corresponding number of samples with the individual's genotype used by GTEx to perform eQTL analyses (column "N. of samples") (2) the number of eQTLs used by the model when setting the relevant tissue as a "donor tissue" (column "N. of GTEx eQTLs"). More specifically, this number corresponds to the set of eQTLs associated with one single eGene in the donor tissue. We also require this single eGene to have non-missing (e.g., "not NA") coefficient of variation for gene expression across EN-TE<sub>x</sub> individuals and tissues. In the fifth column we list the number of novel "likely" eQTLs for each tissue. These are the union of all "likely" eQTLs across all submodels' test sets for a given tissue. These are eQTLs not present in the original GTEx catalog for a given tissue, but that were predicted by our model to be active in that tissue. These lists are available on the EN-TE<sub>x</sub> portal ([perTissue.likely.eQTLs.tsv](#)).

**(F)** Proportion (%) of blood eQTLs from Vosa et al.<sup>21</sup> that can be transferred to each EN-TE<sub>x</sub> tissue. In this analysis, we aimed to predict the activity of 1,547,430 blood eQTLs from Vosa et al. in every EN-TE<sub>x</sub> tissue. To do so, we applied, for every target tissue, the submodel previously trained on GTEx data that uses artery aorta as the donor tissue (since blood is not among the EN-TE<sub>x</sub> tissues, we do not currently have a model using blood as the donor tissue). For each EN-TE<sub>x</sub> tissue (x-axis) other than artery aorta, we report the proportion of blood eQTLs (y-axis) predicted to be active by the model specific to each target tissue. Because of some overlap between this catalog of blood eQTLs and the GTEx catalogs, we computed these results after excluding the blood eQTLs that were also contained in the original training set used for every target tissue (see also Data S28G).

**(G)** Number of potentially novel eQTLs predicted for each EN-TE<sub>x</sub> tissue that are not present in the GTEx catalog. This table reports, for every target tissue, (1) the total number of blood eQTLs (from Vosa et al.<sup>21</sup>) analyzed after removing those contained in the training set (column "total"), (2) the number of blood eQTLs transferred, i.e., predicted to be active (column "predicted"), and (3) within the predicted eQTLs, the number of novel eQTLs that are not contained in the GTEx eQTL catalog for the relevant tissue. We identified 496,477 novel eQTLs on average across tissues. Because not all blood eQTLs from Vosa et al.<sup>21</sup> might also have been tested by GTEx for gene associations in the relevant tissue, we also report (in parentheses) the numbers of total, predicted, and novel eQTLs out of those SNVs also tested by GTEx in a particular tissue.

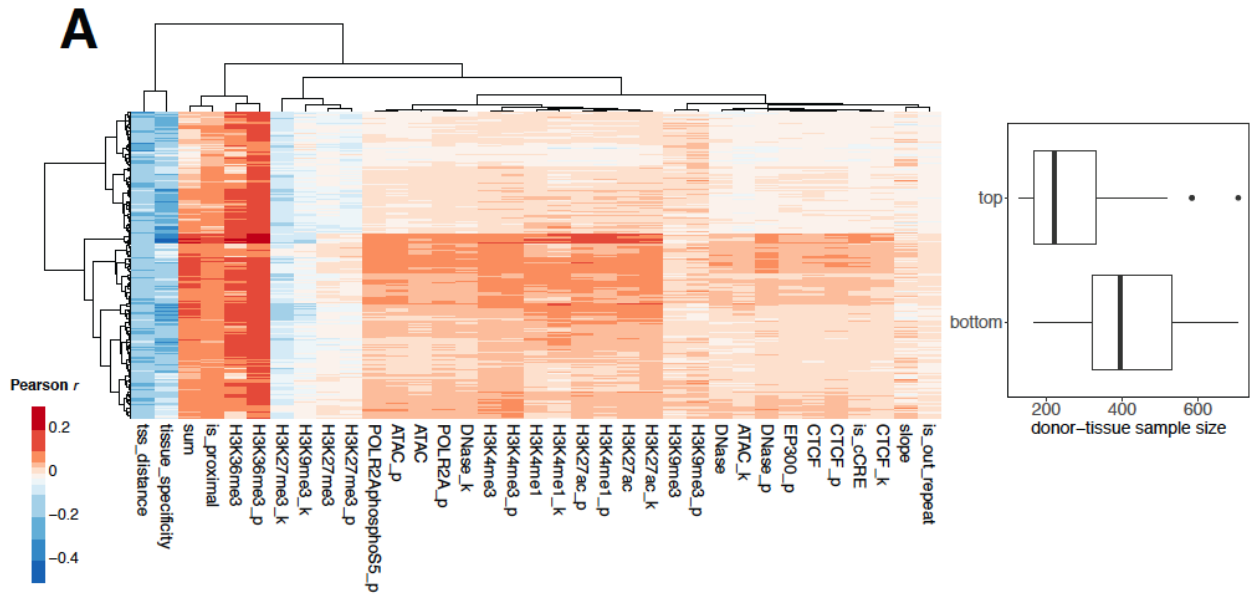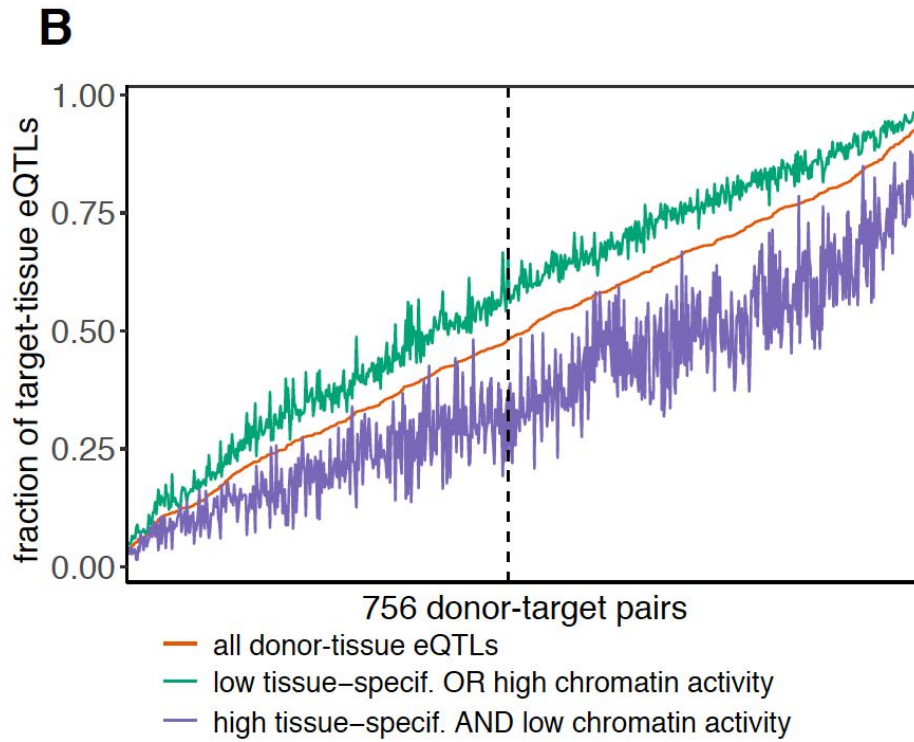



**C** activity of predicted eQTLs across 49 GTEx tissues

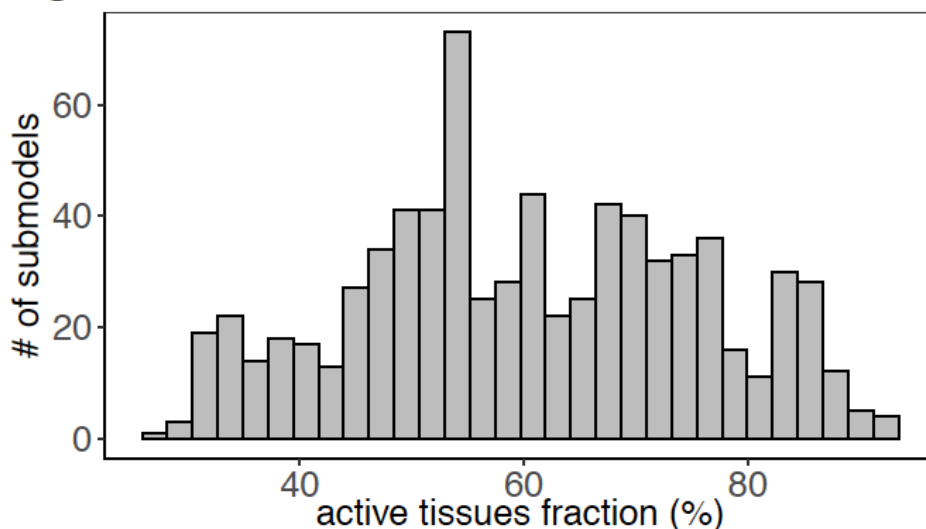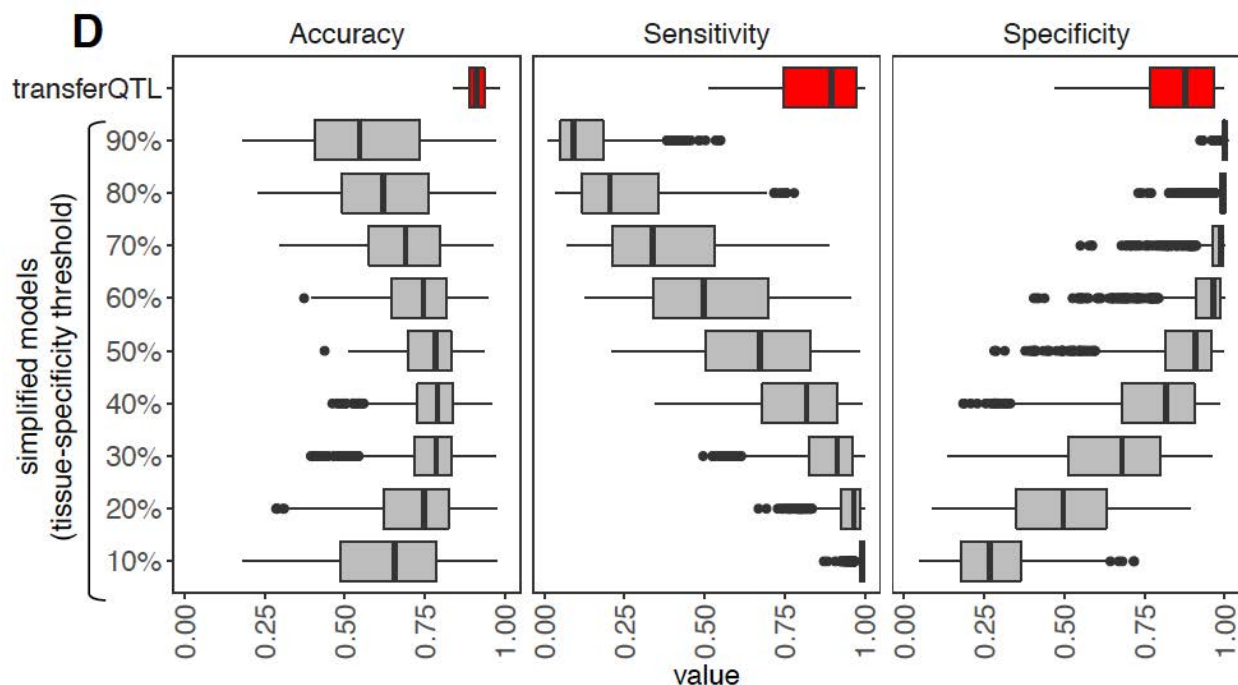

**Data S29. Model interpretation and evaluating the impact of tissue specificity on predicted eQTLs, related to Figure 5, Figure S6, and STAR Methods “transferQTL Model” Section**

**(A)** Dissecting the contribution of features to predicting tissue-specific eQTL activity. (Left) Heatmap showing, for each submodel (rows), Pearson’s correlation coefficients between the level of predictive features (columns) at donor-tissue eQTLs and the probability of donor-tissue eQTLs being classified as eQTLs in the target tissue (clustering method: “Ward.D2”, clustering distance: “manhattan”). (Right) Boxplot showing the sample size of the donor tissues used for the submodels in the top and bottom (row) clusters of the heatmap. The sample size of each tissue is reported in Data S28E (column “N. of samples”).

**(B)** By analyzing the chromatin activity of donor-tissue eQTLs in the target tissue and the tissue specificity of their eGenes, we can identify eQTLs active in the target tissue. Donor-tissue eQTLs either associated with housekeeping eGenes, or those that have high chromatin activity in the target tissue (green line), are more frequently also eQTLs in the target tissue, compared with donor-tissue eQTLs associated with tissue-specific eGenes and that have low chromatin activity in the target tissue (purple line). These enrichments are compared with the proportion of target-tissue eQTLs out of all donor-tissue eQTLs used across the 756 donor-target tissue pairs (orange line). Green line: donor-tissue eQTLs with “tissue specificity”  $< 0.8$  or “sum” (chromatin marking)  $\geq 3$ . Purple line: “tissue specificity”  $> 5$  and “sum” = 0. See also Data S28A for the definition of “sum” and “tissue specificity” features. The dashed vertical line corresponds to the results shown in Figure 5G, i.e., the case using testis as the donor tissue and thyroid as the target tissue.

**(C)** Activity of predicted eQTLs across 49 GTEx tissues. We computed the tissue specificity of eQTLs predicted by each submodel. The tissue specificity corresponds to the percentage of tissues (out of 49 GTEx tissues) in which an eQTL is found to be active based on the GTEx catalog. We report the distribution of median tissue specificity across all 756 submodels.

**(D)** Evaluating the impact of tissue specificity on predicted eQTLs. We built a simplified model that transfers eQTLs to a given tissue based on their degree of tissue specificity. We evaluated the performance of this simplified model by using different thresholds of tissue specificity. For instance, 10% corresponds to a model that transfers to a given tissue eQTLs that are active in at least 10% of the GTEx tissues; 90% corresponds to a model that transfers to a given tissue eQTLs that are active in at least 90% of the GTEx tissues. The performance (accuracy, sensitivity, and specificity) is compared to our random-forest model trained on multi-omics EN-TEEx data (transferQTL). See also Figure S6D for a comparison based on balanced accuracy.

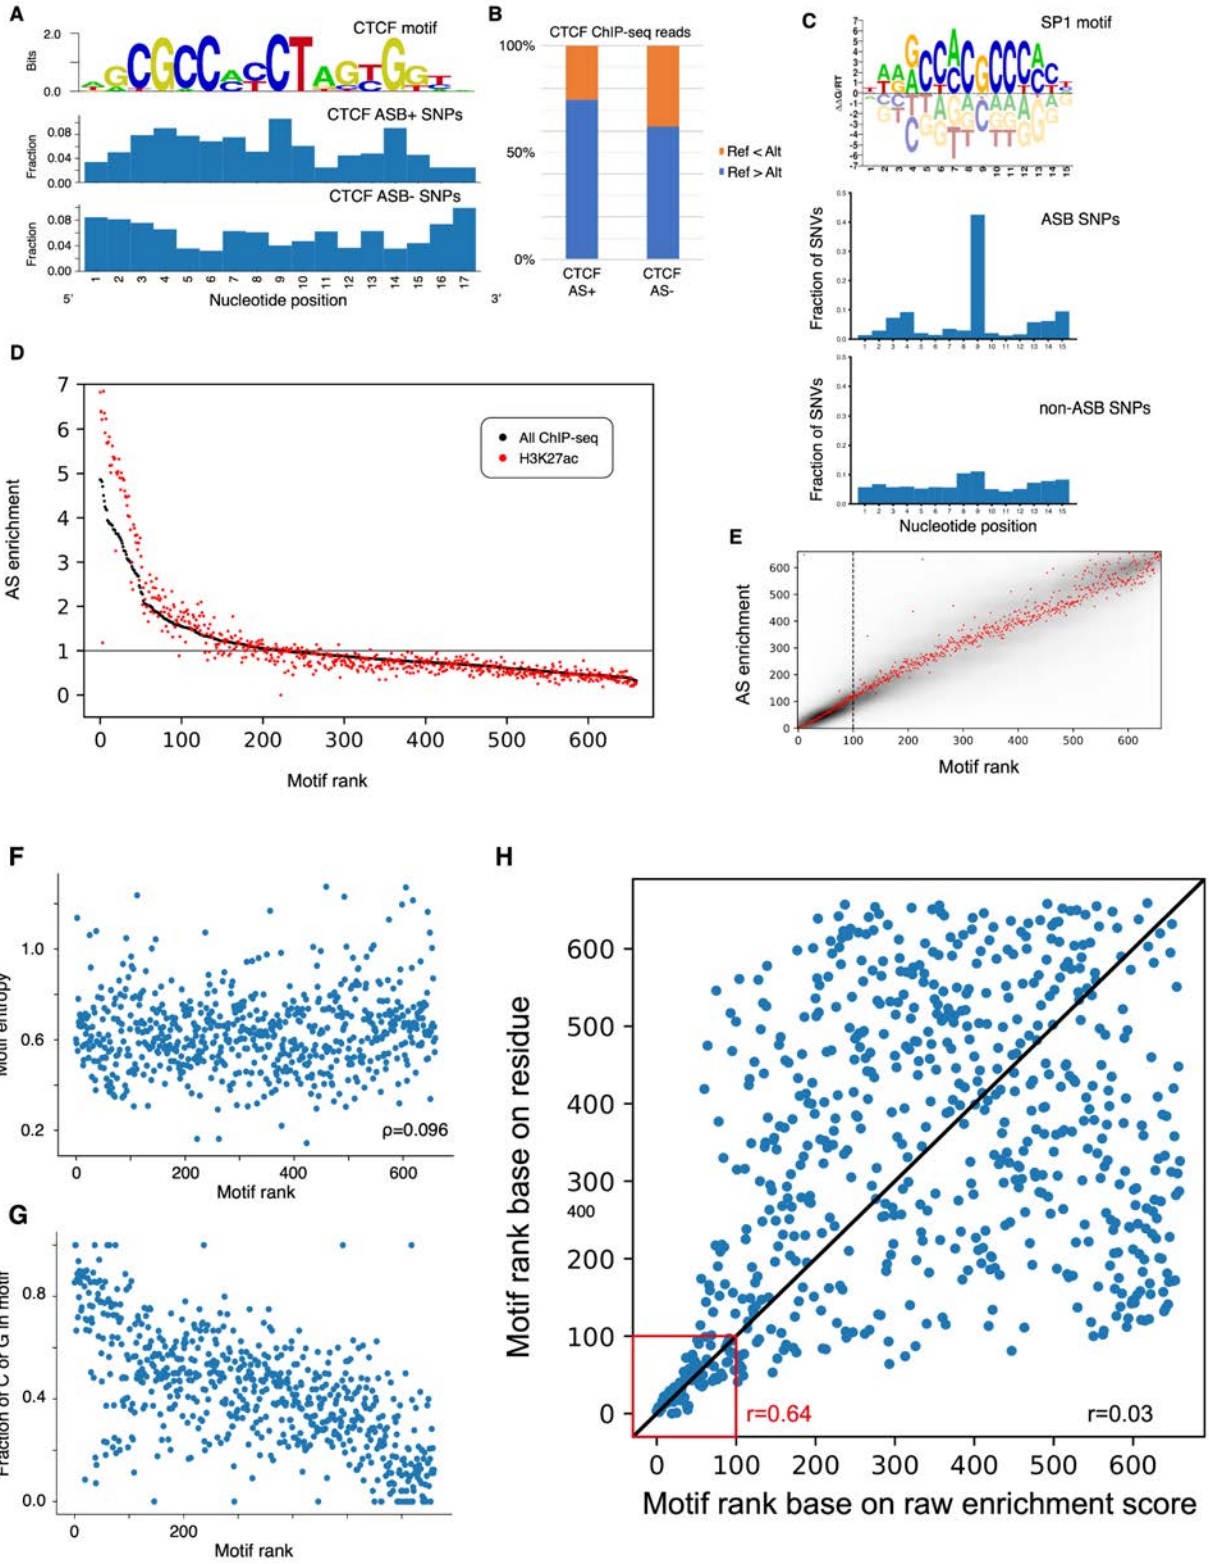

I

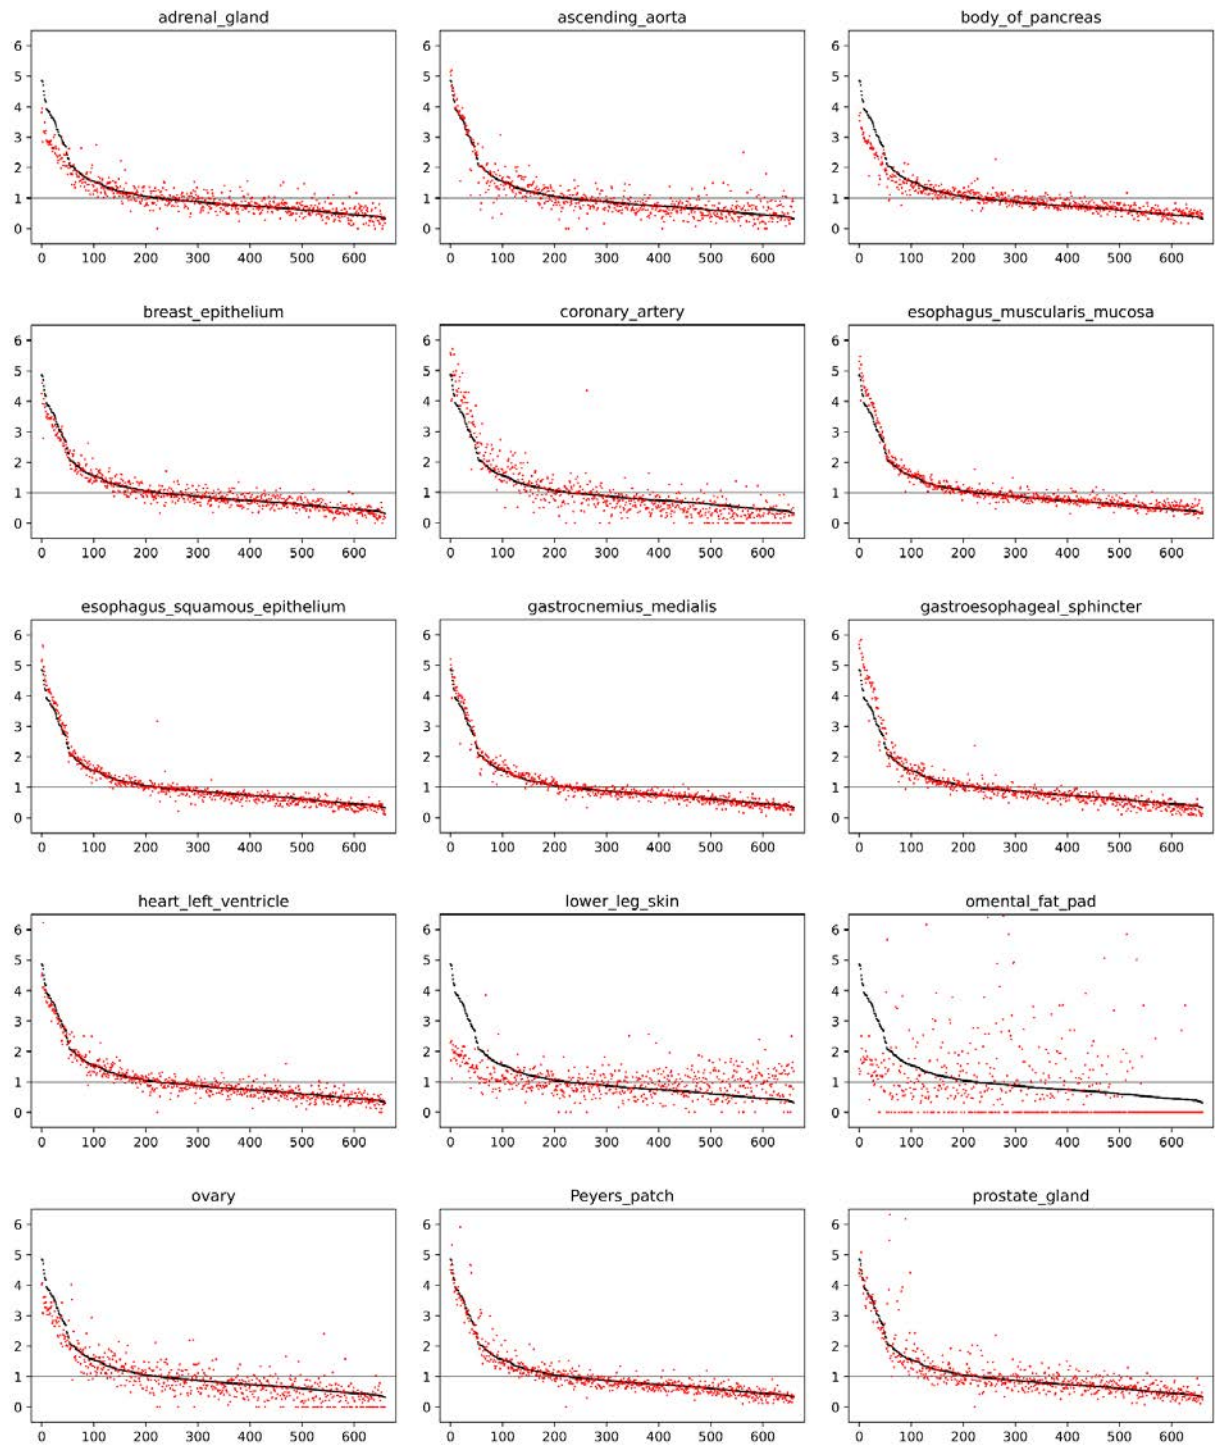

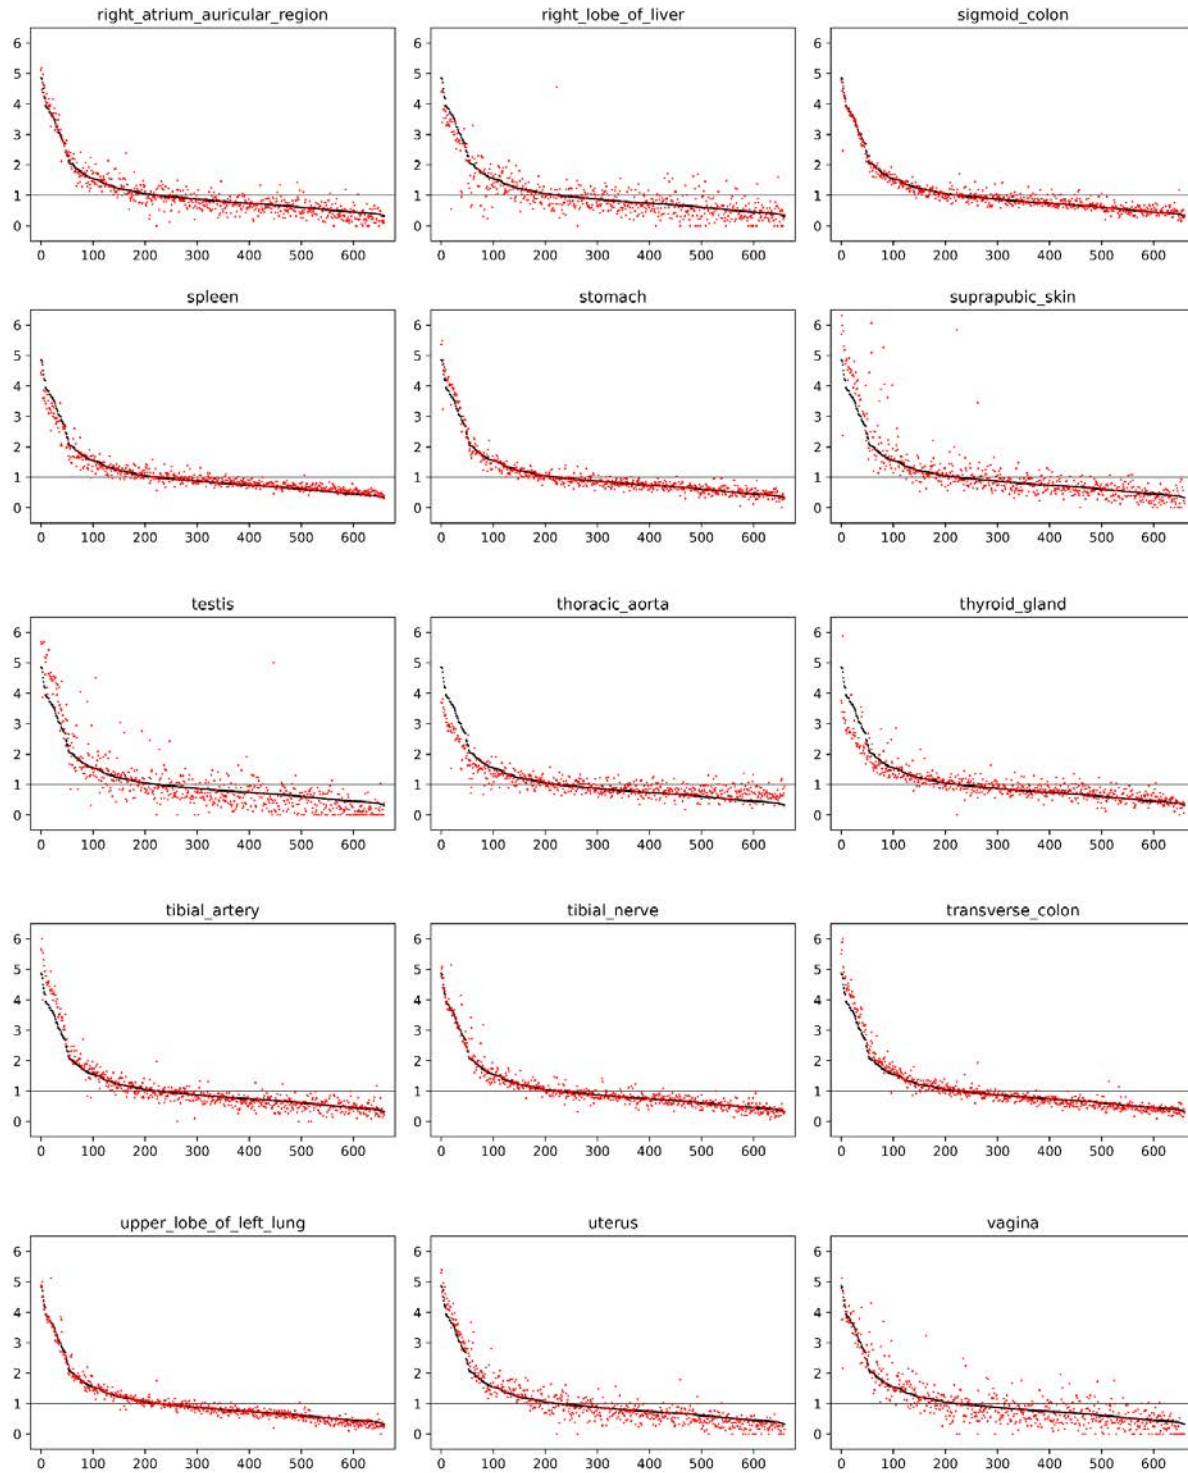



**J**

Motif+: the cCRE is overlapping any one of the **top 100** motifs

|             | Motif + | Motif - |
|-------------|---------|---------|
| AS cCRE     | 115934  | 149     |
| Non-AS cCRE | 5203820 | 10432   |

Odds ratio=1.56  
P<9.1e-9

Motif+: the cCRE is overlapping any one of the **bottom 100** motifs

|             | Motif + | Motif - |
|-------------|---------|---------|
| AS cCRE     | 59252   | 56831   |
| Non-AS cCRE | 3249317 | 1905683 |

Odds ratio=0.61  
P≈0

**K**

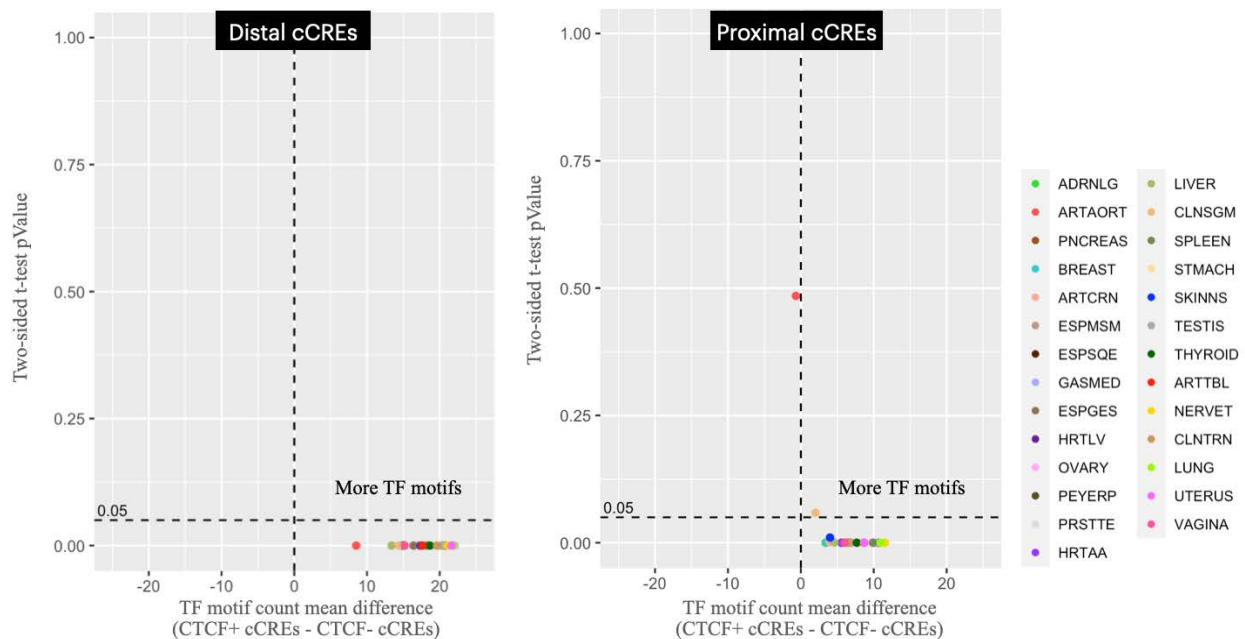

**Data S30. Motif analysis, related to Figure 6, Figure S7, and STAR Methods “Sensitive Motifs” Section**

(A) Similar to Figure 6A, among the accessible SNPs from CTCF ChIP-seq, AS SNPs occur more frequently in the key positions of the CTCF motif.

(B) For all CTCF accessible SNPs intersecting with the CTCF motif, >70% of the AS SNPs have more reads in the reference allele than the alternative allele. This number is ~60% for non-AS SNPs, indicating that the observation of AS is likely to be caused by the disruption of the motifs.

(C) The motif of transcription factor SP1. The logo is downloaded from the Cis-BP database. Among all AS SNVs that overlap with the SP1 motif, >40% occur at position 9 of the motif. For non-AS SNVs, they occur relatively randomly across all the positions of the motif.

(D) Similar to Figure 6A, for each TF motif, we made a 2-by-2 contingency table of the number of SNVs: the SNVs falling in motif or non-motif regions and SNVs being AS or non-AS. The



odds ratio of the table indicates the enrichment of AS SNVs for that motif. Figure shows the result using all accessible SNVs of all ChIP-seq (black) or using accessible SNVs from H3K27ac ChIP-seq (red) only. Each dot represents one motif. The x-axis represents the 660 TF motifs in the order based on the y-axis, the AS enrichment score.

**(E)** Similar to Figure S7A, we examined the motif ranks in each tissue individually. Unlike the bar plot in Figure S7A, we show the approximate density of the dots in the figure, demonstrating that the top 100 TF motifs have more consistent ranking across tissues.

**(F)** Motif ranking based on the enrichment of any ChIP-seq AS SNPs is not correlated with the entropy of the motifs.

**(G)** The same ranking is negatively correlated with the GC content, determined by the number of positions where C or G is the most frequent base, divided by the motif length.

**(H)** Comparison of motif ranking between using raw enrichment score and model residual. By using the residual, the potential effects of the C/G content and motif entropy are removed. The top 100 TF motifs from the original ranking are more consistent with the new ranking (with a Pearson correlation 0.637,  $p < 1.1 \times 10^{-12}$ ,  $n = 100$  motif ranks), than the rest (560) of the motifs (Pearson correlation 0.03,  $p < 0.416$ ,  $n = 560$  motif ranks). While the choice of 100 for the top motifs is somewhat arbitrary, there are three interlinked justifications for using it: (i) In this panel, the differential corrected performance between the first 100 and remaining motifs. (ii) In panel (I) and Figure 6, the enrichment score follows a linear trend at the tail but bends and rises rapidly around rank 100. (iii) In panel (E), greater cross-tissue consistency is evident for the first 100 motifs versus the remaining ones.

**(I)** Motif rank in each individual tissue. We examined the motif rank in each tissue (red dots) compared to the motif rank based on all aggregate tissue (black dots). In most cases, these ranks were similar to each other. The x-axis shows the 660 TF motifs ordered by the all-tissue-based rank. The y-axis shows the AS enrichment score by aggregating all experiments.

**(J)** Enrichment of AS sensitive or AS non-sensitive motifs in cCREs. We intersected all cCREs with the top 100 or bottom 100 motifs from the motif ranking. AS cCREs were significantly enriched with the top 100 motifs, while the non-AS cCREs contained more AS non-sensitive motifs (Fisher's exact test).

**(K)** Enrichment of TF motifs in CTCF+ cCREs. A list of 206 TF motifs (CTCF excluded) was used to count the total number of TF motifs that intersect with each CTCF+ and CTCF- cCRE in each tissue. For both distal and proximal cCREs, CTCF+ cCREs have significantly (paired-tissue two-sided t-test,  $p$ -value  $< 0.05$ ,  $n = 27$  tissues) more TF motifs than CTCF- cCREs.

**A**

| RF model on protein-coding genes |                          | Positive Size            | Negative Size   | Accuracy | Sensitivity | Specificity | MCC    | F1     | Precision | ROC_AUC | PR_AUC |        |        |
|----------------------------------|--------------------------|--------------------------|-----------------|----------|-------------|-------------|--------|--------|-----------|---------|--------|--------|--------|
| H3K27ac                          | No cross-individual      | Feature 1+2+3            | 1224            | 41005    | 0.8080      | 0.7895      | 0.8265 | 0.6164 | 0.8043    | 0.8198  | 0.8797 | 0.8967 |        |
|                                  |                          | Feature 1+2+3+4          | 1323            | 45889    | 0.8249      | 0.7926      | 0.8571 | 0.6512 | 0.8191    | 0.8474  | 0.8922 | 0.9088 |        |
|                                  | Cross-individual testing | Enc1                     | 424             | 12489    | 0.8518      | 0.8527      | 0.8586 | 0.2498 | 0.2246    | 0.1357  | 0.8137 | 0.3335 |        |
|                                  |                          | Enc2                     | 277             | 10373    | 0.8756      | 0.5025      | 0.8855 | 0.1872 | 0.1737    | 0.1051  | 0.7574 | 0.1969 |        |
|                                  |                          | Enc3                     | 275             | 11629    | 0.8549      | 0.6041      | 0.8608 | 0.1958 | 0.1615    | 0.0932  | 0.8171 | 0.1888 |        |
|                                  |                          | Enc4                     | 351             | 11388    | 0.8404      | 0.7504      | 0.8432 | 0.2665 | 0.2197    | 0.1287  | 0.8479 | 0.3665 |        |
|                                  | Independent testing      | STL002_3                 | 44              | 1070     | 0.7239      | 0.8726      | 0.7177 | 0.2504 | 0.2006    | 0.1135  | 0.8829 | 0.2842 |        |
|                                  | H3K4me3                  | No cross-individual      | Feature 1+2+3   | 1607     | 42579       | 0.7731      | 0.7449 | 0.8014 | 0.5472    | 0.7665  | 0.7896 | 0.8466 | 0.8721 |
|                                  |                          |                          | Feature 1+2+3+4 | 1738     | 48343       | 0.7995      | 0.7594 | 0.8397 | 0.6011    | 0.7912  | 0.8257 | 0.8686 | 0.8899 |
|                                  |                          | Cross-individual testing | Enc1            | 593      | 14424       | 0.8299      | 0.6428 | 0.8375 | 0.2429    | 0.2300  | 0.1401 | 0.7983 | 0.3510 |
| Enc2                             |                          |                          | 330             | 10799    | 0.8563      | 0.5304      | 0.8662 | 0.1909 | 0.1797    | 0.1082  | 0.7703 | 0.1968 |        |
| Enc3                             |                          |                          | 404             | 12503    | 0.8388      | 0.5878      | 0.8469 | 0.2031 | 0.1859    | 0.1104  | 0.8032 | 0.2126 |        |
| Enc4                             |                          |                          | 416             | 10610    | 0.8216      | 0.7285      | 0.8252 | 0.2661 | 0.2357    | 0.1406  | 0.8285 | 0.3661 |        |
| Independent testing              |                          | STL002_3                 | 23              | 51       | 0.6854      | 0.8872      | 0.6771 | 0.2317 | 0.1827    | 0.1019  | 0.8799 | 0.3082 |        |
| CTCF                             |                          | No cross-individual      | Feature 1+2+3   | 384      | 25040       | 0.7058      | 0.7017 | 0.7098 | 0.4119    | 0.7044  | 0.7077 | 0.7759 | 0.7903 |
|                                  |                          |                          | Feature 1+2+3+4 | 430      | 27755       | 0.7236      | 0.6978 | 0.7494 | 0.4480    | 0.7162  | 0.7359 | 0.7897 | 0.8156 |
|                                  |                          | Cross-individual testing | Enc1            | 64       | 6509        | 0.7491      | 0.6367 | 0.7502 | 0.0875    | 0.0472  | 0.0245 | 0.7661 | 0.0552 |
|                                  | Enc2                     |                          | 78              | 5907     | 0.8007      | 0.2885      | 0.8075 | 0.0276 | 0.0364    | 0.0194  | 0.5996 | 0.0207 |        |
|                                  | Enc3                     |                          | 152             | 7298     | 0.7364      | 0.5741      | 0.7398 | 0.1005 | 0.0817    | 0.0440  | 0.7120 | 0.0775 |        |
|                                  | Enc4                     |                          | 136             | 8033     | 0.7343      | 0.5804      | 0.7369 | 0.0918 | 0.0680    | 0.0361  | 0.6878 | 0.0674 |        |
|                                  | POLR2A                   | No cross-individual      | Feature 1+2+3   | 404      | 21092       | 0.7014      | 0.6884 | 0.7144 | 0.4032    | 0.6974  | 0.7070 | 0.7679 | 0.7948 |
|                                  |                          |                          | Feature 1+2+3+4 | 424      | 22436       | 0.7495      | 0.7192 | 0.7799 | 0.5002    | 0.7416  | 0.7659 | 0.8199 | 0.8445 |
|                                  |                          | Cross-individual testing | Enc1            | 54       | 4630        | 0.7878      | 0.5570 | 0.7905 | 0.0906    | 0.0571  | 0.0301 | 0.7435 | 0.0760 |
|                                  |                          |                          | Enc2            | 55       | 2914        | 0.8208      | 0.3738 | 0.8292 | 0.0722    | 0.0719  | 0.0398 | 0.6792 | 0.0664 |
| Enc3                             |                          |                          | 145             | 8195     | 0.7831      | 0.6674      | 0.7852 | 0.1424 | 0.0969    | 0.0523  | 0.7945 | 0.1095 |        |
| Enc4                             |                          |                          | 170             | 6699     | 0.7724      | 0.6288      | 0.7760 | 0.1489 | 0.1207    | 0.0668  | 0.7554 | 0.1402 |        |
| POLR2A phosphoS5                 |                          | No cross-individual      | Feature 1+2+3   | 235      | 10153       | 0.6611      | 0.6445 | 0.6776 | 0.3226    | 0.6552  | 0.6669 | 0.7204 | 0.7537 |
|                                  |                          |                          | Feature 1+2+3+4 | 241      | 10538       | 0.7172      | 0.6840 | 0.7505 | 0.4357    | 0.7074  | 0.7330 | 0.7856 | 0.8107 |
|                                  |                          | Cross-individual testing | Enc1            | 76       | 3400        | 0.7412      | 0.6102 | 0.7441 | 0.1178    | 0.0837  | 0.0508 | 0.7208 | 0.1163 |
|                                  |                          |                          | Enc2            | 15       | 601         | 0.7818      | 0.5721 | 0.7871 | 0.1335    | 0.1136  | 0.0631 | 0.7483 | 0.1364 |
|                                  | Enc3                     |                          | 57              | 3334     | 0.7778      | 0.4835      | 0.7829 | 0.0827 | 0.0685    | 0.0369  | 0.6904 | 0.0819 |        |
|                                  | Enc4                     |                          | 93              | 3207     | 0.7552      | 0.6024      | 0.7597 | 0.1386 | 0.1222    | 0.0680  | 0.7307 | 0.1688 |        |

**B**

| Association of features with ASB event |                                    | Positive_mean | Negative_mean | t.test p-value | R2 score | Assay           | RF feature importance |
|----------------------------------------|------------------------------------|---------------|---------------|----------------|----------|-----------------|-----------------------|
| Feature 1                              | Top100TF_motifSum_w_hetSNV         | 43            | 4             | < 2.2E-16      | 0.9421   | H3K27ac         | 0.3298                |
|                                        |                                    | 42            | 4             | < 2.2E-16      | 0.9495   | H3K4me3         | 0.3127                |
|                                        |                                    | 16            | 4             | < 2.2E-16      | 0.8736   | CTCF            | 0.1929                |
|                                        |                                    | 24            | 4             | < 2.2E-16      | 0.8895   | POLR2A          | 0.2359                |
|                                        |                                    | 26            | 4             | 1.156E-15      | 0.8469   | POLR2AphosphoS5 | 0.2442                |
| Feature 2                              | Top100TF_motifSum_nearby_hetSNV    | 91            | 49            | < 2.2E-16      | 0.8642   | H3K27ac         | 0.2263                |
|                                        |                                    | 89            | 48            | < 2.2E-16      | 0.9042   | H3K4me3         | 0.2285                |
|                                        |                                    | 63            | 44            | 1.092E-08      | 0.3008   | CTCF            | 0.2500                |
|                                        |                                    | 81            | 52            | < 2.2E-16      | 0.4165   | POLR2A          | 0.2371                |
|                                        |                                    | 73            | 49            | 2.757E-09      | 0.4254   | POLR2AphosphoS5 | 0.2347                |
| Feature 3                              | motifSum_distal_to_hetSNV          | 910           | 775           | < 2.2E-16      | 0.8035   | H3K27ac         | 0.2129                |
|                                        |                                    | 898           | 780           | < 2.2E-16      | 0.8067   | H3K4me3         | 0.2303                |
|                                        |                                    | 817           | 769           | 0.0004748      | 0.1409   | CTCF            | 0.2677                |
|                                        |                                    | 833           | 769           | 5.254E-06      | 0.3144   | POLR2A          | 0.2201                |
|                                        |                                    | 854           | 778           | 0.0002361      | 0.3184   | POLR2AphosphoS5 | 0.2302                |
| Feature 4                              | abs(RNAseq_hap1_allele_ratio -0.5) | 0.1403        | 0.0617        | < 2.2E-16      | 0.5884   | H3K27ac         | 0.2311                |
|                                        |                                    | 0.1289        | 0.0633        | < 2.2E-16      | 0.5612   | H3K4me3         | 0.2285                |
|                                        |                                    | 0.1461        | 0.0625        | < 2.2E-16      | 0.5062   | CTCF            | 0.2894                |
|                                        |                                    | 0.1638        | 0.0631        | < 2.2E-16      | 0.4754   | POLR2A          | 0.3069                |
|                                        |                                    | 0.1423        | 0.0610        | 7.64E-14       | 0.5420   | POLR2AphosphoS5 | 0.2909                |

**C**

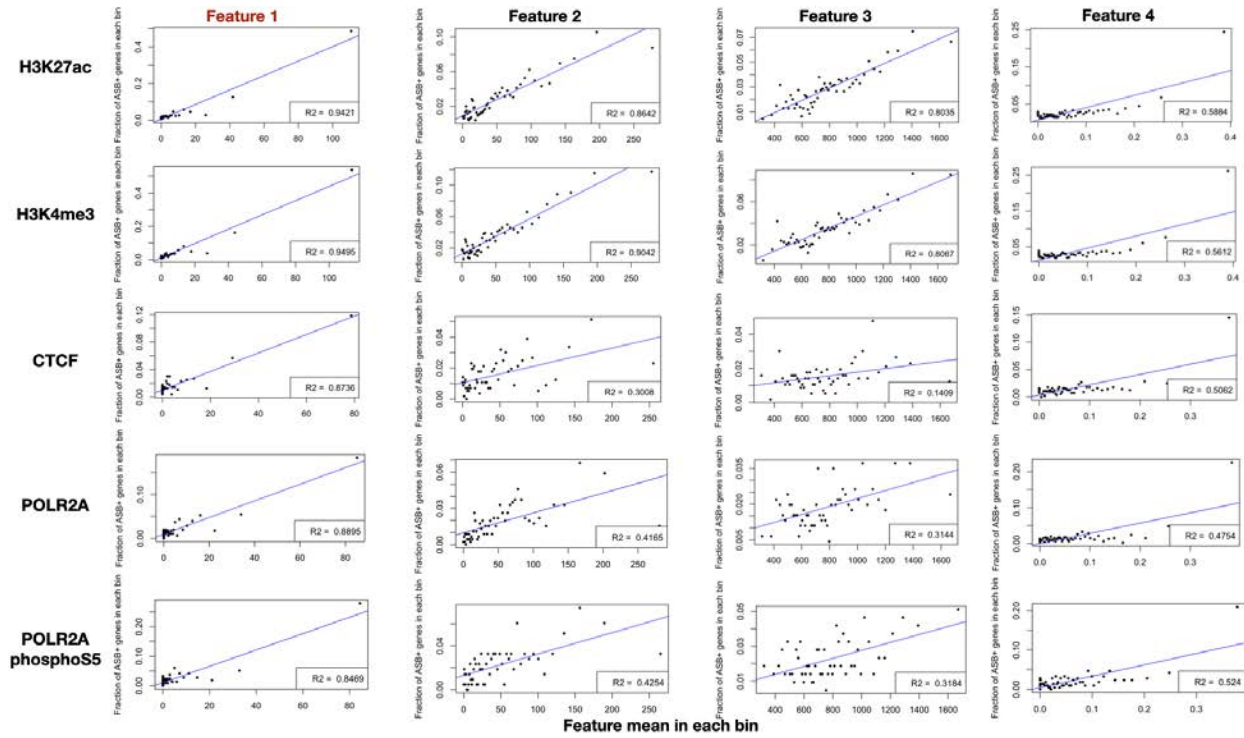

**D**

|                            |                                                                              |
|----------------------------|------------------------------------------------------------------------------|
| <b>ASE features</b>        | P value to be ASE+ gene (Redundant to <b>Feature 4</b> - hap1 allelic ratio) |
|                            | Gene expression level in FPKM                                                |
| <b>TF motif features</b>   | All 660 TF motif sum in the promoter                                         |
|                            | All 660 TF motif sum hit by the hetSNV in the promoter                       |
|                            | All 660 TF motif sum hit by accE hetSNV in the promoter                      |
|                            | Top 30 ranked TF motif sum hit by the hetSNV in the promoter                 |
| <b>hetSNV features</b>     | If the hetSNV is GTEx eQTL                                                   |
|                            | eQTL effect (slope absolute value)                                           |
| <b>Individual features</b> | The ratio of the promoter to be ASB+ in other EN-TEs individuals             |

E

| All gene types |      |        |         |        |        | Protein-coding genes |      |        |         |        |        |
|----------------|------|--------|---------|--------|--------|----------------------|------|--------|---------|--------|--------|
| H3K27ac        | ASB+ | ASB-   | No accB | Sum    | Sum    | H3K27ac              | ASB+ | ASB-   | No accB | Sum    | Sum    |
| ASE+           | 1402 | 8137   | 21384   | 30923  | 776187 | ASE+                 | 1112 | 6032   | 15625   | 22769  | 631104 |
| ASE-           | 3855 | 225461 | 515948  | 745264 |        | ASE-                 | 3270 | 189499 | 415566  | 608335 |        |
| H3K27me3       | ASB+ | ASB-   | No accB | Sum    | Sum    | H3K27me3             | ASB+ | ASB-   | No accB | Sum    | Sum    |
| ASE+           | 66   | 1697   | 29160   | 30923  | 776187 | ASE+                 | 35   | 1158   | 21576   | 22769  | 631104 |
| ASE-           | 133  | 29415  | 715716  | 745264 |        | ASE-                 | 107  | 22842  | 585386  | 608335 |        |
| H3K36me3       | ASB+ | ASB-   | No accB | Sum    | Sum    | H3K36me3             | ASB+ | ASB-   | No accB | Sum    | Sum    |
| ASE+           | 80   | 1147   | 29696   | 30923  | 776187 | ASE+                 | 18   | 695    | 22056   | 22769  | 631104 |
| ASE-           | 73   | 19991  | 725200  | 745264 |        | ASE-                 | 40   | 13352  | 594943  | 608335 |        |
| H3K4me1        | ASB+ | ASB-   | No accB | Sum    | Sum    | H3K4me1              | ASB+ | ASB-   | No accB | Sum    | Sum    |
| ASE+           | 118  | 2085   | 28720   | 30923  | 776187 | ASE+                 | 77   | 1556   | 21136   | 22769  | 631104 |
| ASE-           | 278  | 64460  | 680526  | 745264 |        | ASE-                 | 219  | 53777  | 554339  | 608335 |        |
| H3K4me3        | ASB+ | ASB-   | No accB | Sum    | Sum    | H3K4me3              | ASB+ | ASB-   | No accB | Sum    | Sum    |
| ASE+           | 1400 | 8560   | 20963   | 30923  | 776187 | ASE+                 | 1125 | 6491   | 15153   | 22769  | 631104 |
| ASE-           | 4527 | 229823 | 510914  | 745264 |        | ASE-                 | 3977 | 197771 | 406587  | 608335 |        |
| H3K9me3        | ASB+ | ASB-   | No accB | Sum    | Sum    | H3K9me3              | ASB+ | ASB-   | No accB | Sum    | Sum    |
| ASE+           | 25   | 529    | 30369   | 30923  | 776187 | ASE+                 | 7    | 293    | 22469   | 22769  | 631104 |
| ASE-           | 51   | 7994   | 737219  | 745264 |        | ASE-                 | 29   | 5433   | 602873  | 608335 |        |
| CTCF           | ASB+ | ASB-   | No accB | Sum    | Sum    | CTCF                 | ASB+ | ASB-   | No accB | Sum    | Sum    |
| ASE+           | 646  | 7505   | 22772   | 30923  | 776187 | ASE+                 | 476  | 5373   | 16920   | 22769  | 631104 |
| ASE-           | 1713 | 179835 | 563716  | 745264 |        | ASE-                 | 1434 | 147190 | 459711  | 608335 |        |
| EP300          | ASB+ | ASB-   | No accB | Sum    | Sum    | EP300                | ASB+ | ASB-   | No accB | Sum    | Sum    |
| ASE+           | 39   | 312    | 30572   | 30923  | 776187 | ASE+                 | 28   | 234    | 22507   | 22769  | 631104 |
| ASE-           | 128  | 11016  | 734120  | 745264 |        | ASE-                 | 100  | 9218   | 599017  | 608335 |        |
| POLR2A         | ASB+ | ASB-   | No accB | Sum    | Sum    | POLR2A               | ASB+ | ASB-   | No accB | Sum    | Sum    |
| ASE+           | 872  | 4590   | 25461   | 30923  | 776187 | ASE+                 | 634  | 3374   | 18761   | 22769  | 631104 |
| ASE-           | 2450 | 133225 | 609589  | 745264 |        | ASE-                 | 2024 | 111066 | 495245  | 608335 |        |
| POLR2Apho      | ASB+ | ASB-   | No accB | Sum    | Sum    | POLR2Apho            | ASB+ | ASB-   | No accB | Sum    | Sum    |
| ASE+           | 425  | 1878   | 28620   | 30923  | 776187 | ASE+                 | 309  | 1376   | 21084   | 22769  | 631104 |
| ASE-           | 1383 | 60965  | 682916  | 745264 |        | ASE-                 | 1115 | 50458  | 556762  | 608335 |        |
| ATAC           | ASB+ | ASB-   | No accB | Sum    | Sum    | ATAC                 | ASB+ | ASB-   | No accB | Sum    | Sum    |
| ASE+           | 653  | 5048   | 25222   | 30923  | 776187 | ASE+                 | 481  | 3696   | 18592   | 22769  | 631104 |
| ASE-           | 2868 | 109180 | 633216  | 745264 |        | ASE-                 | 2438 | 89692  | 516205  | 608335 |        |
| DNase          | ASB+ | ASB-   | No accB | Sum    | Sum    | DNase                | ASB+ | ASB-   | No accB | Sum    | Sum    |
| ASE+           | 1077 | 8071   | 21775   | 30923  | 776187 | ASE+                 | 787  | 5824   | 16158   | 22769  | 631104 |
| ASE-           | 4805 | 192779 | 547680  | 745264 |        | ASE-                 | 4035 | 157411 | 446889  | 608335 |        |

F

| Feature Type                           | Feature Description                                     | Tested Feature Number                                                  | Positive                                               | Negative                   | ENTE <sub>x</sub> Performance (ROC_AUC   PR_AUC) |             |             |
|----------------------------------------|---------------------------------------------------------|------------------------------------------------------------------------|--------------------------------------------------------|----------------------------|--------------------------------------------------|-------------|-------------|
| ASB promoter annotation based features | ASB+ = (0,0,1)<br>ASB - = (0,1,0)<br>non-accB = (1,0,0) | Protein-coding genes                                                   | 10 <sup>3</sup>                                        | 117                        | 707                                              | <b>0.87</b> | <b>0.88</b> |
|                                        |                                                         | Protein-coding genes                                                   | 12 <sup>3</sup>                                        | 237                        | 1807                                             | <b>0.88</b> | <b>0.88</b> |
|                                        |                                                         | Protein-coding genes, FPKM >1                                          | 12 <sup>3</sup>                                        | 158                        | 1608                                             | <b>0.87</b> | <b>0.88</b> |
|                                        |                                                         | Protein-coding genes having 1 hetSNV in promoter                       | 12 <sup>3</sup> -1 (H3K9me3 no ASB+)                   | 51 (overfit)               | 1011                                             | 0.73        | 0.72        |
|                                        |                                                         | Protein-coding genes having 1 hetSNV in promoter, FPKM>1               | 12 <sup>3</sup> -1                                     | 37 (overfit)               | 913                                              | 0.73        | 0.73        |
|                                        |                                                         | Protein-coding genes having 1 hetSNV in promoter + eQTL                | 12 <sup>3</sup> -1 +1                                  | 51 (overfit)               | 1011                                             | 0.78        | 0.76        |
|                                        |                                                         | Protein-coding genes having 1 hetSNV in promoter + eQTL + housekeeping | 12 <sup>3</sup> -1 +1 +1                               | 51 (overfit)               | 1011                                             | 0.74        | 0.73        |
| Validation Data                        | Feature Description                                     | Available Feature Number                                               |                                                        |                            |                                                  |             |             |
| STL002                                 | ASB+ = (0,0,1)<br>ASB - = (0,1,0)<br>non-accB = (1,0,0) | Protein-coding genes                                                   | 3                                                      | H3K27ac/ H3K36me3/ H3K4me1 |                                                  |             |             |
| STL003                                 |                                                         | 3                                                                      | H3K27ac/ H3K27me3/ H3K36me3/ H3K4me1/ H3K4me3/ H3K9me3 |                            |                                                  |             |             |
| NA12878                                |                                                         | 5                                                                      | H3K4me3/ CTCF/ EP300/ POLR2A/ POLR2AphosphoS5          |                            |                                                  |             |             |

**Data S31. Predicting ASB from ASE, related to Figure 6, Figure S7, and STAR Methods “AS Promoter” Section**

(A) Performance validation of models predicting AS bound promoters for each assay. Models were trained separately for each assay with enough training data, including H3K27ac, H3K4me3, CTCF, POLR2A, and POLR2AphosphoS5. We targeted protein-coding genes with



exactly one hetSNV in the promoter region ( $\pm 1$  Kb of the TSS), and the ASB states of the hetSNV and the promoter were examined for consistency. For “no cross-individual” training/testing, sub-models were trained and tested with balanced data composed of the same set of positives and different subsets of negatives. For each sub-model, a five-fold cross validation strategy was used. Different sets of features (see panel B for feature description) were tested for improved model performance. For cross-individual testing, for each of the four EN-TE<sub>x</sub> individuals, sub-models were trained with balanced data from the other three individuals and tested on the imbalanced data from the targeting individual. For independent testing, sub-models were trained with balanced EN-TE<sub>x</sub> data, including the four individuals, and tested on the imbalanced integrated data from Roadmap individuals STL002 and STL003. For all the metrics, the average performances of the sub-models are shown in the table.

**(B)** Association analysis between features and the promoter ASB events. To predict the ASB state of a gene promoter, a random forest model was built using four features: three TF motif-based features of the promoter region and one ASE feature of the gene. The three motif-based features are the total number of top-100-ranked TF motifs intersecting the hetSNV in the promoter, the total number of top-100-ranked TF motifs nearby (200 bp window centered on the hetSNV) but not intersecting the hetSNV in the promoter, and the total number of all 660 human TF motifs distal to the hetSNV in the promoter; the ASE feature is the imbalance ratio of gene expression between the haplotypes. Other features (including gene expression level, eQTL, all 660 non-ranked TF features in the promoter) were tested but proven not to be informative (panel D). For each assay, we investigated the association of each feature with ASB promoters. Welch’s two-sample t-test (two-tailed) was performed for each feature between ASB and non-ASB promoters. To test if each feature is positively correlated with ASB promoters, an R<sup>2</sup> score was calculated (panel C). A larger R<sup>2</sup> value indicates a stronger association between the targeted feature and the ASB event of the promoters. Datasets were shuffled 100 times and an averaged R<sup>2</sup> score is shown in the table. For each feature, a random forest-based feature importance score is shown, which is the average of sub-random forest models trained from the balanced EN-TE<sub>x</sub> data composed of the same set of positives and different subsets of negatives. Protein-coding genes with one hetSNV in their promoters were used to train the model.

**(C)** Scatter plots for the association analysis between features and the promoter ASB events. First, for each assay, the whole dataset including all ASB and non-ASB promoters was ranked by the value of the targeting feature in an ascending order. Second, the ranked dataset was split into 50 bins. For each bin, we calculated the mean value of the targeting feature (x-axis) and the ratio of ASB promoters in the bin (y-axis), followed by a scatter plot shown above. For all assays, feature 1 (total number of top-100-ranked TF motifs intersecting the hetSNV in the promoter) showed the strongest association with the ASB promoters.

**(D)** Features tested but not informative for the prediction of ASB promoters. To build a machine-learning model to predict ASB promoters, many other features were tested but not included in the final model since they did not improve the model performance.

**(E)** Contingency table for ASE genes and ASB promoters. For each assay, the number of ASE genes with ASB promoters is shown. “No accB” represents promoters that are not accessible for the assay.

**(F)** Features and performance of a model to predict ASE for a gene from ASB on the associated promoter. In addition to the 'ASB from ASE' model, we constructed a model to predict ASE from ASB (going in the "forward" direction). The features of this model are summarized in this table; here, we used epigenetics as opposed to sequence features (as we did in the "reverse" model in panel B). As shown in the feature description, different gene sets were tested to train the model. Other features that were tested but not informative included whether the hetSNV in the promoter was eQTL or whether the gene was a housekeeping gene. Overall, the model performed well on the EN-TEx samples, but we do not have enough validation data on STL002, STL003, or NA12878 to properly evaluate the model.



**A**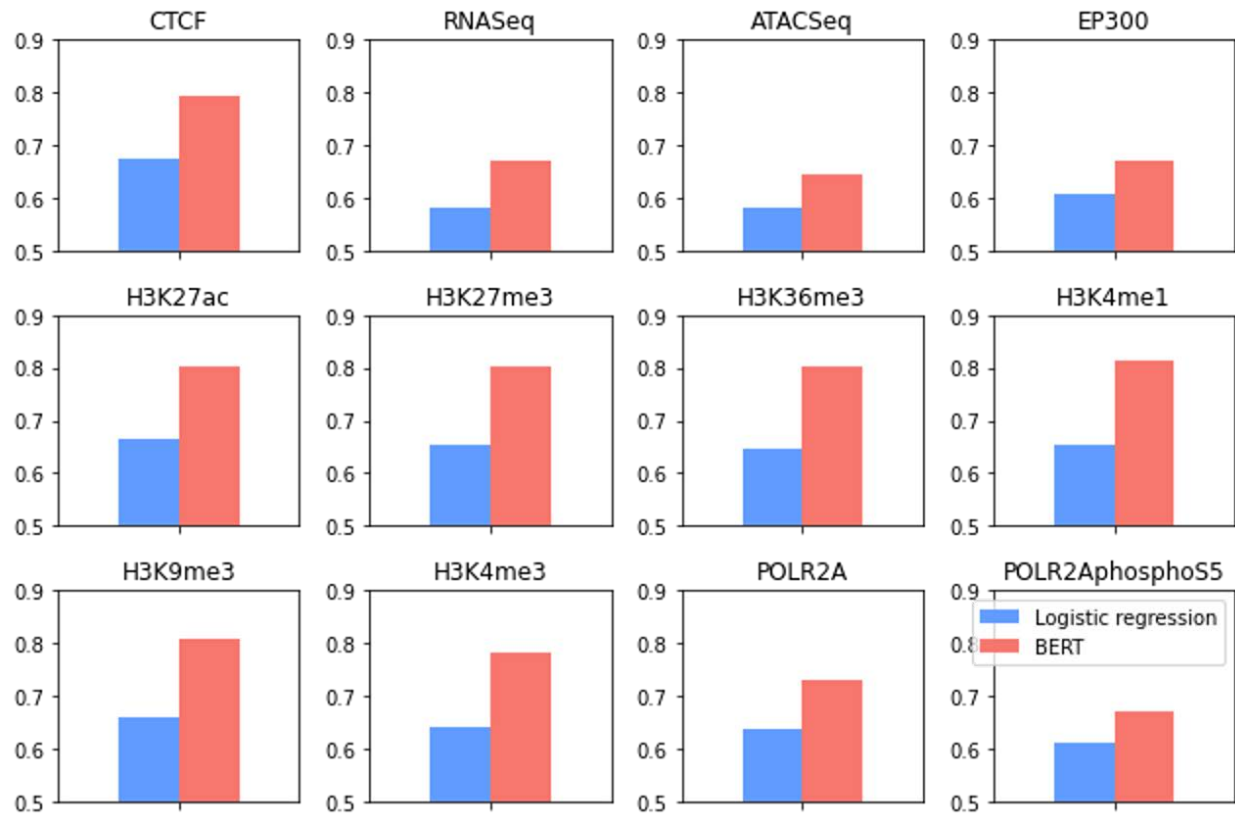**B**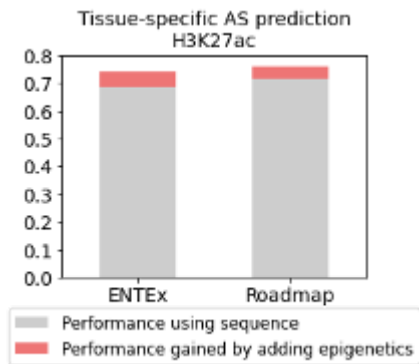



**D**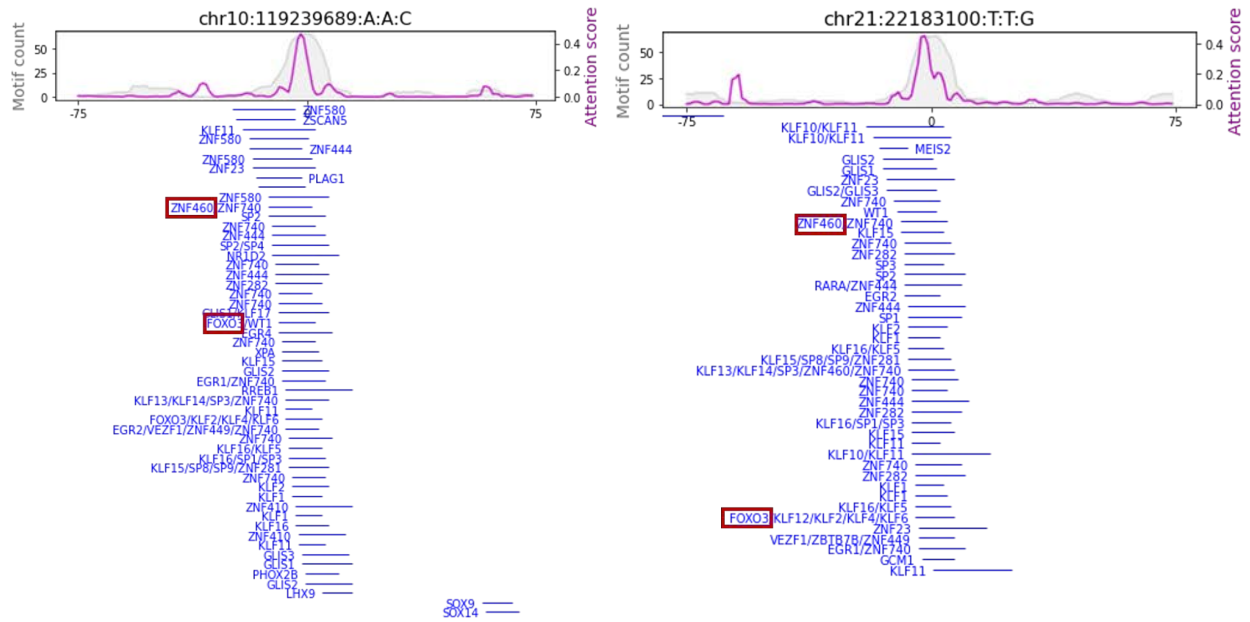**E**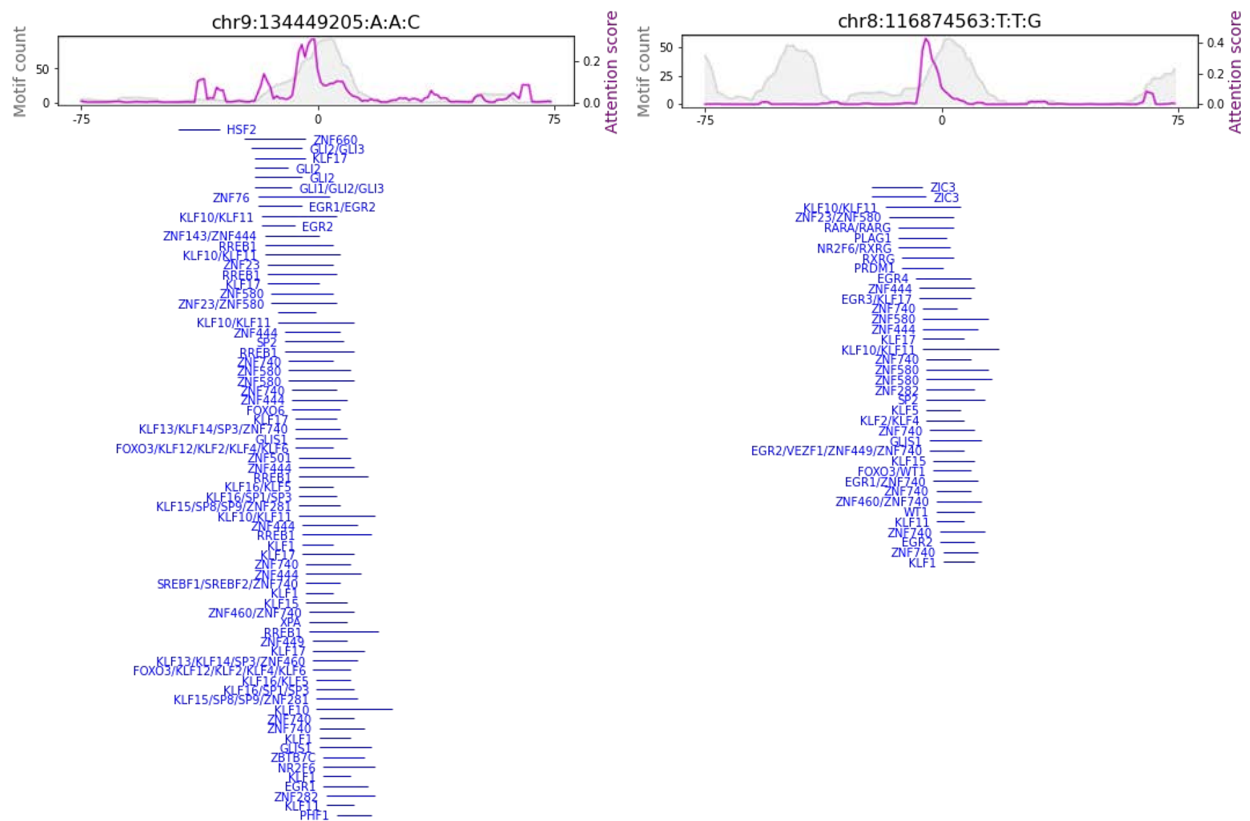

**F**

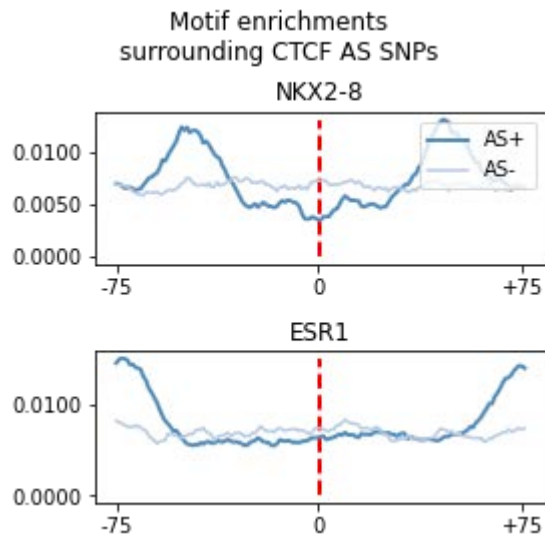

**Data S32. Deep-learning model predicting AS activity from nucleotide sequence, related to Figure 7, Figure S7, and STAR Methods “Transformer Model” Section**

**(A)** Performance of trained allelic effect prediction models. “Logistic regression” results were derived from simple logistic regression on the dna2vec embedding of the input sequence; “BERT” results were derived from the fine-tuned DNABERT model. Both models were trained on SNPs from individual 3, and the results are reported for the validation sets from all four individuals.

**(B)** Tissue-specific performance (AUROC) in H3K27ac (with Roadmap external validation).

**(C)** Additional examples of attention patterns learned by the model (CTCF). The upper panel shows the attention pattern (red line) and motif count (gray) of the proximal region of the given SNV. The lower panel shows the motifs discovered in the region. Note the overlap between attention peaks and the enrichment of motif instances. Some motifs are shown to have generically higher enrichment at the SNV position as well (see Figure 7).

**(D)** Additional examples of attention patterns learned by the model (H3K4me3). FOXO3 and ZNF460 are highlighted.

**(E)** Additional examples of attention patterns learned by the model (H3K9me3).

**(F)** Motifs that peak in the proximity of the AS CTCF SNPs.



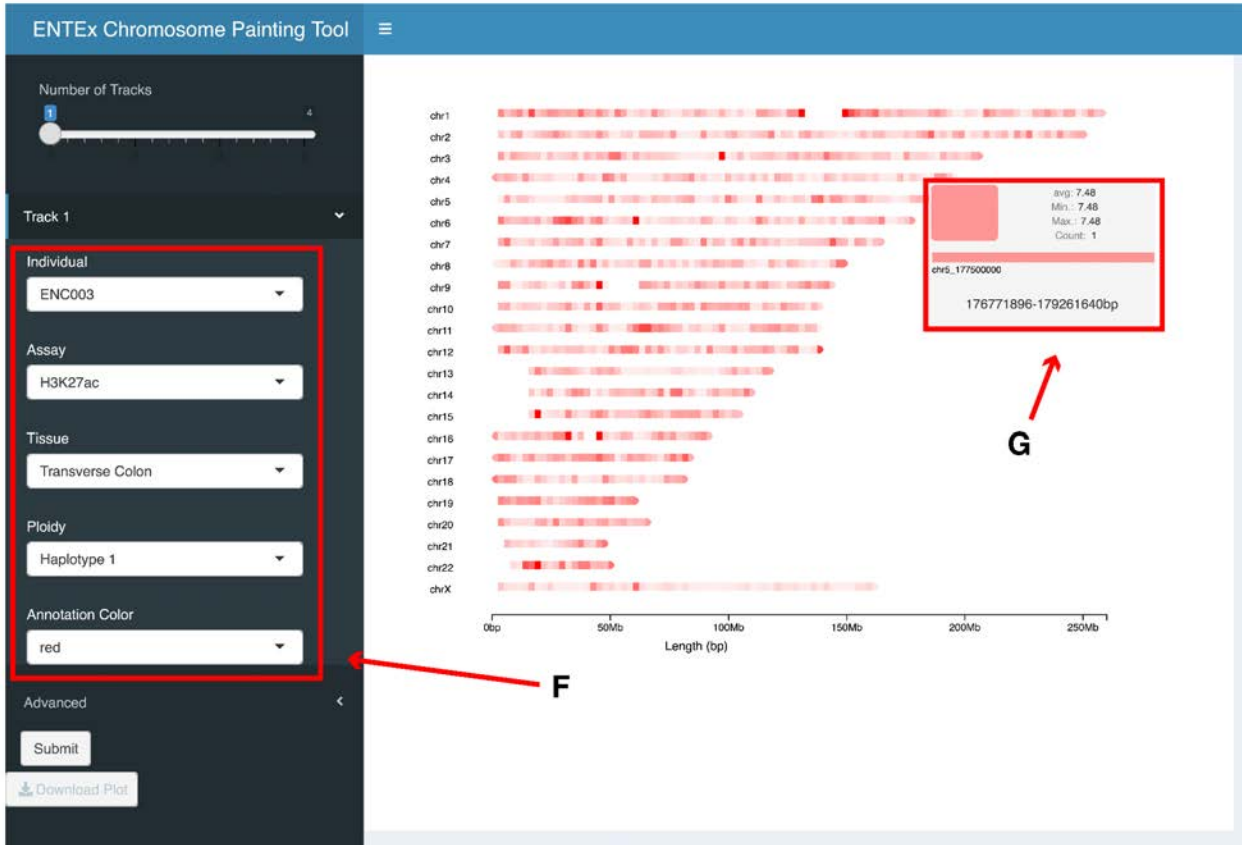



H

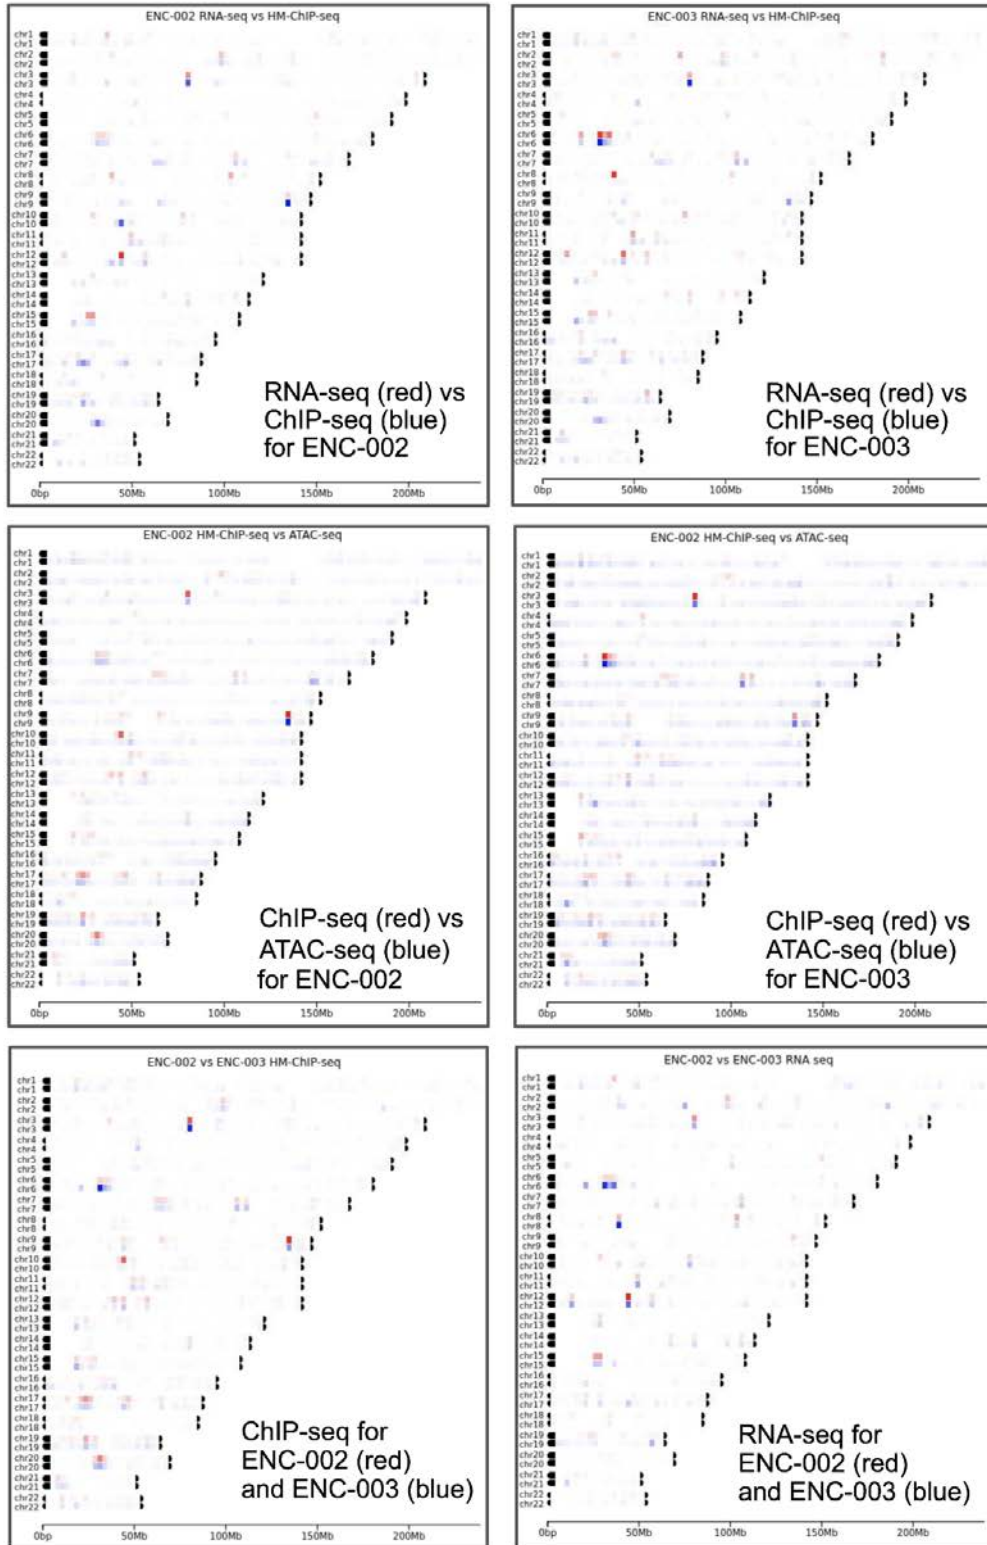

chr11:5205263-5381894

Enter a gene name or alias, a SNP rsID, a cCRE accession, or a genomic region in the form chr:start-end. You may also enter a cell type name to filter results.  
Examples: "K562 chr11:5205263-5381894", "SOX4", "rs4846913", "EH38E1613479"

**Search Human** (GRCh38, Registry V3) **Search Mouse** (mm10, Registry V3)

Pressing enter in the search box searches GRCh38. To search mm10, click the button above.

---

cCRE Search Results | Bed Upload | cCRE Details

Genome Browser View | Table View

GRCh38:chr11

move <<< << < > >> >>> zoom in 1.5x 3x 10x zoom out 1.5x 3x 10x 100x

All cCREs colored by group

---

cCRE Search Results | Bed Upload | cCRE Details

**EH38E2941857** chr11:5,224,606-5,224,887 P

In Specific Biosamples | Nearby Genomic Features | TF and His-mod Intersection | TF Motifs and Sequence Features | Associated Gene Expression | Associated RAMPAGE Signal | Linked cCREs in other Assemblies | Functional Data

EN-TEX States | Signal Profile | Linked Genes

Cell type agnostic classification

Search:

| Cell Type          | DNase max-Z | H3K4me3 max-Z | H3K27ac max-Z | CTCF max-Z | Group                          |
|--------------------|-------------|---------------|---------------|------------|--------------------------------|
| cell type agnostic | 6.04        | 4.76          | 2.69          | 1.46       | <b>promoter-like signature</b> |

Total:

---

**EH38E2941857** chr11:5,224,606-5,224,887 P

In Specific Biosamples | Nearby Genomic Features | TF and His-mod Intersection | TF Motifs and Sequence Features | Associated Gene Expression | Associated RAMPAGE Signal | Linked cCREs in other Assemblies | Functional Data

EN-TEX States | Signal Profile | Linked Genes

Table View | Browser View

download filter items

| tissue           | state     | CTCF-bound | TSS proximal | allele specific |
|------------------|-----------|------------|--------------|-----------------|
| adrenal gland    | repressed | no         | no           | no              |
| body of pancreas | repressed | no         | no           | no              |
| Peyers patch     | repressed | no         | no           | no              |
| spleen           | repressed | no         | no           | no              |
| testis           | repressed | no         | no           | no              |

**Data S33. Visualization of EN-TEX data, related to STAR Methods “Portal” Section (A) - (E) Explorer tool.** (A) Dimensionality reduction of the EN-TEX Explorer Tool allows for the generation of low-dimensional plots of several assays comprising cCREs, genomic expression,

and proteomic expression. Data are primarily reduced to ten dimensions through PCA, VAE, UMAP, or PHATE. Components of the result can be plotted against each other (e.g., principal component 1 vs. principal component 2 on a scatter plot), summarized based on the reduction method, or reduced further with t-SNE. It is also possible to rapidly view different configurations of preprocessing parameters (scaling, normalization, feature variance) or hyperparameters through extensive precomputation. (B) Interactive reduction 2D and 3D visualizations are also included for intuitively exploring the data. (C) UpSetR plots visualize the intersection of genes in various tissues, replacing the traditional Venn diagram for larger sets. In the context of EN-TE<sub>x</sub>, these tools apply user-defined thresholds for each gene, consider the fraction of samples for which a gene is present in a particular tissue, and then calculate the UpSetR plot. (D) Heatmaps, which can also have dendrograms applied, visualize the data that are aggregated in the UpSetR plot. (E) The numeric data and metadata for all results can be bookmarked or downloaded for rapid sharing or analysis. Note that the input files for the explorer tool are available from the EN-TE<sub>x</sub> portal.

**(F) - (G)** Screenshot of the EN-TE<sub>x</sub> chromosome painting tool. (F) Parameters for data visualization of the EN-TE<sub>x</sub> data. (G) Plots generated by the chromosome painting tool are interactive.

**(H)** Examples of the chromosome painting tool.

**(I)** Viewing EN-TE<sub>x</sub> decoration on the SCREEN website. This shows views of the SCREEN website ([screen.encodeproject.org](https://screen.encodeproject.org)) that indicate how to access the EN-TE<sub>x</sub> decoration of the ENCODE cCREs.

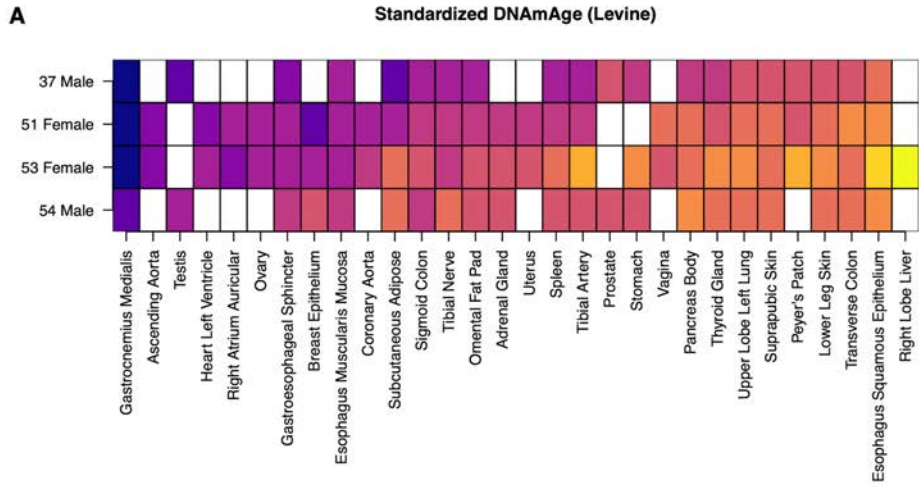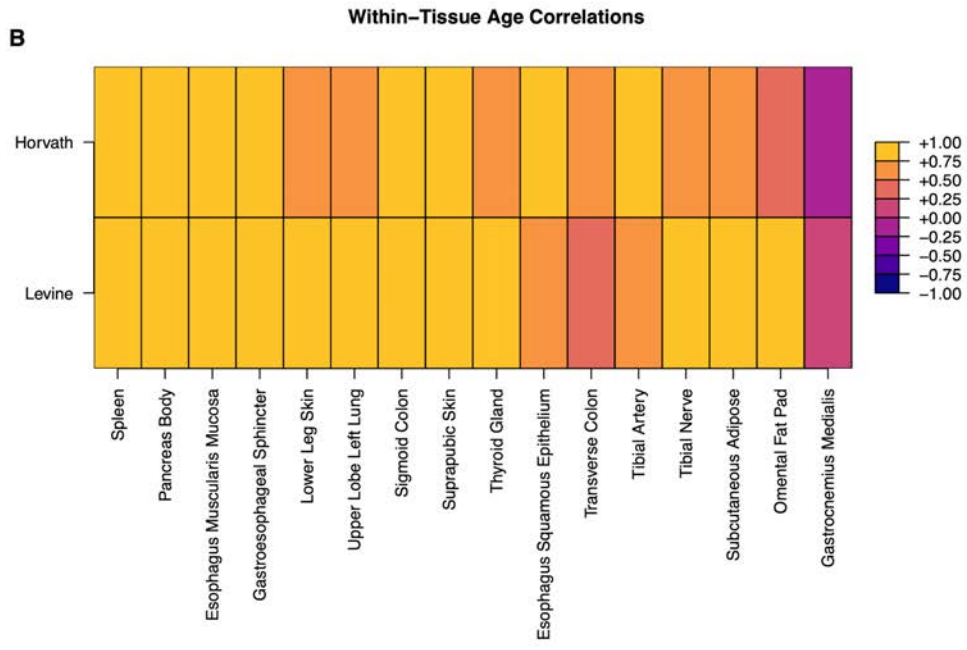

C

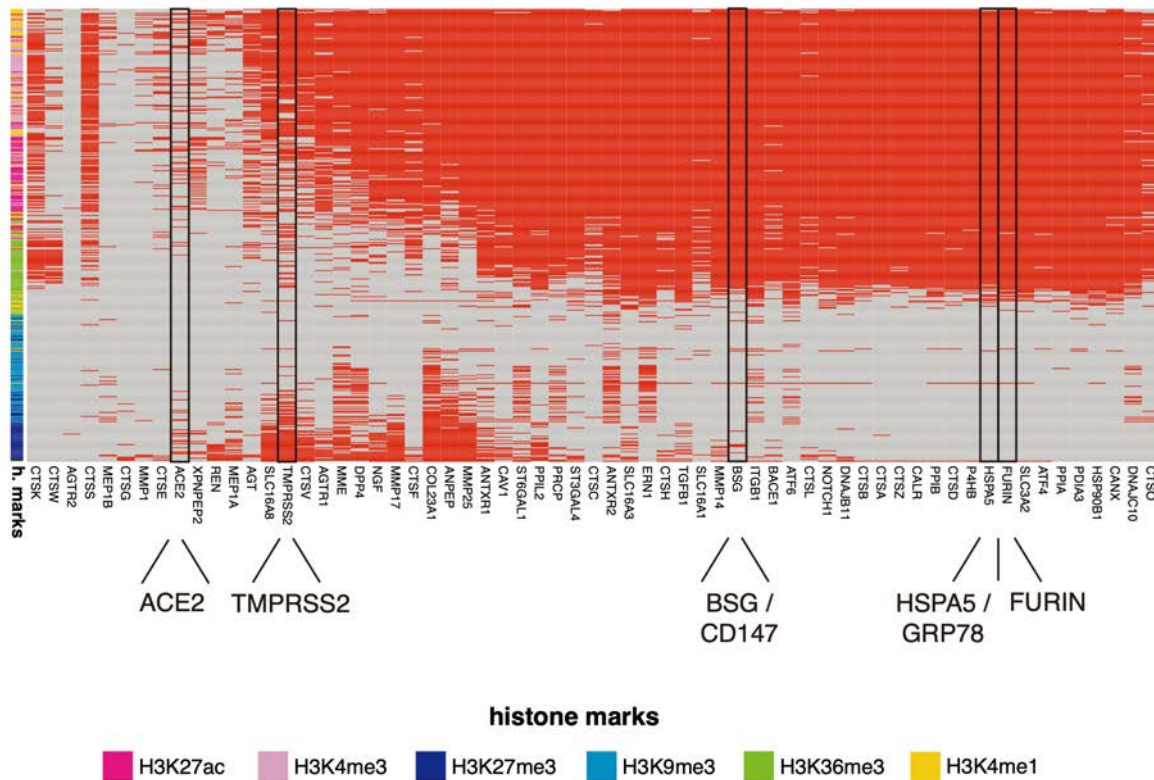

**Data S34. Additional analyses with EN-TE<sub>x</sub> data but outside of the scope of this study**

**(A) - (B)** Predicting the ages of tissues from their DNA methylation status. The statistical model developed by Levine et al.<sup>22</sup> was used to predict the ages of the different tissues from the four individuals. The different tissues of the same individuals showed different predicted ages (A). However, for each tissue type, the predicted ages and the actual ages of the four individuals tend to be highly correlated (B), suggesting that the model is accurate for capturing the changes in tissues with actual aging. The high correlation is also observed using other predictive models<sup>23</sup>. Taken together, these results suggest that the different tissues age at different speeds.

**(C)** Histone ChIP-seq data for COVID19-related genes. Chromatin marking of COVID-19-related genes. The heatmap represents the presence/absence (red/gray) of patterns of ChIP-seq peaks for the six histone marks assayed across the EN-TE<sub>x</sub> tissues. The list of 63 genes includes *ACE2*, *CD147*, *FURIN*, *GRP78*, and their protein interactors as retrieved from STRING ([https://string-db.org/cgi/input?sessionId=bDjsdV72Wbsr&input\\_page\\_show\\_search=off](https://string-db.org/cgi/input?sessionId=bDjsdV72Wbsr&input_page_show_search=off))<sup>24</sup>. Additional COVID-19/SARS-CoV-2 entry-associated genes proposed by the COVID19 Cell Atlas (<https://www.covid19cellatlas.org/index.healthy.html>), such as *TMPRSS2*, are also included in Sungnak et al.<sup>25</sup>.

EN-TE<sub>x</sub> ENC002 hetSNVs VS GTE<sub>x</sub> ENC002

• transverse\_colon

| Match criteria  | (chr, position, ref, alt, gt) |                     |                  |                  | (chr, position, ref, alt) |
|-----------------|-------------------------------|---------------------|------------------|------------------|---------------------------|
|                 | Heterozygous                  |                     | Homozygous       |                  | All                       |
| Type            |                               |                     |                  |                  |                           |
| Source          | EN-TE <sub>x</sub>            | GTE <sub>x</sub>    | GTE <sub>x</sub> | GTE <sub>x</sub> | GTE <sub>x</sub>          |
| Genotype        | 0 1 or 1 0                    | 0 1                 | 0 0              | 1 1              | . . 0 0, 0 1, 1 1         |
| ASE+            | 1,600                         | 3,264,055           | 61,417,453       | 1,780,534        | 66,463,168                |
|                 |                               | 1,067<br>(66.69%)   | 235<br>(14.69%)  | 63<br>(3.94%)    | 1365<br>(85.31%)          |
| ASE-            | 54,485                        | 3,264,055           | 61,417,453       | 1,780,534        | 66,463,168                |
|                 |                               | 53,672<br>(98.51%)  | 441<br>(0.81%)   | 28<br>(0.05%)    | 54,142<br>(99.37%)        |
| ASB+<br>(HM+TF) | 4,498                         | 3,264,055           | 61,417,453       | 1,780,534        | 66,463,168                |
|                 |                               | 2,491<br>(55.38%)   | 756<br>(16.81%)  | 310<br>(6.89%)   | 3,557<br>(79.08%)         |
| ASB-<br>(HM+TF) | 259,038                       | 3,264,055           | 61,417,453       | 1,780,534        | 66,463,168                |
|                 |                               | 246,713<br>(95.24%) | 6,756<br>(2.61%) | 477<br>(0.18%)   | 253,946<br>(98.03%)       |

• spleen

| Match criteria  | (chr, position, ref, alt, gt) |                     |                   |                  | (chr, position, ref, alt) |
|-----------------|-------------------------------|---------------------|-------------------|------------------|---------------------------|
|                 | Heterozygous                  |                     | Homozygous        |                  | All                       |
| Type            |                               |                     |                   |                  |                           |
| Source          | EN-TE <sub>x</sub>            | GTE <sub>x</sub>    | GTE <sub>x</sub>  | GTE <sub>x</sub> | GTE <sub>x</sub>          |
| Genotype        | 0 1 or 1 0                    | 0 1                 | 0 0               | 1 1              | . . 0 0, 0 1, 1 1         |
| ASE+            | 315                           | 3,264,055           | 61,417,453        | 1,780,534        | 66,463,168                |
|                 |                               | 175<br>(55.56%)     | 53<br>(16.83%)    | 12<br>(3.81%)    | 240<br>(76.19%)           |
| ASE-            | 13,960                        | 3,264,055           | 61,417,453        | 1,780,534        | 66,463,168                |
|                 |                               | 13,697<br>(98.12%)  | 152<br>(1.09%)    | 15<br>(0.11%)    | 13,864<br>(99.31%)        |
| ASB+<br>(HM+TF) | 14,645                        | 3,264,055           | 61,417,453        | 1,780,534        | 66,463,168                |
|                 |                               | 8,477<br>(57.88%)   | 2,423<br>(16.54%) | 986<br>(6.73%)   | 11,886<br>(81.16%)        |
| ASB-<br>(HM+TF) | 838,756                       | 3,264,055           | 61,417,453        | 1,780,534        | 66,463,168                |
|                 |                               | 815,653<br>(97.25%) | 12,574<br>(1.5%)  | 852<br>(0.1%)    | 829,080<br>(98.85%)       |

**Data S35. Coverage of EN-TE<sub>x</sub> AS hetSNVs in GTE<sub>x</sub>-corresponding individual tissue, related to STAR Methods “AS Calling” Section**

This comparison was performed on two tissues from individual 2. For each of the four categories of hetSNVs called in EN-TE<sub>x</sub>, the number and percentage of EN-TE<sub>x</sub> hetSNVs detected in GTE<sub>x</sub> were calculated. For ASB hetSNVs, the call sets from all available histone marks (HMs) and TFs were integrated without duplications. Note that the somatic mutations in the colon can be potentially measured by comparing with the genome sequencing done in the blood by GTE<sub>x</sub>. The slightly lower overlap for the colon active region as compared to the spleen might reflect the greater number of somatic mutations in the colon as compared to blood (from which the GTE<sub>x</sub> sequencing is derived).



## References

1. Muller-Felber, W., Vill, K., Schwartz, O., Glaser, D., Nennstiel, U., Wirth, B., Burggraf, S., Roschinger, W., Becker, M., Durner, J., et al. (2020). Infants Diagnosed with Spinal Muscular Atrophy and 4 SMN2 Copies through Newborn Screening - Opportunity or Burden? *J Neuromuscul Dis* 7, 109-117. 10.3233/JND-200475.
2. Son, Y.S., Choi, K., Lee, H., Kwon, O., Jung, K.B., Cho, S., Baek, J., Son, B., Kang, S.M., Kang, M., et al. (2019). A SMN2 Splicing Modifier Rescues the Disease Phenotypes in an In Vitro Human Spinal Muscular Atrophy Model. *Stem Cells Dev* 28, 438-453. 10.1089/scd.2018.0181.
3. Mujahid, N., Liang, Y., Murakami, R., Choi, H.G., Dobry, A.S., Wang, J., Suita, Y., Weng, Q.Y., Allouche, J., Kemeny, L.V., et al. (2017). A UV-Independent Topical Small-Molecule Approach for Melanin Production in Human Skin. *Cell Rep* 19, 2177-2184. 10.1016/j.celrep.2017.05.042.
4. Hansen, J., Snow, C., Tuttle, E., Ghoneim, D.H., Yang, C.S., Spencer, A., Gunter, S.A., Smyser, C.D., Gurnett, C.A., Shinawi, M., et al. (2015). De novo mutations in SIK1 cause a spectrum of developmental epilepsies. *Am J Hum Genet* 96, 682-690. 10.1016/j.ajhg.2015.02.013.
5. Proschel, C., Hansen, J.N., Ali, A., Tuttle, E., Lacagnina, M., Buscaglia, G., Halterman, M.W., and Paciorkowski, A.R. (2017). Epilepsy-causing sequence variations in SIK1 disrupt synaptic activity response gene expression and affect neuronal morphology. *Eur J Hum Genet* 25, 216-221. 10.1038/ejhg.2016.145.
6. Dianzani, U., Massaia, M., Pileri, A., Grossi, C.E., and Clement, L.T. (1986). Differential expression of ecto-5' nucleotidase activity by functionally and phenotypically distinct subpopulations of human Leu-2+/T8+ lymphocytes. *J Immunol* 137, 484-489.
7. Fang, F., Hodges, E., Molaro, A., Dean, M., Hannon, G.J., and Smith, A.D. (2012). Genomic landscape of human allele-specific DNA methylation. *Proc Natl Acad Sci U S A* 109, 7332-7337. 10.1073/pnas.1201310109.
8. Mugford, J.W., Starmer, J., Williams, R.L., Jr., Calabrese, J.M., Mieczkowski, P., Yee, D., and Magnuson, T. (2014). Evidence for local regulatory control of escape from imprinted X chromosome inactivation. *Genetics* 197, 715-723. 10.1534/genetics.114.162800.
9. Tukiainen, T., Villani, A.C., Yen, A., Rivas, M.A., Marshall, J.L., Satija, R., Aguirre, M., Gauthier, L., Fleharty, M., Kirby, A., et al. (2017). Landscape of X chromosome inactivation across human tissues. *Nature* 550, 244-248. 10.1038/nature24265.
10. Garieri, M., Stamoulis, G., Blanc, X., Falconnet, E., Ribaux, P., Borel, C., Santoni, F., and Antonarakis, S.E. (2018). Extensive cellular heterogeneity of X inactivation revealed by single-cell allele-specific expression in human fibroblasts. *Proc Natl Acad Sci U S A* 115, 13015-13020. 10.1073/pnas.1806811115.
11. Zhang, X., Hong, D., Ma, S., Ward, T., Ho, M., Pattni, R., Duren, Z., Stankov, A., Bade Shrestha, S., Hallmayer, J., et al. (2020). Integrated functional genomic analyses of Klinefelter and Turner syndromes reveal global network effects of altered X chromosome dosage. *Proc Natl Acad Sci U S A* 117, 4864-4873. 10.1073/pnas.1910003117.
12. Zito, A., Roberts, A.L., Visconti, A., Rossi, N., Andres-Ejarque, R., Nardone, S., Moustafa, J.E.S., Falchi, M., and Small, K.S. (2021). Escape from X-inactivation in twins exhibits intra- and inter-individual variability across tissues and is heritable. *bioRxiv*, 2021.2010.2015.463586. 10.1101/2021.10.15.463586.
13. Werner, J.M., Ballouz, S., Hover, J., and Gillis, J. (2022). Variability of cross-tissue X-chromosome inactivation characterizes timing of human embryonic lineage specification events. *Dev Cell* 57, 1995-2008 e1995. 10.1016/j.devcel.2022.07.007.
14. Audano, P.A., Sulovari, A., Graves-Lindsay, T.A., Cantsilieris, S., Sorensen, M., Welch, A.E., Dougherty, M.L., Nelson, B.J., Shah, A., Dutcher, S.K., et al. (2019).

- Characterizing the Major Structural Variant Alleles of the Human Genome. *Cell* 176, 663-675 e619. 10.1016/j.cell.2018.12.019.
15. Chiang, C., Scott, A.J., Davis, J.R., Tsang, E.K., Li, X., Kim, Y., Hadzic, T., Damani, F.N., Ganel, L., Consortium, G.T., et al. (2017). The impact of structural variation on human gene expression. *Nat Genet* 49, 692-699. 10.1038/ng.3834.
  16. Reese, F., and Mortazavi, A. (2021). Swan: a library for the analysis and visualization of long-read transcriptomes. *Bioinformatics* 37, 1322-1323. 10.1093/bioinformatics/btaa836.
  17. Garrido-Martin, D., Palumbo, E., Guigo, R., and Breschi, A. (2018). ggsashimi: Sashimi plot revised for browser- and annotation-independent splicing visualization. *PLoS Comput Biol* 14, e1006360. 10.1371/journal.pcbi.1006360.
  18. Beraldi, R., Meyerholz, D.K., Savinov, A., Kovacs, A.D., Weimer, J.M., Dykstra, J.A., Geraets, R.D., and Pearce, D.A. (2017). Genetic ataxia telangiectasia porcine model phenocopies the multisystemic features of the human disease. *Biochim Biophys Acta Mol Basis Dis* 1863, 2862-2870. 10.1016/j.bbadis.2017.07.020.
  19. Hounkpe, B.W., Chenou, F., de Lima, F., and De Paula, E.V. (2021). HRT Atlas v1.0 database: redefining human and mouse housekeeping genes and candidate reference transcripts by mining massive RNA-seq datasets. *Nucleic Acids Res* 49, D947-D955. 10.1093/nar/gkaa609.
  20. GTEx Consortium (2020). The GTEx Consortium atlas of genetic regulatory effects across human tissues. *Science* 369, 1318-1330. 10.1126/science.aaz1776.
  21. Vosa, U., Claringbould, A., Westra, H.J., Bonder, M.J., Deelen, P., Zeng, B., Kirsten, H., Saha, A., Kreuzhuber, R., Yazar, S., et al. (2021). Large-scale cis- and trans-eQTL analyses identify thousands of genetic loci and polygenic scores that regulate blood gene expression. *Nat Genet* 53, 1300-1310. 10.1038/s41588-021-00913-z.
  22. Levine, M.E., Lu, A.T., Quach, A., Chen, B.H., Assimes, T.L., Bandinelli, S., Hou, L., Baccarelli, A.A., Stewart, J.D., Li, Y., et al. (2018). An epigenetic biomarker of aging for lifespan and healthspan. *Aging (Albany NY)* 10, 573-591. 10.18632/aging.101414.
  23. Horvath, S. (2015). Erratum to: DNA methylation age of human tissues and cell types. *Genome Biol* 16, 96. 10.1186/s13059-015-0649-6.
  24. Szklarczyk, D., Gable, A.L., Lyon, D., Junge, A., Wyder, S., Huerta-Cepas, J., Simonovic, M., Doncheva, N.T., Morris, J.H., Bork, P., et al. (2019). STRING v11: protein-protein association networks with increased coverage, supporting functional discovery in genome-wide experimental datasets. *Nucleic Acids Res* 47, D607-D613. 10.1093/nar/gky1131.
  25. Sungnak, W., Huang, N., Becavin, C., Berg, M., Queen, R., Litvinukova, M., Talavera-Lopez, C., Maatz, H., Reichart, D., Sampaziotis, F., et al. (2020). SARS-CoV-2 entry factors are highly expressed in nasal epithelial cells together with innate immune genes. *Nat Med* 26, 681-687. 10.1038/s41591-020-0868-6.
