# Supplementary material
Source: PubMed Central journal article supplement (PMC10074325)
Supplement: NIHMS1885972-supplement-2.pdf [file NIHMS1885972-supplement-2.pdf]

**Document S2: Data S36-S38**

|               | Affiliation |          |                  |         |
|---------------|-------------|----------|------------------|---------|
| Laboratory    | ENCODE 3    | ENCODE 4 | GTE <sub>x</sub> | GENCODE |
| Gerstein      | X           | X        |                  | X       |
| Gingeras      | X           |          |                  |         |
| Bernstein     | X           | X        |                  |         |
| Guigó         | X           | X        | X                | X       |
| Schatz        |             |          |                  |         |
| Milosavljevic |             |          |                  |         |
| Choudhary     |             |          |                  | X       |
| Snyder        | X           | X        | X                |         |
| Myers         | X           | X        |                  |         |
| Gillis        |             |          |                  |         |
| Ren           | X           | X        |                  |         |
| Mortazavi     | X           | X        |                  |         |
| Wold          | X           | X        |                  |         |
| Dobin         |             | X        |                  |         |
| Levine        |             |          |                  |         |
| Weng          | X           | X        |                  |         |
| Noble         | X           | X        |                  |         |
| Mendenhall    | X           | X        |                  |         |
| Cherry        | X           | X        |                  |         |
| Ardlie        |             |          | X                |         |

**Data S36** Affiliations of laboratories contributing to the EN-TE<sub>x</sub> resource.

| Laboratory    | Lab author affiliations                                                                                                                                                                                                                                                                                                                                                                                                                                                 |
|---------------|-------------------------------------------------------------------------------------------------------------------------------------------------------------------------------------------------------------------------------------------------------------------------------------------------------------------------------------------------------------------------------------------------------------------------------------------------------------------------|
| Gerstein      | Joel Rozowsky, Yucheng T Yang, Gamze GURSOY, Timur Galeev, Beatrice Borsari, Kun Xiong, Jinrui Xu, Jiahao Gao, Ana Berthel, Zhanlin Chen, Fabio Navarro, Jason Liu, Maxwell S Sun, Justin Chang, Christopher JF Cameron, Gabriel Conte Cortez Martins, Daniel Farid, Mengting Gu, Yunzhe Jiang, Xiangmeng Kong, Shantao Li, Bian Li, Tianxiao Li, Ran Meng, Ioann Popov, Leonidas Salichos, Xu Shi, Zhen Tan, Jun Wang, Min Xu, Chengfei Yan, Jing Zhang, Mark Gerstein |
| Gingeras      | Jorg Drenkow, Cassidy Danyko, Carrie A Davis, Alexandra Scavelli, Lei Hoon See, Christopher Zaleski, Alexander Dobin, Thomas R Gingeras                                                                                                                                                                                                                                                                                                                                 |
| Bernstein     | Charles B Epstein, Noam Shores, Elizabeth Gaskell, Samridhi Banskota, Guillermo Barreto Corona, Nina P Farrell, Vivian Hecht, Robbyn Issner, Nicholas Nelson, Chad Nusbaum, Joe Raymond, Bradley E Bernstein                                                                                                                                                                                                                                                            |
| Guigó         | Beatrice Borsari, Anna Vlasova, Roderic Guigó                                                                                                                                                                                                                                                                                                                                                                                                                           |
| Schatz        | Sergey Aganezov, Melanie Kirsche, Ruibang Luo, Srividya Ramakrishnan, Fritz J Sedlazeck, Rachel M Sherman, Michael C Schatz                                                                                                                                                                                                                                                                                                                                             |
| Milosavljevic | Keyang Yu, Yoel Gofin, Xiqi Li, Aleksandar Milosavljevic                                                                                                                                                                                                                                                                                                                                                                                                                |
| Choudhary     | James Wright, Jonathan Mudge, Lu Yu, Jyoti Choudhary                                                                                                                                                                                                                                                                                                                                                                                                                    |
| Snyder        | Jessica Adrian, Minyi Shi, Michael P Snyder                                                                                                                                                                                                                                                                                                                                                                                                                             |
| Myers         | Mark Mackiewicz, Richard M Myers                                                                                                                                                                                                                                                                                                                                                                                                                                        |
| Gillis        | Jonathan Werner, Jesse Gillis                                                                                                                                                                                                                                                                                                                                                                                                                                           |
| Ren           | Sora Chee, David U Gorkin, Yunjiang Qiu, Bing Ren                                                                                                                                                                                                                                                                                                                                                                                                                       |
| Mortazavi     | Gabriela Balderrama-Gutierrez, Ali Mortazavi                                                                                                                                                                                                                                                                                                                                                                                                                            |
| Wold          | Brian Williams, Barbara Wold                                                                                                                                                                                                                                                                                                                                                                                                                                            |
| Dobin         | Alexander Dobin                                                                                                                                                                                                                                                                                                                                                                                                                                                         |
| Levine        | Morgan E Levine                                                                                                                                                                                                                                                                                                                                                                                                                                                         |
| Weng          | Jill E Moore, Henry E Pratt, Zhiping Weng                                                                                                                                                                                                                                                                                                                                                                                                                               |
| Noble         | Jacob M Schreiber, William S Noble                                                                                                                                                                                                                                                                                                                                                                                                                                      |
| Mendenhall    | Surya B Chhetri, Eric M Mendenhall                                                                                                                                                                                                                                                                                                                                                                                                                                      |
| Cherry        | Idan Gabdank, Benjamin C Hitz, Bonita R Lam, Khine Zin Lin, Cricket Alicia Sloan, J Seth Strattan, Forrest Y Tanaka, J Michael Cherry                                                                                                                                                                                                                                                                                                                                   |
| Ardlie        | François Aguet, Kristin Ardlie                                                                                                                                                                                                                                                                                                                                                                                                                                          |

**Data S37** Laboratory affiliations of EN-TE<sub>x</sub> authors.

| <b>Overall Author Contributions</b>       |                                                                                                                                                                                                                                                                                                                                           |
|-------------------------------------------|-------------------------------------------------------------------------------------------------------------------------------------------------------------------------------------------------------------------------------------------------------------------------------------------------------------------------------------------|
| Performed data analysis                   | Joel.R., J.G., B.B., Y.T.Y., G.G., T.G., K.X., J.X., A.B., Z.C., F.N., J.L., M.S.S., J.C., C.J.F.C., G.C.C.M., D.F., M.G., Y.J., X.K., S.L., B.L., T.X.L., R.N., I.P., L.S., X.S., Z.T., Jun.W., C.Y., J.Z., A.V., S.A., M.K., R.L., S.R., F.J.S., R.M.S., K.Y., Y.G., X.L., James.W., J.M., L.Y., Jonathan.W., J.E.M., H.E.P. and J.M.S. |
| Performed experiments and data deposition | J.D., C.D., C.A.D., A.S., L.H.S., C.Z., C.B.E., N.S., E.G., S.B., G.B.C., N.P.F., V.H., R.I., N.N., C.D., Joe.R., J.A., M.S., M.M., S.C., D.U.G., Y.Q., G.B.G., B.W., S.B.C., I.G., B.C.H., B.R.L., K.Z.L., C.A.S., J.S.S. and F.Y.T.                                                                                                     |
| Supervised the project                    | K.A., J.M.C., E.M.M., W.S.N., Z.W., M.E.L., A.D., B.W., A.M., B.R., J.G., R.M.M., M.P.S., J.C., A.M., M.C.S., B.E.B., R.G., T.R.G. and M.G.                                                                                                                                                                                               |
| Drafted the manuscript                    | Joel.R., J.G., B.B., Y.T.Y., T.G., G.G., K.X., J.X., T.X.L., J.L., A.B., J.C., C.J.F.C., M.C.S., B.E.B., R.G., T.R.G. and M.G.                                                                                                                                                                                                            |
| <b>Specific Author Contributions</b>      |                                                                                                                                                                                                                                                                                                                                           |
| Exhibit                                   | Lead Contributors                                                                                                                                                                                                                                                                                                                         |
| <b>Main Figures</b>                       |                                                                                                                                                                                                                                                                                                                                           |
| Figure 1                                  | 1A: Joel Rozowsky, Jiahao Gao<br>1BC: Timur Galeev, Jiahao Gao                                                                                                                                                                                                                                                                            |
| Figure 2                                  | 2A: Jason Liu, Kun Xiong, Christopher JF Cameron, Yunzhe Jiang<br>2B: Jason Liu, Kun Xiong, Yunzhe Jiang, Keyang Yu<br>2C: Jason Liu, Kun Xiong, Gamze Gursoy<br>2D: Timur Galeev, Jason Liu, Kun Xiong<br>2EF: Jason Liu, Kun Xiong                                                                                                      |
| Figure 3                                  | 3A: Yucheng T. Yang, Jiahao Gao, Jason Liu<br>3B: Yucheng T. Yang, Jason Liu<br>3C: Yucheng T. Yang, Jason Liu, Yunzhe Jiang<br>3D: Yucheng T. Yang, Timur Galeev, Jason Liu<br>3E: Jason Liu<br>3F: Timur Galeev, Jason Liu                                                                                                              |
| Figure 4                                  | 4A: Jason Liu<br>4B: Yucheng T. Yang, Jason Liu<br>4C: Yucheng T. Yang, Jason Liu, Ana Berthel<br>4D: Timur Galeev, Jason Liu                                                                                                                                                                                                             |
| Figure 5                                  | 5A-G: Beatrice Borsari                                                                                                                                                                                                                                                                                                                    |
| Figure 6                                  | 6AB: Jiahao Gao<br>6C: Jiahao Gao, Jun Wang                                                                                                                                                                                                                                                                                               |
| Figure 7                                  | 7A-F: Tianxiao Li                                                                                                                                                                                                                                                                                                                         |
| <b>Supplemental Figures</b>               |                                                                                                                                                                                                                                                                                                                                           |
| Figure S1                                 | S1A: Joel Rozowsky, Jiahao Gao<br>S1B: Michael Schatz                                                                                                                                                                                                                                                                                     |

|                             |                                                                                                                                                                                            |
|-----------------------------|--------------------------------------------------------------------------------------------------------------------------------------------------------------------------------------------|
|                             | S1C: Jiahao Gao<br>S1D: Jiahao Gao, Kun Xiong                                                                                                                                              |
| Figure S2                   | S2A: Timur Galeev, Beatrice Borsari<br>S2B: Yucheng T. Yang, Beatrice Borsari<br>S2CD: Jinrui Xu, Jiahao Gao                                                                               |
| Figure S3                   | S3A: Jiahao Gao<br>S3B-D: Timur Galeev, Jiahao Gao<br>S3EF: Timur Galeev                                                                                                                   |
| Figure S4                   | S4A: Timur Galeev, Gamze Gursoy, Kun Xiong<br>S4B: Beatrice Borsari, Kun Xiong<br>S4C: Kun Xiong                                                                                           |
| Figure S5                   | S5A: Yucheng T. Yang, Jason Liu<br>S5B: Yucheng T. Yang<br>S5C: Timur Galeev, Kun Xiong<br>S5D: Kun Xiong                                                                                  |
| Figure S6                   | S6A-E: Beatrice Borsari                                                                                                                                                                    |
| Figure S7                   | S7A: Jiahao Gao<br>S7B: Jun Wang<br>S7C-E: Tianxiao Li                                                                                                                                     |
| <b>Document S1 Exhibits</b> |                                                                                                                                                                                            |
| Data S1                     | Kun Xiong, Jiahao Gao                                                                                                                                                                      |
| Data S2                     | S2A-C: Michael Schatz<br>S2D: Kun Xiong, Joel Rozowsky<br>S2EF: Michael Schatz<br>S2G: Timur Galeev, Jiahao Gao<br>S2H: Timur Galeev<br>S2I: Yucheng T. Yang, Jiahao Gao, Beatrice Borsari |
| Data S3                     | S3A-E: Gamze Gursoy<br>S3FG: Christopher JF Cameron                                                                                                                                        |
| Data S4                     | S4A-D: James Wright, Kun Xiong                                                                                                                                                             |
| Data S5                     | S5AB: Leonidas Salichos<br>S5C: Gamze Gursoy<br>S5D-J: Beatrice Borsari<br>S5K-N: Yuncheng T. Yang                                                                                         |
| Data S6                     | S6A-L: Jinrui Xu<br>S6M: Jiahao Gao, Jinrui Xu, Fabio Navarro<br>S6NO: Jinrui Xu                                                                                                           |
| Data S7                     | S7A: Timur Galeev<br>S7BC: Kun Xiong                                                                                                                                                       |
| Data S8                     | S8AB: Timur Galeev<br>S8C: Kun Xiong, Timur Galeev                                                                                                                                         |
| Data S9                     | S9A: Keyang Yu<br>S9B: Keyang Yu, Timur Galeev                                                                                                                                             |
| Data S10                    | S10A-D: Gamze Gursoy                                                                                                                                                                       |
| Data S11                    | S11A: Timur Galeev<br>S11B: Jun Wang                                                                                                                                                       |
| Data S12                    | S12AB: Timur Galeev                                                                                                                                                                        |
| Data S13                    | S13A: Timur Galeev, Ana Berthel<br>S13B-E: Ana Berthel                                                                                                                                     |
| Data S14                    | S14A-D: Christopher JF Cameron<br>S14E-G: Gamze Gursoy<br>S14H: Kun Xiong                                                                                                                  |
| Data S15                    | S15A-E: Kun Xiong                                                                                                                                                                          |
| Data S16                    | S16A-E: Kun Xiong                                                                                                                                                                          |
| Data S17                    | S17A-I: Kun Xiong<br>S17J: Kun Xiong, Ran Meng<br>S17KL: Beatrice Borsari                                                                                                                  |

|                                                           |                                                                                                                                                           |
|-----------------------------------------------------------|-----------------------------------------------------------------------------------------------------------------------------------------------------------|
|                                                           | S17M: Kun Xiong, Ran Meng<br>S17NO: Kun Xiong                                                                                                             |
| Data S18                                                  | S18A-D: Kun Xiong                                                                                                                                         |
| Data S19                                                  | S19A-D: Yucheng T. Yang                                                                                                                                   |
| Data S20                                                  | S20A-C: Jun Wang<br>S20DE: Yucheng T. Yang, Yunzhe Jiang                                                                                                  |
| Data S21                                                  | Gamze Gursoy                                                                                                                                              |
| Data S22                                                  | S22A-D: Yucheng T. Yang<br>S22E: Joel Rozowsky<br>S22F: Joel Rozowsky, Timur Galeev<br>S22G: Timur Galeev<br>S22H-J: Jun Wang                             |
| Data S23                                                  | S23A-G: Jason Liu                                                                                                                                         |
| Data S24                                                  | S24A-C: Yucheng T. Yang                                                                                                                                   |
| Data S25                                                  | S25A-F: Yucheng T. Yang                                                                                                                                   |
| Data S26                                                  | S26A: Timur Galeev, Kun Xiong<br>S26B: Timur Galeev<br>S26C: Timur Galeev, Tianxiao Li<br>S26DE: James Wright, Kun Xiong<br>S26F: Keyang Yu, Timur Galeev |
| Data S27                                                  | S27AB: Beatrice Borsari                                                                                                                                   |
| Data S28                                                  | S28A-G: Beatrice Borsari                                                                                                                                  |
| Data S29                                                  | S29A-D: Beatrice Borsari                                                                                                                                  |
| Data S30                                                  | S30A-J: Jiahao Gao<br>S30K: Jun Wang                                                                                                                      |
| Data S31                                                  | S31A-F: Jun Wang                                                                                                                                          |
| Data S32                                                  | S32A-F: Tianxiao Li                                                                                                                                       |
| Data S33                                                  | S33AE: Justin Chang, Joel Rozowsky<br>S33F-H: Gamze Gursoy, Joel Rozowsky<br>S33I: Jinrui Xu, Zhiping Weng                                                |
| Data S34                                                  | S34AB: Jinrui Xu, Morgan Levine<br>S34C: Beatrice Borsari                                                                                                 |
| Data S35                                                  | S35: Jun Wang                                                                                                                                             |
| <b>Ancillary Files (extex.encodeproject.org)</b>          |                                                                                                                                                           |
| imprinted_genes_in_ENTEx_ASE.tsv                          | Timur Galeev                                                                                                                                              |
| phased_block.tar.gz                                       | Jiahao Gao                                                                                                                                                |
| fithic2_out.tar.gz                                        | Gamze Gursoy                                                                                                                                              |
| TopDomTADcalls.tar.gz                                     | Gamze Gursoy                                                                                                                                              |
| Supp_data_proteomics.xlsx                                 | James Wright, Kun Xiong                                                                                                                                   |
| table.DE.genes.tsv: Beatrice Borsari                      | Beatrice Borsari                                                                                                                                          |
| table.DE.genes.techReps.liver.tsv                         | Beatrice Borsari                                                                                                                                          |
| table.DE.genes.GM12878.tsv                                | Beatrice Borsari                                                                                                                                          |
| differentially_marked_H3K27ac_cCREs.txt                   | Yucheng T. Yang                                                                                                                                           |
| Similarity_of_functional_genomic_activities_of_cCREs.xlsx | Jinrui Xu                                                                                                                                                 |
| normalized_proteomics_RNA-seq.dat                         | James Wright, Kun Xiong                                                                                                                                   |
| sample_signal_track.tar.gz                                | Kun Xiong                                                                                                                                                 |
| AlleleSeq2_workflow_examples.tar.gz                       | Timur Galeev                                                                                                                                              |
| hetSNVs_default_AS.tsv                                    | Timur Galeev, Ana Berthel                                                                                                                                 |
| ENTEx.TissueStacked.phased.final.txt                      | Keyang Yu                                                                                                                                                 |
| hic_files.tar.gz                                          | Gamze Gursoy                                                                                                                                              |
| genes_default_AS.tsv                                      | Timur Galeev, Ana Berthel                                                                                                                                 |
| cCREs_default_AS.tsv                                      | Timur Galeev, Ana Berthel                                                                                                                                 |
| Associated_AS_Disease_Genes.xlsx                          | Max Sun, Joel Rozowsky                                                                                                                                    |
| hetSNVs_pooled_AS.tsv                                     | Timur Galeev, Ana Berthel                                                                                                                                 |
| ENTEx.TissueAggregated.final.txt                          | Keyang Yu                                                                                                                                                 |
| pgenome_NA12878.tar.gz                                    | Timur Galeev                                                                                                                                              |

|                                                        |                                                          |
|--------------------------------------------------------|----------------------------------------------------------|
| pgenome_STL-002.tar.gz                                 | Timur Galeev                                             |
| pgenome_STL-003.tar.gz                                 | Timur Galeev                                             |
| hetSNVs_high-confidence_AS.tsv                         | Timur Galeev, Ana Berthel                                |
| hetSNVs_high-power_AS.tsv                              | Ana Berthel                                              |
| Supp_Data SVs associated with eQTL.xlsx                | Kun Xiong                                                |
| cCRE_histoneSignals_qnorm.tar.gz                       | Jinrui Xu                                                |
| cCRE_decoration.matrix                                 | Yucheng T. Yang                                          |
| active.combined_set.txt.zip                            | Yucheng T. Yang                                          |
| bivalent.combined_set.txt.zip                          | Yucheng T. Yang                                          |
| repressed.combined_set.txt.zip                         | Yucheng T. Yang                                          |
| Repressive_ccre_dnamethy_repressiveHM.zip              | Yucheng T. Yang, Yunzhe Jiang                            |
| Repressive_cCRE_DNAMethy_repressiveHM_summary.csv      | Yucheng T. Yang, Yunzhe Jiang                            |
| cCRE_DNAme_subset.tsv.zip                              | Yunzhe Jiang, Jason Liu                                  |
| stringent.regions.MF.hg38.bed                          | Jason Liu                                                |
| ENTEx_fully_repressed_regions_independent_of_cCREs.bed | Jun Wang                                                 |
| Tissue_specificity.zip                                 | Yucheng T. Yang                                          |
| QTL_enrichment.zip                                     | Yucheng T. Yang                                          |
| GWAS_enrichment.zip                                    | Yucheng T. Yang                                          |
| Supp_Data_Compatibility.xlsx                           | Kun Xiong                                                |
| AS_ratios_and_eQTL_effect.tsv                          | Timur Galeev, Tianxiao Li                                |
| R6_RData.objects                                       | Beatrice Borsari                                         |
| R6_RData.4hm.objects                                   | Beatrice Borsari                                         |
| perTissue.likely.eQTLs.tsv                             | Beatrice Borsari                                         |
| predictions.blood.eQTLs.tar.gz                         | Beatrice Borsari                                         |
| motif_ranking.tsv                                      | Jiahao Gao                                               |
| SNPs_motif_cCRE.txt.gz                                 | Jiahao Gao                                               |
| ASB-predictions-on-GTEEx-cohort.tsv.zip                | Jun Wang                                                 |
| ENTEx.Explorer.cCRE.Combined.zip                       | Justin Chang, Joel Rozowsky                              |
| ENTEx.Explorer.Expression.Combined.zip                 | Justin Chang, Joel Rozowsky                              |
| ENTEx.Proteomics.cCRE.Combined.zip                     | Justin Chang, Joel Rozowsky                              |
| <b>Software (extex.encodeproject.org)</b>              |                                                          |
| AlleleSeq2                                             | Timur Galeev                                             |
| transferQTL                                            | Beatrice Borsari                                         |
| Chromosome Painter                                     | Gabriel Conte Cortez Martins, Daniel Farid, Gamze Gursoy |
| EN-TEEx Data Explorer                                  | Justin Chang, Joel Rozowsky                              |
| Transformer model                                      | Tianxiao Li                                              |

**Data S38** Overall author contributions and lead contributors to exhibits and supplementary material.
