# Supplementary material
Source: PubMed Central journal article supplement (PMC10074325)

### A Differential Gene Expression

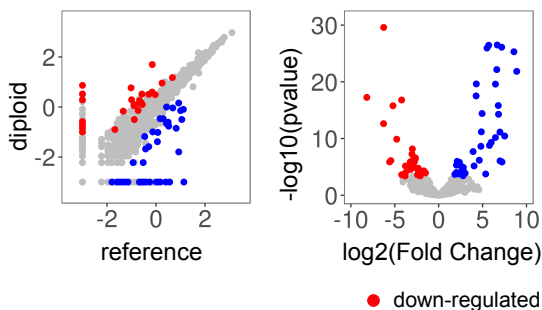

### B Differential cCRE Activity

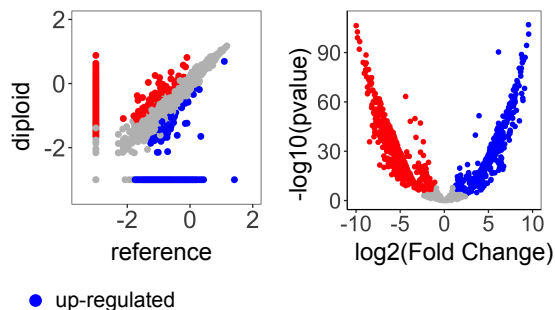

### C Variation of cCRE Activity Between Tissues, Individuals & Assays

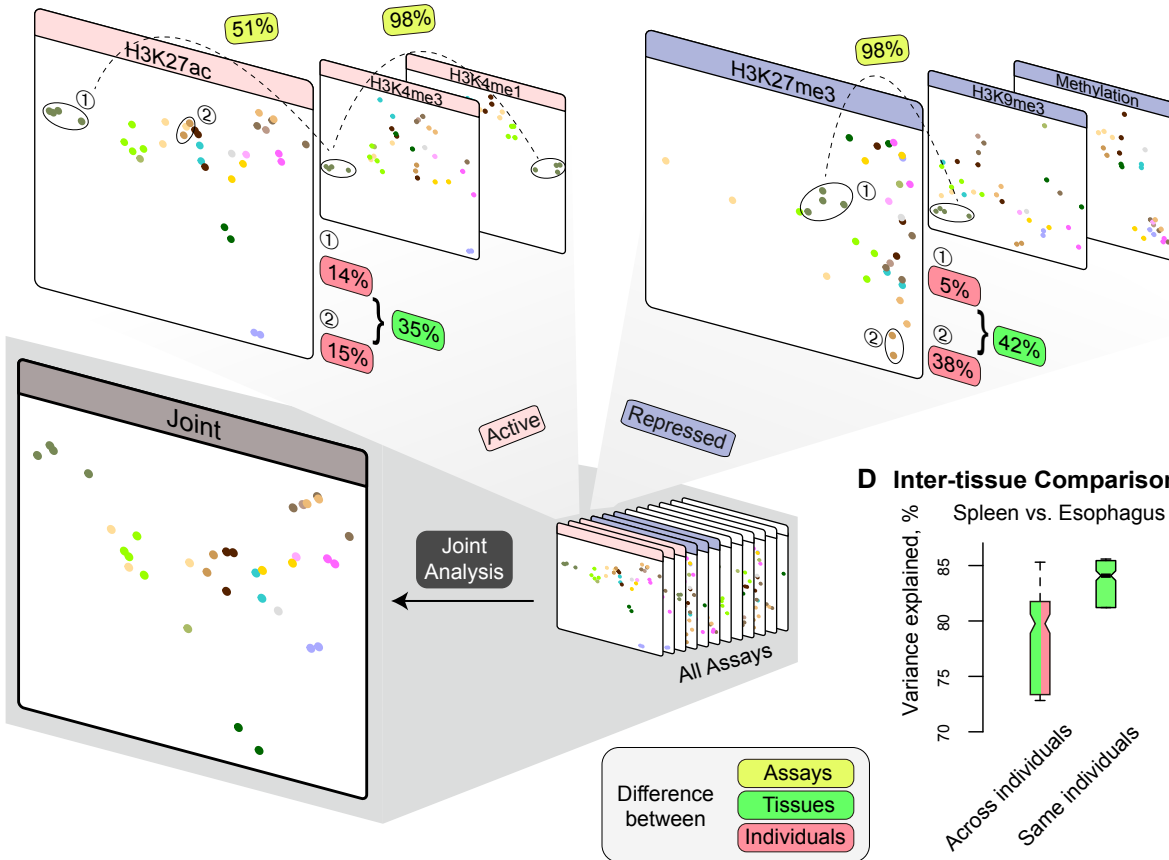

### D Inter-tissue Comparison

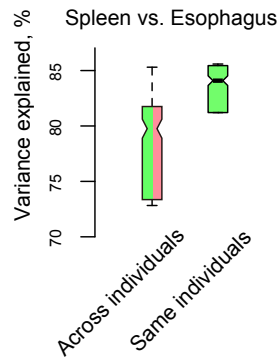

Supplement: NIHMS1885972-supplement-4.pdf [file NIHMS1885972-supplement-4.pdf]
