# Supplementary material
Source: PubMed Central journal article supplement (PMC10074325)

### A AS event calling

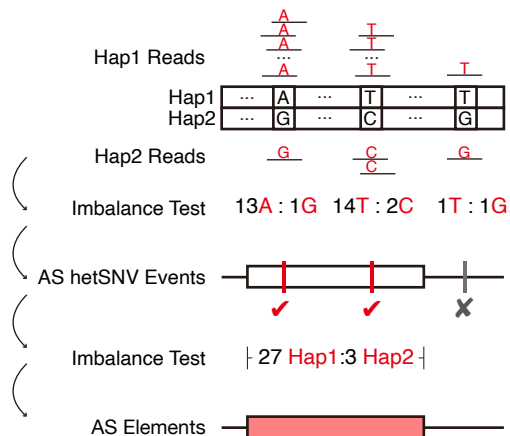

### B Distribution of number of AS events

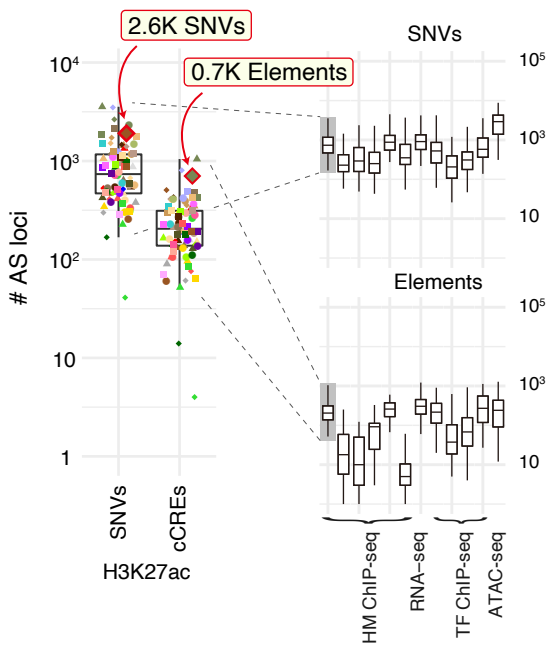

### C Types of aggregation

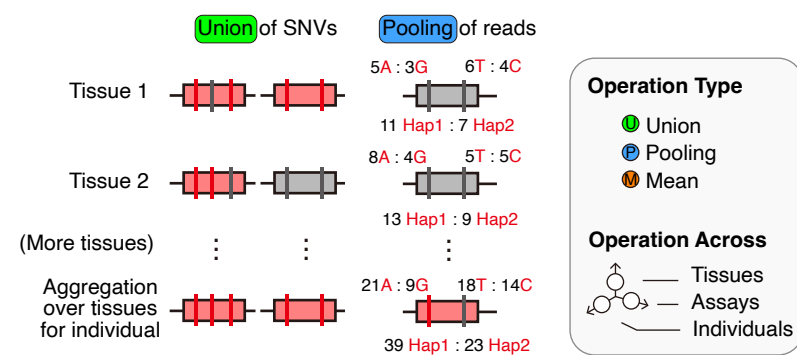

### D Catalog summary

Counts of AS SNVs or Elements(E) ( $\times 10^3$ )

| Example                                                       | Aggregated    |
|---------------------------------------------------------------|---------------|
| Spleen Ind #1 H3K27ac<br>2.6<br>0.7(E)                        | 0.8<br>0.2(E) |
| All Spleen H3K27ac<br>9.3<br>2.5(E)                           | 1.8<br>0.4(E) |
| All Ind #1 H3K27ac<br>11<br>27                                | 5.5<br>27     |
| All All H3K27ac<br>30<br>79                                   | 19<br>43      |
| <b>AS catalog</b><br>4 Individuals<br>12 Assays<br>31 Tissues | 232<br>516    |

### E AS SNVs across assays

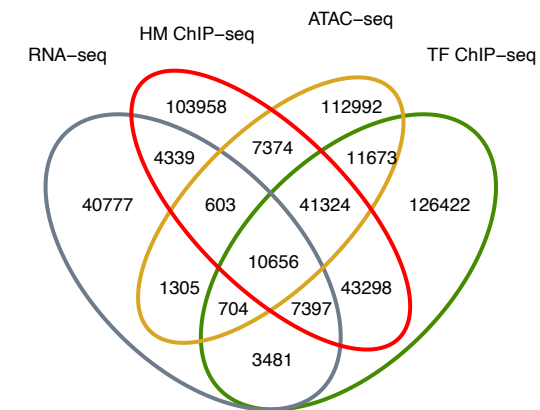

### F AS elements across samples

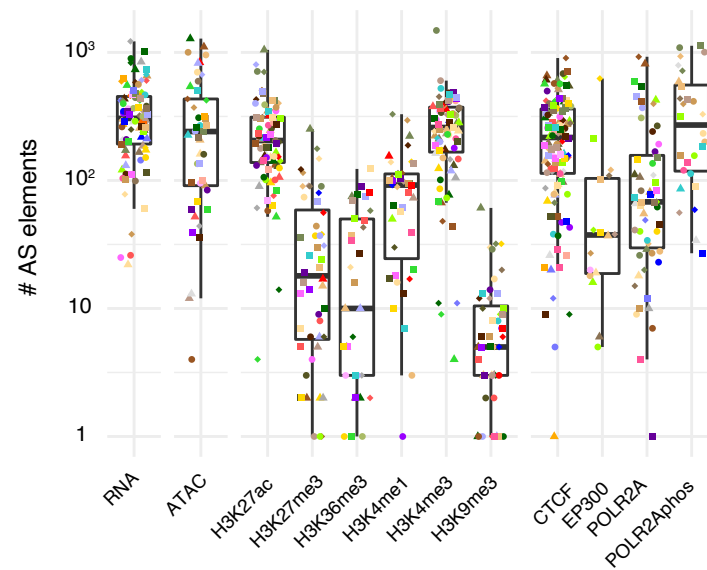

Supplement: NIHMS1885972-supplement-5.pdf [file NIHMS1885972-supplement-5.pdf]
