# Supplementary material
Source: PubMed Central journal article supplement (PMC10074325)

## A Data overview

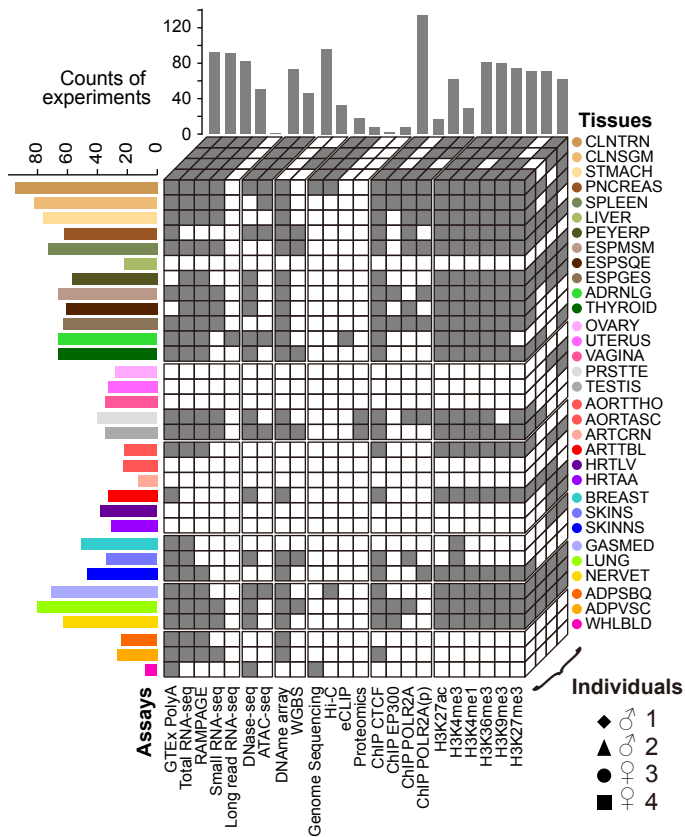

## C Mapping reads to haplotypes

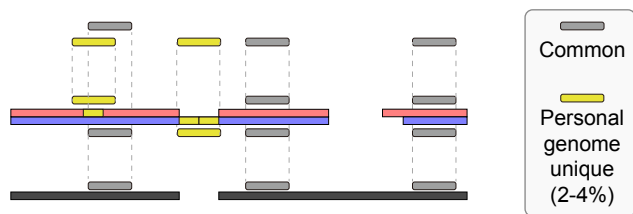

## B Personal genome workflow

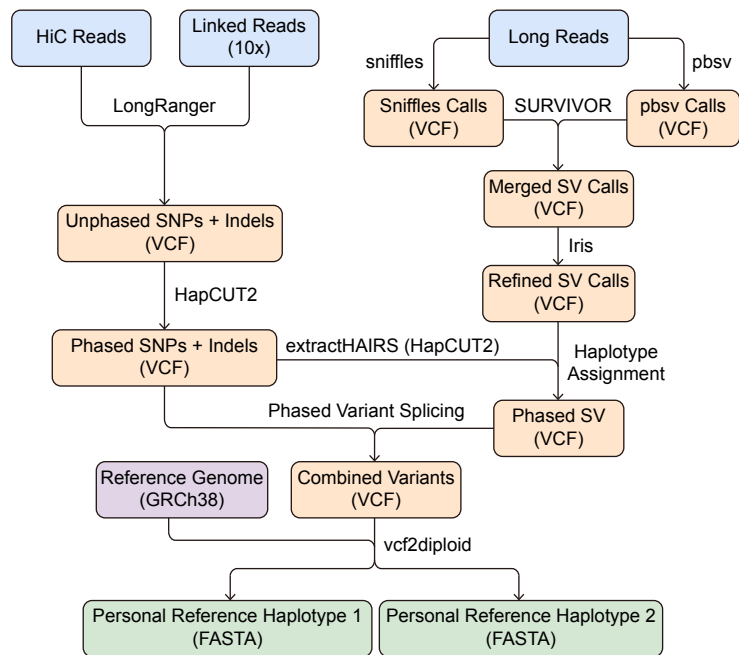

## D Number of SVs

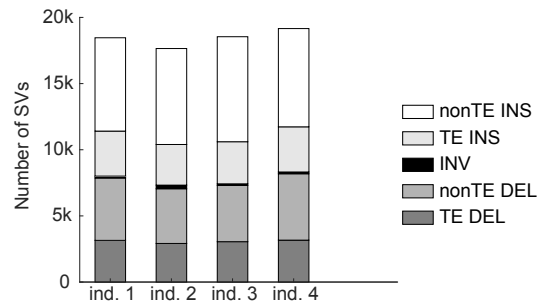

Supplement: NIHMS1885972-supplement-3.pdf [file NIHMS1885972-supplement-3.pdf]

**A**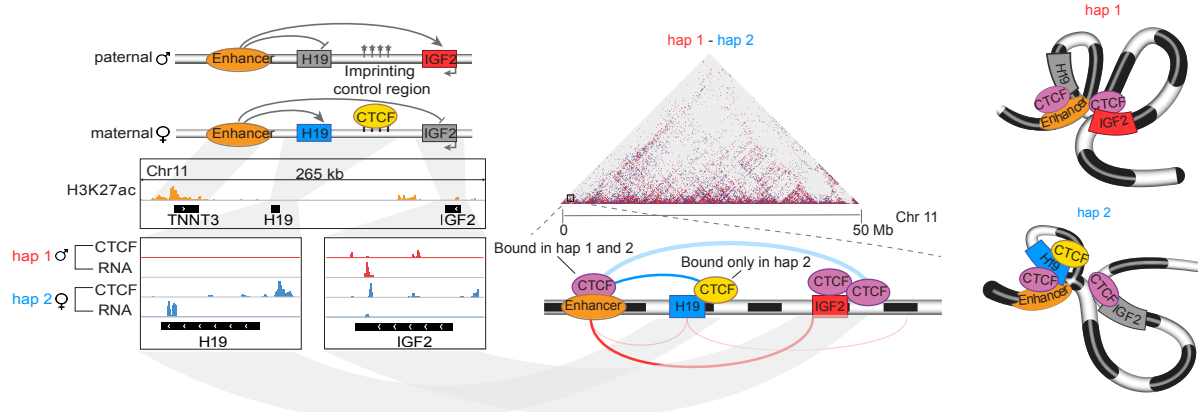**B**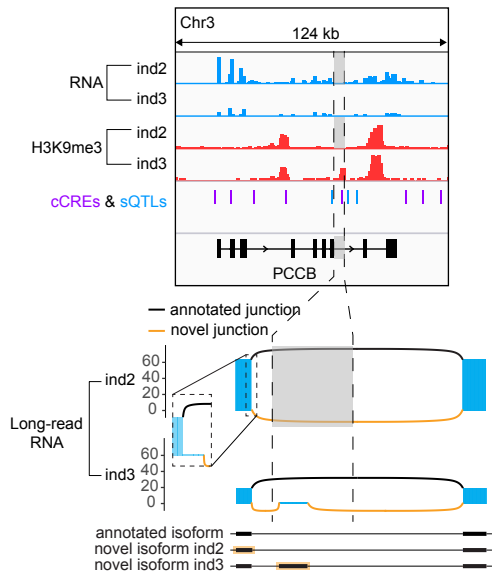**C**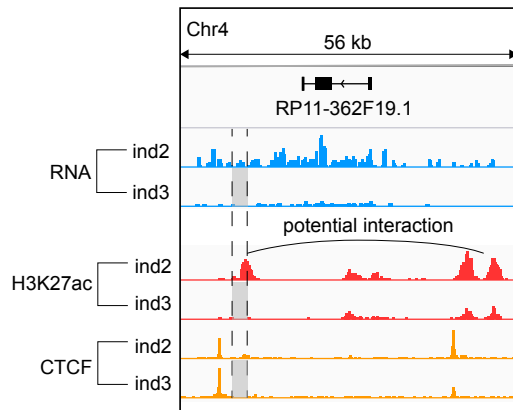

Supplement: NIHMS1885972-supplement-6.pdf [file NIHMS1885972-supplement-6.pdf]

**A**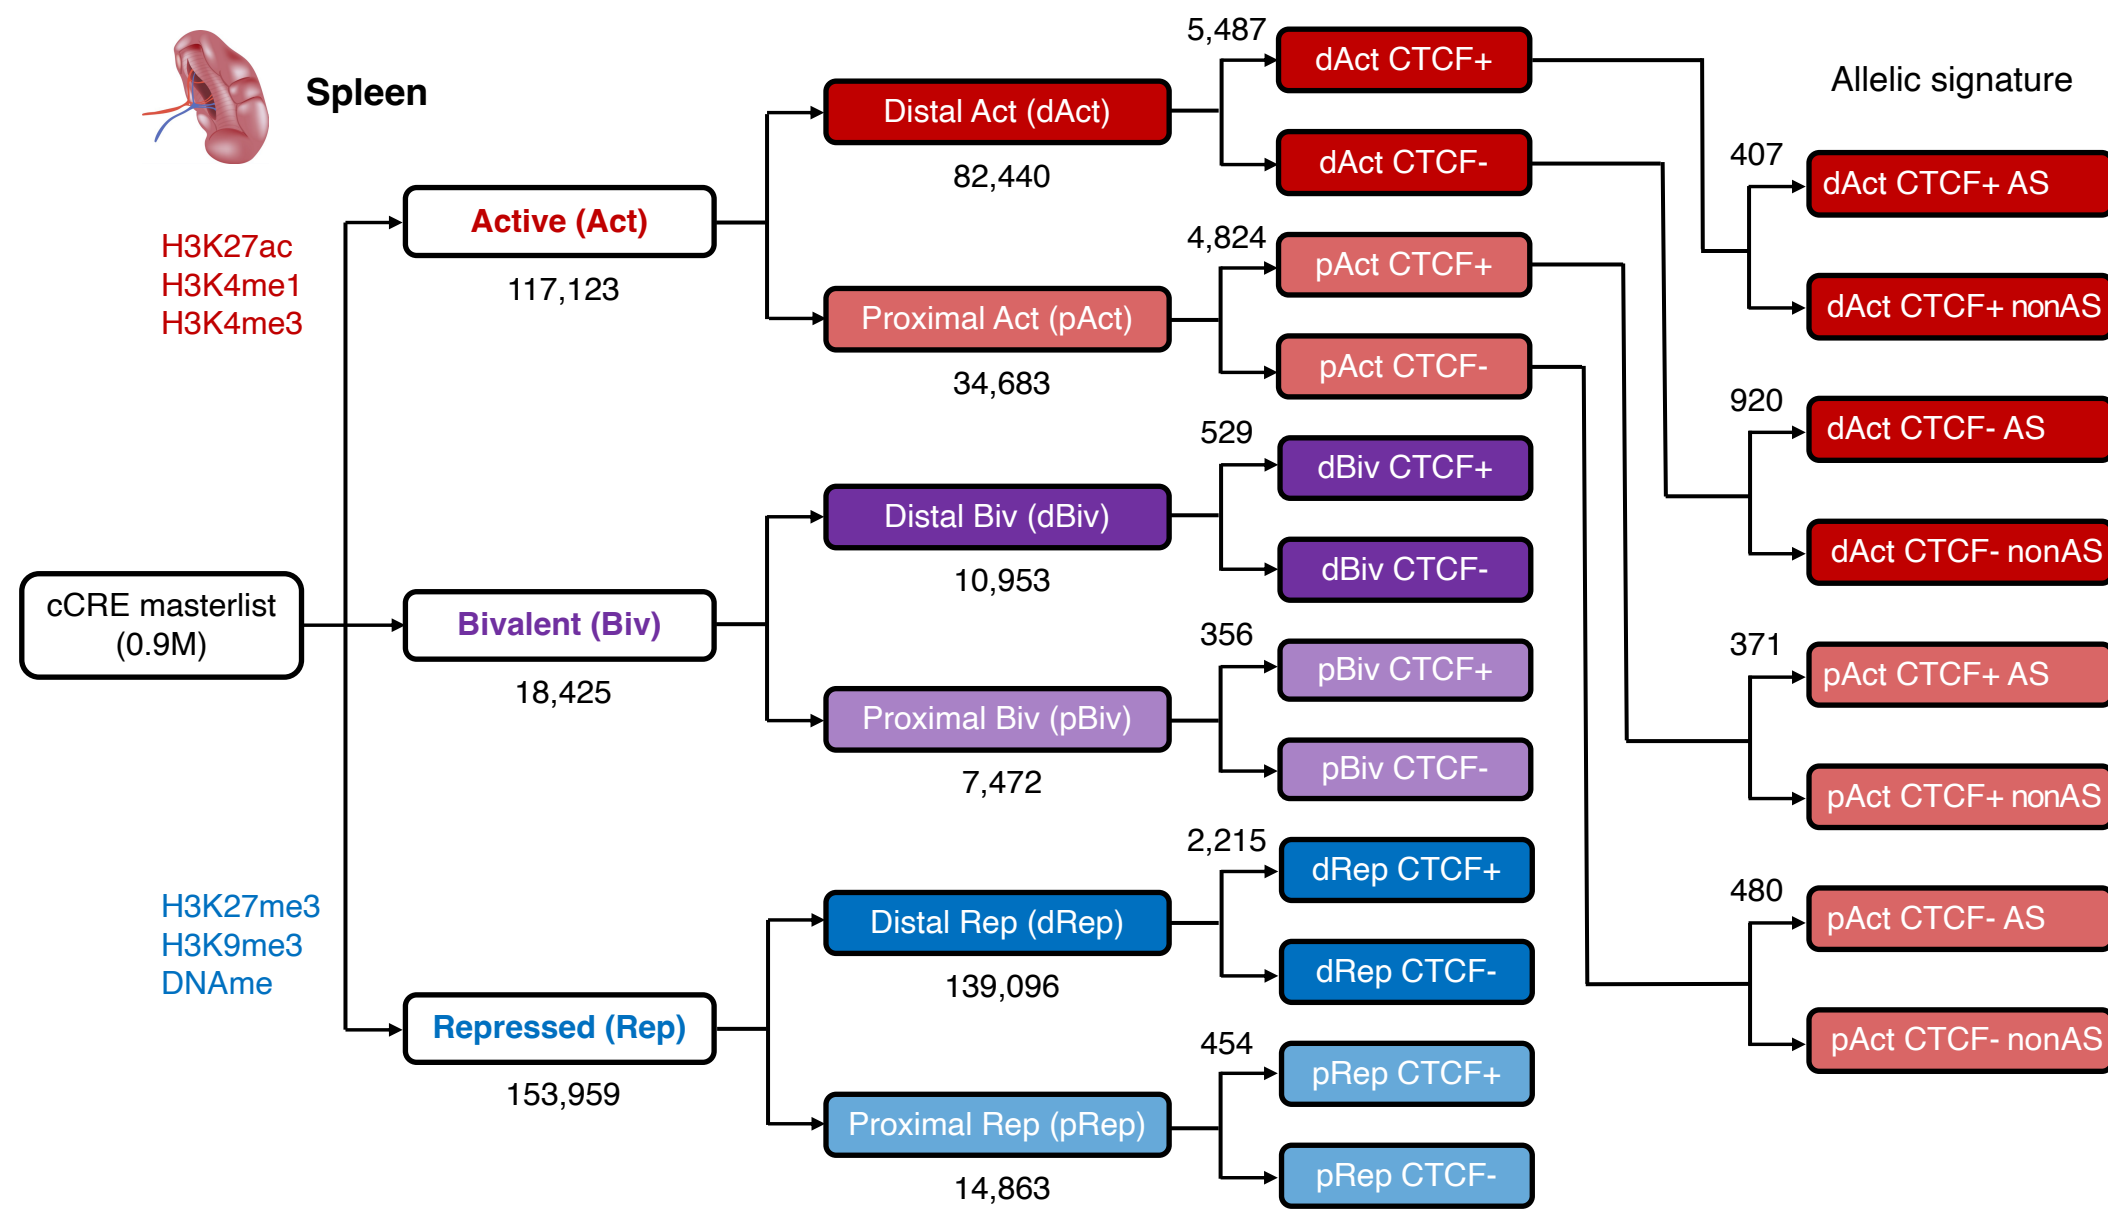**B**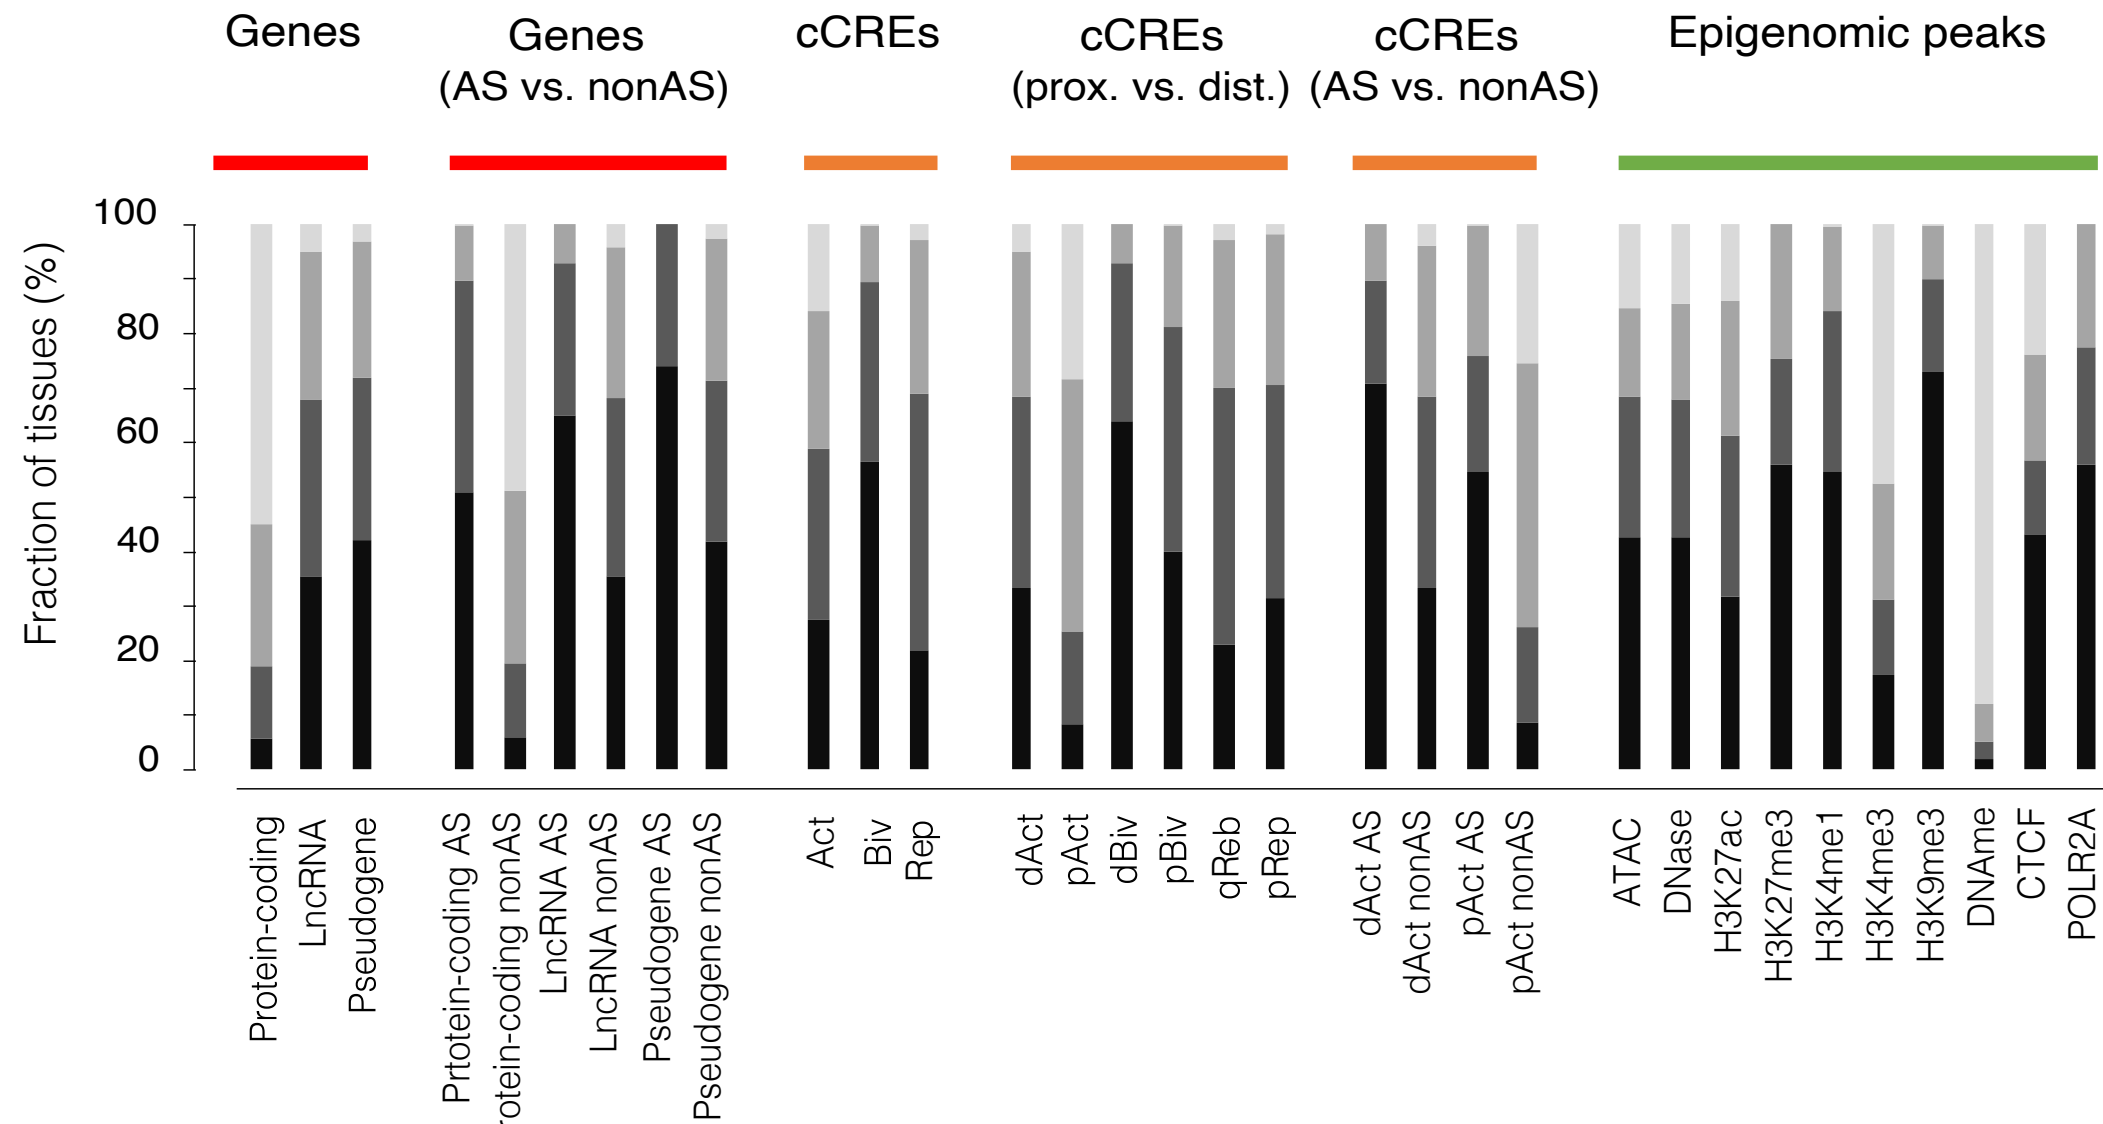**C**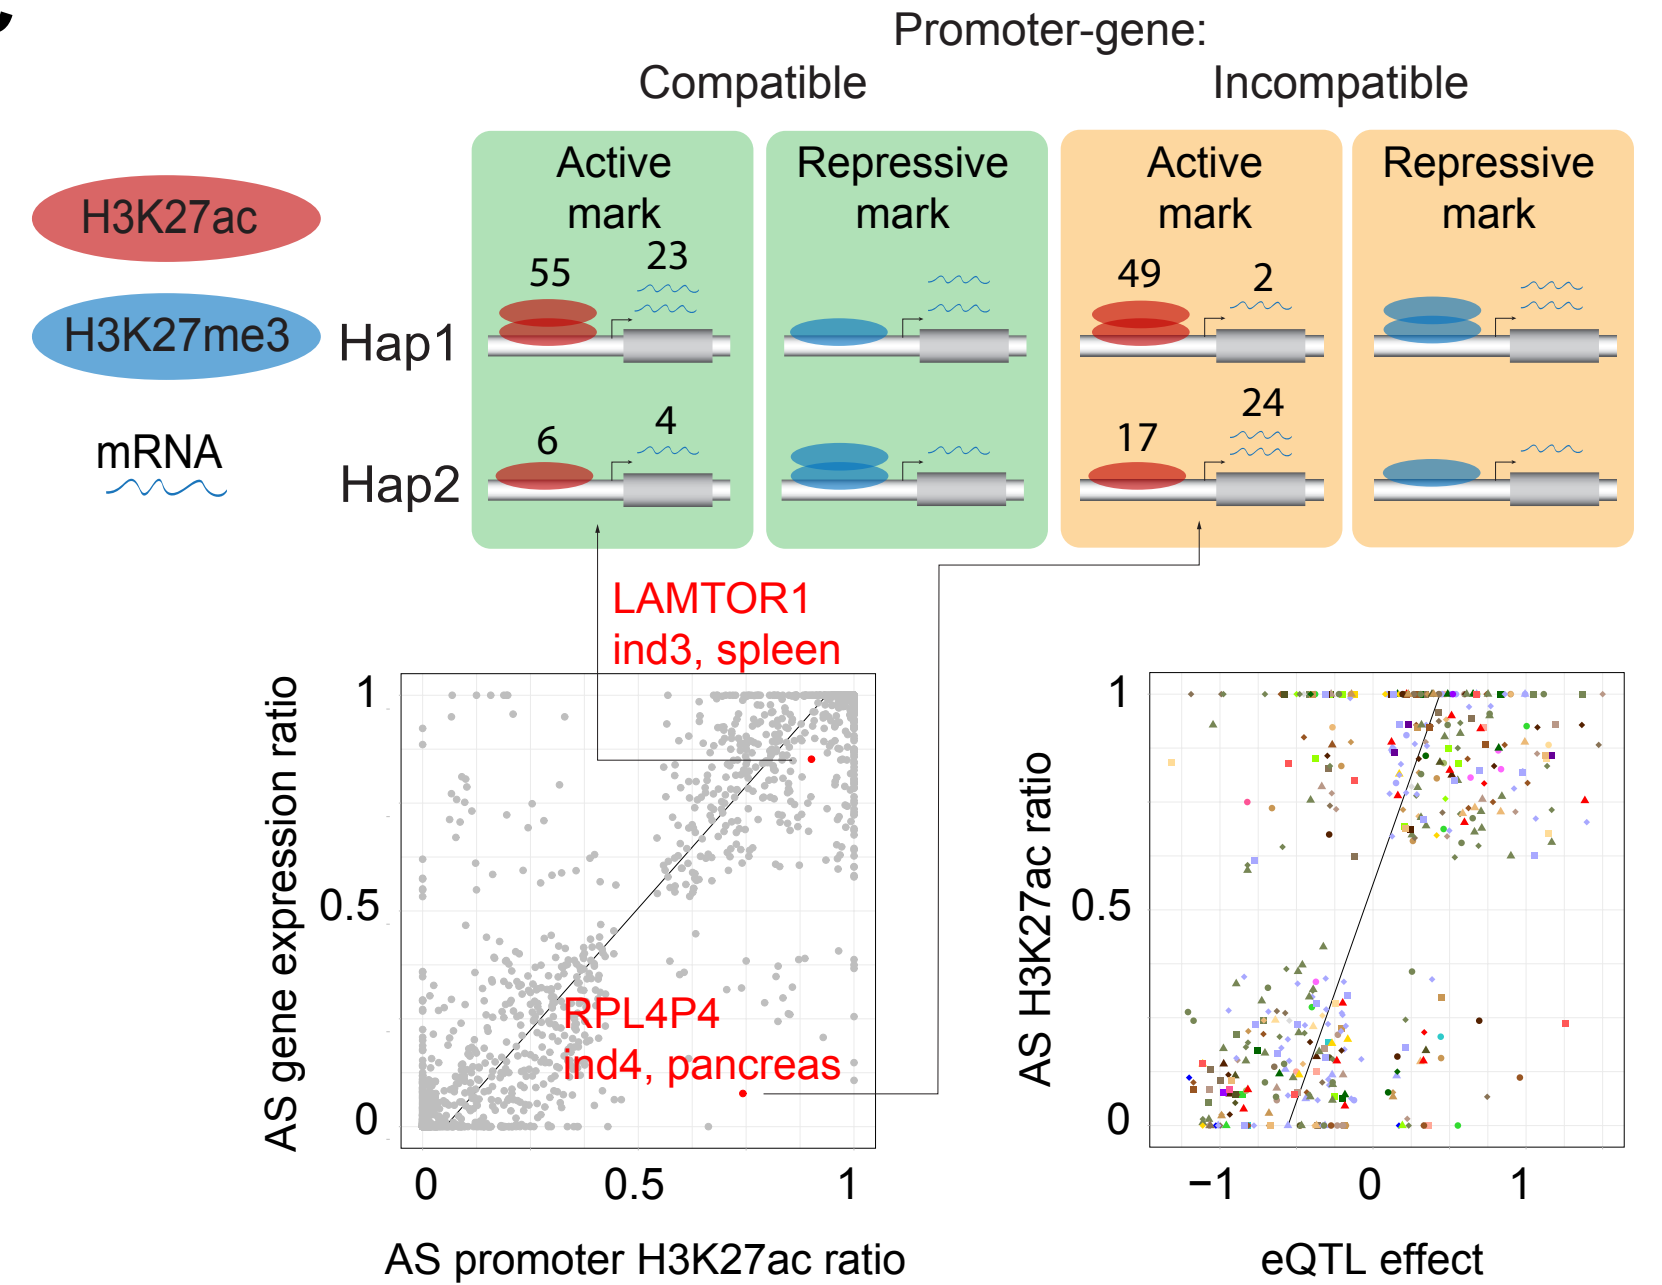**D**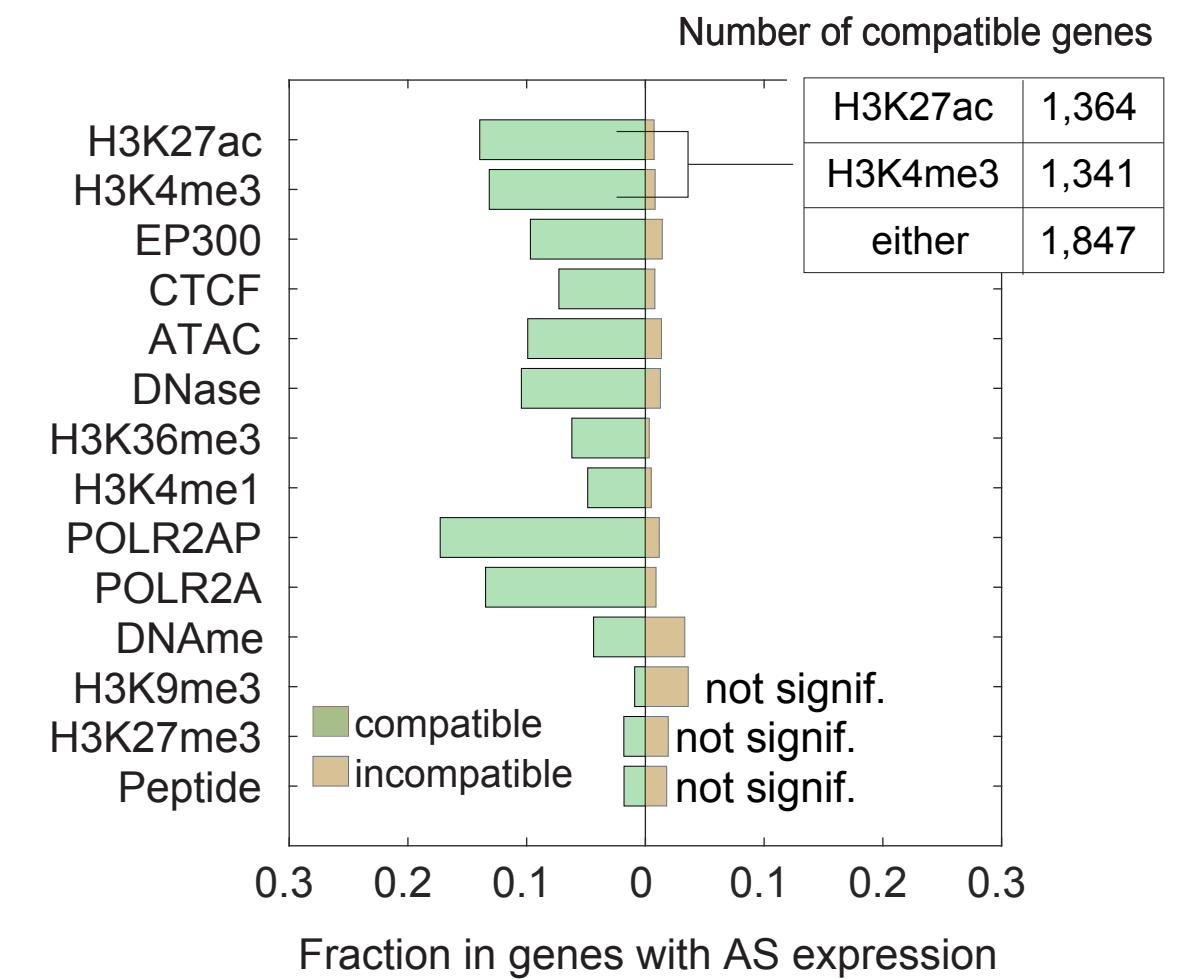

Supplement: NIHMS1885972-supplement-7.pdf [file NIHMS1885972-supplement-7.pdf]

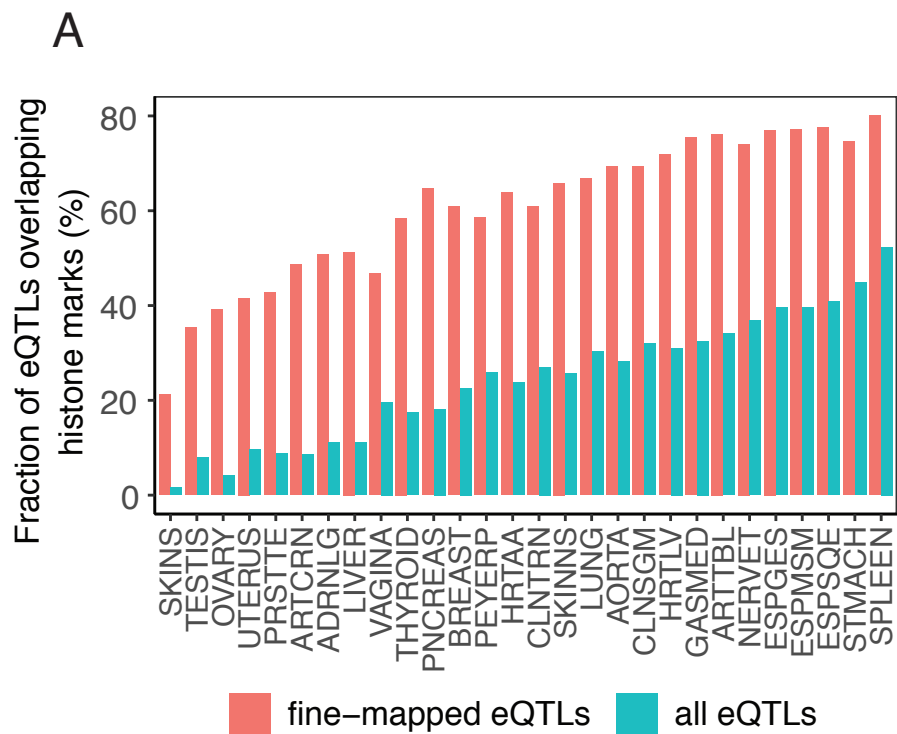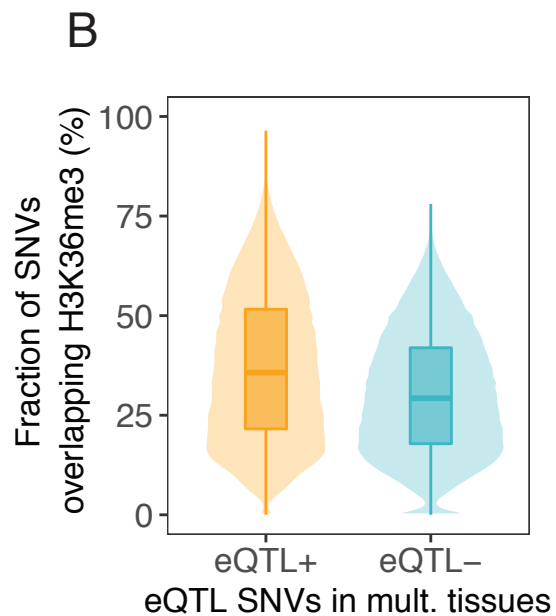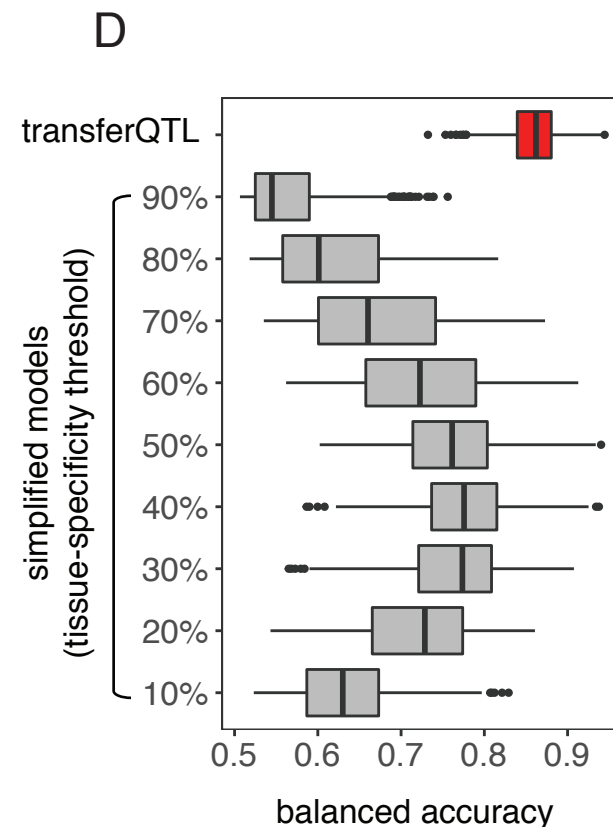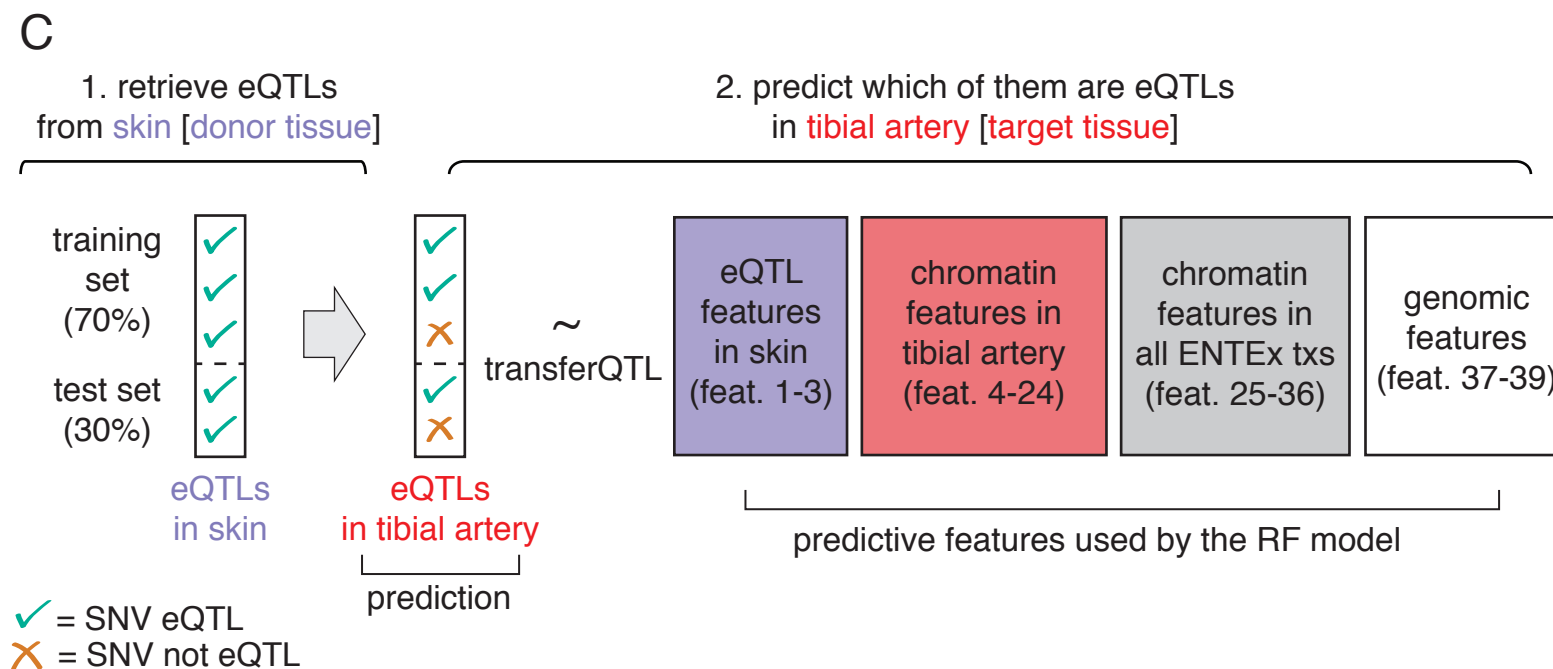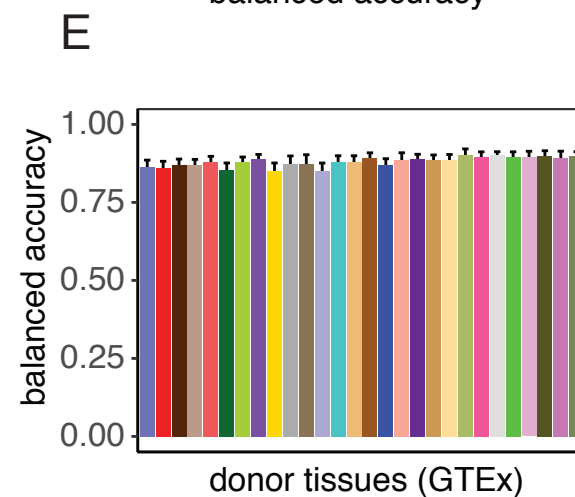

Supplement: NIHMS1885972-supplement-8.pdf [file NIHMS1885972-supplement-8.pdf]

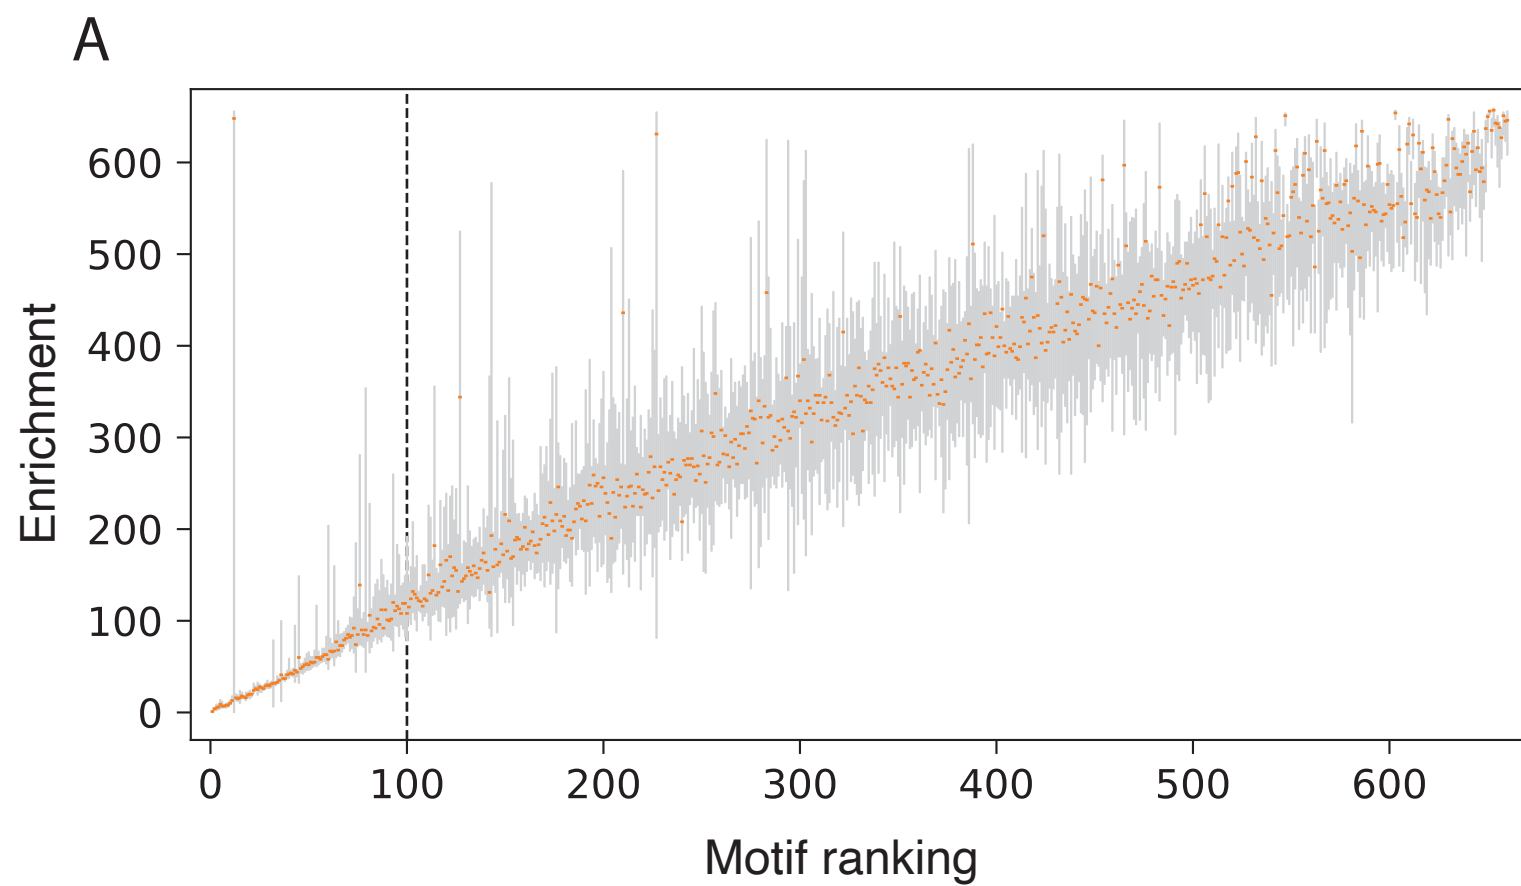

**B**

|                   | H3K27ac     |                 |
|-------------------|-------------|-----------------|
|                   | AS promoter | Non-AS promoter |
| AS expression     | 1,402       | 8,137           |
| Non-AS expression | 3,855       | 225,461         |

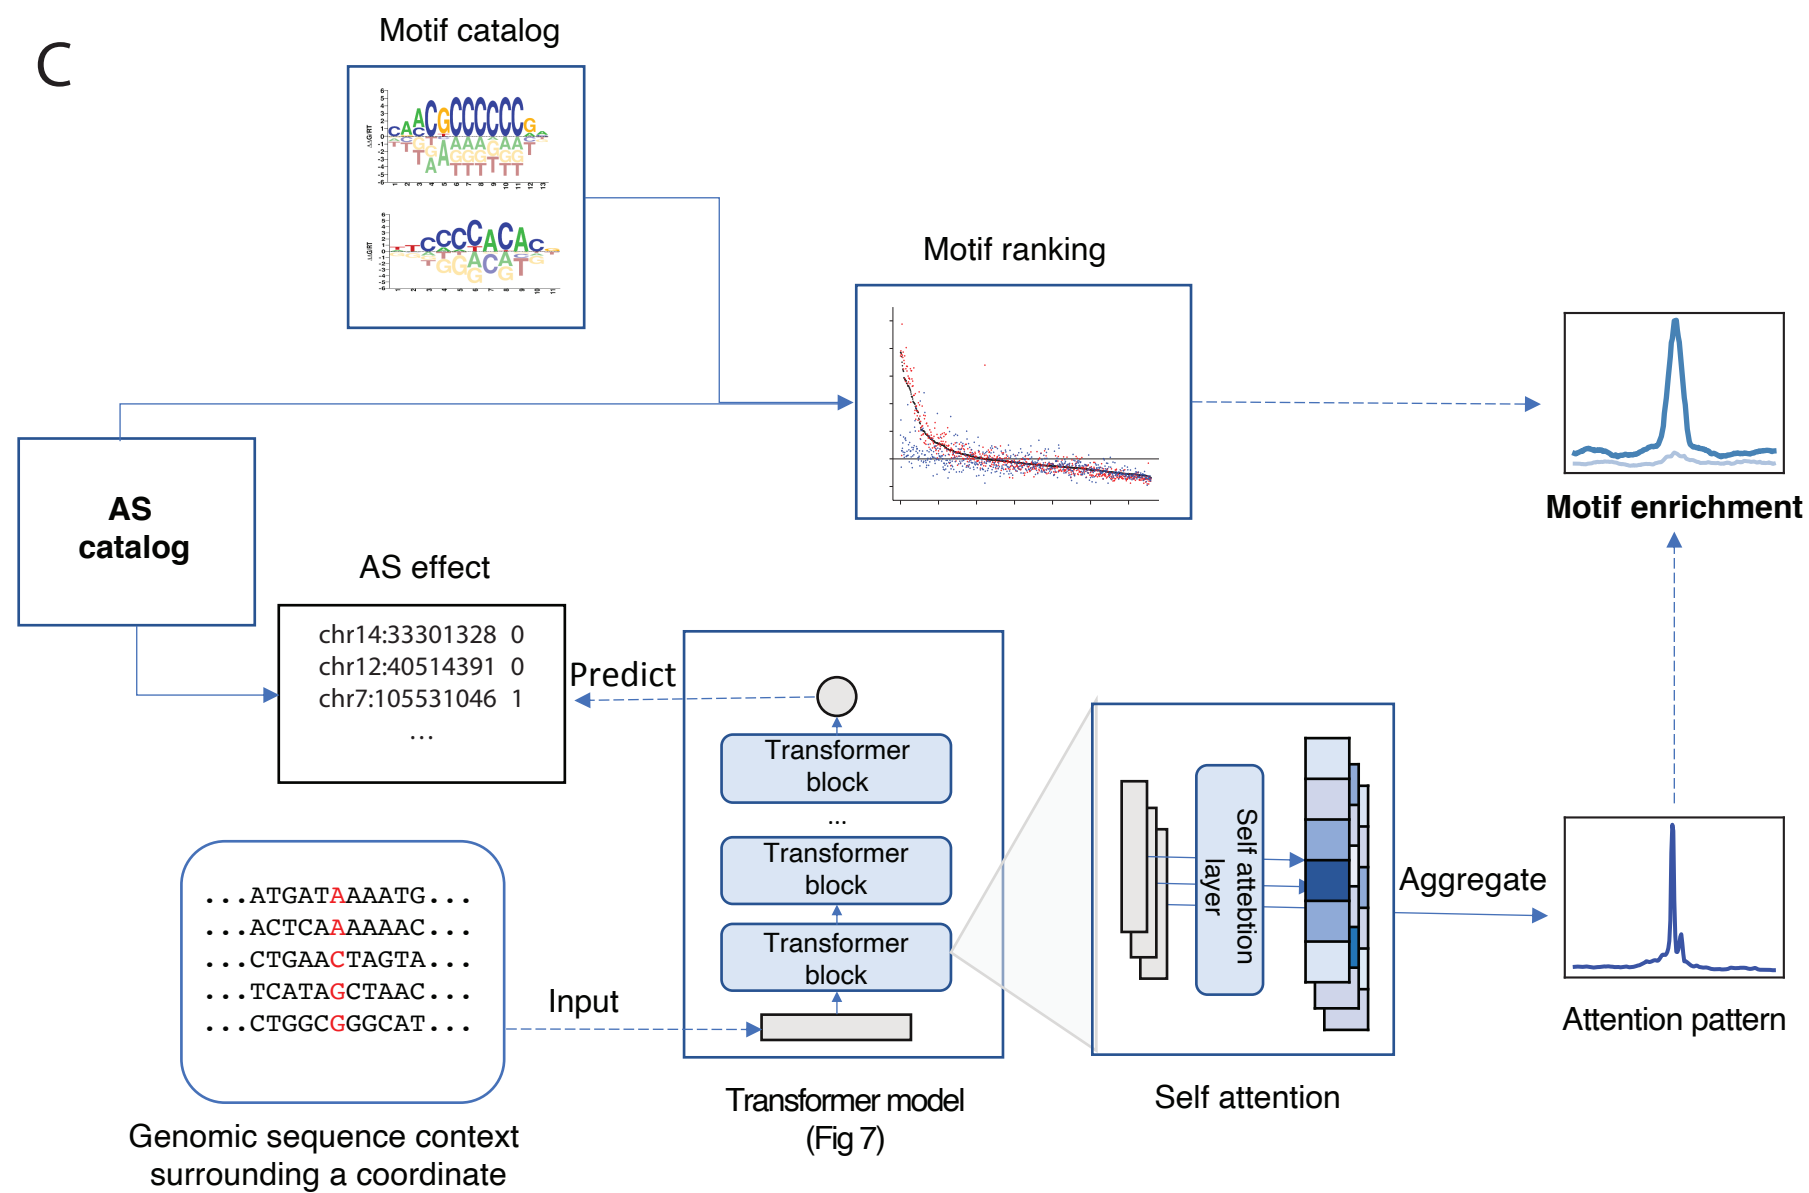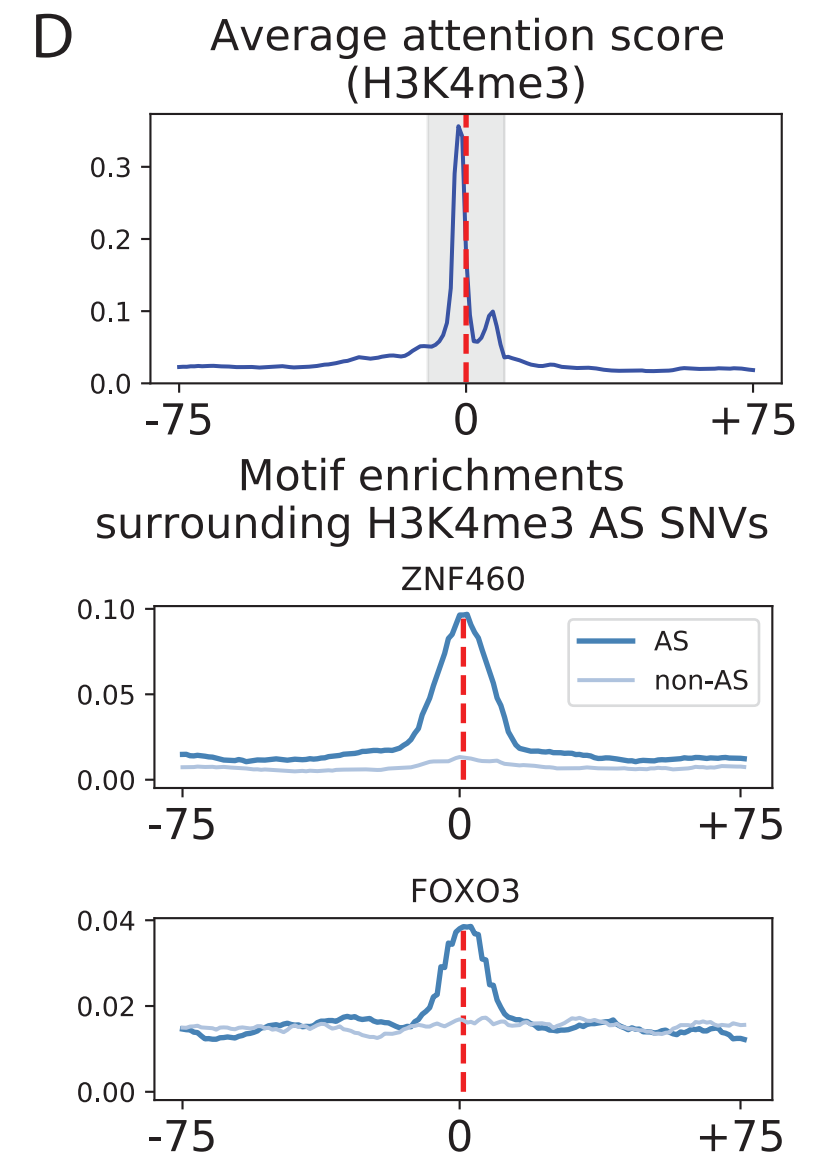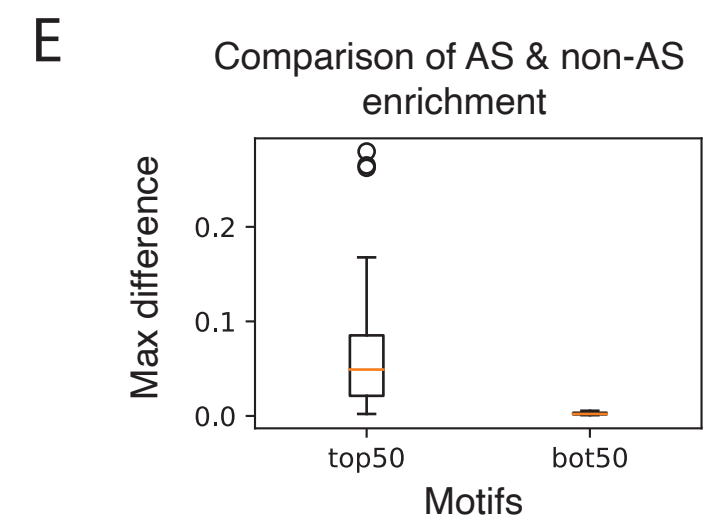

Supplement: NIHMS1885972-supplement-9.pdf [file NIHMS1885972-supplement-9.pdf]
